# Supplementary material for: Vicinal stereocenters via asymmetric allylic alkylation and Cope rearrangement: a straightforward route to functionally and stereochemically rich heterocycles
Source: Royal Society of Chemistry journal article supplement (doi:10.1039/d2sc07021a), 2023-01-01
Supplement: d2sc07021a1.pdf [file d2sc07021a1.pdf]

## Supplementary Information

### **Vicinal Stereocenters via Asymmetric Allylic Alkylation and Cope rearrangement; A Straightforward Route to Functionally and Stereochemically Rich Heterocycles**

Aleksandra Nilova,<sup>†</sup> Michael D. Mannchen,<sup>†</sup> Abdias N. Noel, Evgeniya Semenova, and Alexander J. Grenning\*

## Table of Contents

|                                                                                     |      |
|-------------------------------------------------------------------------------------|------|
| General considerations .....                                                        | 3    |
| Experimental procedures .....                                                       | S3   |
| Synthesis of alkylidenemalononitriles .....                                         | S3   |
| Synthesis of allylic electrophiles .....                                            | S5   |
| General procedure A. Synthesis of methyl carbonate protected allylic alcohols. .... | S5   |
| General procedure B. Synthesis of acetate protected allylic electrophiles. ....     | S5   |
| Synthesis of electrophile <b>rac-2a-Boc</b> . ....                                  | S6   |
| Synthesis of electrophile <b>rac-2i-Ac</b> . ....                                   | S6   |
| Asymmetric allylic alkylation followed by Cope rearrangement .....                  | S12  |
| Reaction optimization .....                                                         | S12  |
| General procedure C.....                                                            | S12  |
| Reductive Cope rearrangement.....                                                   | S27  |
| General procedure D .....                                                           | S27  |
| Reactivity of <i>meso</i> -4- <i>tert</i> -butylcyclohexylidenemalononitrile .....  | S29  |
| Conjugate reduction of alkylidenemalononitriles <b>4</b> .....                      | S29  |
| General procedure E.....                                                            | S29  |
| Conjugate reduction of alkylidenemalononitrile <b>4dd</b> . ....                    | S31  |
| Oxidative amidation and esterification of malononitriles .....                      | S32  |
| General procedure F.....                                                            | S32  |
| Ring-opening metathesis: synthesis of compound <b>9</b> .....                       | S36  |
| 2-pot protocol toward compound <b>8</b> .....                                       | S37  |
| Telescoped sequence allylic alkylation/Cope rearrangement/reduction. ....           | S37  |
| Ring rearrangement metathesis/oxidative amidation sequence. ....                    | S38  |
| Synthesis of lactones .....                                                         | S38  |
| General procedure G. Alkene ozonolysis followed by reduction. ....                  | S38  |
| X-ray Crystallography data .....                                                    | S41  |
| Crystal structure data for compound <b>4y</b> .....                                 | S42  |
| Crystal structure data for compound <b>11b</b> . ....                               | S51  |
| References.....                                                                     | S59  |
| NMR spectra .....                                                                   | S60  |
| HPLC data .....                                                                     | S141 |

## General considerations

Commercially available reagents and solvents were used without further purification. Allylic alkylation reactions were performed in flame-dried or oven-dried glassware under an argon or nitrogen atmosphere using dry, deoxygenated solvents. Solvents were dried by passage through an activated alumina column under argon. Alkylidenemalononitriles **1b** – **1f**, **1h**, and **1i**, (*S,S*)-DACH-phenyl Trost ligand, and allylic electrophile **rac-2l** were prepared according to literature procedures.<sup>1-8</sup>

Reaction progress was monitored by thin-layer chromatography (TLC) and visualized by UV irradiation and KMnO<sub>4</sub> stain. Crude materials were purified by flash column chromatography on silica gel. <sup>1</sup>H, <sup>13</sup>C {<sup>1</sup>H}, <sup>19</sup>F {<sup>1</sup>H} NMR spectra were obtained at 298 K, unless otherwise stated, in CDCl<sub>3</sub>, DMSO-*d*<sub>6</sub>, or CD<sub>3</sub>CN on 400 MHz, 500 MHz, or 600 MHz spectrometer and referenced to residual solvent peaks.<sup>9</sup> The chemical shifts are reported in ppm. The following notation is used: br – broad signal, s – singlet, d – doublet, t – triplet, q – quartet, p – pentet, m – multiplet, dd – doublet of doublets, dt – doublet of triplets, dq – doublet of quartet, dp – doublet of pentet, and ddd – doublet of doublets. Analytical chiral HPLC was performed utilizing Chiralpak AD-H, IA, or ID columns (4.6 mm x 150 mm) at 30 °C. HRMS data were obtained by electron spray ionization (ESI) with an ion trap mass analyzer or direct analysis in real time (DART).

## Experimental procedures

### Synthesis of alkylidenemalononitriles

Alkylidenemalononitriles **1b** – **1f**, **1h**, and **1i** were prepared according to literature procedures.<sup>1-6</sup>

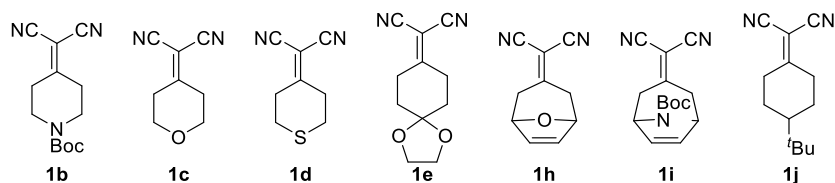

### Compound 1a

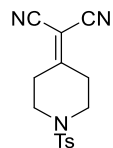

To a solution of 1-tosylpiperidin-4-one<sup>10</sup> (1.0 equiv., 7.37 g, 29 mmol) in toluene (100 mL, 0.3 M) malononitrile (1.2 equiv., 1.31 g, 35 mmol), ammonium acetate (1.3 equiv., 2.92 g, 38 mmol), and glacial acetic acid (5.0 equiv., 8.3 mL, 145 mmol) were added. The reaction vessel was equipped with a Dean-Stark apparatus and heated at reflux for 3 hours. The reaction mixture was concentrated by rotary evaporation. Crude material was dissolved in EtOAc and washed with NaHCO<sub>3</sub> (sat. aq.) to quench any remaining acetic acid. The aqueous layer was extracted twice with EtOAc. The combined organics were washed with brine, dried with anhydrous Na<sub>2</sub>SO<sub>4</sub>, and concentrated. Title compound was purified by column chromatography on silica gel with 1%-3% MeOH/DCM in hexanes as an eluent and obtained as a light-yellow solid in 55% yield (4.84 g, 16 mmol).

R<sub>f</sub> = 0.25 in 20% EtOAc in hexanes.

<sup>1</sup>H NMR (400 MHz, CDCl<sub>3</sub>) δ 7.64 (d, *J* = 8.3 Hz, 2H), 7.34 (d, *J* = 8.0 Hz, 2H), 3.25 (dd, *J* = 5.8 Hz, 4H), 2.84 (dd, *J* = 5.8 Hz, 4H), 2.43 (s, 3H).

<sup>13</sup>C NMR (101 MHz, CDCl<sub>3</sub>) δ 177.1, 144.6, 133.0, 130.2, 127.6, 110.9, 85.5, 46.0, 33.4, 21.7.

**HRMS (ESI-TOF):**  $[M-H]^-$  Calculated for  $C_{15}H_{14}N_3O_2S^-$  300.0812; found 300.0811.

#### Compound 1f

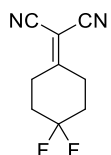

To a solution of 4,4-difluorocyclohexan-4-one (1 equiv., 1.00 g, 7.46 mmol) in toluene (75 mL, 1.0 M) malononitrile (1.1 equiv., 0.541 g, 8.20 mmol), ammonium acetate (0.5 equiv., 0.287 g, 3.73 mmol), and glacial acetic acid (1 equiv., 0.43 mL, 7.46 mmol) were added. The reaction vessel was equipped with a Dean-Stark apparatus and heated at reflux for 4 hours. The reaction mixture was concentrated by rotary evaporation. Crude material was dissolved in EtOAc and washed with 50 mL  $NaHCO_3$  (sat. aq.) to quench any remaining acetic acid. The aqueous layer was extracted twice with 50 mL EtOAc. The combined organics were washed with brine, dried with anhydrous  $Na_2SO_4$ , and concentrated. Title compound was purified by silica gel column chromatography and obtained in 69% yield (0.943 g, 5.17 mmol) as a white solid.

$R_f$  = 0.52 in 20% EtOAc in hexanes.

$^1H$  NMR (400 MHz,  $CDCl_3$ )  $\delta$  2.89 (dd,  $J$  = 8.0 Hz, 4H), 2.19 (tt,  $J$  = 12.9, 6.9 Hz, 4H).

$^{13}C$  NMR (101 MHz,  $CDCl_3$ )  $\delta$  177.8, 120.7 (t,  $J$  = 242.2 Hz), 111.1, 85.8, 33.2 (t,  $J$  = 25.8 Hz), 30.1 (t,  $J$  = 5.5 Hz).

$^{19}F$  NMR (377 MHz,  $CDCl_3$ )  $\delta$  -100.0.

**HRMS (ESI<sup>+</sup>):**  $[M - H]^+$  calculated for  $C_9H_7F_2N_2^+$  181.0583; found 181.0588.

#### Compound 1g

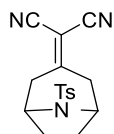

N-Ts protection of 8-azabicyclo[3.2.1]octan-3-one was performed according to the modified literature procedure.<sup>11</sup> To a suspension of 8-azabicyclo[3.2.1]octan-3-one hydrochloride (1.0 equiv., 1.62 g, 10.0 mmol) in DCM (20 mL), *N,N*-diisopropylethylamine (2.0 equiv., 3.5 mL, 20.0 mmol) was added at stirring followed by slow addition of *p*-toluenesulfonyl chloride (1.01 equiv., 1.93 g, 10.1 mmol). The reaction mixture was stirred at room temperature for 3 hours. The organic layer was washed with saturated aqueous solution of  $NH_4Cl$  (2 $\times$ ) and brine and dried over anhydrous  $Na_2SO_4$ . Solvent was evaporated under reduced pressure, and the solid residue was washed with  $Et_2O$  and dried by suction filtration providing a white solid (2.51 g, 9.0 mmol) that was used without further purification to synthesize compound **1g** according to the modified literature procedure.<sup>6</sup> The obtained ketone (1 equiv., 2.51 g, 9.0 mmol), malononitrile (1 equiv., 0.59 g, 9.0 mmol), ammonium acetate (0.5 equiv., 0.35 g, 4.5 mmol) and acetic acid (1 equiv., 0.51 mL, 9 mmol) were dissolved in toluene (9 mL) in a round-bottom flask equipped with a stir bar, Dean-Stark apparatus, and a condenser. The reaction mixture was refluxed for 3 hours, removed from heat, and the solvent was evaporated under reduced pressure. The contents of the flask were transferred to a fritted funnel with EtOAc, washed with water (3 $\times$ ) and EtOAc leaving behind a grey to brown solid. EtOAc/water mixture was transferred to a separatory funnel; the organic layer was separated and washed with saturated aqueous solution of  $NaHCO_3$  and brine. The organic layer was dried over anhydrous  $Na_2SO_4$ , filtered, and concentrated under reduced pressure to

provide a solid residue. The collected solids were combined and recrystallized from EtOH to provide the desired product in 78% yield (2.54 g, 7.8 mmol) as a pale-yellow solid.

$R_f = 0.31$  in 30% EtOAc in hexanes.

$^1\text{H NMR}$  (600 MHz,  $\text{CDCl}_3$ )  $\delta$  7.75 (d,  $J = 8.3$  Hz, 2H), 7.32 (d,  $J = 8.3$  Hz, 2H), 4.48 – 4.42 (m, 1H), 2.98 – 2.88 (m, 4H), 2.44 (s, 3H), 1.72 – 1.66 (m, 2H), 1.50 – 1.42 (m, 2H).

$^{13}\text{C NMR}$  (101 MHz,  $\text{CDCl}_3$ )  $\delta$  177.3, 144.5, 136.4, 130.1, 127.3, 110.9, 88.6, 56.2, 41.7, 29.0, 21.7.

**HRMS (ESI<sup>+</sup>):**  $[\text{M} + \text{Na}]^+$  calculated for  $\text{C}_{17}\text{H}_{17}\text{N}_3\text{O}_2\text{SNa}^+$  350.0934; found 350.0942.

### Synthesis of allylic electrophiles

Compound **4I** was prepared according to the literature procedure and the spectral data is consistent with the previously reported.<sup>8</sup>

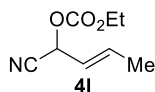

### General procedure A. Synthesis of methyl carbonate protected allylic alcohols.

#### Wittig reaction/reduction sequence

To a solution of (hetero)aryl aldehyde (1 equiv.) in DCM (0.5 M) or alkyl aldehyde (1 equiv.) in toluene (0.67 M) (acetylmethylene)triphenylphosphorane (1.1 equiv.) was added at stirring and the reaction mixture was allowed to react overnight at room temperature or at 100 °C correspondingly. Methanol (0.33 M) was added, and the solution was cooled to 0 °C in an ice-water bath.  $\text{NaBH}_4$  (1.0 equiv.) was added in one portion, and the reaction flask was raised from the ice-water bath. After 1 hour the reaction was quenched with saturated aqueous solution of ammonium chloride. The biphasic mixture was transferred to a separatory funnel, organic layer was separated, and aqueous layer was extracted with EtOAc (2 $\times$ ). Combined organic layers were washed with brine, dried over  $\text{Na}_2\text{SO}_4$ , and filtered. Solvent was evaporated under reduced pressure to provide crude allylic alcohols that were used without further purification unless otherwise stated.

#### Methyl carbonate protection of allylic alcohols

Crude allylic alcohol was dissolved in DCM (0.5 M), pyridine (3 equiv.) was added at stirring, and the flask was placed on an ice-water bath. Methyl chloroformate (3 equiv.) was added dropwise via addition funnel and the mixture was stirred overnight. The contents of the flask were transferred to a separatory funnel, washed with saturated aqueous solution of  $\text{NH}_4\text{Cl}$  (2 $\times$ ), and brine. The combined organic phases were dried over anhydrous  $\text{Na}_2\text{SO}_4$ , filtered, and concentrated under reduced pressure. The crude product was further purified by flash column chromatography on silica gel using EtOAc in hexanes as an eluent to provide the desired product.

### General procedure B. Synthesis of acetate protected allylic electrophiles.

Allylic alcohols were prepared according to Wittig-reaction/reduction sequence described in General procedure A and purified via column chromatography on silica gel with EtOAc in hexanes as eluent.

#### Acetate protection of allylic alcohols<sup>12</sup>

An allylic alcohol (1 equiv.) was dissolved in dry DCM (0.5 M) in a flame-dried Schlenk flask and cooled in an ice-water bath. DMAP (0.1 equiv.) and  $\text{Et}_3\text{N}$  (2 equiv.) were added, and the reaction was stirred for 20 minutes. Acetic anhydride (2 equiv.) was added dropwise, and the reaction was allowed to stir warming to room temperature. Upon

completion per TLC, the reaction was quenched with DI water (2 x reaction volume) and transferred to a separatory funnel. The aqueous layer was extracted three times with DCM, washed with brine, dried with sodium sulfate, filtered, and concentrated under reduced pressure. The crude material was purified using silica gel column chromatography.

#### Synthesis of electrophile *rac*-2a-Boc.

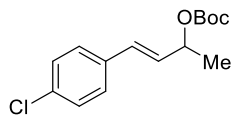

Prepared according to the literature procedure.<sup>13</sup> Alcohol **SI-1** (1 equiv., 0.91 mg, 5.0 mmol) was dissolved in THF (10 mL, 0.2 M) in a flame-dried Schlenk flask under a nitrogen atmosphere. The reaction was cooled in an ice-water bath, and *n*BuLi (1.6 M in THF, 1.1 equiv., 3.43 mL, 5.5 mmol) was added slowly. The mixture was stirred for 10 minutes, and Boc<sub>2</sub>O (1.2 equiv., 1.38 mL, 6 mmol) was added dropwise. Upon completion per TLC, the reaction was quenched with sat. aq. NH<sub>4</sub>Cl (25 mL), and the aqueous layer was extracted with EtOAc (2 x 25 mL). The combined organic layers were washed with brine, dried with Na<sub>2</sub>SO<sub>4</sub>, and concentrated under reduced pressure. The crude material was purified with silica gel column chromatography using EtOAc in hexanes as an eluent. The desired compound was obtained in 92% yield (1.30 g, 4.6 mmol) as a colorless oil.

*R<sub>f</sub>* = 0.80 in 20% EtOAc in hexanes.

<sup>1</sup>H NMR (400 MHz, CDCl<sub>3</sub>) δ 7.32 – 7.26 (m, 4H), 6.57 (d, *J* = 16.0 Hz, 1H), 6.17 (dd, *J* = 16.0, 6.9 Hz, 1H), 5.43 – 5.23 (m, 1H), 1.49 (s, 9H), 1.44 (d, *J* = 6.5 Hz, 3H).

<sup>13</sup>C NMR (101 MHz, CDCl<sub>3</sub>) δ 152.9, 134.9, 133.7, 130.6, 129.3, 128.8, 127.9, 82.2, 73.9, 27.9, 20.5.

HRMS (DART, 300 °C): [M + NH<sub>4</sub>]<sup>+</sup> calculated for C<sub>15</sub>H<sub>23</sub>ClNO<sub>3</sub><sup>+</sup> 300.1361; found 300.1355.

#### Synthesis of electrophile *rac*-2i-Ac.

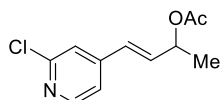

To a solution of 2-chloroisonicotinaldehyde (1 equiv., 2.48 g, 17.2 mmol) in DCM (0.5 M, 34 mL) (acetylmethylene)triphenylphosphorane (1.1 equiv., 5.85 g, 18.9 mmol) was added at stirring and the reaction mixture was left to react overnight at room temperature. Methanol (0.33 M, 53 mL) was added, and the solution was cooled to 0 °C in an ice-water bath. NaBH<sub>4</sub> (3.0 equiv., 1.95 g, 51.6 mmol) was added in one portion, and the reaction flask was warmed to room temperature. After 1 hour the reaction was quenched with saturated aqueous solution of ammonium chloride. The biphasic mixture was transferred to a separatory funnel, organic layer was separated, and aqueous layer was extracted with EtOAc (2x). The combined organic layers were washed with brine, dried with anhydrous Na<sub>2</sub>SO<sub>4</sub>, and concentrated under reduced pressure. The crude alcohol was dissolved in DCM (0.33 M, 53 mL) and cooled in an ice-water bath at stirring. Pyridine (2.5 equiv., 3.47 g, 43.0 mmol) was added followed by dropwise addition of acetyl chloride (1.4 equiv. 1.93 g, 24.1 mmol). The reaction was allowed to warm to room temperature and upon completion per TLC analysis the reaction was quenched with DI water (100 mL). The organic layer was separated, and the aqueous layer was extracted with DCM (50 mL). The combined organic layers were washed with brine, dried with anhydrous Na<sub>2</sub>SO<sub>4</sub>, and concentrated under reduced pressure. The compound was purified using silica gel column chromatography and obtained in 89% yield (3.52 g, 15.6 mmol) as a light-yellow oil.

*R<sub>f</sub>* = 0.33 in 20% EtOAc in hexanes.

**<sup>1</sup>H NMR (400 MHz, CDCl<sub>3</sub>)** δ 8.31 (d, *J* = 5.2 Hz, 1H), 7.28 (s, 1H), 7.16 (dd, *J* = 5.2, 1.3 Hz, 1H), 6.47 (d, *J* = 6.5 Hz, 1H), 6.39 (ddd, *J* = 24.3, 16.0, 5.8 Hz, 1H), 5.51 (p, *J* = 6.4 Hz, 1H), 2.09 (d, *J* = 1.4, 3H), 1.41 (d, *J* = 6.6, 3H).

**<sup>13</sup>C NMR (101 MHz, CDCl<sub>3</sub>)** δ 170.3, 152.3, 150.0, 147.1, 135.5, 127.6, 121.6, 119.9, 70.1, 21.4, 20.2.

**HRMS (EST-TOF):** [M+H]<sup>+</sup> Calculated for C<sub>11</sub>H<sub>13</sub>ClNO<sub>2</sub><sup>+</sup> 226.0629. Found 226.0639.

#### Compound SI-1

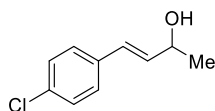

Prepared according to the Wittig reaction (DCM, room temperature)/reduction sequence of the General procedure A from 4-chlorobenzaldehyde on 20 mmol scale and obtained in 86% yield (3.15 g, 17 mmol) as a white solid. The spectral data is consistent with the previously reported.<sup>14</sup>

*R<sub>f</sub>* = 0.30 in 20% EtOAc in Hexanes

**<sup>1</sup>H NMR (600 MHz, CDCl<sub>3</sub>)** δ 7.33 – 7.27 (m, 4H), 6.53 (d, *J* = 15.9 Hz, 1H), 6.24 (dd, *J* = 15.9, 6.3 Hz, 1H), 4.49 (pd, *J* = 6.3, 1.0 Hz, 1H), 1.62 (br, 1H), 1.37 (d, *J* = 6.3 Hz, 3H).

**<sup>13</sup>C NMR (101 MHz, CDCl<sub>3</sub>)** δ 135.3, 134.3, 133.4, 128.9, 128.4, 127.8, 68.9, 23.5.

#### Compound SI-2

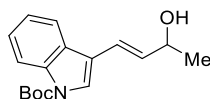

Prepared according to the Wittig reaction (toluene, 100 °C)/reduction sequence of General procedure A from *N*-Boc indole-3-carboxaldehyde<sup>15</sup> on 9.4 mmol scale and obtained in 67% yield (1.81 g, 6.3 mmol) as a yellow oil.

*R<sub>f</sub>* = 0.21 in 20% EtOAc in hexanes.

**<sup>1</sup>H NMR (400 MHz, CDCl<sub>3</sub>)** δ 8.18 (d, *J* = 8.3 Hz, 1H), 7.79 – 7.72 (m, 1H), 7.58 (s, 1H), 7.34 (ddd, *J* = 8.3, 7.2, 1.3 Hz, 1H), 7.26 (ddd, *J* = 8.3, 6.9, 1.1 Hz, 1H), 6.64 (dd, *J* = 16.2, 1.1 Hz, 1H), 6.35 (dd, *J* = 16.1, 6.3 Hz, 1H), 4.50 (pd, *J* = 6.3, 1.2 Hz, 1H), 2.67 (s, 1H), 1.67 (s, 9H), 1.42 (d, *J* = 6.4 Hz, 3H).

**<sup>13</sup>C NMR (101 MHz, CDCl<sub>3</sub>)** δ 149.6, 135.9, 134.1, 128.7, 124.6, 123.7, 122.8, 120.4, 119.9, 118.2, 115.3, 83.8, 69.1, 28.1, 23.5.

**HRMS (ESI<sup>+</sup>):** [M – OH]<sup>+</sup> calculated for C<sub>17</sub>H<sub>20</sub>NO<sub>2</sub><sup>+</sup> 270.1489; found 270.1497.

#### Compound *rac*-2a

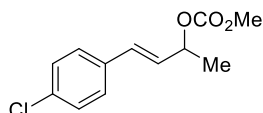

Prepared according to the General procedure A on 20 mmol scale using 5 equiv. of methyl chloroformate and obtained in 84% yield (4.04 g, 17 mmol) as a pale-yellow oil.

*R<sub>f</sub>* = 0.52 in 20% EtOAc in hexanes.

**<sup>1</sup>H NMR (600 MHz, CDCl<sub>3</sub>)** δ 7.33 – 7.26 (m, 4H), 6.60 (d, *J* = 16.0 Hz, 1H), 6.17 (dd, *J* = 16.0, 6.9 Hz, 1H), 5.40 – 5.32 (m, 1H), 3.79 (s, 3H), 1.46 (d, *J* = 6.4 Hz, 3H).

**<sup>13</sup>C NMR (101 MHz, CDCl<sub>3</sub>)** δ 155.3, 134.8, 133.9, 131.1, 128.9(1), 128.8(9), 128.0, 75.2, 54.8, 20.6.

**HRMS (DART<sup>+</sup>):** [M-OCO<sub>2</sub>Me]<sup>+</sup> calculated for C<sub>10</sub>H<sub>10</sub>Cl<sup>+</sup> 165.0466; found 165.0471.

#### Compound *rac*-2a-Ac

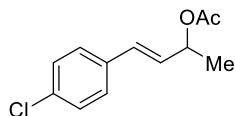

Prepared according to the General procedure B on 2.4 mmol scale and obtained in 85% yield (0.46 g, 2.0 mmol) as a colorless oil. The spectral data is consistent with the previously reported.<sup>12</sup>

*R<sub>f</sub>* = 0.63 in 20% EtOAc in hexanes.

**<sup>1</sup>H NMR (400 MHz, CDCl<sub>3</sub>)** δ 7.27 – 7.16 (m, 6H), 6.48 (d, *J* = 16.0 Hz, 1H), 6.09 (dd, *J* = 16.0, 6.7 Hz, 1H), 5.44 (p, *J* = 6.5 Hz, 1H), 2.00 (s, 3H), 1.33 (d, *J* = 6.5 Hz, 3H).

**<sup>13</sup>C NMR (101 MHz, CDCl<sub>3</sub>)** δ 170.4, 135.0, 133.7, 130.4, 129.6, 128.9, 127.9, 70.9, 21.5, 20.4.

**HRMS (DART, 300 °C):** [M+NH<sub>4</sub>]<sup>+</sup> calculated for C<sub>12</sub>H<sub>17</sub>ClNO<sub>2</sub> 242.0942; found 242.0932.

#### Compound *rac*-2b

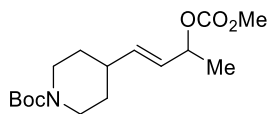

Prepared according to the General procedure A on 5.0 mmol scale and obtained in 90% yield (1.40 g, 4.5 mmol) as a colorless oil.

*R<sub>f</sub>* = 0.36 in 30% EtOAc in hexanes.

**<sup>1</sup>H NMR (400 MHz, CDCl<sub>3</sub>)** δ 5.69 (dd, *J* = 15.6, 6.4 Hz, 1H), 5.47 (ddd, *J* = 15.6, 6.9, 1.3 Hz, 1H), 5.15 (dq, appears as p, *J* = 6.5 Hz, 1H), 4.07 (br, 2H), 3.76 (s, 3H), 2.80 – 2.61 (m, 2H), 2.16 – 2.04 (m, 1H), 1.68 – 1.61 (m, 2H), 1.44 (s, 9H), 1.34 (d, *J* = 6.5 Hz, 3H), 1.29 – 1.19 (m, 2H).

**<sup>13</sup>C NMR (101 MHz, CDCl<sub>3</sub>)** δ 155.1, 154.9, 137.5, 127.7, 79.4, 75.3, 54.6, 43.7, 38.5, 31.4, 28.5, 20.5.

**HRMS (ESI<sup>+</sup>):** [M+Na]<sup>+</sup> calculated for C<sub>16</sub>H<sub>27</sub>NO<sub>5</sub>Na<sup>+</sup> 336.1781; found 336.1789.

#### Compound *rac*-2c

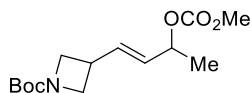

Prepared according to the General procedure A on 1.45 mmol scale using 2 equiv. of pyridine and 2 equiv. of methyl chloroformate and obtained in 57% yield (0.240 g, 0.84 mmol) as a colorless oil.

*R<sub>f</sub>* = 0.43 in 30% EtOAc in hexanes.



**<sup>1</sup>H NMR (600 MHz, CDCl<sub>3</sub>)** δ 5.91 (ddd, *J* = 15.5, 8.1, 1.1 Hz, 1H), 5.55 (ddd, *J* = 15.5, 6.5, 1.1 Hz, 1H), 5.18 (ddq, appears as dp, *J* = 6.5, 1.1 Hz, 1H), 4.07 (ddd, appears as dt, *J* = 8.5, 1.7 Hz, 2H), 3.77 (s, 3H), 3.76 – 3.68 (m, 2H), 3.22 – 3.12 (m, 1H), 1.43 (s, 9H), 1.36 (d, *J* = 6.5 Hz, 3H).

**<sup>13</sup>C NMR (101 MHz, CDCl<sub>3</sub>)** δ 156.4, 155.2, 133.5, 130.5, 79.6, 74.7, 54.7, 54.6, 54.5, 31.0, 28.5, 20.4.

**HRMS (ESI<sup>+</sup>):** [M + Na]<sup>+</sup> calculated for C<sub>14</sub>H<sub>26</sub>NO<sub>5</sub>Na<sup>+</sup> 308.1468; found 308.1476.

#### Compound *rac*-2d

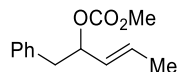

Prepared from the corresponding allylic alcohol<sup>16</sup> (335 mg, 2.06 mmol) using General procedure A on a 2.06 mmol and obtained in 37% yield (169 mg, 0.77 mmol) as a colorless oil.

*R<sub>f</sub>* = 0.44 in 10% EtOAc in hexanes.

**<sup>1</sup>H NMR (400 MHz, CDCl<sub>3</sub>)** δ 7.33 – 7.27 (m, 2H), 7.24 – 7.17 (m, 3H), 5.80 – 5.67 (m, 1H), 5.47 (ddd, *J* = 15.3, 7.6, 1.6 Hz, 1H), 5.22 (q, *J* = 7.1 Hz, 1H), 3.72 (s, 3H), 3.00 (dd, *J* = 13.8, 7.4 Hz, 1H), 2.88 (dd, *J* = 13.8, 6.2 Hz, 1H), 1.67 (d, *J* = 6.5, 1.5 Hz, 3H).

**<sup>13</sup>C NMR (101 MHz, CDCl<sub>3</sub>)** δ 155.2, 137.0, 130.7, 129.7, 128.4, 128.4, 126.7, 79.7, 54.6, 41.3, 17.8.

**HRMS (DART<sup>+</sup>):** [M+NH<sub>4</sub>]<sup>+</sup> Calculated for C<sub>13</sub>H<sub>20</sub>NO<sub>3</sub> 243.0992. Found 243.0990.

#### Compound *rac*-2e

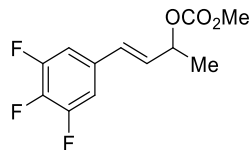

Prepared according to the General procedure A on 2 mmol scale using 3 equiv. of methyl chloroformate and obtained in 81% yield (0.42 g, 1.6 mmol) as a colorless oil.

*R<sub>f</sub>* = 0.52 in 20% EtOAc in hexanes.

**<sup>1</sup>H NMR (600 MHz, CDCl<sub>3</sub>)** δ 7.02 – 6.94 (m, 2H), 6.49 (d, *J* = 15.9 Hz, 1H), 6.12 (dd, *J* = 15.9, 6.6 Hz, 1H), 5.34 (ddq, appears as dp, *J* = 6.6, 1.2 Hz, 1H), 3.79 (s, 3H), 1.46 (d, *J* = 6.6 Hz, 3H).

**<sup>13</sup>C NMR (101 MHz, CDCl<sub>3</sub>)** δ 155.2, 151.5 (dd, *J* = 249.5, 4.2 Hz), 151.4 (dd, *J* = 249.6, 4.1 Hz), 139.5 (dt, *J* = 252.7, 15.6 Hz), 132.6 (dt, *J* = 7.8, 4.7 Hz), 130.7 (d, *J* = 2.6 Hz), 129.3 (q, *J* = 2.4 Hz), 110.8 – 110.4 (m), 74.5, 54.9, 20.4.

**<sup>19</sup>F NMR (377 MHz, CDCl<sub>3</sub>)** δ -134.4 (d, *J* = 20.3 Hz), -160.8 (t, *J* = 20.3 Hz).

**HRMS (DART<sup>+</sup>):** [M-OCO<sub>2</sub>Me]<sup>+</sup> calculated for C<sub>10</sub>H<sub>9</sub>F<sub>2</sub><sup>+</sup> 185.0573; found 185.0594.

#### Compound *rac*-2f

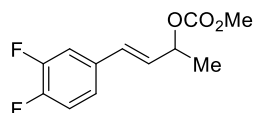

Prepared according to the General procedure A on 5.0 mmol scale and obtained in 65% yield (0.790 g, 3.2 mmol) as a colorless oil.

$R_f = 0.69$  in 30% EtOAc in hexanes.

$^1\text{H NMR}$  (400 MHz,  $\text{CDCl}_3$ )  $\delta$  7.23 – 7.16 (m, 1H), 7.13 – 7.03 (m, 2H), 6.55 (d,  $J = 15.9$  Hz, 1H), 6.11 (dd,  $J = 15.9, 6.8$  Hz, 1H), 5.40 – 5.30 (m, 1H), 3.79 (s, 3H), 1.46 (d,  $J = 6.5$  Hz, 3H).

$^{13}\text{C NMR}$  (101 MHz,  $\text{CDCl}_3$ )  $\delta$  155.2, 150.6 (dd,  $J = 246.9, 11.8$  Hz), 150.2 (dd,  $J = 248.9, 12.2$  Hz), 133.5 (dd,  $J = 6.0, 4.0$  Hz), 130.3 (dd,  $J = 1.9$  Hz), 129.4 (d,  $J = 2.5$  Hz), 123.1 (dd,  $J = 6.2, 3.5$  Hz), 117.5 (d,  $J = 17.3$  Hz), 115.1 (d,  $J = 17.6$  Hz), 74.9, 54.8, 20.5.

$^{19}\text{F NMR}$  (565 MHz,  $\text{CDCl}_3$ )  $\delta$  -137.7 (d,  $J = 20.7$  Hz), -138.3 (d,  $J = 20.7$  Hz).

**HRMS (DART<sup>+</sup>):**  $[\text{M}-\text{OCO}_2\text{Me}]^+$  calculated for  $\text{C}_{10}\text{H}_9\text{F}_2^+$  167.0667; found 167.0663.

#### Compound *rac*-2g

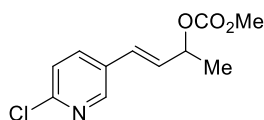

Prepared according to the General procedure A on 10 mmol scale using 5 equiv. of pyridine and 10 equiv. of methyl chloroformate and obtained in 81% yield (1.95 g, 8.1 mmol) as a colorless oil.

$R_f = 0.47$  in 30% EtOAc in hexanes.

$^1\text{H NMR}$  (400 MHz,  $\text{CDCl}_3$ )  $\delta$  8.35 (d,  $J = 2.5$  Hz, 1H), 7.66 (dd,  $J = 8.5, 2.5$  Hz, 1H), 7.27 (d, overlaps with solvent peak at 7.26,  $J = 8.5$  Hz, 1H), 6.59 (d,  $J = 16.1$  Hz, 1H), 6.24 (dd,  $J = 16.1, 6.5$  Hz, 1H), 5.36 (ddq, appears as dp,  $J = 6.5, 1.2$  Hz, 1H), 3.79 (s, 3H), 1.47 (d,  $J = 6.5$  Hz, 3H).

$^{13}\text{C NMR}$  (101 MHz,  $\text{CDCl}_3$ )  $\delta$  155.1, 152.3, 150.0, 146.9, 134.6, 128.1, 121.6, 119.9, 74.1, 54.9, 20.3.

**HRMS (ESI<sup>+</sup>):**  $[\text{M} + \text{H}]^+$  calculated for  $\text{C}_{11}\text{H}_{13}\text{ClNO}_3^+$  242.0579; found 242.0579.

#### Compound *rac*-2h

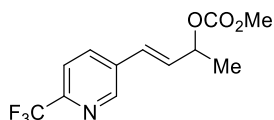

Prepared according to the General procedure A on 5.7 mmol scale using 5 equiv. of pyridine and 10 equiv. of methyl chloroformate and obtained in 52% yield (0.82 g, 3.0 mmol) as a colorless oil.

$R_f = 0.68$  in 40% EtOAc in hexanes.

$^1\text{H NMR}$  (400 MHz,  $\text{CDCl}_3$ )  $\delta$  8.70 (d,  $J = 2.2$  Hz, 1H), 7.85 (dd,  $J = 8.2, 2.2$  Hz, 1H), 7.64 (d,  $J = 8.2$  Hz, 1H), 6.68 (d,  $J = 16.1$  Hz, 1H), 6.38 (dd,  $J = 16.1, 6.5$  Hz, 1H), 5.40 (ddq, appears as dp,  $J = 6.5, 1.3$  Hz, 1H), 3.80 (s, 3H), 1.49 (d,  $J = 6.5$  Hz, 3H).

$^{13}\text{C NMR}$  (101 MHz,  $\text{CDCl}_3$ )  $\delta$  155.1, 148.6, 147.3 (q,  $J = 34.8$  Hz), 134.8, 134.4, 133.3, 127.0, 121.6 (q,  $J = 273.9$  Hz), 120.5 (q,  $J = 2.8$  Hz), 74.4, 54.9, 20.4.

$^{19}\text{F NMR}$  (377 MHz,  $\text{CDCl}_3$ )  $\delta$  -67.8.

**HRMS (ESI<sup>+</sup>):** [M+H]<sup>+</sup> calculated for C<sub>12</sub>H<sub>13</sub>F<sub>3</sub>NO<sub>3</sub><sup>+</sup> 276.0842; found 276.0852.

**Compound *rac-2i***

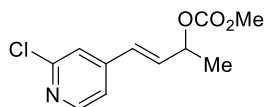

Prepared according to the General procedure A on 7.0 mmol scale using 5 equiv. of pyridine and 10 equiv. of methyl chloroformate and obtained in 65% yield (1.10 g, 4.5 mmol) as a colorless oil.

R<sub>f</sub> = 0.58 in 40% EtOAc in hexanes.

**<sup>1</sup>H NMR (600 MHz, CDCl<sub>3</sub>)** δ 8.31 (dd, *J* = 5.2, 0.7 Hz, 1H), 7.30 – 7.26 (m, 1H), 7.16 (dd, *J* = 5.2, 1.5 Hz, 1H), 6.54 (dt, *J* = 16.0, 0.8 Hz, 1H), 6.42 (dd, *J* = 16.0, 6.5 Hz, 1H), 5.37 (ddq, appears as dp, *J* = 6.5, 1.2 Hz, 1H), 3.80 (s, 3H), 1.47 (d, *J* = 6.5 Hz, 3H).

**<sup>13</sup>C NMR (101 MHz, CDCl<sub>3</sub>)** δ 155.1, 152.3, 150.0, 146.9, 134.6, 128.1, 121.6, 119.9, 74.1, 54.9, 20.3.

**HRMS (ESI<sup>+</sup>):** [M+H]<sup>+</sup> calculated for C<sub>11</sub>H<sub>13</sub>ClNO<sub>3</sub><sup>+</sup> 242.0579; found 242.0589.

**Compound *rac-2j***

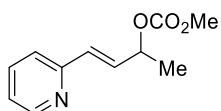

Prepared according to the General procedure A on 11.2 mmol scale using 5 equiv. of pyridine and 10 equiv. of methyl chloroformate and obtained in 42% yield (0.97 g, 4.7 mmol) as a colorless oil.

R<sub>f</sub> = 0.39 in 40% EtOAc in hexanes.

**<sup>1</sup>H NMR (400 MHz, CDCl<sub>3</sub>)** δ 8.61 – 8.50 (m, 1H), 7.63 (ddd, appears as dt, *J* = 7.6, 1.9 Hz, 1H), 7.28 (m, overlaps with solvent peak at 7.26, 1H), 7.14 (ddd, *J* = 7.6, 4.8, 1.2 Hz, 1H), 6.80 – 6.65 (m, 2H), 5.47 – 5.37 (m, 1H), 3.78 (s, 3H), 1.48 (d, *J* = 6.5 Hz, 3H).

**<sup>13</sup>C NMR (101 MHz, CDCl<sub>3</sub>)** δ 155.2, 154.7, 149.7, 136.7, 132.7, 131.2, 122.7, 122.3, 74.7, 54.8, 20.5.

**HRMS (ESI<sup>+</sup>):** [M + H]<sup>+</sup> calculated for C<sub>11</sub>H<sub>14</sub>NO<sub>3</sub><sup>+</sup> 208.0968; found 208.0976.

**Compound *rac-2k-Ac***

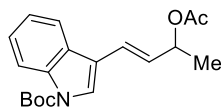

Prepared according to the General procedure B on a 3.1 mmol scale and obtained in 77% yield (0.80 g, 2.4 mmol) as a yellow oil.

R<sub>f</sub> = 0.70 in 20% EtOAc in hexanes.

**<sup>1</sup>H NMR (400 MHz, CDCl<sub>3</sub>)** δ 8.17 (d, *J* = 8.2 Hz, 1H), 7.77 (dt, *J* = 7.8, 1.0 Hz, 1H), 7.63 (s, 1H), 7.34 (ddd, *J* = 8.4, 7.2, 1.4 Hz, 1H), 7.29 (dd, *J* = 7.7, 1.2 Hz, 1H), 6.72 (dt, *J* = 16.1, 0.9 Hz, 1H), 6.28 (dd, *J* = 16.1, 6.9 Hz, 1H), 5.55 (pd, *J* = 6.5, 1.2 Hz, 1H), 2.09 (s, 3H), 1.67 (s, 9H), 1.45 (d, *J* = 6.5 Hz, 3H).

$^{13}\text{C}$  NMR (101 MHz,  $\text{CDCl}_3$ )  $\delta$  170.5, 149.6, 136.1, 129.2, 128.6, 124.8, 124.5, 123.3, 123.0, 120.0, 117.9, 115.5, 84.0, 71.6, 28.3, 21.6, 20.6.

HRMS (DART, 330 °C):  $[\text{M}+\text{NH}_4]^+$  calculated for  $\text{C}_{19}\text{H}_{27}\text{N}_2\text{O}^+$  347.1965; found 347.1967.

## Asymmetric allylic alkylation followed by Cope rearrangement

### Reaction optimization

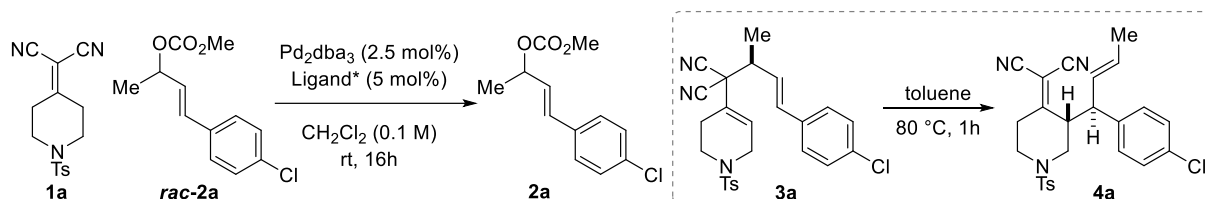

To an oven-dried 10 mL Schlenk flask equipped with a magnetic stir bar  $\text{Pd}_2(\text{dba})_3$  (2.5 mol%, 0.0046 g, 0.005 mmol), (*S,S*)-DACH-phenyl Trost ligand (5 mol%, 0.0069 g, 0.01 mmol), and alkylidenemalononitrile **1a** (1 equiv., 0.060 g, 0.2 mmol) were added. The flask was sealed with a rubber septum, and the contents were placed under  $\text{N}_2$  atmosphere. Anhydrous DCM (2 mL) was added via syringe, and the solution was stirred for 15 minutes (solution turned from purple to yellow-brown). An allylic electrophile **rac-2a** (2.5 equiv., 0.120 g, 0.5 mmol) was added via syringe, and the contents were left to react overnight (16 hours) at room temperature. The resulting mixture was concentrated under reduced pressure, and unreacted compound **2a** was isolated by silica gel column chromatography (0.048 g, 0.2 mmol; HPLC: Chiralpak AD-H, *i*-PrOH:hexanes = 2:98, flow rate = 1 mL/min, UV = 254 nm,  $t_{\text{R}1}$  = 3.72 min (major) and  $t_{\text{R}2}$  = 4.69 min (minor), er = 92:8).

Compound **3a** was dissolved in toluene (2 mL), and the solution was heated at stirring at 80 °C for 1 hour. The Cope rearrangement product **4a** was isolated by silica gel column chromatography (see details below).

Table S1. Specific reaction conditions for the General procedure C.

|                    | <br><b>rac-2b - 2d, 2l</b>                                                   | <br><b>rac-2a, 2e - 2f</b>                                                  | <br><b>rac-2g - 2k</b>                                                      |
|--------------------|------------------------------------------------------------------------------|-----------------------------------------------------------------------------|-----------------------------------------------------------------------------|
| <br><b>1a - 1e</b> | <b>[AAA]</b> DCM (0.5 M), r.t.<br><b>[3,3]</b> toluene (0.1 M), 110 °C, 4 hr | <b>[AAA]</b> DCM (0.1 M), r.t.<br><b>[3,3]</b> toluene (0.1 M), 80 °C, 1 hr | <b>[AAA]</b> DCM (0.1 M), r.t.<br><b>[3,3]</b> toluene (0.1 M), 80 °C, 1 hr |
| <br><b>1g - 1i</b> | <b>[AAA]</b> DCM (0.5 M), r.t.<br><b>[3,3]</b> toluene (0.1 M), 80 °C, 1 hr  | <b>[AAA]</b> DCM (0.1 M), 4 °C<br><b>[3,3]</b> DCM (0.1 M), 40 °C, 1 hr     | <b>[AAA]</b> DCM (0.1 M), 4 °C<br><b>[3,3]</b> toluene (0.1 M), 50 °C, 1 hr |

### General procedure C.

Specific reaction conditions are outlined in Table S1.

Asymmetric allylic alkylation [AAA]: To an oven-dried Schlenk flask equipped with a stir bar,  $\text{Pd}_2(\text{dba})_3$  (2.5 mol%), (*S,S*)-DACH-phenyl Trost ligand (5 mol%), and alkylidenemalononitrile **1** (1 equiv.) were added, and the contents were placed under  $\text{N}_2$  atmosphere. Anhydrous DCM (0.5 M or 0.1 M) was added via syringe, and the solution was stirred for 15 minutes (solution turned from purple to yellow-brown). An allylic electrophile **rac-2** (2.5 equiv. or 2.2

equiv. with bicyclic nucleophiles) was added via syringe, and the contents were left to react overnight (16 – 18 hours) at an indicated temperature. For substrates **1a** – **1e** the reaction mixture was filtered through a silica plug and concentrated under reduced pressure.

Cope rearrangement [3,3]: The solvent switch to toluene (0.1 M) was performed where applicable and the mixture was heated at stirring at indicated temperature for indicated time. The desired product was isolated by silica gel column chromatography. Diastereomeric ratio (dr) was determined based on <sup>1</sup>H NMR and found to be more than 20:1 unless otherwise stated.

The racemic compounds were prepared under the same reaction conditions using corresponding allylic electrophiles (1-1.5 equiv.) and Pd(PPh<sub>3</sub>)<sub>4</sub> as a catalyst without additional use of ligand.

*Note:* absolute stereochemistry of compounds **4** was assigned via analogy to **4y** (determined by X-ray crystallography).

#### Compound 4a

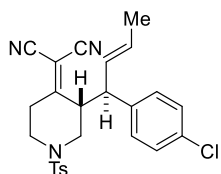

Prepared according to the General procedure C on 0.20 mmol scale from **1a** and **rac-2a** and obtained in 67% yield (62.8 mg, 0.13 mmol, er = 94:6) as a white solid; from **1a** and **rac-2a-Ac** with addition of K<sub>3</sub>PO<sub>4</sub> (3 equiv., 127.4 mg, 0.6 mmol) and obtained in 74% yield (69.2 mg, 0.15 mmol, er = 95:5); from **1a** and **rac-2a-Ac** with addition of Et<sub>3</sub>Pr<sub>2</sub>N (3 equiv., 69 mg, 0.6 mmol) and obtained in 55% yield (51.6 mg, 0.11 mmol, er = 97:3).

R<sub>f</sub> = 0.28 in 20% EtOAc in hexanes.

<sup>1</sup>H NMR (400 MHz, CDCl<sub>3</sub>) δ 7.53 (d, *J* = 8.3 Hz, 2H), 7.37 (d, *J* = 8.5 Hz, 2H), 7.33 – 7.27 (m, 4H), 5.63 – 5.46 (m, 2H), 4.17 – 4.07 (m, 1H), 3.86 – 3.77 (m, 1H), 3.57 (d, *J* = 12.1 Hz, 1H), 3.18 (d, *J* = 10.7 Hz, 1H), 2.98 (d, *J* = 14.9 Hz, 1H), 2.74 (ddd, *J* = 14.8, 12.4, 6.3 Hz, 1H), 2.41 (s, 3H), 2.36 – 2.21 (m, 1H), 2.15 (dd, *J* = 12.1, 3.2 Hz, 1H), 1.65 (d, *J* = 4.9 Hz, 3H).

<sup>13</sup>C NMR (101 MHz, CDCl<sub>3</sub>) δ 179.3, 144.6, 139.3, 133.5, 132.1, 130.1, 129.7, 129.5, 129.1, 128.9, 127.7, 111.3, 110.8, 86.7, 49.9, 48.8, 47.8, 46.7, 30.9, 21.6, 17.9.

HRMS (ESI-TOF): [M+Na]<sup>+</sup> calculated for C<sub>25</sub>H<sub>24</sub>ClN<sub>3</sub>O<sub>2</sub>S<sup>+</sup> 488.1170; found 488.1187.

HPLC: (Chiralpak AD-H, *i*-PrOH:hexanes = 5:95, flow rate = 0.5 mL/min, UV = 254 nm) t<sub>R1</sub> = 13.59 min (minor) and t<sub>R2</sub> = 15.50 min (major), er = 94:6.

#### Compound 4b

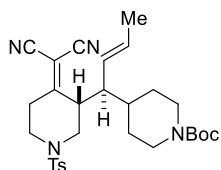

Prepared according to the General procedure C using **1a** and **rac-2b** on a 0.2 mmol scale and obtained in 81% yield (86.8 mg, 0.161 mmol, er = 99:1) as a white solid; on a 3 mmol scale the compound was obtained in 85% yield (1.38

g, 2.56 mmol, er = 98.3:1.7); on a 3 mmol scale with 0.5 mol% ligand and 0.25 mol% Pd<sub>2</sub>dba<sub>3</sub> loading, the compound was obtained in 69% yield (1.12 g, 2.08, er = 95:5).

R<sub>f</sub> = 0.30 in 30% EtOAc in hexanes.

<sup>1</sup>H NMR (400 MHz, CD<sub>3</sub>CN) δ 7.66 (d, *J* = 8.2 Hz, 2H), 7.42 (d, *J* = 8.2 Hz, 2H), 5.45 (dq, *J* = 15.2, 6.4 Hz, 1H), 5.14 – 5.02 (m, 1H), 4.09 (t, *J* = 16.4 Hz, 2H), 4.01 – 3.89 (m, 2H), 3.01 (d, *J* = 10.6 Hz, 1H), 2.81 (d, *J* = 14.9 Hz, 1H), 2.72 – 2.56 (m, 3H), 2.54 – 2.35 (m, 6H), 1.85 – 1.74 (m, 1H), 1.66 – 1.54 (m, 4H), 1.41 (s, 9H), 1.33 – 1.04 (m, 3H).

<sup>13</sup>C NMR (101 MHz, CD<sub>3</sub>CN) δ 181.9, 155.3, 145.4, 134.3, 130.9, 128.5, 127.2, 112.5, 112.2, 86.2, 79.6, 48.4, 47.8, 46.6, 44.3, 36.9, 31.2, 31.7, 28.6, 26.4, 21.6, 17.9.

HRMS (ESI-TOF): [M+Na]<sup>+</sup> calculated for C<sub>29</sub>H<sub>38</sub>NaN<sub>4</sub>O<sub>4</sub>S<sup>+</sup> 561.2506; found 561.2533.

HPLC (Chiralpak ID, *i*-PrOH:hexanes = 10:90, flow rate = 0.4 mL/min, UV = 254 nm) t<sub>R1</sub> = 47.97 min (minor) and t<sub>R2</sub> = 51.49 min (major), er = 99:1.

#### Compound 4c

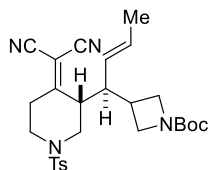

Prepared according to the General procedure C using **1a** and *rac*-**2c** and obtained in 76% yield (77.6 mg, 0.152 mmol) as a white solid.

R<sub>f</sub> = 0.20 in 30% EtOAc in hexanes.

<sup>1</sup>H NMR (400 MHz, CD<sub>3</sub>CN) δ 7.63 (d, *J* = 8.2 Hz, 2H), 7.42 (d, *J* = 8.2 Hz, 2H), 5.65 – 5.55 (m, 1H), 5.20 – 5.11 (m, 1H), 4.01 – 3.89 (m, 2H), 3.78 (ddd, *J* = 21.3, 17.9, 10.7 Hz, 3H), 3.66 – 3.58 (m, 1H), 2.88 – 2.65 (m, 5H), 2.42 (s, 3H), 2.38 – 2.29 (m, 2H), 1.66 (dd, *J* = 6.4, 1.4 Hz, 3H), 1.40 (s, 9H).

<sup>13</sup>C NMR (101 MHz, CD<sub>3</sub>CN) δ 180.8, 157.2, 145.5, 133.4, 131.8, 130.9, 126.6, 126.8, 112.5, 112.2, 86.5, 79.6, 53.5, 48.3, 47.1, 46.6, 46.3, 31.6, 31.2, 28.6, 21.5, 18.0.

HRMS (ESI-TOF): [M+Na]<sup>+</sup> calculated for C<sub>27</sub>H<sub>34</sub>NaN<sub>4</sub>O<sub>4</sub>S<sup>+</sup> 533.2193; found 533.2215.

HPLC: (Chiralpak ID, *i*-PrOH:hexanes = 20:80, flow rate = 1 mL/min, UV = 254 nm) t<sub>R1</sub> = 10.25 min (minor) and t<sub>R2</sub> = 18.16 min (major), er = 93:7.

#### Compound 4d

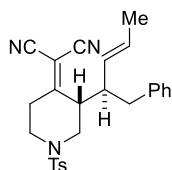

Prepared according to the General procedure C using **1a** and *rac*-**2d** on a 0.2 mmol scale and obtained in 72% yield (64.2 mg, 0.144 mmol) as a white solid.

R<sub>f</sub> = 0.38 in 20% EtOAc in hexanes.

**<sup>1</sup>H NMR (400 MHz, CDCl<sub>3</sub>)** δ 7.63 (d, *J* = 8.1 Hz, 2H), 7.32 (d, *J* = 8.1 Hz, 2H), 7.23 (d, *J* = 6.6 Hz, 2H), 7.15 (t, *J* = 8.6 Hz, 3H), 5.11 – 4.96 (m, 2H), 4.24 (d, *J* = 12.5 Hz, 1H), 4.10 – 4.00 (m, 1H), 3.18 (dd, *J* = 12.9, 2.5 Hz, 1H), 2.95 – 2.71 (m, 3H), 2.66 – 2.54 (m, 1H), 2.41 (s, 4H), 2.38 – 2.29 (m, 2H), 1.49 (d, *J* = 4.6 Hz, 3H).

**<sup>13</sup>C NMR (101 MHz, CDCl<sub>3</sub>)** δ 180.4, 144.5, 138.6, 132.9, 130.1, 129.8, 129.6, 128.5, 128.2, 127.5, 126.3, 111.2, 111.0, 85.7, 47.6, 47.0, 46.4, 45.9, 39.3, 31.1, 21.6, 17.7.

**HRMS (ESI-TOF):** [M+Na]<sup>+</sup> calculated for C<sub>26</sub>H<sub>27</sub>NaN<sub>3</sub>O<sub>2</sub>S<sup>+</sup> 468.1716; found 468.1732.

**HPLC:** (Chiralpak ID, *i*-PrOH:hexanes = 10:90, flow rate = 1 mL/min, UV = 254 nm) t<sub>R1</sub> = 8.58 min (major) and t<sub>R2</sub> = 11.48 min (major), er = 94:6.

#### Compound 4e

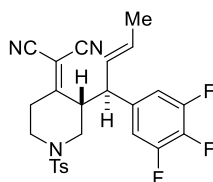

Prepared according to the General procedure C ([AAA] was carried at 4 °C) using **1a** and *rac*-**2e** on a 0.20 mmol scale and obtained in 77% yield (75.0 mg, 0.15 mmol) as a white solid.

R<sub>f</sub> = 0.41 in 20% EtOAc in hexanes.

**<sup>1</sup>H NMR (400 MHz, CDCl<sub>3</sub>)** δ 7.53 (d, *J* = 8.2 Hz, 2H), 7.30 (d, *J* = 8.2 Hz, 2H), 7.06 – 6.95 (m, 2H), 5.64 – 5.49 (m, 1H), 5.49 – 5.38 (m, 1H), 4.16 – 4.10 (m, 1H), 3.78 (t, *J* = 10.3 Hz, 1H), 3.55 (d, *J* = 12.3 Hz, 1H), 3.15 (d, *J* = 10.8 Hz, 1H), 2.99 (d, *J* = 15.0 Hz, 1H), 2.72 (ddd, *J* = 14.9, 12.3, 6.3 Hz, 1H), 2.41 (s, 3H), 2.36 – 2.27 (m, 1H), 2.20 (dd, *J* = 12.3, 3.1 Hz, 1H), 1.66 (dd, *J* = 6.4, 1.2 Hz, 3H).

**<sup>13</sup>C NMR (101 MHz, CDCl<sub>3</sub>)** δ 178.4, 151.5 (ddd, *J* = 251.5, 9.8, 3.8 Hz), 144.8, 139.3 (dt, *J* = 251.8, 15.3 Hz), 136.9 (q, *J* = 6.6 Hz), 132.1, 130.1, 130.0, 128.0, 127.6, 112.7 – 112.3 (m), 111.2, 110.6, 87.0, 49.6, 48.3, 47.7, 46.5, 30.8, 21.6, 17.9.

**<sup>19</sup>F NMR (377 MHz, CDCl<sub>3</sub>)** δ -132.7 (d, *J* = 20.6 Hz), -161.4 (t, *J* = 20.6 Hz).

**HRMS (ESI-TOF):** [M+Na]<sup>+</sup> calculated for C<sub>28</sub>H<sub>22</sub>NaN<sub>2</sub>O<sub>6</sub>S<sup>+</sup> 508.1277; found 508.1277.

**HPLC:** (Chiralpak AD-H, *i*-PrOH:hexanes = 2:98, flow rate = 0.8 mL/min, UV = 254 nm) t<sub>R1</sub> = 12.71 min (major) and t<sub>R2</sub> = 14.29 min (minor), er = 88.3:11.7.

#### Compound 4f

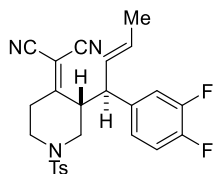

Prepared according to the General procedure C ([AAA] was carried at 4 °C) using **1a** and *rac*-**2f** on a 0.20 mmol scale and obtained in 76% yield (70.8 mg, 0.15 mmol) as a white solid.

R<sub>f</sub> = 0.37 in 20% EtOAc in hexanes.

**<sup>1</sup>H NMR (400 MHz, CDCl<sub>3</sub>)** δ 7.53 (d, *J* = 8.3 Hz, 2H), 7.30 (d, *J* = 8.0 Hz, 2H), 7.25 – 7.08 (m, 3H), 5.63 – 5.42 (m, 2H), 4.16 – 4.09 (m, 1H), 3.80 (t, *J* = 10.1 Hz, 1H), 3.60 – 3.54 (m, 1H), 3.16 (d, *J* = 10.7 Hz, 1H), 2.98 (d, *J* = 15.0 Hz, 1H), 2.79 – 2.68 (m, 1H), 2.41 (s, 3H), 2.30 (td, *J* = 12.0, 3.0 Hz, 1H), 2.18 (dd, *J* = 12.2, 3.2 Hz, 1H), 1.66 (dd, *J* = 6.2, 1.0 Hz, 3H).

**<sup>13</sup>C NMR (101 MHz, CDCl<sub>3</sub>)** δ 178.9, 150.7 (dd, *J* = 249.7, 12.6 Hz), 149.8 (dd, *J* = 248.6, 12.5), 144.7, 137.7 (t, *J* = 5.4, 3.8 Hz), 132.1, 130.1, 129.4, 128.6, 127.7, 124.7 (dd, *J* = 6.2, 3.6 Hz), 118.0 (d, *J* = 17.1), 117.0 (d, *J* = 17.4 Hz), 111.2, 110.7, 86.9, 49.6, 48.7, 47.7, 46.6, 30.9, 21.6, 17.9.

**<sup>19</sup>F NMR (377 MHz, CDCl<sub>3</sub>)** δ -136.0 (d, *J* = 21.2), -139.0 (d, *J* = 21.2 Hz).

**HRMS (ESI-TOF):** [M+Na]<sup>+</sup> calculated C<sub>25</sub>H<sub>23</sub>F<sub>2</sub>NaN<sub>3</sub>O<sub>2</sub>S<sup>+</sup> 490.1371; found 490.1381.

**HPLC:** (Chiralpak ID, *i*-PrOH:hexanes = 10:90, flow rate = 1 mL/min, UV = 254 nm) t<sub>R1</sub> = 5.82 min (minor) and t<sub>R2</sub> = 6.98 min (major), er = 93.7:6.3.

#### Compound 4g

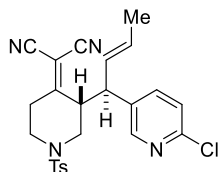

Prepared according to the General procedure C ([AAA] was carried at 4 °C) using **1a** and **rac-2g** on a 0.2 mmol scale and obtained in 69% yield (65.0 mg, 0.139 mmol) as a white solid.

R<sub>f</sub> = 0.26 in 30% EtOAc in hexanes.

**<sup>1</sup>H NMR (400 MHz, CDCl<sub>3</sub>)** δ 8.40 (d, *J* = 2.4 Hz, 1H), 7.66 (dd, *J* = 8.2, 2.5 Hz, 1H), 7.51 (d, *J* = 8.2 Hz, 2H), 7.35 (d, *J* = 8.2 Hz, 1H), 7.29 (d, *J* = 8.2 Hz, 2H), 5.67 – 5.54 (m, 1H), 5.54 – 5.43 (m, 1H), 4.18 – 4.07 (m, 1H), 3.88 (t, *J* = 10.3 Hz, 1H), 3.52 (d, *J* = 12.3 Hz, 1H), 3.20 (d, *J* = 10.8 Hz, 1H), 3.00 (d, *J* = 14.9 Hz, 1H), 2.81 – 2.68 (m, 1H), 2.40 (s, 3H), 2.38 – 2.27 (m, 1H), 2.20 (dd, *J* = 12.3, 3.1 Hz, 1H), 1.66 (d, *J* = 6.2 Hz, 3H).

**<sup>13</sup>C NMR (101 MHz, CDCl<sub>3</sub>)** δ 178.4, 150.7, 149.6, 144.7, 138.9, 135.4, 132.1, 130.3, 130.1, 127.9, 127.6, 124.8, 111.1, 110.6, 87.1, 48.2, 47.6, 47.2, 46.5, 30.8, 21.6, 17.9.

**HRMS (ESI-TOF):** [M+Na]<sup>+</sup> calculated for C<sub>24</sub>H<sub>23</sub>ClNaN<sub>4</sub>O<sub>2</sub>S<sup>+</sup> 489.1122; found 489.1132.

**HPLC:** (Chiralpak AD-H, *i*-PrOH:hexanes = 20:80, flow rate = 1 mL/min, UV = 254 nm) t<sub>R1</sub> = 4.10 min (minor) and t<sub>R2</sub> = 6.12 min (major), er = 92.1:7.9.

#### Compound 4h

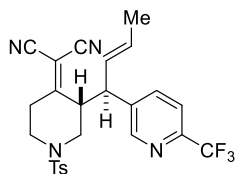

Prepared according to the General procedure C using **1a** and **rac-2h** on a 0.20 mmol scale and obtained in 82% yield (82.0 mg, 0.16 mmol) as a light-yellow solid.

R<sub>f</sub> = 0.19 in 30% EtOAc in hexanes.



**<sup>1</sup>H NMR (400 MHz, CDCl<sub>3</sub>)** δ 8.75 (d, *J* = 1.9, 1H), 7.90 (dd, *J* = 8.1, 1.9 Hz, 1H), 7.72 (d, *J* = 8.1 Hz, 1H), 7.51 (d, *J* = 8.3 Hz, 2H), 7.29 (d, *J* = 8.3 Hz, 2H), 5.65 (dq, *J* = 14.9, 6.2 Hz, 1H), 5.54 (ddd, *J* = 15.0, 9.8, 1.3 Hz, 1H), 4.19 – 4.12 (m, 1H), 3.99 (t, *J* = 10.3 Hz, 1H), 3.50 (d, *J* = 12.4 Hz, 1H), 3.28 (d, *J* = 10.8 Hz, 1H), 3.02 (d, *J* = 15.0 Hz, 1H), 2.76 (ddd, *J* = 14.9, 12.3, 6.3 Hz, 1H), 2.43 – 2.30 (m, 4H), 2.23 (dd, *J* = 12.4, 3.1 Hz, 1H), 1.68 (dd, *J* = 6.2, 1.2 Hz, 3H).

**<sup>13</sup>C NMR (101 MHz, CDCl<sub>3</sub>)** δ 178.1, 149.9, 147.5 (q, *J* = 34.9 Hz), 144.8, 139.8, 137.7, 132.1, 130.9, 130.2, 127.5 (d, *J* = 6.1 Hz), 122.9, 121.58 (q, *J* = 274.1 Hz) 120.9 (q, *J* = 2.6), 120.2, 111.1, 110.6, 87.3, 48.1, 47.8, 46.5, 30.8, 21.6, 17.9.

**<sup>19</sup>F NMR (377 MHz, CDCl<sub>3</sub>)** δ -67.8.

**HRMS (ESI-TOF):** [M+Na]<sup>+</sup> calculated for C<sub>25</sub>H<sub>23</sub>F<sub>3</sub>NaN<sub>4</sub>O<sub>2</sub>S<sup>+</sup> 523.1386; found 523.1410.

**HPLC:** (Chiralpak AD-H, *i*-PrOH:hexanes = 10:90, flow rate = 1 mL/min, UV = 254 nm) t<sub>R1</sub> = 5.88 min (minor) and t<sub>R2</sub> = 9.13 min (major), er = 88.3:11.7.

#### Compound 4i

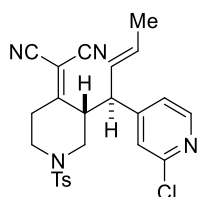

Prepared according to the General procedure C from **1a** and **rac-2i** on a 0.4 mmol scale and obtained in 73% yield (156.8 mg, 0.29 mmol, er = 85:15) as a white solid; from **1a** and **rac-2i-Ac** on 0.20 mmol scale with addition of Et/Pr<sub>2</sub>N (3 equiv., 69 mg, 0.6 mmol) and obtained in 66% yield (76.2 mg, 0.132 mmol, er = 95:5).

R<sub>f</sub> = 0.27 in 30% EtOAc in hexanes.

**<sup>1</sup>H NMR (400 MHz, CDCl<sub>3</sub>)** δ 8.40 (d, *J* = 5.1 Hz, 1H), 7.52 (d, *J* = 8.2 Hz, 2H), 7.34 – 7.27 (m, 3H), 7.24 (d, *J* = 5.1 Hz, 1H), 5.68 – 5.57 (m, 1H), 5.51 – 5.41 (m, 1H), 4.17 – 4.08 (m, 1H), 3.85 (t, *J* = 10.4 Hz, 1H), 3.51 (d, *J* = 12.4 Hz, 1H), 3.22 (d, *J* = 10.8 Hz, 1H), 3.00 (d, *J* = 14.9 Hz, 1H), 2.78 – 2.67 (m, 1H), 2.40 (s, 3H), 2.38 – 2.26 (m, 1H), 2.21 (dd, *J* = 12.4, 3.0 Hz, 1H), 1.67 (d, *J* = 6.3 Hz, 3H).

**<sup>13</sup>C NMR (101 MHz, CDCl<sub>3</sub>)** δ 178.0, 152.8, 152.5, 150.6, 144.8, 132.1, 131.0, 130.2, 127.6, 127.1, 123.8, 122.5, 111.1, 110.6, 87.3, 49.4, 47.7(1), 47.6(8), 46.5, 30.8, 21.6, 18.0.

**HRMS (ESI-TOF):** [M+Na]<sup>+</sup> Calculated for C<sub>24</sub>H<sub>23</sub>ClNaN<sub>4</sub>O<sub>2</sub>S<sup>+</sup> 489.1122; found 489.1130.

**HPLC:** (Chiralpak ID, *i*-PrOH:hexanes = 10:90, flow rate = 1 mL/min, UV = 254 nm) t<sub>R1</sub> = 13.71 min (minor) and t<sub>R2</sub> = 11.48 min (major), er = 85:15.

#### Compound 4j

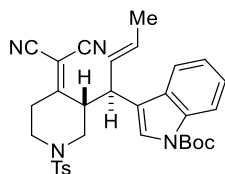

Prepared according to the General procedure C from **1a** and **rac-2k-Ac** on 0.20 mmol scale with addition of  $K_3PO_4$  (3 equiv., 127.4 mg, 0.6 mmol) and obtained in 67% yield (76.2 mg, 0.134 mmol) as a light-yellow solid. *Note*: [3,3]-Cope rearrangement occurred at room temperature and was complete upon completion of the [AAA].

$R_f$  = 0.33 in 20% EtOAc in hexanes.

$^1H$  NMR (400 MHz,  $CDCl_3$ )  $\delta$  8.25 (d,  $J$  = 8.1 Hz, 1H), 7.77 (d,  $J$  = 7.7 Hz, 1H), 7.71 (s, 1H), 7.51 (d,  $J$  = 8.3 Hz, 2H), 7.36 (td,  $J$  = 9.2, 8.2, 0.9 Hz, 1H), 7.32 – 7.23 (m, 3H), 5.81 (dd,  $J$  = 14.8, 10.8 Hz, 1H), 5.68 – 5.55 (m, 1H), 4.17 – 4.03 (m, 2H), 3.73 (d,  $J$  = 12.0 Hz, 1H), 3.55 (d,  $J$  = 10.9 Hz, 1H), 3.01 (d,  $J$  = 14.9 Hz, 1H), 2.81 (ddd,  $J$  = 14.3, 12.1, 6.0 Hz, 1H), 2.39 (s, 3H), 2.30 (td,  $J$  = 11.9, 3.0 Hz, 1H), 2.16 (dd,  $J$  = 12.0, 3.2 Hz, 1H), 1.70 – 1.62 (m, 12H).

$^{13}C$  NMR (101 MHz,  $CDCl_3$ )  $\delta$  179.9, 149.5, 144.3, 136.4, 132.2, 129.9, 129.2, 127.8, 127.7, 127.6, 125.5, 122.8, 119.9, 118.2, 115.7, 111.5, 110.9, 86.6, 83.8, 48.2, 46.7, 46.1, 43.0, 30.8, 28.2, 21.5, 17.8.

HRMS (ESI-TOF):  $[M+NH_4]^+$  calculated for  $C_{32}H_{38}N_5O_4S^+$  588.2639; found 588.2636.

HPLC: (Chiralpak AD-H, *i*-PrOH:hexanes = 2.5:97.5, flow rate = 0.5 mL/min, UV = 254 nm)  $t_{R1}$  = 8.58 min (major) and  $t_{R2}$  = 11.48 min (major), er = 93.4:6.6.

#### Compound 4k

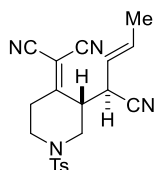

Prepared according to the General procedure C using **1a** and **rac-2l** on a 0.4 mmol scale with the following modifications: upon completion of AAA the alkylation product was purified using silica gel column chromatography ( $R_f$  = 0.41 in 40% EtOAc in hexanes), dissolved in toluene (0.1 M) and heated at 110 °C for 4 hours to provide the desired product in 71% yield (108 mg, 0.284 mmol) as a colorless oil.

*Note*: compound 4k was unstable on silica gel and alumina, and purification attempts by column chromatography led to epimerization/racemization.

$R_f$  = 0.32 in 30% EtOAc in hexanes.

$^1H$  NMR (400 MHz,  $CDCl_3$ )  $\delta$  7.66 (d,  $J$  = 8.3 Hz, 2H), 7.36 (d,  $J$  = 8.0 Hz, 2H), 5.92 (dq,  $J$  = 13.1, 6.6 Hz, 1H), 5.24 (ddd,  $J$  = 15.2, 8.4, 1.7 Hz, 1H), 4.29 – 4.21 (m, 1H), 4.13 (ddt,  $J$  = 9.2, 4.2, 2.1 Hz, 1H), 3.88 – 3.78 (m, 1H), 3.30 (d,  $J$  = 10.7 Hz, 1H), 2.99 (d,  $J$  = 15.2 Hz, 1H), 2.71 – 2.57 (m, 1H), 2.54 (dd,  $J$  = 12.9, 3.0 Hz, 1H), 2.46 – 2.36 (m, 4H), 1.76 (dd,  $J$  = 6.6, 1.4 Hz, 3H).

$^{13}C$  NMR (101 MHz,  $CDCl_3$ )  $\delta$  174.4, 144.9, 134.9, 132.5, 130.3, 127.7, 120.0, 117.6, 110.4(3), 110.3(6), 88.8, 48.6, 46.4, 45.5, 35.7, 30.7, 21.7, 17.9.

HRMS (ESI-TOF):  $[M+Na]^+$  calculated for  $C_{20}H_{20}NaN_4O_2S^+$  403.1199; found 403.1206.

HPLC: (Chiralpak AD-H, *i*-PrOH:hexanes = 10:90, flow rate = 1 mL/min, UV = 254 nm)  $t_{R1}$  = 11.95 min (major) and  $t_{R2}$  = 22.02 min (major), er = 70.5:29.5.

#### Compound 4l

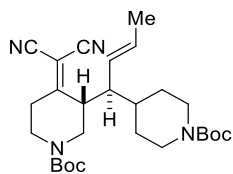

Prepared according to the General procedure C using **1b** and *rac-2b* on a 0.20 mmol scale and obtained in 79% yield (77.2 mg, 0.16 mmol) as a light-yellow oil.

$R_f$  = 0.17 in 20% EtOAc in hexanes.

$^1\text{H NMR}$  (500 MHz, DMSO-*d*<sub>6</sub>, 353 K)  $\delta$  5.40 (dq,  $J$  = 13.0, 6.3 Hz, 1H), 5.10 – 5.01 (m, 1H), 4.35 – 4.20 (m, 2H), 4.10 – 3.96 (m, 2H), 3.01 – 2.84 (m, 3H), 2.73 – 2.61 (m, 3H), 2.44 (ddd,  $J$  = 14.5, 11.9, 6.6 Hz, 1H), 2.16 – 2.08 (m, 1H), 1.97 – 1.87 (m, 1H), 1.68 – 1.59 (m, 4H), 1.45 (s, 9H), 1.39 (s, 9H), 1.28 – 1.14 (m, 2H), 1.07 (qd,  $J$  = 12.4, 4.1 Hz, 1H).

$^{13}\text{C NMR}$  (126 MHz, DMSO-*d*<sub>6</sub>, 353 K)  $\delta$  183.1, 153.5, 153.3, 128.5, 126.2, 111.3, 111.1, 83.4, 79.3, 78.1, 46.9, 44.03, 43.96, 42.7, 35.9, 30.8, 30.3, 27.7(2), 27.6(6), 25.2, 16.8.

**HRMS (ESI-TOF):**  $[\text{M}+\text{Na}]^+$  calculated for  $\text{C}_{27}\text{H}_{40}\text{NaN}_4\text{O}_4^+$  507.2942; found 507.2934.

**HPLC:** (Chiralpak AD-H, *i*-PrOH:hexanes = 5:95, flow rate = 0.5 mL/min, UV = 254 nm)  $t_{R1}$  = 6.82 min (major) and  $t_{R2}$  = 8.42 min (minor), er = 99:1.

#### Compound 4m

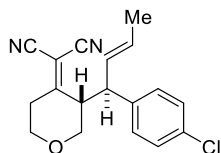

Prepared according to the General procedure C from **1c** and *rac-2a* on a 0.4 mmol scale and obtained in 68% yield (85.1 mg, 0.272 mmol) as a white solid.

$R_f$  = 0.40 in 20% EtOAc in hexanes.

$^1\text{H NMR}$  (400 MHz,  $\text{CDCl}_3$ ) 7.33 (d,  $J$  = 8.4 Hz, 2H), 7.20 (d,  $J$  = 8.4 Hz, 2H), 5.60 – 5.44 (m, 2H), 4.28 (dd,  $J$  = 11.2, 6.8 Hz, 1H), 3.78 – 3.64 (m, 2H), 3.46 (td,  $J$  = 11.6, 2.6 Hz, 1H), 3.27 (dd,  $J$  = 11.9, 2.5 Hz, 1H), 3.09 (d,  $J$  = 10.9 Hz, 1H), 2.88 (d,  $J$  = 14.6 Hz, 1H), 2.78 – 2.65 (m, 1H), 1.66 (d,  $J$  = 4.8 Hz, 3H).

$^{13}\text{C NMR}$  (101 MHz,  $\text{CDCl}_3$ )  $\delta$  180.7, 139.6, 133.3, 129.7, 129.5, 129.4, 128.6, 111.6, 111.2, 85.5, 68.8, 68.3, 50.0, 49.8, 32.3, 17.9.

**HRMS (ESI-TOF):**  $[\text{M}-\text{H}]^-$  calculated for  $\text{C}_{18}\text{H}_{16}\text{ClN}_2\text{O}^-$  311.0957; found 311.0970.

**HPLC:** (Chiralpak AD-H, *i*-PrOH:hexanes = 5:95, flow rate = 1 mL/min, UV = 254 nm)  $t_{R1}$  = 3.07 min (minor) and  $t_{R2}$  = 3.53 min (major), er = 91.9:8.1.

#### Compound 4n

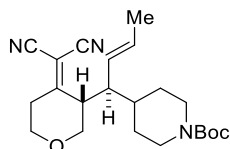

Prepared according to the General procedure C using **1c** and **rac-2b** on a 0.2 mmol scale and obtained in 90% yield (69.4 mg, 0.18 mmol) as a white solid.

$R_f$  = 0.33 in 30% EtOAc in hexanes.

$^1\text{H NMR}$  (400 MHz,  $\text{CDCl}_3$ )  $\delta$  5.46 – 5.33 (m, 1H), 5.06 (dd,  $J$  = 14.2, 11.4 Hz, 1H), 4.18 (dd,  $J$  = 11.6, 5.4 Hz, 4H), 3.47 – 3.33 (m, 2H), 2.91 (d,  $J$  = 10.5 Hz, 1H), 2.80 – 2.43 (m, 5H), 1.77 – 1.62 (m, 4H), 1.56 (d,  $J$  = 13.5 Hz, 1H), 1.42 (s, 11H), 1.29 – 1.14 (m, 1H).

$^{13}\text{C NMR}$  (101 MHz,  $\text{CDCl}_3$ )  $\delta$  181.8, 154.8, 130.1, 126.3, 111.4, 111.2, 84.6, 79.5, 68.6, 68.1, 47.6, 45.2, 44.1, 37.1, 32.5, 31.2, 28.5, 26.0, 17.9.

**HRMS (ESI-TOF):**  $[\text{M}+\text{Na}]^+$  calculated for  $\text{C}_{22}\text{H}_{31}\text{NaN}_3\text{O}_3^+$  408.2258; found 408.2261.

**HPLC:** (Chiralpak IA, *i*-PrOH:hexanes = 2.5:97.5, flow rate = 0.25 mL/min, UV = 254 nm)  $t_{R1}$  = 23.75 min (minor) and  $t_{R2}$  = 26.70 min (major), er = 99:1.

#### Compound 4o

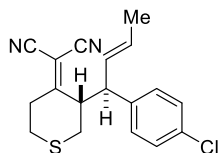

Prepared according to the General procedure C from **1d** and **rac-2a** on a 0.2 mmol scale and obtained in 67% yield (44 mg, 0.13 mmol) as a white solid.

$R_f$  = 0.54 in 20% EtOAc in hexanes.

$^1\text{H NMR}$  (400 MHz,  $\text{CDCl}_3$ )  $\delta$  7.33 (d,  $J$  = 8.5 Hz, 2H), 7.22 (d,  $J$  = 8.5 Hz, 2H), 5.60 – 5.46 (m, 2H), 4.20 – 4.09 (m, 1H), 3.44 (dt,  $J$  = 10.9, 3.1 Hz, 1H), 3.29 – 3.20 (m, 1H), 2.96 – 2.86 (m, 1H), 2.86 – 2.66 (m, 3H), 2.35 (dt,  $J$  = 14.3, 2.7 Hz, 1H), 1.65 (d,  $J$  = 4.9 Hz, 3H).

$^{13}\text{C NMR}$  (101 MHz,  $\text{CDCl}_3$ )  $\delta$  182.7, 139.4, 133.3, 129.5, 129.4, 129.2, 128.8, 111.5, 111.2, 86.2, 49.5, 48.3, 33.2, 32.7, 30.8, 18.0.

**HRMS (ESI-TOF):**  $[\text{M}-\text{H}]^-$  calculated for  $\text{C}_{18}\text{H}_{16}\text{ClN}_2\text{S}^-$  327.0728; found 327.0729.

**HPLC:** (Chiralpak AD-H, *i*-PrOH:hexanes = 1:99 flow rate = 0.3 mL/min, UV = 254 nm)  $t_{R1}$  = 14.88 min (minor) and  $t_{R2}$  = 16.59 min (major), er = 92:8.

#### Compound 4p

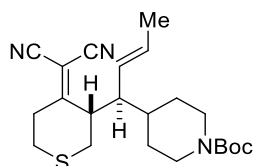

Prepared according to the General procedure C using **1d** and **rac-2b** on a 0.2 mmol scale and obtained in 86% yield (68.8 mg, 0.17 mmol) as a light-yellow solid.

$R_f$  = 0.42 in 20% EtOAc in hexanes.

**<sup>1</sup>H NMR (400 MHz, CDCl<sub>3</sub>)** δ 5.43 (dq, *J* = 15.0, 6.4 Hz, 1H), 5.12 – 4.99 (m, 1H), 4.31 – 4.02 (m, 3H), 3.27 (d, *J* = 10.5 Hz, 1H), 3.12 (dt, *J* = 13.9, 2.7 Hz, 1H), 2.95 – 2.51 (m, 8H), 1.69 – 1.50 (m, 5H), 1.45 – 1.30 (m, 10H), 1.29 – 1.15 (m, 1H).

**<sup>13</sup>C NMR (101 MHz, CD<sub>3</sub>CN)** δ 185.5, 155.3, 130.6, 127.6, 112.7, 112.5, 85.6, 79.6, 48.1, 46.8, 44.6, 36.3, 33.6, 32.7, 32.0, 30.8, 28.6, 26.2, 18.0.

**HRMS (ESI-TOF):** [M+Na]<sup>+</sup> calculated for C<sub>22</sub>H<sub>31</sub>NaN<sub>3</sub>O<sub>2</sub>S<sup>+</sup> 424.2029; found 424.2048.

**HPLC:** (Chiralpak IA, *i*-PrOH:hexanes = 2.5:97.5, flow rate = 0.25 mL/min, UV = 254 nm) t<sub>R1</sub> = 21.96 min (minor) and t<sub>R2</sub> = 23.46 min (major), er = 98.8:1.2.

#### Compound 4q

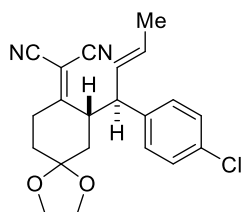

Prepared according to the General procedure C from **1e** and **rac-2a** on a 0.2 mmol scale and obtained in 57% yield (42.0 mg, 0.114 mmol) as a white solid.

R<sub>f</sub> = 0.28 in 20% EtOAc in hexanes.

**<sup>1</sup>H NMR (400 MHz, CDCl<sub>3</sub>)** δ 7.25 (d, *J* = 8.5 Hz, 2H), 7.11 (d, *J* = 8.5 Hz, 2H), 5.48 – 5.30 (m, 2H), 4.06 – 3.64 (m, 5H), 3.34 – 3.25 (m, 1H), 2.96 – 2.98 (m, 1H), 2.65 (td, *J* = 14.4, 5.2 Hz, 1H), 2.05 – 1.93 (m, 1H), 1.67 (td, *J* = 14.0, 4.4 Hz, 1H), 1.62 – 1.47 (m, 5H).

**<sup>13</sup>C NMR (101 MHz, CDCl<sub>3</sub>)** δ 184.0, 140.6, 132.8, 131.1, 129.6, 129.2, 127.9, 112.0, 111.6, 106.7, 85.6, 65.2, 64.4, 51.3, 47.9, 36.1, 35.4, 29.1, 17.9.

**HRMS (ESI-TOF):** [M-H]<sup>-</sup> calculated for C<sub>21</sub>H<sub>20</sub>ClN<sub>2</sub>O<sub>2</sub><sup>-</sup> 367.1219; found 367.1235.

**HPLC:** (Chiralpak IA, *i*-PrOH:hexanes = 5:95, flow rate = 0.5 mL/min, UV = 254 nm) t<sub>R1</sub> = 6.63 min (major) and t<sub>R2</sub> = 7.34 min (minor), er = 93.6:6.4.

#### Compound 4r

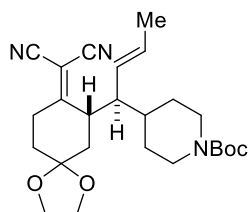

Prepared according to the General procedure C using **1e** and **rac-2b** and on a 0.2 mmol scale and obtained in 55% yield (49.0 mg, 0.11 mmol) as a white solid.

R<sub>f</sub> = 0.17 in 30% EtOAc in hexanes.

**<sup>1</sup>H NMR (400 MHz, CD<sub>3</sub>CN)** δ 5.37 (dq, *J* = 15.0, 6.4 Hz, 1H), 5.15 – 5.03 (m, 1H), 4.14 – 3.82 (m, 6H), 3.09 (dd, *J* = 11.1, 5.7 Hz, 1H), 2.84 – 2.52 (m, 5H), 1.99 (ddd, *J* = 10.3, 5.4, 2.5 Hz, 1H), 1.91 – 1.80 (m, 1H), 1.82 – 1.67 (m, 2H), 1.63 (dd, *J* = 6.4, 1.6 Hz, 3H), 1.55 (d, *J* = 14.1 Hz, 1H), 1.41 (s, 10H), 1.29 – 1.02 (m, 3H).

**<sup>13</sup>C NMR (101 MHz, CD<sub>3</sub>CN)** δ 186.9, 155.4, 130.0, 128.8, 113.1, 112.9, 107.5, 85.0, 79.6, 65.9, 65.0, 49.9, 44.4, 37.1, 36.1, 35.3, 32.1, 30.0, 28.6, 26.2, 17.9.

**HRMS (ESI-TOF):** [M+Na]<sup>+</sup> calculated for C<sub>25</sub>H<sub>35</sub>NaN<sub>3</sub>O<sub>4</sub><sup>+</sup> 464.2520; found 464.2535.

**HPLC:** (Chiralpak AD-H, *i*-PrOH:hexanes = 5:95, flow rate = 1 mL/min, UV = 254 nm) t<sub>R1</sub> = 4.73 min (minor) and t<sub>R2</sub> = 11.48 min (major), er = 98.5:1.5.

#### Compound 4u

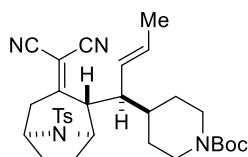

Prepared according to the General procedure C from **1g** and **rac-2b** on a 0.40 mmol scale and obtained in 37% yield (0.084 g, 0.15 mmol) as a white solid.

R<sub>f</sub> = 0.38 in 30% EtOAc in hexanes.

**<sup>1</sup>H NMR (400 MHz, CD<sub>3</sub>CN)** δ 7.78 (d, *J* = 8.2 Hz, 2H), 7.40 (d, *J* = 8.2 Hz, 2H), 5.36 (dq, *J* = 15.2, 6.3 Hz, 1H), 5.17 – 5.04 (m, 1H), 4.49 (br, 1H), 4.37 (d, *J* = 7.4 Hz, 1H), 4.06 (m, 2H), 2.89 (d, *J* = 10.0 Hz, 1H), 2.77 (dd, *J* = 15.2, 1.6 Hz, 1H), 2.71 – 2.46 (m, 3H), 2.44 – 2.33 (m, 4H), 1.80 (br, 1H), 1.68 – 1.50 (m, 5H), 1.47 – 1.32 (m, 12H), 1.17 – 1.01 (m, 3H).

**<sup>13</sup>C NMR (101 MHz, CD<sub>3</sub>CN)** δ 181.8, 155.4, 145.6, 137.5, 131.0, 130.6, 128.4, 127.5, 112.8, 112.3, 89.6, 79.6, 59.2, 58.6, 52.8, 50.3, 44.6 (br), 41.4, 37.0, 32.0, 29.3, 28.9, 28.6, 26.6, 21.6, 17.8.

**HRMS (ESI<sup>-</sup>):** [M-H]<sup>-</sup> calculated for C<sub>31</sub>H<sub>39</sub>N<sub>4</sub>O<sub>4</sub>S<sup>-</sup> 563.2698; found 563.2709.

**HPLC** (Chiralpak AD-H, *i*-PrOH:hexanes = 6:94, flow rate = 1 mL/min, UV = 254 nm) t<sub>R1</sub> = 8.49 min (major) and t<sub>R2</sub> = 9.94 min (minor), er = 95:5.

#### Compound 4v

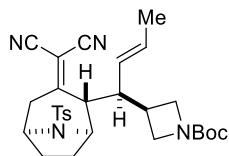

Prepared according to the General procedure C from **1g** and **rac-2c** on a 0.20 mmol scale and obtained in 39% yield (0.042 g, 0.08 mmol) as a white solid.

R<sub>f</sub> = 0.29 in 30% EtOAc in hexanes.

**<sup>1</sup>H NMR (400 MHz, CDCl<sub>3</sub>)** δ 7.72 (d, *J* = 8.3 Hz, 2H), 7.32 (d, *J* = 8.3 Hz, 2H), 5.51 (dq, *J* = 15.2, 6.3 Hz, 1H), 5.31 (dd, *J* = 15.2, 8.1 Hz, 1H), 4.46 (br, 1H), 4.24 (d, *J* = 7.4 Hz, 1H), 3.90 (m, 2H), 3.73 (dd, *J* = 8.9, 5.9 Hz, 1H), 3.65 (dd, *J* = 8.4,

5.6 Hz, 1H), 3.09 – 2.96 (m, 1H), 2.81 (dd,  $J = 15.1, 2.7$  Hz, 1H), 2.72 – 2.56 (m, 3H), 2.44 (s, 3H), 1.71 (dd,  $J = 6.3, 1.6$  Hz, 3H), 1.60 (m, 1H), 1.50 – 1.39 (m, 10H), 1.38 – 1.23 (m, 2H).

$^{13}\text{C}$  NMR (101 MHz,  $\text{CDCl}_3$ )  $\delta$  179.3, 156.3, 144.8, 136.2, 131.9, 130.2, 127.4, 125.0, 111.3, 110.9, 89.4, 79.6, 58.5, 57.4, 53.5, 51.9, 50.1, 46.7, 40.8, 29.4, 28.8, 28.5, 28.2, 21.7, 18.1.

HRMS (ESI<sup>-</sup>):  $[\text{M} - \text{H}]^-$  calculated for  $\text{C}_{29}\text{H}_{35}\text{N}_4\text{O}_4\text{S}^-$  535.2384; found 535.2395.

HPLC (Chiralpak AD-H, *i*-PrOH:hexanes = 10:90, flow rate = 1 mL/min, UV = 254 nm)  $t_{\text{R}1} = 7.79$  min (minor) and  $t_{\text{R}2} = 17.76$  min (major), er = 95:5.

#### Compound 4w

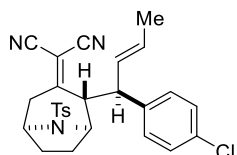

Prepared according to the General procedure C from **1g** and *rac*-**2a** on a 1.0 mmol scale and obtained in 42% yield (0.209 g, 0.42 mmol) as a white solid.

$R_f = 0.32$  in 20% EtOAc in hexanes.

$^1\text{H}$  NMR (400 MHz,  $\text{CDCl}_3$ )  $\delta$  7.66 (d,  $J = 8.2$  Hz, 2H), 7.35 (s, 4H), 7.28 (d,  $J = 8.2$  Hz, 2H), 5.56 – 5.43 (m, 2H), 4.52 (br, 1H), 3.99 – 3.90 (m, 1H), 3.89 – 3.78 (m, 1H), 3.11 (d,  $J = 9.6$  Hz, 1H), 2.90 (dd,  $J = 15.2, 1.6$  Hz, 1H), 2.74 (dd,  $J = 15.2, 3.8$  Hz, 1H), 2.43 (s, 3H), 1.63 (d,  $J = 4.8$  Hz, 3H), 1.47 – 1.15 (m, 4H).

$^{13}\text{C}$  NMR (101 MHz,  $\text{CDCl}_3$ )  $\delta$  179.5, 144.7, 139.9, 136.1, 133.2, 130.2, 129.9, 129.6, 129.3, 128.5, 127.5, 111.7, 110.9, 90.0, 58.5, 57.5(0), 57.4(8), 51.3, 41.1, 28.9, 27.8, 21.7, 17.8.

HRMS (ESI<sup>-</sup>):  $[\text{M} - \text{H}]^-$  calculated for  $\text{C}_{27}\text{H}_{25}\text{ClN}_3\text{O}_2\text{S}^-$  490.1361; found 490.1368.

HPLC (Chiralpak AD-H, *i*-PrOH:hexanes = 4:96, flow rate = 1 mL/min, UV = 254 nm)  $t_{\text{R}1} = 7.25$  min (minor) and  $t_{\text{R}2} = 10.51$  min (major), er = 94:6.

#### Compound 4x

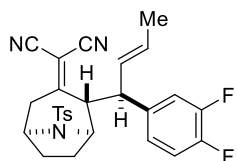

Prepared according to the General procedure C from **1g** and *rac*-**2f** on a 0.40 mmol scale and obtained in 30% yield (0.060 g, 0.12 mmol) as a white solid.

$R_f = 0.50$  in 30% EtOAc in hexanes.

$^1\text{H}$  NMR (400 MHz,  $\text{CDCl}_3$ )  $\delta$  7.66 (d,  $J = 8.2$  Hz, 2H), 7.29 (d,  $J = 8.2$  Hz, 2H), 7.20 – 7.10 (m, 3H), 5.60 – 5.37 (m, 2H), 4.54 (br, 1H), 3.94 (br, 1H), 3.80 (dd, appears as t,  $J = 9.5$  Hz, 1H), 3.08 (d,  $J = 11.5$  Hz, 1H), 2.91 (dd,  $J = 15.7, 1.9$  Hz, 1H), 2.73 (dd,  $J = 15.3, 3.9$  Hz, 1H), 2.43 (s, 3H), 1.64 (d,  $J = 4.9$  Hz, 3H), 1.45 – 1.20 (m, 4H).

**<sup>13</sup>C NMR (101 MHz, CDCl<sub>3</sub>)** δ 179.2, 150.5 (dd, *J* = 248.7, 12.6 Hz), 149.6 (dd, *J* = 248.7, 12.6 Hz), 144.8, 138.3 (dd, appears as t, *J* = 4.4 Hz), 136.0, 130.2, 129.4, 128.8, 127.5, 124.5 (dd, *J* = 6.2, 3.4 Hz), 117.9 (d, *J* = 17.3 Hz), 117.4 (d, *J* = 17.3 Hz), 111.7, 110.9, 90.2, 58.5, 57.5, 57.3, 51.1, 41.1, 28.9, 27.9, 21.7, 17.8.

**<sup>19</sup>F NMR (377 MHz, CDCl<sub>3</sub>)** δ -136.3 (d, *J* = 21.3 Hz), -139.6 (d, *J* = 21.3 Hz).

**HRMS (DART<sup>+</sup>):** [M + H]<sup>+</sup> calculated for C<sub>27</sub>H<sub>26</sub>F<sub>2</sub>N<sub>3</sub>O<sub>2</sub>S<sup>+</sup> 494.1708; found 494.1693. Calculated for C<sub>27</sub>H<sub>29</sub>F<sub>2</sub>N<sub>4</sub>O<sub>2</sub>S [M + NH<sub>4</sub>]<sup>+</sup> 511.1974; found 511.1960.

**HPLC** (Chiralpak ID, *i*-PrOH:hexanes = 5:95, flow rate = 0.2 mL/min, UV = 280 nm) t<sub>R1</sub> = 43.70 min (minor) and t<sub>R2</sub> = 59.03 min (major), er = 94:6.

#### Compound 4y

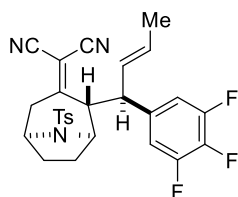

Prepared according to the General procedure C from **1g** and **rac-2e** on a 0.40 mmol scale and obtained in 37% yield (0.063 g, 0.12 mmol) as a white solid.

R<sub>f</sub> = 0.27 in 20% EtOAc in hexanes

**<sup>1</sup>H NMR (600 MHz, CDCl<sub>3</sub>)** δ 7.67 (d, *J* = 8.2 Hz, 2H), 7.30 (d, *J* = 8.2 Hz, 2H), 7.06 – 6.96 (m, 2H), 5.50 (dq, *J* = 15.2, 6.4 Hz, 1H), 5.40 (ddd, *J* = 15.2, 10.1, 1.7 Hz, 1H), 4.56 – 4.51 (m, 1H), 3.94 – 3.90 (m, 1H), 3.77 (dd, appears as t, *J* = 10.1 Hz, 1H), 3.05 (d, *J* = 10.1 Hz, 1H), 2.94 – 2.87 (m, 1H), 2.72 (dd, *J* = 15.3, 3.9 Hz, 1H), 2.44 (s, 3H), 1.64 (d, *J* = 6.4 Hz, 3H), 1.45 – 1.32 (m, 3H), 1.29 – 1.24 (m, 1H).

**<sup>13</sup>C NMR (151 MHz, CDCl<sub>3</sub>)** δ 178.6, 151.5 (dd, *J* = 251.0, 3.8 Hz), 151.4 (dd, *J* = 251.0, 3.8 Hz), 144.9, 138.9 (dt, *J* = 251.9, 15.1 Hz), 137.6 (q, *J* = 6.6 Hz), 135.9, 130.3, 129.4, 128.7, 127.5, 112.8 – 112.4 (m), 111.6, 110.8, 90.4, 58.5, 57.5, 56.9, 51.1, 41.1, 28.9, 27.9, 21.7, 17.8.

**<sup>19</sup>F NMR (377 MHz, CDCl<sub>3</sub>)** δ -132.96 (d, *J* = 20.6 Hz), -161.93 (t, *J* = 20.7 Hz).

**HRMS (ESI<sup>-</sup>):** [M - H]<sup>-</sup> calculated for C<sub>27</sub>H<sub>23</sub>F<sub>3</sub>N<sub>3</sub>O<sub>2</sub>S<sup>-</sup> 510.1475; found 510.1469.

**HPLC** (Chiralpak ID, *i*-PrOH:hexanes = 10:90, flow rate = 1 mL/min, UV = 254 nm) t<sub>R1</sub> = 4.82 min (minor) and t<sub>R2</sub> = 6.07 min (major), er = 86:14.

#### Compound 4z

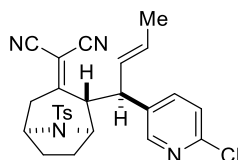

Prepared according to the General procedure C from **1g** and **rac-2g** on a 0.40 mmol scale and obtained in 38% yield (0.075 g, 0.15 mmol) as a white solid.

R<sub>f</sub> = 0.39 in 30% EtOAc in hexanes



**<sup>1</sup>H NMR (400 MHz, CDCl<sub>3</sub>)** δ 8.46 (d, *J* = 2.6 Hz, 1H), 7.72 (dd, *J* = 8.2, 2.6 Hz, 1H), 7.64 (d, *J* = 8.2 Hz, 2H), 7.35 (d, *J* = 8.2 Hz, 1H), 7.28 (d, *J* = 8.2 Hz, 2H), 5.61 – 5.40 (m, 2H), 4.53 (br, 1H), 4.01 – 3.79 (m, 2H), 3.10 (d, *J* = 10.4 Hz, 1H), 2.92 (dd, *J* = 15.3, 1.6 Hz, 1H), 2.75 (dd, *J* = 15.3, 3.8 Hz, 1H), 2.42 (s, 3H), 1.64 (d, *J* = 4.9 Hz, 3H), 1.44 – 1.28 (m, 3H), 1.27 – 1.18 (m, 1H).

**<sup>13</sup>C NMR (101 MHz, CDCl<sub>3</sub>)** δ 178.6, 150.6, 149.9, 144.9, 139.0, 135.9, 135.9, 130.2, 129.7, 128.7, 127.4, 124.7, 111.6, 110.8, 90.4, 58.4, 57.5, 56.9, 48.7, 41.1, 28.8, 27.9, 21.7, 17.8.

**HRMS (ESI<sup>+</sup>):** [M + H]<sup>+</sup> calculated for C<sub>26</sub>H<sub>26</sub>ClN<sub>4</sub>O<sub>2</sub>S<sup>+</sup> 493.1460; found 493.1464. [M + Na]<sup>+</sup> Calculated for C<sub>27</sub>H<sub>25</sub>ClN<sub>4</sub>O<sub>2</sub>SNa<sup>+</sup> 515.1279; found 515.1263.

**HPLC** (Chiralpak ID, *i*-PrOH: hexanes = 20:80, flow rate = 1 mL/min, UV = 254 nm) t<sub>R1</sub> = 9.70 min (minor) and t<sub>R2</sub> = 15.23 min (major), er = 92:8.

#### Compound 4aa

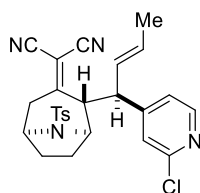

Prepared according to the General procedure C from **1g** and **rac-2i** on a 0.20 mmol scale and obtained in 33% yield (0.032 g, 0.07 mmol) as a white solid.

R<sub>f</sub> = 0.32 in 30% EtOAc in hexanes

**<sup>1</sup>H NMR (400 MHz, CDCl<sub>3</sub>)** δ 8.39 (d, *J* = 5.1 Hz, 1H), 7.65 (d, *J* = 8.3 Hz, 2H), 7.38 – 7.26 (m, 4H), 5.55 (dq, *J* = 15.0, 6.3 Hz, 1H), 5.43 (ddd, *J* = 15.0, 9.9, 1.5 Hz, 1H), 4.54 (br, 1H), 3.96 – 3.78 (m, 2H), 3.12 (d, *J* = 10.4 Hz, 1H), 2.92 (dd, *J* = 15.3, 1.6 Hz, 1H), 2.73 (dd, *J* = 15.3, 3.9 Hz, 1H), 2.43 (s, 3H), 1.65 (dd, *J* = 6.3, 1.5 Hz, 3H), 1.44 – 1.20 (m, 4H).

**<sup>13</sup>C NMR (101 MHz, CDCl<sub>3</sub>)** δ 178.2, 153.4, 152.3, 150.5, 144.9, 135.9, 130.4, 130.3, 127.9, 127.4, 124.1, 122.5, 111.6, 110.7, 90.6, 58.5, 57.5, 56.2, 51.0, 41.1, 28.8, 27.9, 21.8, 17.9.

**HRMS (ESI<sup>+</sup>):** [M + H]<sup>+</sup> calculated for C<sub>26</sub>H<sub>26</sub>ClN<sub>4</sub>O<sub>2</sub>S<sup>+</sup> 493.1460; found 493.1467. [M + Na]<sup>+</sup> calculated for C<sub>27</sub>H<sub>25</sub>ClN<sub>4</sub>O<sub>2</sub>SNa<sup>+</sup> 515.1279; found 515.1273.

**HPLC** (Chiralpak ID, *i*-PrOH:hexanes = 20:80, flow rate = 1 mL/min, UV = 254 nm) t<sub>R1</sub> = 6.89 min (minor) and t<sub>R2</sub> = 9.01 min (major), er = 82:18.

#### Compound 4bb

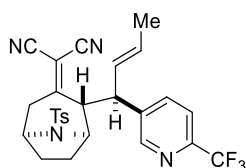

Prepared according to the General procedure C from **1g** and **rac-2h** on a 0.40 mmol scale and obtained in 40% yield (0.085 g, 0.16 mmol) as a white solid.

R<sub>f</sub> = 0.37 in 30% EtOAc in hexanes.

**<sup>1</sup>H NMR (400 MHz, CDCl<sub>3</sub>)** δ 8.81 (d, *J* = 2.2 Hz, 1H), 7.96 (dd, *J* = 8.1, 2.2 Hz, 1H), 7.72 (d, *J* = 8.1 Hz, 1H), 7.63 (d, *J* = 8.3 Hz, 2H), 7.32 – 7.24 (m, overlapped with solvent residual peak at 7.26, 2H), 5.66 – 5.44 (m, 2H), 4.54 (br, 1H), 4.02 (dd, appears as t, *J* = 9.9 Hz, 1H), 3.87 (d, *J* = 4.9 Hz, 1H), 3.18 (d, *J* = 10.3 Hz, 1H), 2.94 (dd, *J* = 15.3, 2.1 Hz, 1H), 2.77 (dd, *J* = 15.3, 3.9 Hz, 1H), 2.42 (s, 3H), 1.65 (d, *J* = 6.0 Hz, 3H), 1.43 – 1.18 (m, 4H).

**<sup>13</sup>C NMR (101 MHz, CDCl<sub>3</sub>)** δ 178.3, 150.1, 147.3 (q, *J* = 34.8 Hz), 144.9, 140.3, 137.8, 135.8, 130.3, 128.3, 127.4, 121.7 (q, *J* = 273.6 Hz), 120.8 (q, *J* = 2.5 Hz), 111.6, 110.7, 90.6, 58.4, 57.5, 56.6, 49.3, 41.1, 28.8, 27.8, 21.7, 17.8.

**<sup>19</sup>F NMR (377 MHz, CDCl<sub>3</sub>)** δ -67.7.

**HRMS (ESI<sup>-</sup>):** [M - H]<sup>-</sup> calculated for C<sub>27</sub>H<sub>24</sub>F<sub>3</sub>N<sub>4</sub>O<sub>2</sub>S<sup>-</sup> 525.1578; found 525.1595.

**HPLC** (Chiralpak ID, *i*-PrOH:hexanes = 20:80, flow rate = 1 mL/min, UV = 254 nm) t<sub>R1</sub> = 5.18 min (minor) and t<sub>R2</sub> = 7.16 min (major), er = 79:21.

#### Compound 4cc

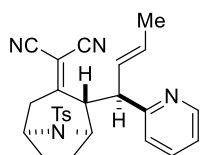

Prepared according to the General procedure C from **1g** and **rac-2j** on a 0.40 mmol scale and obtained in 34% yield (0.065 g, 0.14 mmol) as a white solid.

R<sub>f</sub> = 0.34 in 30% EtOAc in hexanes.

**<sup>1</sup>H NMR (400 MHz, CDCl<sub>3</sub>)** δ 8.60 (d, *J* = 4.9 Hz, 1H), 7.63 (ddd, appears as dt, *J* = 7.7, 1.5 Hz, 2H), 7.58 (d, *J* = 8.2 Hz, 2H), 7.25 – 7.21 (m, 3H), 7.17 (ddd, *J* = 7.6, 4.9, 1.5 Hz, 1H), 5.60 – 5.41 (m, 2H), 4.50 (br, 1H), 3.99 – 3.85 (m, 3H), 2.90 (dd, *J* = 15.1, 2.8 Hz, 1H), 2.79 (dd, *J* = 15.1, 3.8 Hz, 1H), 2.41 (s, 3H), 1.63 (d, *J* = 4.6 Hz, 3H), 1.51 – 1.29 (m, 4H).

**<sup>13</sup>C NMR (101 MHz, CDCl<sub>3</sub>)** δ 179.7, 159.4, 149.7, 144.4, 136.7, 136.3, 130.5, 130.1, 128.2, 127.4, 125.3, 122.1, 111.4, 89.9, 58.9, 57.6, 54.1, 53.2, 40.9, 29.0, 27.9, 21.7, 17.9.

**HRMS (ESI<sup>+</sup>):** [M + H]<sup>+</sup> calculated for C<sub>26</sub>H<sub>27</sub>N<sub>4</sub>O<sub>2</sub>S<sup>+</sup> 459.1849; found 459.1865. [M + Na]<sup>+</sup> calculated for C<sub>26</sub>H<sub>26</sub>N<sub>4</sub>O<sub>2</sub>SNa<sup>+</sup> 481.1669; found 481.1669.

**HPLC** (Chiralpak ID, *i*-PrOH:hexanes = 20:80, flow rate = 1 mL/min, UV = 254 nm) t<sub>R1</sub> = 8.10 min (minor) and t<sub>R2</sub> = 10.20 min (major), er = 70:30.

#### Compound 4dd

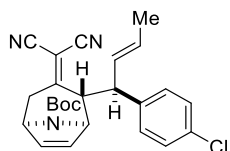

Prepared according to the General procedure C from **1h** and **rac-2a** on a 1.0 mmol scale and obtained in 43% yield (0.188 g, 0.43 mmol, er = 92:8) as a white solid; on 7.4 mmol using 1 mol% Pd<sub>2</sub>dba<sub>3</sub> and 2 mol% (*S,S*)-DACH-phenyl Trost ligand and obtained in 41% yield (1.33 g, 3.1 mmol, er = 86:14).

R<sub>f</sub> = 0.45 in 20% EtOAc in hexanes.

**<sup>1</sup>H NMR (400 MHz, DMSO-*d*<sub>6</sub>, 354 K)** δ 7.43 (d, *J* = 8.5 Hz, 2H), 7.35 (d, *J* = 8.5 Hz, 2H), 6.30 – 6.22 (m, 2H), 5.54 – 5.42 (m, 2H), 4.96 – 4.90 (m, 1H), 4.41 – 4.37 (m, 1H), 3.77 – 3.68 (m, 1H), 3.34 (dd, *J* = 10.5, 2.1 Hz, 1H), 2.91 (d, *J* = 3.0 Hz, 2H), 1.59 (d, *J* = 4.8 Hz, 3H), 1.32 (s, 9H).

**<sup>13</sup>C NMR (101 MHz, DMSO-*d*<sub>6</sub>, 354 K)** δ 181.1, 139.7, 134.8, 133.7, 131.7, 131.2, 129.4, 128.3, 126.6, 111.5, 110.9, 89.2, 79.6, 59.1, 57.7, 50.7, 50.2, 35.2, 27.4, 16.7.

**HRMS (ESI<sup>-</sup>):** [M - H]<sup>-</sup> calculated for C<sub>25</sub>H<sub>25</sub>ClN<sub>3</sub>O<sub>2</sub><sup>-</sup> 434.1641; found 434.1646.

**HPLC** (Chiralpak IA, *i*-PrOH:hexanes = 2:98, flow rate = 0.4 mL/min, UV = 254 nm) t<sub>R1</sub> = 9.44 min (major) and t<sub>R2</sub> = 11.18 min (minor), er = 92:8.

### Compound 4ee

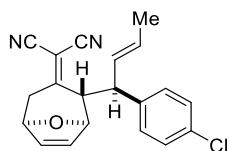

Prepared according to the General procedure C ([AAA] was conducted at room temperature, 3 hours) from **1h** and **rac-2a** on a 0.4 mmol scale and obtained in 50% yield (0.068 g, 0.2 mmol, 9:1 to 20:1 dr) as a white solid.

R<sub>f</sub> = 0.41 in 20% EtOAc in hexanes.

**<sup>1</sup>H NMR (600 MHz, CDCl<sub>3</sub>)** δ 7.35 (d, *J* = 8.4 Hz, 2H), 7.25 (d, *J* = 8.4 Hz, 2H), 6.21 (dd, *J* = 6.1, 1.8 Hz, 1H), 6.12 (dd, *J* = 6.1, 1.9 Hz, 1H), 5.71 – 5.62 (m, 1H), 5.51 – 5.42 (m, 1H), 5.04 – 4.96 (m, 1H), 4.34 (s, 1H), 3.82 (dd, appears as t, *J* = 10.6 Hz, 1H), 3.04 (d, *J* = 10.6 Hz, 1H), 2.89 – 2.77 (m, 2H), 1.67 (dd, *J* = 6.4, 1.6 Hz, 3H).

**<sup>13</sup>C NMR (101 MHz, CDCl<sub>3</sub>)** δ 179.6, 139.6, 133.6, 133.3, 132.9, 131.0, 129.5, 129.4, 128.4, 111.8, 111.2, 90.3, 78.9, 78.5, 52.5, 51.2, 35.8, 17.8.

**HRMS (ESI<sup>-</sup>):** [M - H]<sup>-</sup> calculated for C<sub>20</sub>H<sub>16</sub>ClN<sub>2</sub>O<sup>-</sup> 335.0957; found 335.0966.

**HPLC** (Chiralpak AD-H, *i*-PrOH:hexanes = 1:99, flow rate = 1 mL/min, UV = 254 nm) t<sub>R1</sub> = 6.51 min (minor) and t<sub>R2</sub> = 9.23 (major), er = 89:11.

### Reductive Cope rearrangement

#### General procedure D.

To an oven-dried 1-dram vial equipped with a stir bar Pd<sub>2</sub>(dba)<sub>3</sub> (2.5 mol%), (*S,S*)-DACH phenyl Trost ligand (5 mol%) and alkylidenemalononitrile **1f** (1 equiv., 60.3 mg, 0.40 mmol) were added, and the contents were placed under N<sub>2</sub> atmosphere. Anhydrous DCM (0.5 M, 8 mL) was added via syringe, and the solution was stirred for 15 minutes (solution turned from purple to yellow-brown). An allylic electrophile **rac-2** (2.5 equiv.) was added via syringe, and the reaction was stirred at room temperature overnight (16 hours). Solvent was evaporated, and the crude material and Hantzsch ester (3 equiv., 304 mg, 1.2 mmol) were dissolved in toluene (0.1 M, 4 mL) and heated at the indicated temperature for the indicated time. The reaction mixture was concentrated under reduced pressure, redissolved in ethanol (0.05 M, 8 mL), and KOH (8.9 equiv., 606 mg, 10.8 mmol) was added. This mixture was heated at 75 °C for 1 hour to hydrolyze the pyridine byproduct, diluted with EtOAc (20 mL) and washed with saturated NaHCO<sub>3</sub> (2 × 15 mL) followed by brine, dried with anhydrous Na<sub>2</sub>SO<sub>4</sub>, filtered, and concentrated under reduced pressure. The desired compound was isolated using silica gel column chromatography with EtOAc in hexanes as an eluent.

### Compound 5a

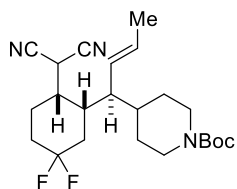

Prepared according to the General procedure D (reduction with Hantzsch ester occurred at 110 °C after 8 hours) and obtained in 60% yield (101.0 mg, 0.24 mmol) as a white solid.

$R_f$  = 0.32 in 20% EtOAc in hexanes.

$^1\text{H NMR}$  (400 MHz,  $\text{CDCl}_3$ )  $\delta$  5.65 – 5.50 (m, 1H), 5.18 (dd,  $J$  = 14.8, 10.5 Hz, 1H), 4.25 – 4.02 (m, 3H), 2.73 – 2.54 (m, 2H), 2.38 – 1.84 (m, 9H), 1.70 (dd,  $J$  = 24.6, 6.4 Hz, 4H), 1.44 (s, 12H), 1.18 – 1.03 (m, 1H).

$^{13}\text{C NMR}$  (101 MHz,  $\text{CDCl}_3$ )  $\delta$  154.7, 130.9, 129.8, 128.7, 128.0, 122.6 (t,  $J$  = 244.3, 238.4 Hz) 114.0, 112.5, 79.5, 48.5, 43.9, 36.5, 36.3, 36.1 (d,  $J$  = 8.4 Hz), 31.9 (ddd,  $J$  = 332.5, 25.1, 24.1 Hz), 31.0, 28.4, 25.1, 24.6 (d,  $J$  = 8.2 Hz), 21.3, 18.1.

$^{19}\text{F NMR}$  (377 MHz,  $\text{CDCl}_3$ )  $\delta$  = -89.8 (d,  $J$  = 240.9 Hz), -98.6 (d,  $J$  = 17.1 Hz).

**HRMS (ESI-TOF):**  $[\text{M}-\text{H}]^-$  calculated for  $\text{C}_{23}\text{H}_{32}\text{F}_2\text{N}_3\text{O}_2^-$  420.2468; found 420.2477.

**HPLC:** (based on alkylidenemalonitrile **4s**, which was prepared using **0**) (Chiralpak AD-H, *i*-PrOH:hexanes = 2.5:97.5, flow rate = 1 mL/min, UV = 254 nm)  $t_{R1}$  = 5.71 min (major) and  $t_{R2}$  = 6.77 min (minor), er = 98.5:1.5.

### Compound 5b

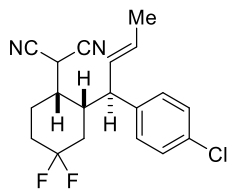

Prepared according to the General procedure D (reduction with Hantzsch ester occurred at 80 °C after 4 hours) and obtained in 49% yield (68.6 mg, 0.20 mmol) as a white solid.

$R_f$  = 0.34 in 10% EtOAc in hexanes.

$^1\text{H NMR}$  (400 MHz,  $\text{CDCl}_3$ )  $\delta$  7.32 (d,  $J$  = 8.2 Hz, 2H), 7.09 (d,  $J$  = 8.2 Hz, 2H), 5.77 – 5.55 (m, 2H), 4.24 (d,  $J$  = 6.6 Hz, 1H), 3.24 (t,  $J$  = 10.3 Hz, 1H), 2.38 – 2.20 (m, 2H), 2.26 (d,  $J$  = 6.1 Hz, 2H), 2.18 – 1.83 (m, 3H), 1.74 – 1.59 (m, 4H).

$^{13}\text{C NMR}$  (101 MHz,  $\text{CDCl}_3$ )  $\delta$  140.5, 132.9, 132.0, 129.5, 129.0, 128.7, 122.1 (t,  $J$  = 241.7, 240.9 Hz), 113.7, 112.5 (d,  $J$  = 160.5 Hz), 50.6, 40.1 (t,  $J$  = 5.8, 4.4 Hz), 37.3, 33.8 (t,  $J$  = 24.8 Hz), 30.4 (t,  $J$  = 25.5 Hz), 24.3 (t,  $J$  = 6.4, 5.5 Hz), 22.6, 18.1.

$^{19}\text{F NMR}$  (377 MHz,  $\text{CDCl}_3$ )  $\delta$  -90.2 (d,  $J$  = 242.0 Hz).

**HRMS (ESI-TOF):**  $[\text{M}-\text{H}]^-$  calculated for  $\text{C}_{19}\text{H}_{18}\text{ClF}_2\text{N}_2^-$  347.1132; found 347.1142.

**HPLC:** (based on alkylidenemalonitrile **4t**, which was prepared using **0**) (Chiralpak AD-H, *i*-PrOH:hexanes = 1:99, flow rate = 0.5 mL/min, UV = 254 nm)  $t_{R1}$  = 8.52 min (minor) and  $t_{R2}$  = 10.01 min (major), er = 95.5:4.5.

## Reactivity of *meso*-4-*tert*-butylcyclohexylidenemalononitrile

### Compound 6ff

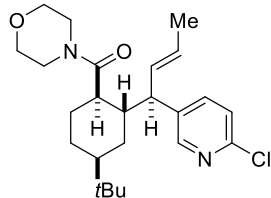

To an oven dried Schlenk flask equipped with Pd<sub>2</sub>(dba)<sub>3</sub> (0.005 g, 2.5 mol%), (*S,S*)-DACH phenyl Trost ligand (0.007 g, 5 mol%), alkylidenemalononitrile **1g** (1 equiv., 0.040 g, 0.2 mmol), and a stir bar under N<sub>2</sub> atmosphere, anhydrous DCM (2 mL, 0.1 M) was added via syringe, and the contents were left at stirring. After 15 minutes electrophile *rac*-**2g** (2.5 equiv., 0.121 g, 0.5 mmol) was added via syringe, and the reaction mixture was stirred at room temperature overnight. The contents of the flask were transferred to a 20-dram vial, solvent was removed under reduced pressure, the residue was redissolved in toluene and heated at 60 °C for 2 hours. Purification on column chromatography afforded a mixture of α-alkylated adduct iso-**3ff** and Cope rearrangement product **4ff** (0.035 g, calc. 1:2 [AAA]:[3,3], 0.06 mmol of [3,3]). To the resulted mixture in a 20-dram vial toluene (1 mL) and methanol (1mL) were added, the vial was placed on an ice-water bath, and NaBH<sub>4</sub> (2 equiv., 0.005 g, 0.12 mmol) was added in one portion. The mixture was stirred at 0 °C for 30 min., quenched with water, diluted with saturated aqueous NH<sub>4</sub>Cl, and extracted with EtOAc (2x). The combined organic layers were washed with brine, dried over anhydrous Na<sub>2</sub>SO<sub>4</sub>, filtered, and concentrated under reduced pressure. The crude residue was placed in a conical vial followed by the addition of K<sub>2</sub>CO<sub>3</sub> (2 equiv., 0.017 g, 0.12 mmol), and the vial was sealed with rubber septum. Under N<sub>2</sub> atmosphere, MeCN (1 mL) was added via syringe, and the reaction mixture was saturated with O<sub>2</sub> and kept under O<sub>2</sub> atmosphere (balloon). Morpholine (2 equiv., 0.010 mL, 0.12 mmol) was added via syringe at stirring, and the reaction was allowed to proceed overnight at room temperature. The reaction mixture was filtered through a celite plug, the solvent was evaporated under reduced pressure, and the crude residue was purified by silica gel column chromatography using EtOAc in hexanes as an eluent to provide the desired product in overall 14% yield (0.012 g, 0.03 mmol) as a colorless oil.

R<sub>f</sub> = 0.30 in 40% EtOAc in hexanes.

<sup>1</sup>H NMR (400 MHz, CD<sub>3</sub>CN) δ 8.24 (d, *J* = 2.5 Hz, 1H), 7.63 (dd, *J* = 8.2, 2.5 Hz, 1H), 7.34 (d, *J* = 8.2 Hz, 1H), 5.62 (dq, *J* = 15.1, 6.1 Hz, 1H), 5.56 – 5.47 (m, 1H), 3.71 – 3.38 (m, 9H), 2.94 – 2.86 (m, 1H), 2.24 – 2.17 (m, 1H), 1.75 – 1.65 (m, 2H), 1.63 (dd, *J* = 6.1, 1.3 Hz, 3H), 1.59 – 1.46 (m, 2H), 1.45 – 1.32 (m, 1H), 1.25 – 1.12 (m, 1H), 1.06 – 0.96 (m, 1H), 0.62 (s, 9H).

<sup>13</sup>C NMR (151 MHz, CD<sub>3</sub>CN) δ 175.4, 150.4, 149.5, 140.0, 139.4, 134.3, 128.6, 125.1, 67.5, 48.6, 47.2, 42.7, 41.1, 40.6, 36.5, 32.9, 27.3, 25.3, 24.5, 23.8, 17.9.

HRMS (ESI<sup>+</sup>): [M + H]<sup>+</sup> calculated for C<sub>24</sub>H<sub>36</sub>ClN<sub>2</sub>O<sub>2</sub><sup>+</sup> 419.2460; found 419.2456.

HPLC: (Chiralpak IA, *i*-PrOH:hexanes = 10:90, flow rate = 1.0 mL/min, UV = 254 nm) t<sub>R1</sub> = 5.21 min (major) and t<sub>R2</sub> = 16.79 min (minor), er = 88:12.

### Conjugate reduction of alkylidenemalononitriles **4**

#### General procedure E.

An alkylidenemalononitrile **4** (1 equiv.) was dissolved in MeOH (0.1 M) and THF (0.1 M) and cooled to 0 °C in an ice-water bath. NaBH<sub>4</sub> (3 equiv.) was added, and the reaction was allowed to stir warming to room temperature. Upon

completion per TLC (1-2 hours) the reaction was quenched with water until the solution became opaque (approx. 0.05 M) and transferred to a separatory funnel. The mixture was extracted with dichloromethane (3 x 10 mL). The combined organic layers were washed with brine, dried with anhydrous Na<sub>2</sub>SO<sub>4</sub>, filtered, and concentrated under reduced pressure. The desired product was isolated by silica gel column chromatography with EtOAc in hexanes as an eluent unless otherwise stated.

### Compound SI-3

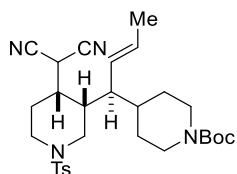

Prepared according to the General procedure E from **4b** on a 0.20 mmol scale and after aqueous work-up obtained in 94% yield (102 mg, 0.19 mmol) as a white solid without further purification.

$R_f$  = 0.21 in 20% EtOAc in hexanes

**<sup>1</sup>H NMR (400 MHz, CD<sub>3</sub>CN)**  $\delta$  7.65 (d,  $J$  = 8.3 Hz, 2H), 7.42 (d,  $J$  = 8.0 Hz, 2H), 5.57 (dq,  $J$  = 15.5, 6.4 Hz, 1H), 5.29 (ddd,  $J$  = 15.4, 10.2, 1.7 Hz, 1H), 4.18 (d,  $J$  = 10.7 Hz, 1H), 4.07 (t,  $J$  = 14.7 Hz, 2H), 3.79 – 3.63 (m, 2H), 2.76 – 2.56 (m, 2H), 2.43 (s, 4H), 2.35 (ddd,  $J$  = 13.5, 9.6, 3.2 Hz, 2H), 2.21 (tt,  $J$  = 10.7, 3.8 Hz, 1H), 2.17 – 2.10 (m, 1H, overlapped with residual water peak), 1.98 – 1.95 m, 1H, overlapped with residual NMR solvent peak), 1.92 – 1.79 (m, 2H), 1.69 (dd,  $J$  = 6.4, 1.6 Hz, 3H), 1.55 (d,  $J$  = 14.7 Hz, 1H), 1.41 (s, 9H), 1.31 – 1.15 (m, 2H), 1.07 (qd,  $J$  = 12.7, 4.2 Hz, 1H).

**<sup>13</sup>C NMR (101 MHz, CD<sub>3</sub>CN)**  $\delta$  155.4, 145.2, 133.7, 131.4, 130.7, 128.7, 114.5, 113.9, 79.6, 49.7, 46.5, 44.6, 41.9, 36.8, 36.7, 31.7, 28.6, 27.8, 26.5, 25.6, 21.5, 18.1.

**HRMS (ESI-TOF):** [M+Na]<sup>+</sup> calculated for C<sub>29</sub>H<sub>40</sub>N<sub>4</sub>NaO<sub>4</sub>S 563.2662; found 563.2676.

### Compound SI-4

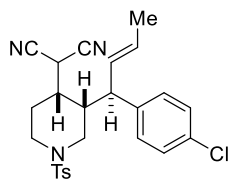

Prepared according to the General procedure E from **4a** on a 0.2 mmol scale and obtained in 81% yield (76.2 mg, 0.163 mmol) as a white solid.

$R_f$  = 0.34 in 20% EtOAc in hexanes.

**<sup>1</sup>H NMR (400 MHz, CDCl<sub>3</sub>)**  $\delta$  7.51 (d,  $J$  = 8.0 Hz, 2H), 7.34 (d,  $J$  = 8.3 Hz, 2H), 7.28 (d,  $J$  = 8.0 Hz, 2H), 7.20 (d,  $J$  = 8.3 Hz, 2H), 5.78 – 5.65 (m, 2H), 4.33 (d,  $J$  = 11.5 Hz, 1H), 3.97 (d,  $J$  = 11.8 Hz, 1H), 3.88 – 3.79 (m, 1H), 3.45 – 3.36 (m, 1H), 2.41 (m, 4H), 2.36 – 2.26 (m, 1H), 2.21 – 2.09 (m, 1H), 2.06 (dd,  $J$  = 12.0, 2.7 Hz, 1H), 2.01 – 1.91 (m, 2H), 1.69 (d,  $J$  = 4.3 Hz, 3H).

**<sup>13</sup>C NMR (101 MHz, CDCl<sub>3</sub>)**  $\delta$  144.2, 140.8, 133.0, 132.1, 132.0, 129.9, 129.4, 129.3, 129.2, 127.8, 112.6, 112.0, 49.8, 47.5, 46.5, 39.8, 27.3, 24.5, 21.7, 18.2.

**HRMS (DART-TOF, 470 °C):** [M+NH<sub>4</sub>]<sup>+</sup> calculated for C<sub>25</sub>H<sub>30</sub>ClN<sub>4</sub>O<sub>2</sub>S 485.1773; found 485.1794.

### Compound SI-5

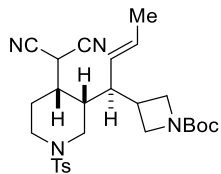

Prepared according to the General procedure E from **4c** on a 0.11 mmol scale and obtained in 93% yield (53.6 mg, 0.10 mmol) as a white solid.

$R_f$  = 0.2 in 30% EtOAc in hexanes.

$^1\text{H NMR}$  (400 MHz,  $\text{CD}_3\text{CN}$ )  $\delta$  7.63 (d,  $J$  = 8.3 Hz, 2H), 7.42 (d,  $J$  = 8.0 Hz, 2H), 5.74 (dq,  $J$  = 15.2, 6.4 Hz, 1H), 5.44 – 5.32 (m, 1H), 4.17 (d,  $J$  = 10.7 Hz, 1H), 3.89 (t,  $J$  = 8.0 Hz, 1H), 3.79 (t,  $J$  = 8.4 Hz, 1H), 3.63 (q,  $J$  = 8.0 Hz, 3H), 3.52 – 3.43 (m, 2H), 2.96 (dt,  $J$  = 12.6, 6.5 Hz, 1H), 2.57 – 2.39 (m, 4H), 2.31 (d,  $J$  = 12.1 Hz, 1H), 2.25 – 2.13 (m, 1H), 2.07 – 1.97 (m, 1H), 1.94 – 1.80 (m, 2H), 1.73 (dd,  $J$  = 6.4, 1.5 Hz, 3H), 1.40 (s, 9H).

$^{13}\text{C NMR}$  (101 MHz,  $\text{CD}_3\text{CN}$ )  $\delta$  157.2, 145.3, 133.1, 132.4, 130.8, 130.2, 128.8, 114.4, 113.9, 79.5, 49.7, 46.5, 42.3, 41.5, 38.7, 30.7, 28.6, 27.6, 25.8, 21.5, 18.3.

**HRMS (ESI-TOF):**  $[\text{M}+\text{Na}]^+$  calculated for  $\text{C}_{27}\text{H}_{36}\text{NaN}_4\text{O}_4\text{S}^+$  535.2349; found 535.2366.

### Compound SI-6

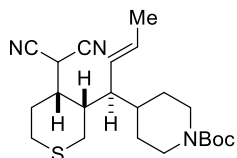

Prepared according to the General procedure E from **4p** on a 0.15 mmol scale and obtained in 91% yield (54.6 mg, 0.14 mmol) as a white solid.

$R_f$  = 0.32 in 20% EtOAc in hexanes.

$^1\text{H NMR}$  (400 MHz,  $\text{CD}_3\text{CN}$ )  $\delta$  5.59 (dq,  $J$  = 15.4, 6.4 Hz, 1H), 5.31 (ddq,  $J$  = 15.4, 10.4, 1.7 Hz, 1H), 4.19 (d,  $J$  = 10.2 Hz, 1H), 4.10 – 3.96 (m, 2H), 2.90 – 2.58 (m, 7H), 2.39 – 2.21 (m, 2H), 2.03 (ddd,  $J$  = 10.3, 7.1, 4.5 Hz, 2H), 1.77 – 1.60 (m, 4H), 1.58 – 1.48 (m, 1H), 1.40 (s, 9H), 1.31 – 1.18 (m, 2H), 1.08 (qd,  $J$  = 12.6, 4.3 Hz, 1H).

$^{13}\text{C NMR}$  (101 MHz,  $\text{CD}_3\text{CN}$ )  $\delta$  185.5, 155.3, 130.6, 127.6, 112.7, 112.5, 85.6, 79.6, 48.1, 44.6, 36.3, 33.6, 32.7, 32.0, 30.8, 28.6, 26.2, 18.0.

**HRMS (DART-TOF, 400 °C):**  $[\text{M}+\text{NH}_4]^+$  calculated for  $\text{C}_{22}\text{H}_{37}\text{N}_4\text{O}_2\text{S}^+$  424.2029; found 424.2048.

Conjugate reduction of alkylidenemalononitrile **4dd**.

### Compound SI-7

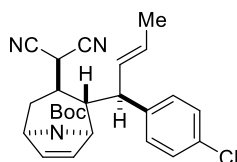

The solution of **4dd** (1 equiv., 0.218 g, 0.5 mmol) in DMPU (2.5 mL) and MeOH (2.5 mL) was cooled to 0 °C in an ice-water bath. NaBH<sub>4</sub> (0.057 g, 3 equiv.) was slowly added at stirring and the reaction vessel was removed from the ice-water bath. The reaction mixture was stirred for 1 hour, then slowly quenched with water, diluted with 2 M HCl solution and brine, and extracted with EtOAc (5x). The combined organic layers were washed with brine, dried over anhydrous Na<sub>2</sub>SO<sub>4</sub>, filtered, and concentrated under reduced pressure. The crude residue was purified by silica gel column chromatography using EtOAc in hexanes as eluent to provide the desired product in 52% yield (0.114 g, 0.26 mmol) as a white solid.

R<sub>f</sub> = 0.28 in 20% EtOAc in hexanes.

**<sup>1</sup>H NMR (500 MHz, DMSO-*d*<sub>6</sub>, 354 K)** δ 7.37 (d, *J* = 8.2 Hz, 2H), 7.27 (d, *J* = 8.2 Hz, 2H), 6.29 – 6.24 (m, 1H), 6.22 – 6.17 (m, 1H), 5.66 – 5.56 (m, 1H), 5.51 (dd, *J* = 15.5, 9.5 Hz, 1H), 4.74 (d, *J* = 10.3 Hz, 1H), 4.64 (s, 1H), 4.27 (s, 1H), 3.44 (dd, appears as t, *J* = 10.2 Hz, 1H), 2.56 – 2.50 (m, 1H), 2.24 – 2.15 (m, 1H), 1.98 (d, *J* = 10.8 Hz, 1H), 1.71 – 1.59 (m, 4H), 1.30 (s, 9H).

**<sup>13</sup>C NMR (126 MHz, DMSO-*d*<sub>6</sub>, 354 K)** δ 141.5, 134.9, 134.6, 133.2, 130.6, 129.3, 128.1, 127.2, 113.5, 113.3, 78.9, 58.4, 56.6, 50.8, 48.2, 40.2, 32.8, 30.6, 27.5, 25.4, 16.9.

**HRMS (ESI<sup>-</sup>):** [M - H]<sup>-</sup> calculated for C<sub>25</sub>H<sub>27</sub>ClN<sub>3</sub>O<sub>2</sub><sup>-</sup> 436.1797; found 436.1784.

### Oxidative amidation and esterification of malononitriles

#### General procedure F.

Performed according to the modified literature procedure.<sup>17</sup> An alkyl malononitrile (1 equiv.) was dissolved in MeCN (0.05 M) and DMSO (0.05 M), and K<sub>2</sub>CO<sub>3</sub> (3 equiv., ground to fine powder) and a nucleophile (3 equiv.) were added. The reaction vessel was sealed, and the reaction was stirred vigorously overnight under continuous flow of O<sub>2</sub> (balloon) through the solution. Upon completion the reaction was diluted with EtOAc (2 × reaction volume), washed with saturated aqueous NH<sub>4</sub>Cl (2 × 20 mL) and brine (20 mL), dried with anhydrous Na<sub>2</sub>SO<sub>4</sub>, filtered, and concentrated under reduced pressure. The crude residue was purified by silica gel column chromatography using EtOAc in hexanes as an eluent.

#### Compound 6a

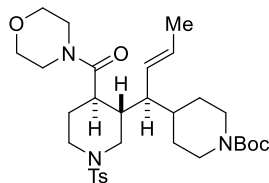

Prepared according to the General procedure F from **SI-3** and morpholine on a 0.19 mmol scale and obtained in 88% yield (98.2 mg, 0.17 mmol) as a white solid.

R<sub>f</sub> = 0.40 in 75% EtOAc in hexanes.

**<sup>1</sup>H NMR (400 MHz, CD<sub>3</sub>CN)** δ 7.65 (d, *J* = 8.3 Hz, 2H), 7.41 (d, *J* = 8.2 Hz, 2H), 5.33 (dq, *J* = 15.2, 6.3 Hz, 1H), 5.08 (ddq, *J* = 15.2, 10.2, 1.6 Hz, 1H), 4.07 – 3.98 (m, 2H), 3.65 – 3.20 (m, 10H), 2.71 – 2.32 (m, 8H), 2.16 – 2.03 (m, 1H), 1.80 – 1.63 (m, 2H), 1.64 – 1.46 (m, 7H), 1.41 (s, 9H), 1.05 (qd, *J* = 12.6, 4.1 Hz, 1H), 0.92 (qd, *J* = 12.2, 4.2 Hz, 1H).

**<sup>13</sup>C NMR (101 MHz, CD<sub>3</sub>CN)** δ 174.2, 155.4, 144.9, 134.3, 131.1, 130.7, 129.2, 128.7, 79.5, 67.4, 67.3, 55.3, 51.5, 49.7, 46.5, 45.9, 44.9, 42.7, 39.2, 37.8, 32.1, 29.1, 28.7, 28.6, 21.5, 18.3.

**HRMS (ESI-TOF):** [M+Na]<sup>+</sup> calculated for C<sub>31</sub>H<sub>47</sub>NaN<sub>3</sub>O<sub>6</sub>S<sup>+</sup> 612.3078; found 612.3102.



### Compound 6b

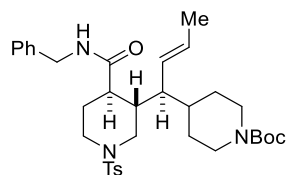

Prepared according to the General procedure F from **SI-3** and benzylamine on a 0.10 mmol scale and obtained in 79% yield (48.0 mg, 0.08 mmol) as a white solid.

$R_f = 0.39$  in 50% EtOAc in hexanes.

$^1\text{H NMR}$  (400 MHz,  $\text{CDCl}_3$ )  $\delta$  7.62 (d,  $J = 8.2$  Hz, 2H), 7.35 – 7.23 (m, 1H), 7.20 (d,  $J = 6.5$  Hz, 2H), 5.76 (t,  $J = 5.4$  Hz, 1H), 5.37 – 5.23 (m, 1H), 5.11 (dd,  $J = 14.5, 10.7$  Hz, 1H), 4.39 (dd,  $J = 14.6, 5.8$  Hz, 1H), 4.29 (dd,  $J = 14.6, 5.3$  Hz, 1H), 4.05 (d,  $J = 10.7$  Hz, 2H), 3.37 – 3.24 (m, 2H), 2.77 – 2.48 (m, 4H), 2.43 (s, 3H), 2.16 – 2.02 (m, 3H), 1.91 – 1.74 (m, 3H), 1.65 – 1.38 (m, 14H), 1.18 – 1.04 (m, 1H), 1.03 – 0.89 (m, 1H).

$^{13}\text{C NMR}$  (101 MHz,  $\text{CDCl}_3$ )  $\delta$  175.0, 155.4, 144.9, 140.4, 134.2, 130.9, 130.7, 129.3(9), 129.3(6), 128.7, 128.6, 127.9, 79.5, 51.6, 49.8, 46.1, 44.7, 43.6, 37.5, 37.2, 31.8, 30.3, 29.3, 28.6, 21.5, 18.1.

**HRMS (ESI-TOF):**  $[\text{M}+\text{Na}]^+$  Calculated for  $\text{C}_{34}\text{H}_{47}\text{NaN}_3\text{O}_5\text{S}^+$  632.3129. Found 632.3156.

### Compound 6c

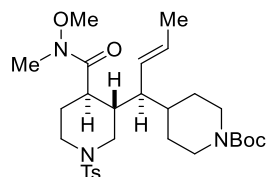

Prepared according to the General procedure F from **SI-3** and *N,O*-dimethylhydroxylamine hydrochloride on a 0.05 mmol scale and obtained in 53% yield (15.0 mg, 0.027 mmol) as a white solid.

$R_f = 0.38$  in 50% EtOAc in hexanes.

$^1\text{H NMR}$  (600 MHz,  $\text{CD}_3\text{CN}$ )  $\delta$  7.65 (d,  $J = 8.1$  Hz, 2H), 7.41 (d,  $J = 8.1$  Hz, 2H), 5.35 (dq,  $J = 15.0, 6.4$  Hz, 1H), 5.20 – 5.12 (m, 1H), 4.02 (br, 2H), 3.60 (s, 3H), 3.42 – 3.34 (m, 1H), 3.27 – 3.22 (m, 1H), 3.04 (s, 3H), 2.74 – 2.50 (m, 5H), 2.43 (s, 3H), 2.05 – 1.98 (m, 1H), 1.85 – 1.77 (m, 2H), 1.63 – 1.55 (m, 4H), 1.55 – 1.46 (m, 3H), 1.41 (s, 9H), 1.07 (qd,  $J = 12.8, 4.2$  Hz, 1H), 0.98 – 0.90 (m, 1H).

$^{13}\text{C NMR}$  (151 MHz,  $\text{CD}_3\text{CN}$ )  $\delta$  176.8, 155.4, 144.9, 134.3, 131.1, 130.7, 129.4, 128.7, 79.5, 62.1, 50.8, 49.0, 45.8, 38.6, 37.3, 37.2, 32.7, 32.1, 28.8, 28.6, 27.8, 21.5, 18.2.

**HRMS (ESI-TOF):**  $[\text{M}+\text{Na}]^+$  calculated for  $\text{C}_{29}\text{H}_{45}\text{NaN}_3\text{O}_6\text{S}^+$  586.2921; found 586.2948.

### Compound 6d

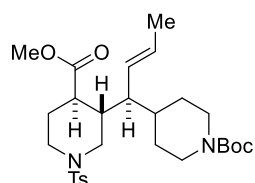

Prepared according to the General procedure F from **SI-3** and methanol on a 0.10 mmol scale and obtained in 65% yield, (34.8 mg, 0.06 mmol) as a colorless oil.

$R_f = 0.57$  in 50% EtOAc in hexanes.

$^1\text{H NMR}$  (400 MHz,  $\text{CDCl}_3$ )  $\delta$  7.62 (d,  $J = 8.2$  Hz, 2H), 7.30 (d,  $J = 8.2$  Hz, 2H), 5.37 – 5.23 (m, 1H), 5.11 (dd,  $J = 14.5$ , 10.7 Hz, 1H), 4.39 (dd,  $J = 14.6$ , 5.8 Hz, 1H), 4.29 (dd,  $J = 14.6$ , 5.3 Hz, 1H), 4.05 (d,  $J = 10.7$  Hz, 3H), 3.31 (t,  $J = 12.1$  Hz, 2H), 2.78 – 2.64 (m, 3H), 2.56 (dd,  $J = 31.8$ , 12.6 Hz, 3H), 2.43 (s, 3H), 2.17 – 2.01 (m, 1H), 1.91 – 1.74 (m, 2H), 1.59 (d,  $J = 5.6$  Hz, 3H), 1.49 (dd,  $J = 23.2$ , 9.2 Hz, 3H), 1.44 (s, 9H), 1.17 – 1.04 (m, 1H), 1.04 – 0.90 (m, 1H).

$^{13}\text{C NMR}$  (101 MHz,  $\text{CDCl}_3$ )  $\delta$  175.2, 155.0, 143.7, 133.4, 129.8, 129.5, 129.1, 127.7, 79.3, 51.9, 48.8, 47.2, 44.5, 45.2, 41.9, 36.3, 36.0, 31.4, 28.6, 27.4, 25.3, 21.6, 18.1.

HRMS (ESI-TOF):  $[\text{M}+\text{Na}]^+$  calculated for  $\text{C}_{28}\text{H}_{42}\text{NaN}_2\text{O}_6\text{S}^+$  557.2656; found 557.2682.

### Compound 6e

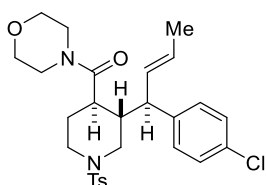

Prepared according to the General procedure F from **SI-4** and morpholine on a 0.16 mmol scale and obtained in 90% yield (75.8 mg, 0.15 mmol) as a white solid.

$R_f = 0.20$  in 50% EtOAc in hexanes.

$^1\text{H NMR}$  (400 MHz,  $\text{CDCl}_3$ )  $\delta$  7.51 (d,  $J = 8.3$  Hz, 2H), 7.29 – 7.19 (m, 4H), 7.03 (d,  $J = 8.5$  Hz, 2H), 5.56 – 5.38 (m, 2H), 3.84 – 3.14 (m, 11H), 2.58 – 2.35 (m, 5H), 2.34 – 2.26 (m, 1H), 2.21 (dd,  $J = 11.9$ , 9.1 Hz, 1H), 1.79 – 1.68 (m, 2H), 1.60 (d,  $J = 5.3$  Hz, 3H).

$^{13}\text{C NMR}$  (101 MHz,  $\text{CDCl}_3$ )  $\delta$  172.9, 143.7, 140.6, 133.2, 132.5, 132.4, 129.7, 129.5, 128.8, 127.7, 126.8, 66.9, 66.5, 51.1, 47.2, 45.8, 44.9, 41.7, 41.0, 39.2, 27.6, 21.6, 18.1.

HRMS (ESI-TOF):  $[\text{M}+\text{Na}]^+$  calculated for  $\text{C}_{27}\text{H}_{33}\text{ClNaN}_2\text{O}_4\text{S}^+$  539.1742; found 539.1747.

### Compound 6f

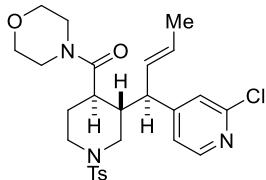

Prepared according to the sequence of the General procedure E (used after aqueous work-up) from **4i** on a 0.213 mmol scale followed by the General procedure F with addition of morpholine and obtained in 51% yield (56.4 mg, 0.107 mmol) as a white solid.

$R_f = 0.40$  in 70% EtOAc in hexanes.

**<sup>1</sup>H NMR (400 MHz, CDCl<sub>3</sub>)** δ 8.30 (d, *J* = 5.1 Hz, 1H), 7.55 (d, *J* = 8.0 Hz, 2H), 7.29 (d, *J* = 8.0 Hz, 2H), 7.07 (d, *J* = 1.5 Hz, 1H), 7.02 (dd, *J* = 5.2 Hz, 1.5, 1H), 5.63 – 5.43 (m, 2H), 3.83 – 3.52 (m, 5H), 3.49 – 3.27 (m, 6H), 2.69 – 2.58 (m, 1H), 2.52 – 2.39 (m, 4H), 2.36 – 2.23 (m, 2H), 1.84 – 1.70 (m, 2H), 1.66 (dd, *J* = 6.0, 1.1 Hz, 3H).

**<sup>13</sup>C NMR (101 MHz, CDCl<sub>3</sub>)** δ 172.5, 154.6, 152.0, 150.0, 144.0, 133.2, 130.5, 129.9, 128.9, 127.8, 124.1, 122.6, 67.0, 66.6, 50.7, 46.9, 45.9, 44.9, 42.2, 40.6, 38.9, 27.3, 21.7, 18.2.

**HRMS (ESI-TOF):** [M+H]<sup>+</sup> calculated for C<sub>26</sub>H<sub>33</sub>ClN<sub>3</sub>O<sub>4</sub>S<sup>+</sup> 518.1875; found 518.1900.

#### Compound 6g

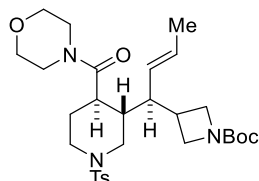

Prepared according to the General procedure F from **SI-5** on a 0.11 mmol scale and obtained in 55% yield (32.4 mg, 0.06 mmol) as a white solid.

*R<sub>f</sub>* = 0.16 in 50% EtOAc in hexanes.

**<sup>1</sup>H NMR (400 MHz, CD<sub>3</sub>CN)** δ 7.67 (d, *J* = 8.2 Hz, 2H), 7.44 (d, *J* = 8.2 Hz, 2H), 5.47 (dq, *J* = 15.0, 6.4 Hz, 1H), 5.23 – 5.12 (m, 1H), 3.81 (t, *J* = 8.2 Hz, 1H), 3.72 (t, *J* = 7.8 Hz, 1H), 3.66 – 3.50 (m, 8H), 3.48 – 3.34 (m, 4H), 2.53 – 2.38 (m, 5H), 2.31 (td, *J* = 11.7, 2.8 Hz, 1H), 2.16 (d, *J* = 11.5 Hz, 2H), 2.08 – 2.01 (m, 1H), 1.80 – 1.71 (m, 1H), 1.65 (dd, *J* = 6.4, 1.4 Hz, 3H), 1.59 – 1.46 (m, 1H), 1.42 (s, 9H).

**<sup>13</sup>C NMR (101 MHz, CD<sub>3</sub>CN)** δ 173.54, 157.19, 144.96, 134.14, 130.70, 129.71, 129.54, 128.73, 79.41, 67.36, 49.47, 49.25, 46.56, 46.19, 42.77, 39.91, 39.27, 31.04, 29.58, 28.58, 25.62, 21.53, 18.34.

**HRMS (ESI-TOF):** [M+Na]<sup>+</sup> calculated for C<sub>29</sub>H<sub>43</sub>NaN<sub>3</sub>O<sub>6</sub>S<sup>+</sup> 584.2765; found 584.2790.

#### Compound 6h

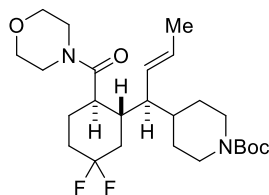

Prepared according to the General procedure F from **5a** and morpholine on a 0.12 mmol scale and obtained in 66% yield (37.4 mg, 0.08 mmol) as a white solid.

*R<sub>f</sub>* = 0.43 in 50% EtOAc in hexanes.

**<sup>1</sup>H NMR (400 MHz, CD<sub>3</sub>CN)** δ 5.35 (dq, *J* = 15.0, 6.3 Hz, 1H), 5.19 – 5.07 (m, 1H), 4.00 (d, *J* = 12.5 Hz, 2H), 3.74 – 3.38 (m, 7H), 3.29 (ddd, *J* = 12.7, 7.7, 2.9 Hz, 1H), 2.68 – 2.46 (m, 3H), 2.41 – 2.28 (m, 1H), 2.14 – 1.98 (m, 2H), 1.84 – 1.52 (m, 10H), 1.49 – 1.35 (m, 10H), 1.00 (qd, *J* = 12.6, 4.4 Hz, 1H), 0.88 (qd, *J* = 12.7, 4.3 Hz, 1H).

**<sup>13</sup>C NMR (101 MHz, CD<sub>3</sub>CN)** δ 174.5(3), 174.5(1), 155.4, 131.6, 128.8, 125.0 (t, *J* = 240.6 Hz), 79.5, 67.5, 67.4, 54.3, 46.7, 42.8, 40.5, 37.6, 37.5 (d, *J* = 9.0 Hz), 36.1 (ddd, *J* = 555.6, 23.4 Hz, 23.0 Hz), 32.1, 30.1, 28.6, 27.7 (d, *J* = 9.8 Hz), 18.4.

**<sup>19</sup>F NMR (377 MHz, CDCl<sub>3</sub>)** δ -90.4 (d, *J* = 237.0 Hz), -100.0 (d, *J* = 250.7 Hz).

**HRMS (ESI-TOF):** [M+Na]<sup>+</sup> calculated for C<sub>25</sub>H<sub>40</sub>F<sub>2</sub>NaN<sub>2</sub>O<sub>4</sub> 493.2848; found 493.2869.

#### Compound 6i

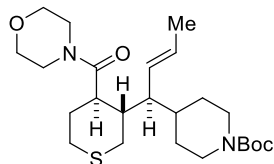

Prepared according to the General procedure F from **SI-6** and morpholine on a 0.13 mmol scale and obtained in 45% yield (27.4 mg, 0.06 mmol) as a colorless oil.

*R<sub>f</sub>* = 0.19 in 50% EtOAc in hexanes.

**<sup>1</sup>H NMR (400 MHz, CD<sub>3</sub>CN)** δ 5.39 (dq, *J* = 15.0, 6.3 Hz, 1H), 5.23 – 5.11 (m, 1H), 4.00 (d, *J* = 12.4 Hz, 2H), 3.69 – 3.27 (m, 8H), 2.73 – 2.44 (m, 7H), 2.21 – 2.08 (m, 1H), 2.03 – 1.95 (m, 1H), 1.85 (dq, *J* = 12.8, 6.9, 6.3 Hz, 1H), 1.75 – 1.61 (m, 4H), 1.63 – 1.42 (m, 3H), 1.40 (s, 9H), 1.06 (qd, *J* = 12.6, 4.2, 1H), 0.92 (qd, *J* = 12.6, 4.2 Hz, 1H).

**<sup>13</sup>C NMR (101 MHz, CD<sub>3</sub>CN)** δ 174.9, 155.4, 131.7, 128.8, 79.5, 67.4, 53.5, 46.7, 45.2, 42.7, 41.2, 40.2, 37.7, 32.4, 31.5, 31.3, 29.6, 28.6, 27.1, 18.3.

**HRMS (ESI-TOF):** [M+Na]<sup>+</sup> calculated for C<sub>24</sub>H<sub>40</sub>NaN<sub>2</sub>O<sub>4</sub>S 475.2601; found 475.2607.

#### Compound 6j

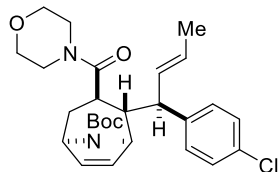

Prepared according to the General procedure F on 0.15 mmol scale from **SI-7** and morpholine (2 equiv.) with the following modifications: the reaction was performed in MeCN (0.1 M) using K<sub>2</sub>CO<sub>3</sub> (2 equiv.); upon completion the reaction mixture was filtered through a celite plug and purified by silica gel column chromatography. The desired product was isolated in 71% yield (0.052 g, 0.11 mmol) as a white solid.

*R<sub>f</sub>* = 0.08 in 40% EtOAc in hexanes

**<sup>1</sup>H NMR (600 MHz, DMSO-*d*<sub>6</sub>, 353 K)** δ 7.36 (d, *J* = 8.4 Hz, 2H), 7.23 (d, *J* = 8.4 Hz, 2H), 6.09 (dd, *J* = 5.8, 2.3 Hz, 1H), 5.99 (dd, *J* = 5.8, 2.5 Hz, 1H), 5.47 (dq, *J* = 14.8, 6.3 Hz, 1H), 5.29 – 5.20 (m, 1H), 4.50 (d, *J* = 6.7 Hz, 1H), 4.16 (d, *J* = 1.5 Hz, 1H), 3.59 – 3.50 (m, 4H), 3.49 – 3.37 (m, 2H), 3.36 – 3.25 (m, 3H), 2.85 – 2.78 (m, 1H), 2.59 (dd, *J* = 11.0, 6.2 Hz, 1H), 2.20 – 2.11 (m, 1H), 1.55 (dd, *J* = 6.3, 1.6 Hz, 3H), 1.41 (s, 9H), 1.30 – 1.24 (m, 1H).

**<sup>13</sup>C NMR (151 MHz, DMSO-*d*<sub>6</sub>, 353 K)** δ 173.0, 153.3, 142.2, 134.6, 133.3, 130.4, 129.3, 128.1, 125.2, 78.6, 65.8, 58.3, 55.4, 53.7, 43.5, 38.8, 37.5, 27.7, 26.3, 17.1.

**HRMS (DART<sup>+</sup>):** [M + H]<sup>+</sup> calculated for C<sub>27</sub>H<sub>36</sub>ClN<sub>2</sub>O<sub>4</sub><sup>+</sup> 487.2358; found 487.2337.

### Ring-opening metathesis: synthesis of compound 9

#### Compound 9

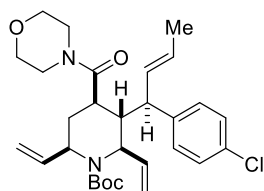

To an oven dried Schlenk flask containing a solution of **6j** (1 equiv., 0.043 g, 0.09 mmol) in dry DCM (4.5 mL, 0.02 M), Hoveyda-Grubbs II catalyst (0.003 g, 5 mol%) was added under a flow of N<sub>2</sub>. Ethylene gas (balloon) was bubbled through a solution for 30 minutes, and the reaction proceeded at room temperature overnight under ethylene atmosphere. The reaction mixture was concentrated under reduced pressure and purified by column chromatography on silica gel to provide the desired product in 85% yield (0.035 g, 0.08 mmol) as a colorless oil.

R<sub>f</sub> = 0.34 in 40% EtOAc in hexanes.

<sup>1</sup>H NMR (500 MHz, DMSO-*d*<sub>6</sub>, 373 K) δ 7.33 (d, *J* = 8.4 Hz, 2H), 7.18 (d, *J* = 8.4 Hz, 2H), 5.87 – 5.72 (m, 2H), 5.55 – 5.43 (m, 1H), 5.32 (dd, *J* = 14.4, 10.1 Hz, 1H), 5.08 – 4.90 (m, 4H), 4.51 (s, 1H), 4.39 – 4.30 (m, 1H), 3.63 – 3.36 (m, 8H), 3.20 – 3.13 (m, 1H), 3.04 (dd, appears as t, *J* = 10.1 Hz, 1H), 2.57 – 2.50 (m, overlaps with solvent peak at 2.50, 1H), 1.81 – 1.73 (m, 1H), 1.68 – 1.60 (m, 1H), 1.57 (d, *J* = 5.6 Hz, 3H), 1.40 (s, 9H).

<sup>13</sup>C NMR (126 MHz, DMSO-*d*<sub>6</sub>, 373 K) δ 172.1, 154.1, 142.0, 141.5, 139.8, 132.6, 130.4, 129.2, 127.8, 125.2, 113.8, 113.7, 78.5, 65.6, 54.1, 53.8, 53.0, 43.2, 38.3, 29.4, 27.6, 17.0.

HRMS (ESI<sup>+</sup>): [M + H]<sup>+</sup> calculated for C<sub>29</sub>H<sub>40</sub>ClN<sub>2</sub>O<sub>4</sub><sup>+</sup> 515.2671; found 515.2689.

## 2-pot protocol toward compound 8

Telescoped sequence allylic alkylation/Cope rearrangement/reduction.

### Compound 7

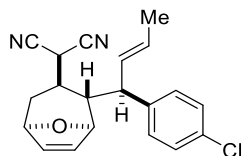

To an oven dried Schlenk flask equipped with Pd<sub>2</sub>(dba)<sub>3</sub> (0.009 g, 1 mol%), (*S,S*)- DACH phenyl Trost ligand (0.014 g, 2 mol%), and a stir bar under N<sub>2</sub> atmosphere, anhydrous DCM (5 mL, 0.2 M) was added via syringe, and the contents were left at stirring for 15 minutes. The septum was removed, and an alkylidene malononitrile **1g** (1 equiv., 0.172 g, 1.0 mmol) was added under a flow of N<sub>2</sub>. The flask was sealed with a rubber septum, and electrophile **rac-2a** (2.2 equiv., 0.529 g, 2.2 mmol) was added via syringe. The reaction mixture was stirred at room temperature for 3 hours, then heated to 40 °C, and left at this temperature for 30 minutes. The reaction vessel was cooled to room temperature and placed on an ice-water bath followed by addition of MeOH (2.5 mL) and DMPU (2.5 mL). After slow addition of NaBH<sub>4</sub> (0.057 g, 1.5 equiv. relative to **1g**) at 0 °C the reaction vessel was removed from the ice-water bath and left at room temperature for 3 hours. The reaction mixture was slowly quenched with water, diluted with 2 M HCl, and extracted with EtOAc (3x). The combined organic layers were washed with brine, dried over anhydrous Na<sub>2</sub>SO<sub>4</sub>, filtered, and concentrated under reduced pressure. The product was isolated by column chromatography on silica gel using EtOAc in hexanes as an eluent in 27% yield (0.091 g, 0.27 mmol) as a white solid.

R<sub>f</sub> = 0.33 in 20% EtOAc in hexanes.

**<sup>1</sup>H NMR (600 MHz, CDCl<sub>3</sub>)** δ 7.31 (d, *J* = 8.4 Hz, 2H), 7.18 (d, *J* = 8.4 Hz, 2H), 6.31 (dd, *J* = 6.0, 1.8 Hz, 1H), 6.16 (dd, *J* = 6.0, 2.0 Hz, 1H), 5.70 – 5.58 (m, 2H), 4.78 – 4.74 (m, 1H), 4.28 (d, *J* = 12.1 Hz, 1H), 4.23 (s, 1H), 3.62 (dd, *J* = 11.2, 8.9 Hz, 1H), 2.71 (dd, *J* = 12.1, 8.2 Hz, 1H), 2.34 – 2.26 (m, 1H), 1.73 – 1.66 (m, 5H).

**<sup>13</sup>C NMR (151 MHz, CDCl<sub>3</sub>)** δ 141.3, 134.8, 134.4, 132.6, 132.5, 129.7, 129.3, 129.1, 112.7, 112.5, 77.9, 77.4, 50.8, 40.5, 33.4, 30.9, 24.9, 18.0.

**HRMS (DART<sup>+</sup>):** [M + NH<sub>4</sub>]<sup>+</sup> calculated for C<sub>20</sub>H<sub>23</sub>ClN<sub>3</sub>O<sup>+</sup> 356.1524; found 356.1528.

Ring rearrangement metathesis/oxidative amidation sequence.

### Compound 8

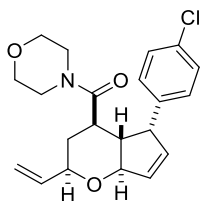

To an oven dried Schlenk flask containing a solution of **7** (1 equiv., 0.049 g, 0.14 mmol) in dry DCM (7 mL, 0.02 M), Hoveyda-Grubbs II catalyst (0.004 g, 5 mol%) was added under a flow of N<sub>2</sub>, and the flask was sealed with a rubber septum. Ethylene gas (balloon) was bubbled through the solution for 2.5 hours at room temperature until the completion of the reaction based on TLC. The reaction mixture was concentrated, K<sub>2</sub>CO<sub>3</sub> (2 equiv., 0.039 g, 0.28 mmol) was added to the reaction vessel followed by MeCN (1.4 mL, 0.1 M), and the reaction mixture was saturated with O<sub>2</sub> and kept under O<sub>2</sub> atmosphere (balloon). Morpholine (2 equiv., 0.024 mL, 0.28 mmol) was added via syringe at stirring, and the reaction was allowed to proceed overnight at room temperature. Upon completion the reaction mixture was filtered through a celite plug, the solvent was evaporated under reduced pressure, and the crude residue was purified by silica gel column chromatography using EtOAc in hexanes as an eluent to provide the desired product in 38% yield (0.020 g, 0.05 mmol) as a colorless oil.

R<sub>f</sub> = 0.19 in 50% EtOAc in hexanes.

**<sup>1</sup>H NMR (400 MHz, CDCl<sub>3</sub>)** δ 7.24 (d, overlaps with solvent peak at 7.26, *J* = 8.4 Hz, 2H), 6.95 (d, *J* = 8.4 Hz, 2H), 6.34 – 6.26 (m, 1H), 6.10 – 6.02 (m, 1H), 5.91 – 5.78 (m, 1H), 5.26 (d, *J* = 17.3 Hz, 1H), 5.15 (d, *J* = 10.6 Hz, 1H), 4.33 – 4.25 (m, 1H), 4.16 – 4.05 (m, 1H), 3.97 – 3.87 (m, 1H), 3.70 – 3.54 (m, 4H), 3.53 – 3.43 (m, 1H), 3.41 – 3.31 (m, 1H), 3.20 – 3.09 (m, 1H), 3.06 – 2.94 (m, 1H), 2.65 – 2.54 (m, 1H), 2.29 – 2.17 (m, 1H), 1.68 – 1.62 (m, 1H), 1.60 – 1.49 (m, 1H).

**<sup>13</sup>C NMR (151 MHz, CDCl<sub>3</sub>)** δ 171.9, 137.5, 137.2, 135.2, 134.7, 132.6, 129.6, 128.6, 116.7, 84.8, 79.1, 67.0, 66.5, 51.1, 49.1, 45.6, 42.1, 39.2, 35.8.

**HRMS (ESI<sup>+</sup>):** [M + H]<sup>+</sup> calculated for C<sub>21</sub>H<sub>25</sub>ClNO<sub>3</sub><sup>+</sup> 374.1517; found 374.1527.

### Synthesis of lactones

#### General procedure G. Alkene ozonolysis followed by reduction.

Prepared according to the modified literature procedure.<sup>9</sup> To an oven dried Schlenk flask containing **4** (1 equiv.) and NaHCO<sub>3</sub> (0.25 equiv.) under N<sub>2</sub> atmosphere, dry MeOH (0.1 M) and dry DCM (0.02 M) were added. The reaction mixture was cooled to -78 °C in a dry ice/acetone bath, and O<sub>2</sub> was bubbled through the solution for 2 minutes followed by ozone for up to 5 minutes until the color change from colorless to blue was observed. Then N<sub>2</sub> was bubbled through the solution, and NaBH<sub>4</sub> (3 equiv.) was added in one portion. The reaction mixture was removed from the dry ice/acetone bath and left at stirring at room temperature. After 1 hour the reaction was slowly

quenched with saturated aqueous solution of  $\text{NH}_4\text{Cl}$ , the organic layer was separated, and the aqueous layer was extracted with DCM (2x). The combined organic layers were washed with brine and dried over anhydrous  $\text{Na}_2\text{SO}_4$ . Solvent was evaporated under reduced pressure and the crude residue was purified by column chromatography with EtOAc in hexanes as an eluent.

### Compound 10b

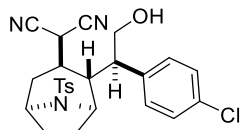

Prepared according to the General procedure G from **4w** on 0.14 mmol scale and isolated in 70% yield (0.047 g, 0.10 mmol) as a white solid.

$R_f = 0.42$  in 40% EtOAc in hexanes.

$^1\text{H NMR}$  (400 MHz,  $\text{CDCl}_3$ )  $\delta$  7.54 (d,  $J = 8.2$  Hz, 2H), 7.41 – 7.28 (m, 4H), 7.24 (d, overlaps with solvent peak at 7.26,  $J = 8.2$  Hz, 2H), 4.61 (d,  $J = 5.8$  Hz, 1H), 4.34 – 4.26 (m, 1H), 3.89 (dd,  $J = 11.9, 3.6$  Hz, 1H), 3.85 – 3.74 (m, 2H), 3.09 (ddd, appears as dt,  $J = 10.5, 3.6$  Hz, 1H), 2.84 – 2.72 (m, 1H), 2.61 – 2.49 (m, 1H), 2.41 (s, 3H), 2.01 (dd,  $J = 10.5, 5.8$  Hz, 1H), 1.90 (br, 1H), 1.60 – 1.47 (m, 2H), 1.46 – 1.33 (m, 2H), 1.28 – 1.19 (m, 1H).

$^{13}\text{C NMR}$  (101 MHz,  $\text{CDCl}_3$ )  $\delta$  144.2, 139.9, 136.4, 133.4, 130.4, 130.1, 129.2, 127.3, 112.7, 112.6, 63.8, 57.5, 54.7, 50.2, 48.4, 33.7, 33.6, 30.9, 29.0, 28.4, 21.7.

HRMS (ESI<sup>+</sup>):  $[\text{M} + \text{H}]^+$  calculated for  $\text{C}_{25}\text{H}_{27}\text{ClN}_3\text{O}_3\text{S}^+$  484.1456; found 484.1461.

### Compound 10c

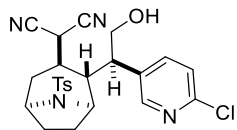

Prepared according to the General procedure G from **4z** on 0.10 mmol scale and isolated in 50% yield (0.024 g, 0.05 mmol) as a white solid.

$R_f = 0.26$  in 40% EtOAc in hexanes.

$^1\text{H NMR}$  (400 MHz,  $\text{CDCl}_3$ )  $\delta$  8.44 (d,  $J = 2.4$  Hz, 1H), 7.79 (dd,  $J = 8.3, 2.4$  Hz, 1H), 7.53 (d,  $J = 8.2$  Hz, 2H), 7.34 (d,  $J = 8.3$  Hz, 1H), 7.24 (d,  $J = 8.2$  Hz, 2H), 4.77 (d,  $J = 5.6$  Hz, 1H), 4.38 – 4.23 (m, 1H), 3.97 (dd,  $J = 12.0, 3.2$  Hz, 1H), 3.82 (dd,  $J = 12.0, 3.2$  Hz, 1H), 3.68 (d,  $J = 8.0$  Hz, 1H), 3.58 – 3.03 (m, 2H), 2.90 – 2.72 (m, 1H), 2.64 – 2.50 (m, 1H), 2.40 (s, 3H), 2.12 – 1.98 (m, 1H), 1.63 – 1.48 (m, 2H), 1.48 – 1.35 (m, 2H), 1.22 – 1.06 (m, 1H).

$^{13}\text{C NMR}$  (101 MHz,  $\text{CDCl}_3$ )  $\delta$  150.2, 149.8, 144.4, 140.6, 136.7, 136.2, 130.2, 127.2, 124.6, 112.7, 112.6, 62.6, 57.4, 54.7, 47.9(2), 47.8(7), 33.7, 33.5, 30.9, 28.8, 28.4, 21.7.

HRMS (ESI<sup>+</sup>):  $[\text{M} + \text{H}]^+$  calculated for  $\text{C}_{24}\text{H}_{26}\text{ClN}_4\text{O}_3\text{S}^+$  485.1409; found 485.1420.

### Compound 11a

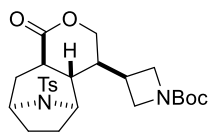

Prepared according to the sequence of the General procedure G from **4v** followed by the General procedure F on 0.1 mmol scale with the following modifications: upon completion of ozonolysis the reaction was quenched with Me<sub>2</sub>S (0.022 mL, 0.3 mmol, 3 equiv.) to provide the corresponding aldehyde. Purification by column chromatography resulted in a contaminated sample (0.031 g) that was dissolved in MeOH (0.6 mL) and DCM (3 mL). The solution was cooled to 0 °C in an ice-water bath, NaBH<sub>4</sub> (5 equiv., 0.011 g, 0.3 mmol) was added in one portion, and the flask was removed from the bath. After 1 hour the reaction mixture was quenched with water, diluted with 2 M HCl, and extracted with EtOAc (2x). The combined organic layers were washed with brine, dried over Na<sub>2</sub>SO<sub>4</sub>, filtered, and solvent was evaporated under reduced pressure. The crude residue (0.025 g) was used without further purification to prepare the desired compound according to the General procedure F with the following modifications: the reaction was performed in MeCN (0.1 M) using K<sub>2</sub>CO<sub>3</sub> (2 equiv., 0.011 g, 0.08 mmol) without an addition of nucleophile; upon completion the reaction mixture was filtered through a celite plug and purified by preparative TLC on silica gel. Compound **11a** was isolated in 30% yield (over 3 steps, 0.014 g, 0.03 mmol) as a white solid.

*Note:* the absolute stereochemistry was assigned via analogy to **11b**.

R<sub>f</sub> = 0.47 in 60% EtOAc in hexanes.

<sup>1</sup>H NMR (400 MHz, CD<sub>3</sub>CN) δ 7.74 (d, *J* = 8.2 Hz, 2H), 7.36 (d, *J* = 8.2 Hz, 2H), 4.33 (dd, *J* = 12.5, 6.2 Hz, 1H), 4.30 – 4.22 (m, 1H), 4.08 (dd, *J* = 12.5, 1.8 Hz, 1H), 4.05 – 4.00 (m, 1H), 3.98 – 3.85 (m, 2H), 3.66 – 3.51 (m, 2H), 2.77 – 2.65 (m, 1H), 2.62 – 2.42 (m, 2H), 2.41 (s, 3H), 2.25 – 2.16 (m, 1H), 1.61 – 1.42 (m, 4H), 1.41 (s, 9H), 1.37 – 1.31 (m, 1H), 1.22 – 1.11 (m, 1H).

<sup>13</sup>C NMR (101 MHz, CD<sub>3</sub>CN) δ 176.0, 157.1, 145.0, 138.5, 130.8, 128.0, 79.7, 67.4, 61.6, 54.8, 52.9 (br), 47.8, 44.0, 35.6, 33.4, 32.3, 32.2, 32.1, 28.6, 21.5.

HRMS (ESI<sup>+</sup>): [M + Na]<sup>+</sup> calculated for C<sub>25</sub>H<sub>34</sub>N<sub>2</sub>O<sub>6</sub>SNa<sup>+</sup> 513.2030; found 513.2043.

### Compound 11b

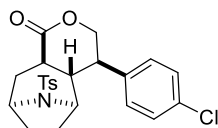

Prepared according to the General procedure F from **10b** on 0.10 mmol scale without an addition of nucleophile with the following modifications: the reaction was performed in MeCN (0.1 M) using K<sub>2</sub>CO<sub>3</sub> (2 equiv.); upon completion the reaction mixture was filtered through a celite plug and purified by silica gel column chromatography. The desired product was isolated in 79% yield (0.035 g, 0.08 mmol) as a white solid.

*Note:* the absolute stereochemistry was assigned based on the crystal structure of **11b**.

R<sub>f</sub> = 0.25 in 40% EtOAc in hexanes.

<sup>1</sup>H NMR (400 MHz, CDCl<sub>3</sub>) δ 7.66 (d, *J* = 8.2 Hz, 2H), 7.35 (d, *J* = 8.4 Hz, 2H), 7.27 (d, overlaps with solvent peak at 7.26, *J* = 8.2 Hz, 2H), 7.17 (d, *J* = 8.4 Hz, 2H), 4.55 (dd, *J* = 12.2, 7.2 Hz, 1H), 4.36 – 4.27 (m, 1H), 4.24 (dd, *J* = 12.2, 6.5 Hz, 1H), 3.82 (d, *J* = 6.3 Hz, 1H), 3.25 – 3.14 (m, 1H), 2.81 – 2.69 (m, 1H), 2.64 – 2.51 (m, 1H), 2.41 (s, 3H), 1.76 – 1.65 (m, 1H), 1.62 – 1.44 (m, 2H), 1.47 – 1.33 (m, 2H), 1.26 – 1.18 (m, 1H).



**<sup>13</sup>C NMR (151 MHz, CDCl<sub>3</sub>)** δ 174.2, 143.9, 138.7, 137.3, 133.8, 130.0, 129.6, 129.4, 127.2, 72.7, 57.6, 54.0, 50.4, 46.5, 37.3, 32.9, 31.8, 21.7.

**HRMS (ESI<sup>-</sup>):** [M - H]<sup>-</sup> calculated for C<sub>23</sub>H<sub>23</sub>ClNO<sub>4</sub>S<sup>-</sup> 444.1042; found 444.1045.

#### Compound 11c

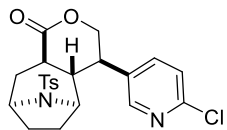

Prepared according to the General procedure F from **10c** on 0.05 mmol scale without an addition of nucleophile with the following modifications: the reaction was performed in MeCN (0.5 mL, 0.1 M) using K<sub>2</sub>CO<sub>3</sub> (2 equiv., 0.014 g, 0.1 mmol); upon completion the reaction mixture was filtered through a celite plug and purified by silica gel column chromatography. The desired product was isolated in 55% yield (0.012 g, 0.03 mmol) as a white solid.

*Note:* the absolute stereochemistry was assigned via analogy to **11b**.

R<sub>f</sub> = 0.24 in 40% EtOAc in hexanes.

**<sup>1</sup>H NMR (400 MHz, CDCl<sub>3</sub>)** δ 8.30 (d, *J* = 2.6 Hz, 1H), 7.67 (d, *J* = 8.2 Hz, 2H), 7.59 (dd, *J* = 8.2, 2.6 Hz, 1H), 7.38 (d, *J* = 8.2 Hz, 1H), 7.28 (d, *J* = 8.2 Hz, 2H), 4.61 (dd, *J* = 12.4, 7.3 Hz, 1H), 4.38 – 4.29 (m, 1H), 4.26 (dd, *J* = 12.4, 5.3 Hz, 1H), 3.82 (d, *J* = 5.6 Hz, 1H), 3.34 – 3.23 (m, 1H), 2.83 – 2.70 (m, 1H), 2.71 – 2.59 (m, 1H), 2.42 (s, 3H), 1.71 – 1.63 (m, 1H), 1.56 – 1.49 (m, 2H), 1.47 – 1.41 (m, 1H), 1.41 – 1.35 (m, 1H), 1.25 – 1.18 (m, 1H).

**<sup>13</sup>C NMR (101 MHz, CDCl<sub>3</sub>)** δ 174.1, 151.4, 149.2, 144.1, 138.1, 137.1, 135.5, 130.1, 127.1, 125.3, 71.7, 57.7, 54.0, 50.9, 43.8, 37.0, 32.5, 31.8, 31.7, 21.7.

**HRMS (ESI<sup>+</sup>):** [M + H]<sup>+</sup> calculated for C<sub>22</sub>H<sub>24</sub>ClN<sub>2</sub>O<sub>4</sub>S<sup>+</sup> 447.1140; found 447.1150.

#### X-ray Crystallography data

Crystals of **4y** and **11b** were obtained by slow evaporation of *i*PrOH/hexanes/EtOAc solution at room temperature.

X-Ray Intensity data were collected by the Center for X-Ray Crystallography of the University of Florida on a Bruker Dual micro source D8 Venture diffractometer and PHOTON III detector running APEX3 software package of programs and using MoK $\alpha$  radiation ( $\lambda$  = 0.71073 Å). The data frames were integrated, and multi-scan scaling was applied in APEX3. Intrinsic phasing structure solution provided all of the non-H atoms. The structure was refined using full-matrix least-squares refinement.<sup>18</sup> The non-H atoms were refined with anisotropic displacement parameters and all of the H atoms were calculated in idealized positions and refined riding on their parent atoms.

Crystal structure data for compound 4y.

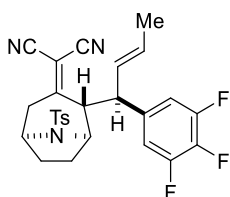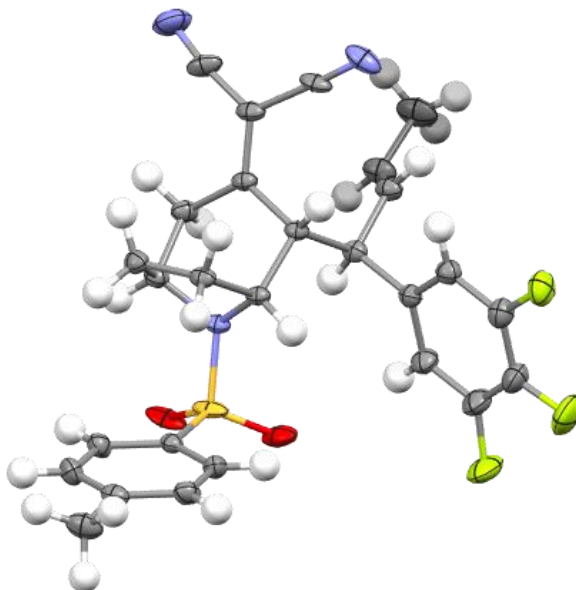

The molecule has three disordered groups: SO<sub>2</sub>, CN and the F atoms. Two parts are refined in each case with their site occupation parameters fixed after being fully refined. In the final cycle of refinement, 8307 reflections (of which 6880 are observed with  $I > 2\sigma(I)$ ) were used to refine 393 parameters and the resulting  $R_1$ ,  $wR_2$  and  $S$  (goodness of fit) were 3.70%, 10.09% and 1.043, respectively. The refinement was carried out by minimizing the  $wR_2$  function using  $F^2$  rather than  $F$  values.  $R_1$  is calculated to provide a reference to the conventional  $R$  value but its function is not minimized.

**Table S2.** Crystal data and structure refinement for **4y**.

|                                 |                                                                                |                       |
|---------------------------------|--------------------------------------------------------------------------------|-----------------------|
| CCDC                            | 2193762                                                                        |                       |
| Empirical formula               | C <sub>27</sub> H <sub>24</sub> F <sub>3</sub> N <sub>3</sub> O <sub>2</sub> S |                       |
| Formula weight                  | 511.55                                                                         |                       |
| Temperature                     | 173(2) K                                                                       |                       |
| Wavelength                      | 0.71073 Å                                                                      |                       |
| Crystal system                  | Orthorhombic                                                                   |                       |
| Space group                     | P 21 21 21                                                                     |                       |
| Unit cell dimensions            | a = 7.4828(3) Å                                                                | $\alpha = 90^\circ$ . |
|                                 | b = 18.3087(7) Å                                                               | $\beta = 90^\circ$ .  |
|                                 | c = 18.4701(7) Å                                                               | $\gamma = 90^\circ$ . |
| Volume                          | 2530.41(17) Å <sup>3</sup>                                                     |                       |
| Z                               | 4                                                                              |                       |
| Density (calculated)            | 1.343 Mg/m <sup>3</sup>                                                        |                       |
| Absorption coefficient          | 0.180 mm <sup>-1</sup>                                                         |                       |
| F(000)                          | 1064                                                                           |                       |
| Crystal size                    | 0.352 x 0.198 x 0.128 mm <sup>3</sup>                                          |                       |
| Theta range for data collection | 2.205 to 32.461°.                                                              |                       |
| Index ranges                    | -10 ≤ h ≤ 6, -27 ≤ k ≤ 26, -26 ≤ l ≤ 27                                        |                       |
| Reflections collected           | 43297                                                                          |                       |
| Independent reflections         | 8307 [R(int) = 0.0301]                                                         |                       |
| Completeness to theta = 25.242° | 99.9 %                                                                         |                       |
| Absorption correction           | multi-scan                                                                     |                       |
| Refinement method               | Full-matrix least-squares on F <sup>2</sup>                                    |                       |

|                                                |                                                                                                             |
|------------------------------------------------|-------------------------------------------------------------------------------------------------------------|
| Data / restraints / parameters                 | 8307 / 804 / 393                                                                                            |
| Goodness-of-fit on $F^2$                       | 1.043                                                                                                       |
| Final R indices [ $>2\sigma(I)$ ]              | R1 = 0.0370, wR2 = 0.1009 [6880]                                                                            |
| R indices (all data)                           | R1 = 0.0491, wR2 = 0.1096                                                                                   |
| Absolute structure parameter                   | -0.004(15)                                                                                                  |
| Extinction coefficient                         | n/a                                                                                                         |
| Largest diff. peak and hole                    | 0.303 and -0.146 e. $\text{\AA}^{-3}$                                                                       |
| $R1 = \sum( F_o  -  F_c ) / \sum F_o $         | $wR2 = [\sum[w(F_o^2 - F_c^2)^2] / \sum[w(F_o^2)^2]]^{1/2}$                                                 |
| $S = [\sum[w(F_o^2 - F_c^2)^2] / (n-p)]^{1/2}$ | $w = 1/[\sigma^2(F_o^2) + (m^*p)^2 + n^*p]$ , $p = [\max(F_o^2, 0) + 2^* F_c^2] / 3$ , m & n are constants. |

**Table S3.** Atomic coordinates ( $\times 10^4$ ) and equivalent isotropic displacement parameters ( $\text{\AA}^2 \times 10^3$ ) for **4y**. U(eq) is defined as one third of the trace of the orthogonalized  $U^{ij}$  tensor.

|      | x         | y        | z        | U(eq)  |
|------|-----------|----------|----------|--------|
| F1   | 7820(30)  | 3303(13) | 1471(11) | 76(2)  |
| F2   | 4510(30)  | 2854(7)  | 1204(9)  | 127(5) |
| F3   | 1654(16)  | 3547(10) | 1837(10) | 118(5) |
| F1'  | 7760(40)  | 3199(15) | 1596(14) | 93(5)  |
| F2'  | 4370(20)  | 2810(6)  | 1273(9)  | 84(3)  |
| F3'  | 1676(19)  | 3702(12) | 1663(12) | 98(4)  |
| N1   | 4243(2)   | 5055(1)  | 4424(1)  | 39(1)  |
| C1   | 5034(3)   | 5536(1)  | 4983(1)  | 44(1)  |
| C2   | 5871(3)   | 6164(1)  | 4558(1)  | 46(1)  |
| C3   | 7217(2)   | 5886(1)  | 4023(1)  | 38(1)  |
| C4   | 6792(2)   | 5189(1)  | 3615(1)  | 36(1)  |
| C5   | 5800(2)   | 4657(1)  | 4126(1)  | 36(1)  |
| C6   | 6923(2)   | 4463(1)  | 4798(1)  | 41(1)  |
| C7   | 6465(3)   | 5060(1)  | 5355(1)  | 47(1)  |
| C8   | 8753(3)   | 6255(1)  | 3915(1)  | 46(1)  |
| C9   | 9270(30)  | 6832(7)  | 4289(12) | 61(3)  |
| N2   | 9730(20)  | 7371(8)  | 4522(11) | 97(5)  |
| C10  | 10030(20) | 5972(12) | 3322(11) | 50(3)  |
| N3   | 11010(30) | 5790(12) | 2885(11) | 70(4)  |
| C9'  | 9050(20)  | 6991(6)  | 4298(10) | 49(2)  |
| N2'  | 9300(20)  | 7512(7)  | 4617(9)  | 71(2)  |
| C10' | 10060(30) | 6087(13) | 3453(11) | 47(2)  |
| N3'  | 11150(30) | 5954(12) | 3044(11) | 66(3)  |
| C11  | 5647(2)   | 5351(1)  | 2922(1)  | 40(1)  |
| C12  | 5349(2)   | 4665(1)  | 2480(1)  | 42(1)  |
| C13  | 3608(1)   | 4450(1)  | 2328(1)  | 58(1)  |
| C14  | 3296(2)   | 3836(1)  | 1904(1)  | 74(1)  |
| C15  | 4726(2)   | 3437(1)  | 1631(1)  | 70(1)  |
| C16  | 6468(2)   | 3652(1)  | 1783(1)  | 60(1)  |
| C17  | 6779(1)   | 4266(1)  | 2207(1)  | 50(1)  |
| C18  | 6455(3)   | 5933(1)  | 2442(1)  | 48(1)  |
| C19  | 5821(4)   | 6592(1)  | 2367(2)  | 61(1)  |
| C20  | 6549(5)   | 7154(2)  | 1855(2)  | 86(1)  |
| C21  | 2715(2)   | 3893(1)  | 5144(1)  | 38(1)  |
| C22  | 2673(2)   | 3984(1)  | 5891(1)  | 49(1)  |
| C23  | 3030(2)   | 3395(1)  | 6344(1)  | 54(1)  |
| C24  | 3430(2)   | 2716(1)  | 6049(1)  | 48(1)  |

|     |          |         |         |       |
|-----|----------|---------|---------|-------|
| C25 | 3472(2)  | 2625(1) | 5302(1) | 51(1) |
| C26 | 3115(2)  | 3214(1) | 4850(1) | 48(1) |
| C27 | 3764(4)  | 2063(2) | 6542(2) | 72(1) |
| S3  | 2370(5)  | 4599(2) | 4552(2) | 58(1) |
| O1  | 1212(11) | 5119(6) | 4869(8) | 69(3) |
| O2  | 1940(20) | 4263(8) | 3876(7) | 76(3) |
| S3' | 2325(5)  | 4672(2) | 4572(2) | 37(1) |
| O1' | 1247(15) | 5180(5) | 4998(8) | 58(2) |
| O2' | 1704(17) | 4400(7) | 3890(5) | 47(1) |

**Table S4.** Bond lengths [Å] and angles [°] for **4y**.

|         |           |
|---------|-----------|
| F1-C16  | 1.325(11) |
| F2-C15  | 1.337(9)  |
| F3-C14  | 1.344(10) |
| F1'-C16 | 1.322(14) |
| F2'-C15 | 1.350(10) |
| F3'-C14 | 1.314(11) |
| N1-C5   | 1.480(2)  |
| N1-C1   | 1.481(2)  |
| N1-S3'  | 1.621(4)  |
| N1-S3   | 1.649(4)  |
| C1-C2   | 1.527(3)  |
| C1-C7   | 1.543(3)  |
| C1-H1A  | 1.0000    |
| C2-C3   | 1.500(3)  |
| C2-H2A  | 0.9900    |
| C2-H2B  | 0.9900    |
| C3-C8   | 1.348(3)  |
| C3-C4   | 1.515(2)  |
| C4-C5   | 1.547(2)  |
| C4-C11  | 1.569(2)  |
| C4-H4A  | 1.0000    |
| C5-C6   | 1.540(2)  |
| C5-H5A  | 1.0000    |
| C6-C7   | 1.539(3)  |
| C6-H6A  | 0.9900    |
| C6-H6B  | 0.9900    |
| C7-H7A  | 0.9900    |
| C7-H7B  | 0.9900    |
| C8-C9   | 1.321(15) |
| C8-C10' | 1.333(17) |
| C8-C9'  | 1.537(11) |
| C8-C10  | 1.545(14) |

|          |            |
|----------|------------|
| C9-N2    | 1.131(12)  |
| C10-N3   | 1.137(12)  |
| C9'-N2'  | 1.137(11)  |
| C10'-N3' | 1.140(13)  |
| C11-C18  | 1.512(3)   |
| C11-C12  | 1.515(2)   |
| C11-H11A | 1.0000     |
| C12-C13  | 1.3900     |
| C12-C17  | 1.3900     |
| C13-C14  | 1.3900     |
| C13-H13A | 0.9500     |
| C14-C15  | 1.3900     |
| C15-C16  | 1.3900     |
| C16-C17  | 1.3900     |
| C17-H17A | 0.9500     |
| C18-C19  | 1.304(3)   |
| C18-H18A | 0.9500     |
| C19-C20  | 1.500(3)   |
| C19-H19A | 0.9500     |
| C20-H20A | 0.9800     |
| C20-H20B | 0.9800     |
| C20-H20C | 0.9800     |
| C21-C22  | 1.3900     |
| C21-C26  | 1.3900     |
| C21-S3   | 1.712(5)   |
| C21-S3'  | 1.799(4)   |
| C22-C23  | 1.3900     |
| C22-H22A | 0.9500     |
| C23-C24  | 1.3900     |
| C23-H23A | 0.9500     |
| C24-C25  | 1.3900     |
| C24-C27  | 1.523(2)   |
| C25-C26  | 1.3900     |
| C25-H25A | 0.9500     |
| C26-H26A | 0.9500     |
| C27-H27A | 0.9800     |
| C27-H27B | 0.9800     |
| C27-H27C | 0.9800     |
| S3-O1    | 1.415(9)   |
| S3-O2    | 1.429(11)  |
| S3'-O2'  | 1.432(10)  |
| S3'-O1'  | 1.461(9)   |
| C5-N1-C1 | 103.71(13) |

|            |            |
|------------|------------|
| C5-N1-S3'  | 123.15(17) |
| C1-N1-S3'  | 119.53(16) |
| C5-N1-S3   | 118.22(19) |
| C1-N1-S3   | 122.70(19) |
| N1-C1-C2   | 104.66(15) |
| N1-C1-C7   | 104.64(15) |
| C2-C1-C7   | 111.69(16) |
| N1-C1-H1A  | 111.8      |
| C2-C1-H1A  | 111.8      |
| C7-C1-H1A  | 111.8      |
| C3-C2-C1   | 111.01(15) |
| C3-C2-H2A  | 109.4      |
| C1-C2-H2A  | 109.4      |
| C3-C2-H2B  | 109.4      |
| C1-C2-H2B  | 109.4      |
| H2A-C2-H2B | 108.0      |
| C8-C3-C2   | 119.99(17) |
| C8-C3-C4   | 121.82(18) |
| C2-C3-C4   | 118.18(15) |
| C3-C4-C5   | 109.13(14) |
| C3-C4-C11  | 111.21(13) |
| C5-C4-C11  | 110.81(14) |
| C3-C4-H4A  | 108.5      |
| C5-C4-H4A  | 108.5      |
| C11-C4-H4A | 108.5      |
| N1-C5-C6   | 104.14(14) |
| N1-C5-C4   | 107.09(13) |
| C6-C5-C4   | 112.04(13) |
| N1-C5-H5A  | 111.1      |
| C6-C5-H5A  | 111.1      |
| C4-C5-H5A  | 111.1      |
| C7-C6-C5   | 104.69(14) |
| C7-C6-H6A  | 110.8      |
| C5-C6-H6A  | 110.8      |
| C7-C6-H6B  | 110.8      |
| C5-C6-H6B  | 110.8      |
| H6A-C6-H6B | 108.9      |
| C6-C7-C1   | 104.93(15) |
| C6-C7-H7A  | 110.8      |
| C1-C7-H7A  | 110.8      |
| C6-C7-H7B  | 110.8      |
| C1-C7-H7B  | 110.8      |
| H7A-C7-H7B | 108.8      |

|              |            |
|--------------|------------|
| C9-C8-C3     | 125.0(11)  |
| C10'-C8-C3   | 127.2(9)   |
| C10'-C8-C9'  | 113.0(12)  |
| C3-C8-C9'    | 119.6(8)   |
| C9-C8-C10    | 117.2(13)  |
| C3-C8-C10    | 117.8(8)   |
| N2-C9-C8     | 171(2)     |
| N3-C10-C8    | 177(2)     |
| N2'-C9'-C8   | 176.0(17)  |
| N3'-C10'-C8  | 178(3)     |
| C18-C11-C12  | 109.11(15) |
| C18-C11-C4   | 113.15(15) |
| C12-C11-C4   | 111.36(13) |
| C18-C11-H11A | 107.7      |
| C12-C11-H11A | 107.7      |
| C4-C11-H11A  | 107.7      |
| C13-C12-C17  | 120.0      |
| C13-C12-C11  | 118.79(10) |
| C17-C12-C11  | 121.18(10) |
| C12-C13-C14  | 120.0      |
| C12-C13-H13A | 120.0      |
| C14-C13-H13A | 120.0      |
| F3'-C14-C15  | 119.3(12)  |
| F3-C14-C15   | 117.7(9)   |
| F3'-C14-C13  | 119.8(11)  |
| F3-C14-C13   | 121.5(9)   |
| C15-C14-C13  | 120.0      |
| F2-C15-C16   | 117.2(8)   |
| F2'-C15-C16  | 121.5(7)   |
| F2-C15-C14   | 122.7(8)   |
| F2'-C15-C14  | 118.3(7)   |
| C16-C15-C14  | 120.0      |
| F1'-C16-C15  | 117.3(17)  |
| F1-C16-C15   | 119.3(14)  |
| F1'-C16-C17  | 122.1(17)  |
| F1-C16-C17   | 120.4(14)  |
| C15-C16-C17  | 120.0      |
| C16-C17-C12  | 120.0      |
| C16-C17-H17A | 120.0      |
| C12-C17-H17A | 120.0      |
| C19-C18-C11  | 124.7(2)   |
| C19-C18-H18A | 117.7      |
| C11-C18-H18A | 117.7      |

|               |            |
|---------------|------------|
| C18-C19-C20   | 124.7(3)   |
| C18-C19-H19A  | 117.7      |
| C20-C19-H19A  | 117.7      |
| C19-C20-H20A  | 109.5      |
| C19-C20-H20B  | 109.5      |
| H20A-C20-H20B | 109.5      |
| C19-C20-H20C  | 109.5      |
| H20A-C20-H20C | 109.5      |
| H20B-C20-H20C | 109.5      |
| C22-C21-C26   | 120.0      |
| C22-C21-S3    | 122.74(16) |
| C26-C21-S3    | 117.22(16) |
| C22-C21-S3'   | 119.01(12) |
| C26-C21-S3'   | 120.95(12) |
| C21-C22-C23   | 120.0      |
| C21-C22-H22A  | 120.0      |
| C23-C22-H22A  | 120.0      |
| C24-C23-C22   | 120.0      |
| C24-C23-H23A  | 120.0      |
| C22-C23-H23A  | 120.0      |
| C23-C24-C25   | 120.0      |
| C23-C24-C27   | 120.27(15) |
| C25-C24-C27   | 119.70(15) |
| C24-C25-C26   | 120.0      |
| C24-C25-H25A  | 120.0      |
| C26-C25-H25A  | 120.0      |
| C25-C26-C21   | 120.0      |
| C25-C26-H26A  | 120.0      |
| C21-C26-H26A  | 120.0      |
| C24-C27-H27A  | 109.5      |
| C24-C27-H27B  | 109.5      |
| H27A-C27-H27B | 109.5      |
| C24-C27-H27C  | 109.5      |
| H27A-C27-H27C | 109.5      |
| H27B-C27-H27C | 109.5      |
| O1-S3-O2      | 120.7(8)   |
| O1-S3-N1      | 103.8(5)   |
| O2-S3-N1      | 106.6(7)   |
| O1-S3-C21     | 109.7(6)   |
| O2-S3-C21     | 105.6(6)   |
| N1-S3-C21     | 110.2(3)   |
| O2'-S3'-O1'   | 121.1(8)   |
| O2'-S3'-N1    | 106.8(6)   |



|             |          |
|-------------|----------|
| O1'-S3'-N1  | 107.8(5) |
| O2'-S3'-C21 | 107.1(5) |
| O1'-S3'-C21 | 106.1(6) |
| N1-S3'-C21  | 107.4(2) |

**Table S5.** Anisotropic displacement parameters ( $\text{\AA}^2 \times 10^3$ ) for **4y**. The anisotropic displacement factor exponent takes the form:  $-2\pi^2 [ h^2 a^{*2} U^{11} + \dots + 2 h k a^* b^* U^{12} ]$

|      | U <sup>11</sup> | U <sup>22</sup> | U <sup>33</sup> | U <sup>23</sup> | U <sup>13</sup> | U <sup>12</sup> |
|------|-----------------|-----------------|-----------------|-----------------|-----------------|-----------------|
| F1   | 78(4)           | 81(5)           | 69(3)           | -21(3)          | 7(3)            | 16(3)           |
| F2   | 148(10)         | 125(7)          | 107(6)          | -71(6)          | -9(6)           | -22(6)          |
| F3   | 64(4)           | 162(12)         | 129(9)          | -68(7)          | 1(4)            | -47(6)          |
| F1'  | 88(7)           | 85(8)           | 106(13)         | -43(8)          | -6(7)           | 25(6)           |
| F2'  | 88(5)           | 68(4)           | 97(6)           | -27(4)          | -16(4)          | -17(4)          |
| F3'  | 73(5)           | 109(5)          | 111(8)          | -29(5)          | -46(6)          | -14(4)          |
| N1   | 25(1)           | 42(1)           | 50(1)           | 7(1)            | 0(1)            | -2(1)           |
| C1   | 36(1)           | 47(1)           | 49(1)           | -1(1)           | 3(1)            | -1(1)           |
| C2   | 42(1)           | 37(1)           | 59(1)           | -3(1)           | 3(1)            | -2(1)           |
| C3   | 31(1)           | 36(1)           | 47(1)           | 6(1)            | -5(1)           | -2(1)           |
| C4   | 27(1)           | 35(1)           | 44(1)           | 4(1)            | -1(1)           | 1(1)            |
| C5   | 28(1)           | 35(1)           | 44(1)           | 4(1)            | -3(1)           | -2(1)           |
| C6   | 30(1)           | 45(1)           | 47(1)           | 9(1)            | -4(1)           | 0(1)            |
| C7   | 42(1)           | 53(1)           | 45(1)           | 4(1)            | -5(1)           | -6(1)           |
| C8   | 31(1)           | 47(1)           | 58(1)           | 15(1)           | -9(1)           | -7(1)           |
| C9   | 56(6)           | 37(5)           | 88(5)           | 17(4)           | -19(4)          | -12(4)          |
| N2   | 101(10)         | 69(7)           | 121(8)          | -7(5)           | -8(7)           | -40(6)          |
| C10  | 22(3)           | 56(6)           | 71(8)           | 23(5)           | 3(5)            | -2(3)           |
| N3   | 43(5)           | 79(8)           | 87(9)           | 33(5)           | 22(6)           | 17(5)           |
| C9'  | 42(4)           | 32(4)           | 73(4)           | 12(4)           | -20(3)          | -11(4)          |
| N2'  | 73(6)           | 50(4)           | 89(5)           | -8(3)           | -24(5)          | -17(3)          |
| C10' | 35(3)           | 53(6)           | 55(5)           | 16(3)           | -8(3)           | -4(3)           |
| N3'  | 41(3)           | 82(9)           | 74(6)           | 25(4)           | 6(3)            | 7(4)            |
| C11  | 34(1)           | 42(1)           | 44(1)           | 7(1)            | -2(1)           | 2(1)            |
| C12  | 39(1)           | 46(1)           | 40(1)           | 6(1)            | -3(1)           | -2(1)           |
| C13  | 42(1)           | 75(1)           | 58(1)           | -9(1)           | -9(1)           | -3(1)           |
| C14  | 57(2)           | 91(2)           | 74(2)           | -20(1)          | -14(1)          | -16(1)          |
| C15  | 82(2)           | 70(2)           | 59(1)           | -16(1)          | -10(1)          | -11(1)          |
| C16  | 64(2)           | 62(1)           | 55(1)           | -7(1)           | -1(1)           | 5(1)            |
| C17  | 46(1)           | 55(1)           | 49(1)           | 2(1)            | 0(1)            | -1(1)           |
| C18  | 44(1)           | 50(1)           | 50(1)           | 14(1)           | -5(1)           | -5(1)           |
| C19  | 50(1)           | 57(1)           | 76(2)           | 23(1)           | -2(1)           | 2(1)            |
| C20  | 75(2)           | 75(2)           | 107(2)          | 48(2)           | -2(2)           | -5(2)           |

|     |       |       |        |       |        |        |
|-----|-------|-------|--------|-------|--------|--------|
| C21 | 29(1) | 44(1) | 43(1)  | 4(1)  | 2(1)   | -6(1)  |
| C22 | 52(1) | 47(1) | 47(1)  | -2(1) | 13(1)  | 0(1)   |
| C23 | 62(1) | 62(1) | 39(1)  | 4(1)  | 6(1)   | -4(1)  |
| C24 | 37(1) | 51(1) | 57(1)  | 12(1) | 2(1)   | -6(1)  |
| C25 | 52(1) | 40(1) | 62(1)  | -3(1) | 9(1)   | -6(1)  |
| C26 | 52(1) | 48(1) | 44(1)  | -4(1) | 5(1)   | -12(1) |
| C27 | 62(2) | 64(1) | 90(2)  | 32(1) | 1(1)   | -4(1)  |
| S3  | 23(1) | 68(2) | 83(2)  | 32(1) | -12(1) | -13(1) |
| O1  | 15(2) | 83(6) | 108(6) | 46(4) | 8(3)   | 10(3)  |
| O2  | 57(6) | 95(7) | 76(4)  | 33(4) | -36(4) | -38(5) |
| S3' | 28(1) | 39(1) | 45(1)  | 8(1)  | 1(1)   | 1(1)   |
| O1' | 46(4) | 43(2) | 85(4)  | 4(3)  | 15(3)  | 7(2)   |
| O2' | 32(2) | 58(3) | 51(2)  | 21(2) | -13(2) | -10(2) |

Table S6. Hydrogen coordinates ( $\times 10^4$ ) and isotropic displacement parameters ( $\text{\AA}^2 \times 10^3$ ) for **4y**.

|      | x    | y    | z    | U(eq) |
|------|------|------|------|-------|
| H1A  | 4115 | 5713 | 5335 | 53    |
| H2A  | 4923 | 6436 | 4299 | 55    |
| H2B  | 6461 | 6505 | 4898 | 55    |
| H4A  | 7941 | 4958 | 3462 | 43    |
| H5A  | 5415 | 4207 | 3863 | 43    |
| H6A  | 6599 | 3974 | 4985 | 49    |
| H6B  | 8214 | 4469 | 4682 | 49    |
| H7A  | 7536 | 5353 | 5475 | 56    |
| H7B  | 5991 | 4841 | 5806 | 56    |
| H11A | 4451 | 5530 | 3086 | 48    |
| H13A | 2630 | 4723 | 2514 | 70    |
| H17A | 7970 | 4413 | 2311 | 60    |
| H18A | 7499 | 5810 | 2176 | 58    |
| H19A | 4826 | 6727 | 2658 | 73    |
| H20A | 5565 | 7371 | 1578 | 128   |
| H20B | 7394 | 6921 | 1521 | 128   |
| H20C | 7164 | 7536 | 2130 | 128   |
| H22A | 2400 | 4448 | 6093 | 58    |
| H23A | 3001 | 3457 | 6854 | 65    |
| H25A | 3746 | 2161 | 5101 | 61    |
| H26A | 3144 | 3152 | 4339 | 58    |
| H27A | 4724 | 1762 | 6338 | 108   |
| H27B | 2670 | 1771 | 6580 | 108   |
| H27C | 4114 | 2235 | 7023 | 108   |

---

Crystal structure data for compound 11b.

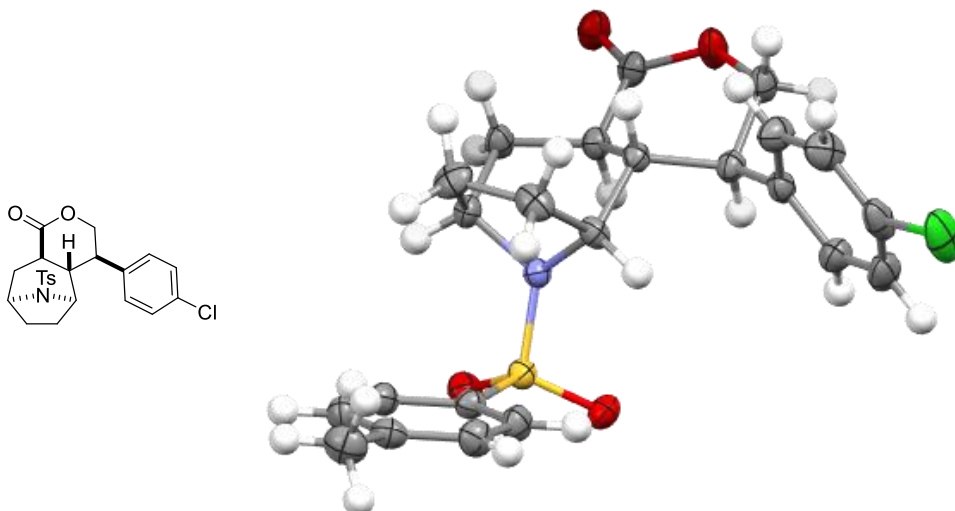

The stereochemistry is decided by anomalous dispersion and the value of the Flack  $x$  parameter: 0.01(2). In the final cycle of refinement, 6791 reflections (of which 6055 are observed with  $I > 2\sigma(I)$ ) were used to refine 248 parameters and the resulting  $R_1$ ,  $wR_2$  and  $S$  (goodness of fit) were 3.45%, 8.18% and 1.074, respectively. The refinement was carried out by minimizing the  $wR_2$  function using  $F^2$  rather than  $F$  values.  $R_1$  is calculated to provide a reference to the conventional  $R$  value but its function is not minimized.

**Table S7.** Crystal data and structure refinement for **11b**.

---

|                                 |                                                                  |                               |
|---------------------------------|------------------------------------------------------------------|-------------------------------|
| CCDC                            | 2193763                                                          |                               |
| Empirical formula               | $C_{23}H_{24}ClNO_4S$                                            |                               |
| Formula weight                  | 445.94                                                           |                               |
| Temperature                     | 100(2) K                                                         |                               |
| Wavelength                      | 0.71073 Å                                                        |                               |
| Crystal system                  | Monoclinic                                                       |                               |
| Space group                     | $P2_1$                                                           |                               |
| Unit cell dimensions            | $a = 11.1508(4)$ Å                                               | $\alpha = 90^\circ$ .         |
|                                 | $b = 6.3344(2)$ Å                                                | $\beta = 99.4170(10)^\circ$ . |
|                                 | $c = 15.0399(5)$ Å                                               | $\gamma = 90^\circ$ .         |
| Volume                          | $1048.01(6)$ Å <sup>3</sup>                                      |                               |
| $Z$                             | 2                                                                |                               |
| Density (calculated)            | $1.413$ Mg/m <sup>3</sup>                                        |                               |
| Absorption coefficient          | $0.313$ mm <sup>-1</sup>                                         |                               |
| $F(000)$                        | 468                                                              |                               |
| Theta range for data collection | $1.851$ to $32.747^\circ$ .                                      |                               |
| Index ranges                    | $-16 \leq h \leq 16$ , $-9 \leq k \leq 9$ , $-22 \leq l \leq 21$ |                               |
| Reflections collected           | 22288                                                            |                               |
| Independent reflections         | 6791 [ $R(\text{int}) = 0.0447$ ]                                |                               |

---

|                                                |                                                                                                             |
|------------------------------------------------|-------------------------------------------------------------------------------------------------------------|
| Completeness to theta = 25.242°                | 99.9 %                                                                                                      |
| Absorption correction                          | multi-scan                                                                                                  |
| Refinement method                              | Full-matrix least-squares on F <sup>2</sup>                                                                 |
| Data / restraints / parameters                 | 6791 / 1 / 248                                                                                              |
| Goodness-of-fit on F <sup>2</sup>              | 1.074                                                                                                       |
| Final R indices [I>2sigma(I)]                  | R1 = 0.0345, wR2 = 0.0818 [6055]                                                                            |
| R indices (all data)                           | R1 = 0.0426, wR2 = 0.0849                                                                                   |
| Absolute structure parameter                   | 0.01(2)                                                                                                     |
| Extinction coefficient                         | n/a                                                                                                         |
| Largest diff. peak and hole                    | 0.386 and -0.313 e.Å <sup>-3</sup>                                                                          |
| R1 = $\sum( F_o  -  F_c ) / \sum F_o $         | wR2 = $[\sum[w(F_o^2 - F_c^2)^2] / \sum[w(F_o^2)^2]]^{1/2}$                                                 |
| S = $[\sum[w(F_o^2 - F_c^2)^2] / (n-p)]^{1/2}$ | w = $1/[\sigma^2(F_o^2) + (m^*p)^2 + n^*p]$ , p = $[\max(F_o^2, 0) + 2^* F_c^2] / 3$ , m & n are constants. |

**Table S8.** Atomic coordinates (x 104) and equivalent isotropic displacement parameters (Å<sup>2</sup>x 10<sup>3</sup>) for **11b**. U(eq) is defined as one third of the trace of the orthogonalized U<sup>ij</sup> tensor.

|     | x        | y       | z       | U(eq) |
|-----|----------|---------|---------|-------|
| Cl1 | 2756(1)  | 4243(1) | -604(1) | 36(1) |
| S3  | 9450(1)  | 1896(1) | 2994(1) | 16(1) |
| O1  | 10385(1) | 1106(2) | 3685(1) | 21(1) |
| O2  | 8833(1)  | 514(2)  | 2312(1) | 21(1) |
| O3  | 4704(1)  | 1267(3) | 4652(1) | 23(1) |
| O4  | 6058(1)  | 1637(2) | 5871(1) | 22(1) |
| N1  | 8403(1)  | 2860(3) | 3516(1) | 15(1) |
| C1  | 8694(2)  | 4242(3) | 4322(1) | 17(1) |
| C2  | 7863(2)  | 3490(3) | 4986(1) | 18(1) |
| C3  | 6782(2)  | 2242(3) | 4478(1) | 16(1) |
| C4  | 6243(2)  | 3253(3) | 3576(1) | 15(1) |
| C5  | 7268(2)  | 3785(3) | 3024(1) | 16(1) |
| C6  | 7536(2)  | 6167(3) | 3044(1) | 22(1) |
| C7  | 8389(2)  | 6489(3) | 3954(1) | 24(1) |
| C8  | 5839(2)  | 1752(3) | 5059(1) | 17(1) |
| C9  | 4275(2)  | 1556(3) | 3690(1) | 20(1) |
| C10 | 5271(2)  | 1739(3) | 3105(1) | 17(1) |
| C11 | 4693(1)  | 2407(2) | 2159(1) | 18(1) |
| C12 | 4659(1)  | 1005(2) | 1444(1) | 22(1) |
| C13 | 4084(1)  | 1578(2) | 587(1)  | 27(1) |
| C14 | 3544(1)  | 3553(2) | 445(1)  | 26(1) |
| C15 | 3577(1)  | 4955(2) | 1160(1) | 27(1) |
| C16 | 4152(1)  | 4382(2) | 2016(1) | 23(1) |
| C17 | 10084(1) | 3960(2) | 2441(1) | 16(1) |
| C18 | 11029(1) | 5147(2) | 2912(1) | 19(1) |
| C19 | 11451(1) | 6919(2) | 2514(1) | 21(1) |
| C20 | 10929(1) | 7504(2) | 1646(1) | 20(1) |

|     |          |         |         |       |
|-----|----------|---------|---------|-------|
| C21 | 9985(1)  | 6316(2) | 1175(1) | 22(1) |
| C22 | 9562(1)  | 4544(2) | 1573(1) | 21(1) |
| C23 | 11329(2) | 9501(4) | 1226(2) | 28(1) |

**Table S9.** Bond lengths [Å] and angles [°] for **11b**.

|         |            |
|---------|------------|
| Cl1-C14 | 1.7321     |
| S3-O2   | 1.4352(14) |
| S3-O1   | 1.4366(14) |
| S3-N1   | 1.6284(17) |
| S3-C17  | 1.7590(10) |
| O3-C8   | 1.349(2)   |
| O3-C9   | 1.458(2)   |
| O4-C8   | 1.208(2)   |
| N1-C5   | 1.479(2)   |
| N1-C1   | 1.487(2)   |
| C1-C7   | 1.545(3)   |
| C1-C2   | 1.545(3)   |
| C1-H1   | 1.0000     |
| C2-C3   | 1.536(2)   |
| C2-H2A  | 0.9900     |
| C2-H2AB | 0.9900     |
| C3-C8   | 1.505(3)   |
| C3-C4   | 1.533(2)   |
| C3-H3   | 1.0000     |
| C4-C10  | 1.531(3)   |
| C4-C5   | 1.556(3)   |
| C4-H4   | 1.0000     |
| C5-C6   | 1.537(3)   |
| C5-H5   | 1.0000     |
| C6-C7   | 1.548(3)   |
| C6-H6A  | 0.9900     |
| C6-H6AB | 0.9900     |
| C7-H7A  | 0.9900     |
| C7-H7AB | 0.9900     |
| C9-C10  | 1.530(3)   |
| C9-H9A  | 0.9900     |
| C9-H9AB | 0.9900     |
| C10-C11 | 1.5238(19) |
| C10-H10 | 1.0000     |
| C11-C12 | 1.3900     |
| C11-C16 | 1.3900     |
| C12-C13 | 1.3900     |
| C12-H12 | 0.9500     |
| C13-C14 | 1.3900     |

---

|             |            |
|-------------|------------|
| C13-H13     | 0.9500     |
| C14-C15     | 1.3900     |
| C15-C16     | 1.3900     |
| C15-H15     | 0.9500     |
| C16-H16     | 0.9500     |
| C17-C18     | 1.3900     |
| C17-C22     | 1.3900     |
| C18-C19     | 1.3900     |
| C18-H18     | 0.9500     |
| C19-C20     | 1.3900     |
| C19-H19     | 0.9500     |
| C20-C21     | 1.3900     |
| C20-C23     | 1.513(2)   |
| C21-C22     | 1.3900     |
| C21-H21     | 0.9500     |
| C22-H22     | 0.9500     |
| C23-H23A    | 0.9800     |
| C23-H23B    | 0.9800     |
| C23-H23C    | 0.9800     |
| O2-S3-O1    | 120.73(9)  |
| O2-S3-N1    | 106.01(8)  |
| O1-S3-N1    | 105.92(8)  |
| O2-S3-C17   | 107.35(8)  |
| O1-S3-C17   | 107.49(8)  |
| N1-S3-C17   | 108.95(8)  |
| C8-O3-C9    | 123.51(15) |
| C5-N1-C1    | 103.28(14) |
| C5-N1-S3    | 121.94(12) |
| C1-N1-S3    | 122.38(12) |
| N1-C1-C7    | 104.17(15) |
| N1-C1-C2    | 105.75(15) |
| C7-C1-C2    | 113.28(17) |
| N1-C1-H1    | 111.1      |
| C7-C1-H1    | 111.1      |
| C2-C1-H1    | 111.1      |
| C3-C2-C1    | 109.98(14) |
| C3-C2-H2A   | 109.7      |
| C1-C2-H2A   | 109.7      |
| C3-C2-H2AB  | 109.7      |
| C1-C2-H2AB  | 109.7      |
| H2A-C2-H2AB | 108.2      |
| C8-C3-C4    | 112.93(15) |
| C8-C3-C2    | 112.56(15) |
| C4-C3-C2    | 112.82(15) |

---

---

|             |            |
|-------------|------------|
| C8-C3-H3    | 105.9      |
| C4-C3-H3    | 105.9      |
| C2-C3-H3    | 105.9      |
| C10-C4-C3   | 107.05(15) |
| C10-C4-C5   | 114.58(15) |
| C3-C4-C5    | 110.31(14) |
| C10-C4-H4   | 108.2      |
| C3-C4-H4    | 108.2      |
| C5-C4-H4    | 108.2      |
| N1-C5-C6    | 103.38(15) |
| N1-C5-C4    | 106.85(14) |
| C6-C5-C4    | 111.09(16) |
| N1-C5-H5    | 111.7      |
| C6-C5-H5    | 111.7      |
| C4-C5-H5    | 111.7      |
| C5-C6-C7    | 103.65(15) |
| C5-C6-H6A   | 111.0      |
| C7-C6-H6A   | 111.0      |
| C5-C6-H6AB  | 111.0      |
| C7-C6-H6AB  | 111.0      |
| H6A-C6-H6AB | 109.0      |
| C1-C7-C6    | 105.25(15) |
| C1-C7-H7A   | 110.7      |
| C6-C7-H7A   | 110.7      |
| C1-C7-H7AB  | 110.7      |
| C6-C7-H7AB  | 110.7      |
| H7A-C7-H7AB | 108.8      |
| O4-C8-O3    | 117.67(17) |
| O4-C8-C3    | 123.64(17) |
| O3-C8-C3    | 118.52(15) |
| O3-C9-C10   | 115.42(15) |
| O3-C9-H9A   | 108.4      |
| C10-C9-H9A  | 108.4      |
| O3-C9-H9AB  | 108.4      |
| C10-C9-H9AB | 108.4      |
| H9A-C9-H9AB | 107.5      |
| C11-C10-C9  | 108.84(14) |
| C11-C10-C4  | 114.65(15) |
| C9-C10-C4   | 107.90(15) |
| C11-C10-H10 | 108.4      |
| C9-C10-H10  | 108.4      |
| C4-C10-H10  | 108.4      |
| C12-C11-C16 | 120.0      |
| C12-C11-C10 | 119.93(11) |

---

---

|               |            |
|---------------|------------|
| C16-C11-C10   | 120.01(11) |
| C11-C12-C13   | 120.0      |
| C11-C12-H12   | 120.0      |
| C13-C12-H12   | 120.0      |
| C14-C13-C12   | 120.0      |
| C14-C13-H13   | 120.0      |
| C12-C13-H13   | 120.0      |
| C15-C14-C13   | 120.0      |
| C15-C14-C11   | 119.26(8)  |
| C13-C14-C11   | 120.65(8)  |
| C14-C15-C16   | 120.0      |
| C14-C15-H15   | 120.0      |
| C16-C15-H15   | 120.0      |
| C15-C16-C11   | 120.0      |
| C15-C16-H16   | 120.0      |
| C11-C16-H16   | 120.0      |
| C18-C17-C22   | 120.0      |
| C18-C17-S3    | 119.42(7)  |
| C22-C17-S3    | 120.23(7)  |
| C19-C18-C17   | 120.0      |
| C19-C18-H18   | 120.0      |
| C17-C18-H18   | 120.0      |
| C18-C19-C20   | 120.0      |
| C18-C19-H19   | 120.0      |
| C20-C19-H19   | 120.0      |
| C21-C20-C19   | 120.0      |
| C21-C20-C23   | 119.36(12) |
| C19-C20-C23   | 120.54(12) |
| C20-C21-C22   | 120.0      |
| C20-C21-H21   | 120.0      |
| C22-C21-H21   | 120.0      |
| C21-C22-C17   | 120.0      |
| C21-C22-H22   | 120.0      |
| C17-C22-H22   | 120.0      |
| C20-C23-H23A  | 109.5      |
| C20-C23-H23B  | 109.5      |
| H23A-C23-H23B | 109.5      |
| C20-C23-H23C  | 109.5      |
| H23A-C23-H23C | 109.5      |
| H23B-C23-H23C | 109.5      |

---



**Table S10.** Anisotropic displacement parameters ( $\text{\AA}^2 \times 10^3$ ) for lova3. The anisotropic displacement factor exponent takes the form:  $-2\pi^2 [h^2 a^{*2} U^{11} + \dots + 2 h k a^* b^* U^{12}]$ .

|     | U <sup>11</sup> | U <sup>22</sup> | U <sup>33</sup> | U <sup>23</sup> | U <sup>13</sup> | U <sup>12</sup> |
|-----|-----------------|-----------------|-----------------|-----------------|-----------------|-----------------|
| Cl1 | 26(1)           | 63(1)           | 17(1)           | 10(1)           | -5(1)           | -8(1)           |
| S3  | 16(1)           | 15(1)           | 15(1)           | 0(1)            | 1(1)            | 2(1)            |
| O1  | 18(1)           | 23(1)           | 21(1)           | 2(1)            | 0(1)            | 4(1)            |
| O2  | 24(1)           | 19(1)           | 19(1)           | -5(1)           | 2(1)            | -1(1)           |
| O3  | 20(1)           | 32(1)           | 16(1)           | 2(1)            | 0(1)            | -9(1)           |
| O4  | 24(1)           | 24(1)           | 16(1)           | 2(1)            | 1(1)            | -5(1)           |
| N1  | 14(1)           | 17(1)           | 14(1)           | 0(1)            | 0(1)            | 2(1)            |
| C1  | 17(1)           | 18(1)           | 16(1)           | -3(1)           | 0(1)            | -2(1)           |
| C2  | 16(1)           | 22(1)           | 13(1)           | 1(1)            | 1(1)            | -2(1)           |
| C3  | 16(1)           | 16(1)           | 15(1)           | 2(1)            | 0(1)            | 0(1)            |
| C4  | 14(1)           | 15(1)           | 15(1)           | 0(1)            | 0(1)            | 1(1)            |
| C5  | 14(1)           | 20(1)           | 15(1)           | 4(1)            | 2(1)            | 2(1)            |
| C6  | 20(1)           | 19(1)           | 28(1)           | 7(1)            | 4(1)            | 3(1)            |
| C7  | 32(1)           | 15(1)           | 25(1)           | 0(1)            | 6(1)            | 0(1)            |
| C8  | 19(1)           | 15(1)           | 17(1)           | 1(1)            | 1(1)            | -2(1)           |
| C9  | 18(1)           | 24(1)           | 16(1)           | 0(1)            | -2(1)           | -4(1)           |
| C10 | 17(1)           | 17(1)           | 16(1)           | -2(1)           | -1(1)           | 0(1)            |
| C11 | 14(1)           | 25(1)           | 15(1)           | -1(1)           | 0(1)            | -1(1)           |
| C12 | 22(1)           | 26(1)           | 19(1)           | -4(1)           | 3(1)            | -3(1)           |
| C13 | 25(1)           | 39(1)           | 16(1)           | -6(1)           | 1(1)            | -6(1)           |
| C14 | 16(1)           | 45(1)           | 15(1)           | 4(1)            | -1(1)           | -4(1)           |
| C15 | 24(1)           | 35(1)           | 20(1)           | 5(1)            | -1(1)           | 7(1)            |
| C16 | 23(1)           | 29(1)           | 17(1)           | -1(1)           | -1(1)           | 6(1)            |
| C17 | 17(1)           | 18(1)           | 14(1)           | 0(1)            | 2(1)            | 1(1)            |
| C18 | 16(1)           | 25(1)           | 15(1)           | -1(1)           | 0(1)            | 2(1)            |
| C19 | 18(1)           | 24(1)           | 20(1)           | -1(1)           | 2(1)            | -2(1)           |
| C20 | 20(1)           | 22(1)           | 20(1)           | 1(1)            | 6(1)            | 2(1)            |
| C21 | 21(1)           | 27(1)           | 16(1)           | 3(1)            | 0(1)            | 2(1)            |
| C22 | 19(1)           | 25(1)           | 16(1)           | 0(1)            | -2(1)           | -1(1)           |
| C23 | 31(1)           | 28(1)           | 28(1)           | 6(1)            | 9(1)            | 0(1)            |

**Table S11.** Hydrogen coordinates ( $\times 10^4$ ) and isotropic displacement parameters ( $\text{\AA}^2 \times 10^3$ ) for 11b.

|      | x    | y    | z    | U(eq) |
|------|------|------|------|-------|
| H1   | 9572 | 4123 | 4596 | 21    |
| H2A  | 8333 | 2584 | 5456 | 21    |
| H2AB | 7561 | 4725 | 5287 | 21    |
| H3   | 7119 | 848  | 4327 | 19    |
| H4   | 5835 | 4601 | 3702 | 18    |

|      |       |       |      |    |
|------|-------|-------|------|----|
| H5   | 7077  | 3237  | 2393 | 20 |
| H6A  | 6780  | 6997  | 3020 | 27 |
| H6AB | 7943  | 6584  | 2532 | 27 |
| H7A  | 9137  | 7246  | 3865 | 28 |
| H7AB | 7976  | 7310  | 4376 | 28 |
| H9A  | 3770  | 2849  | 3608 | 24 |
| H9AB | 3744  | 350   | 3470 | 24 |
| H10  | 5649  | 318   | 3069 | 20 |
| H12  | 5029  | -345  | 1541 | 27 |
| H13  | 4061  | 619   | 99   | 32 |
| H15  | 3208  | 6304  | 1063 | 32 |
| H16  | 4175  | 5341  | 2505 | 28 |
| H18  | 11385 | 4748  | 3505 | 23 |
| H19  | 12097 | 7731  | 2836 | 25 |
| H21  | 9628  | 6716  | 582  | 26 |
| H22  | 8917  | 3732  | 1251 | 25 |
| H23A | 11606 | 9156  | 658  | 42 |
| H23B | 11996 | 10156 | 1640 | 42 |
| H23C | 10643 | 10486 | 1109 | 42 |

---

## References

- 1 M. S. Abaee and S. Cheraghi, *Turkish J. Chem.*, 2014, **38**, 650–660.
- 2 E. Fereyduni, O. Lahtigui, J. N. Sanders, B. M. Tomiczek, M. D. Mannchen, R. A. Yu, K. N. Houk and A. J. Grenning, *J. Org. Chem.*, 2021, **86**, 2632–2643.
- 3 O. Lahtigui, F. Emmetiere, W. Zhang, L. Jirno, S. Toledo-Roy, J. C. Hershberger, J. M. Macho and A. J. Grenning, *Angew. Chem. Int. Ed.*, 2016, **55**, 15792–15796.
- 4 S. K. Scott, J. N. Sanders, K. E. White, R. A. Yu, K. N. Houk and A. J. Grenning, *J. Am. Chem. Soc.*, 2018, **140**, 16134–16139.
- 5 B. Föhlich, E. Gehrlach and R. Herter, *Angew. Chem. Int. Ed.*, 1982, **21**, 137–137.
- 6 E. Semenova, O. Lahtigui, S. K. Scott, M. Albritton, K. A. Abboud, I. Ghiviriga, A. E. Roitberg and A. J. Grenning, *Chem. Commun.*, 2020, **56**, 11779–11782.
- 7 B. M. Trost, D. L. Van Vranken and C. Bingel, *J. Am. Chem. Soc.*, 1992, **114**, 9327–9343.
- 8 D. R. Deardorff, C. M. Taniguchi, S. A. Tafti, H. Y. Kim, So Young Choi, K. J. Downey and T. V. Nguyen, *J. Org. Chem.*, 2001, **66**, 7191–7194.
- 9 G. R. Fulmer, A. J. M. Miller, N. H. Sherden, H. E. Gottlieb, A. Nudelman, B. M. Stoltz, J. E. Bercaw and K. I. Goldberg, *Organometallics*, 2010, **29**, 2176–2179.
- 10 G. L. Ellis, R. Amewu, S. Sabbani, P. A. Stocks, A. Shone, D. Stanford, P. Gibbons, J. Davies, L. Vivas, S. Charnaud, E. Bongard, C. Hall, K. Rimmer, S. Lozanom, M. Jesús, D. Gargallo, S. A. Ward and P. M. O'Neill, *J. Med. Chem.*, 2008, **51**, 2170–2177.
- 11 H. Kubas, U. Meyer, M. Hechenberger, K.-U. Klein, P. Plitt, R. Zemribo, H. W. Spexgoor, S. G. A. van Assema and U. Abel, *Bioorg. Med. Chem. Lett.*, 2013, **23**, 6370–6376.
- 12 H. Le, A. Batten and J. P. Morken, *Org. Lett.*, 2014, **16**, 2096–2099.
- 13 C. Li, J. Xing, J. Zhao, P. Huynh, W. Zhang, P. Jiang and Y. J. Zhang, *Org. Lett.*, 2012, **14**, 390–393.
- 14 S. Akai, R. Hanada, N. Fujiwara, Y. Kita and M. Egi, *Org. Lett.*, 2010, **12**, 4900–4903.
- 15 M. Tarbe, J. J. Miles, E. S. J. Edwards, K. M. Miles, A. K. Sewell, B. M. Baker and S. Quideau, *ChemMedChem*, 2020, **15**, 799–807.
- 16 G. Barker, D. G. Johnson, P. C. Young, S. A. Macgregor and A. L. Lee, *Chem. - A Eur. J.*, 2015, **21**, 13748–13757.
- 17 J. Li, M. J. Lear and Y. Hayashi, *Angew. Chem. Int. Ed.*, 2016, **55**, 9060–9064.
- 18 G. M. Sheldrick, *Acta Crystallogr. Sect. C Struct. Chem.*, 2015, **71**, 3–8.

# NMR spectra

<sup>1</sup>H NMR (400 MHz, CDCl<sub>3</sub>) of **1a**

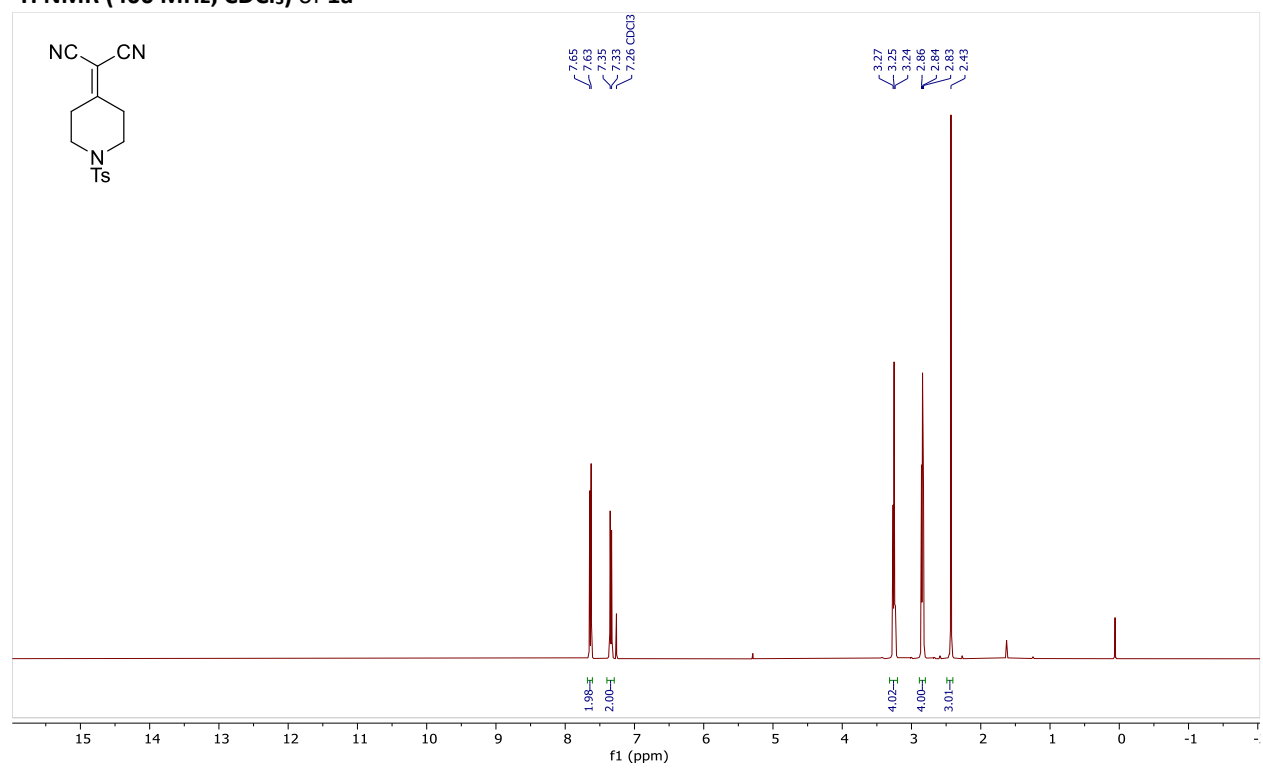

**<sup>13</sup>C NMR (101 MHz, CDCl<sub>3</sub>) of 1a**

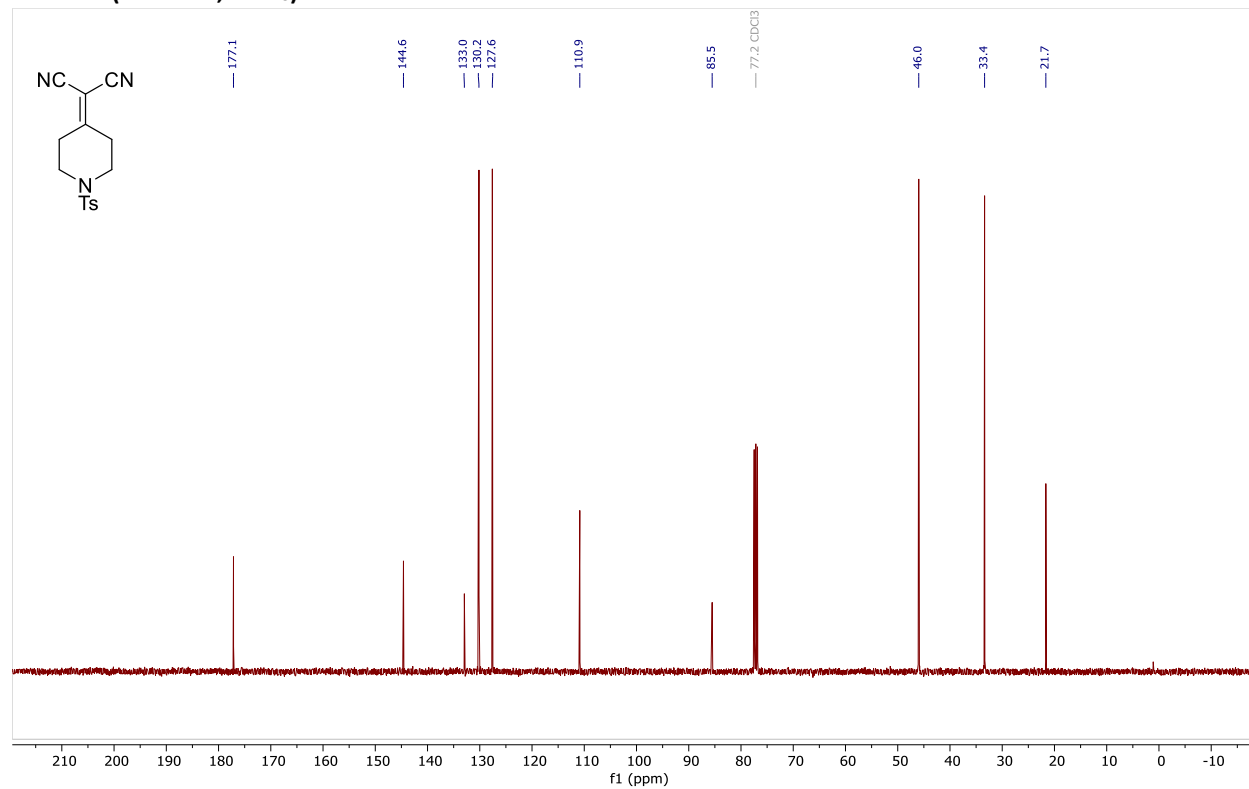

**<sup>1</sup>H NMR (400 MHz, CDCl<sub>3</sub>) of 1f**

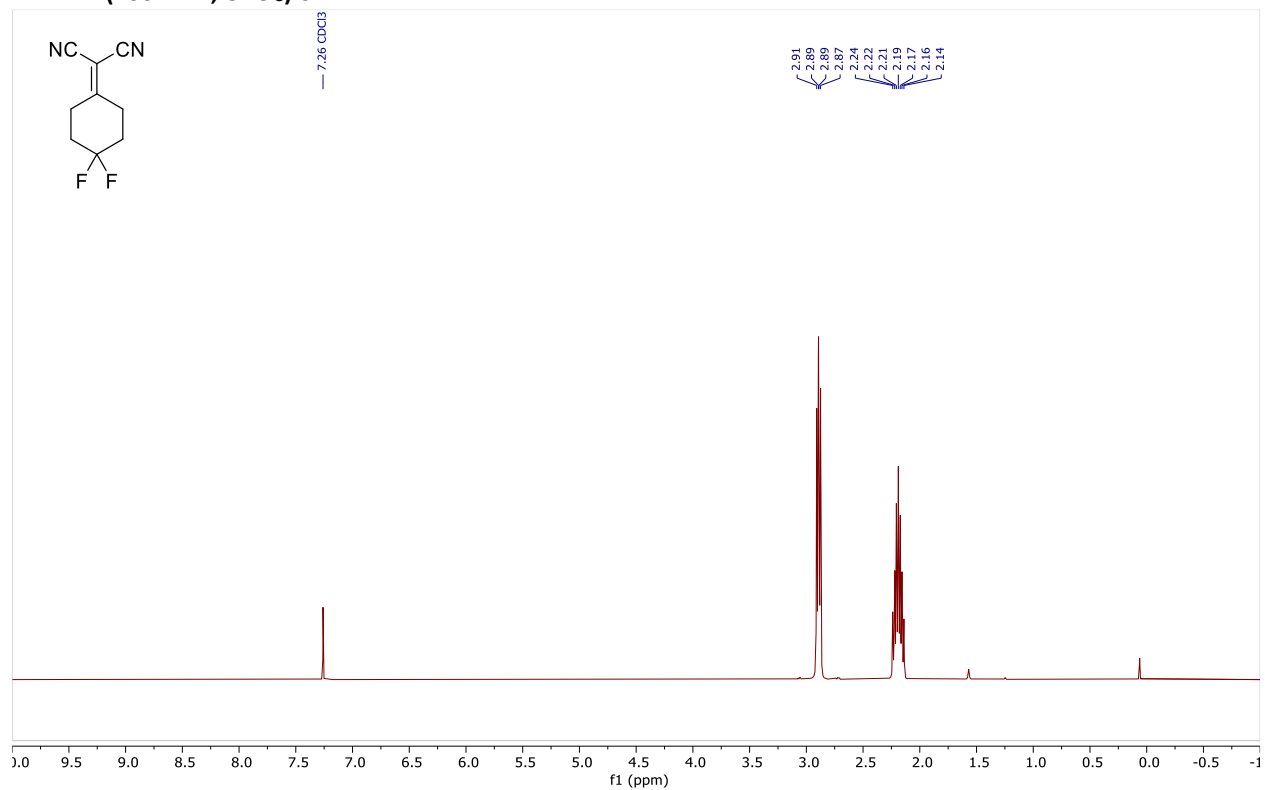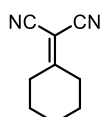

<sup>13</sup>C NMR (101 MHz, CDCl<sub>3</sub>) of 1f

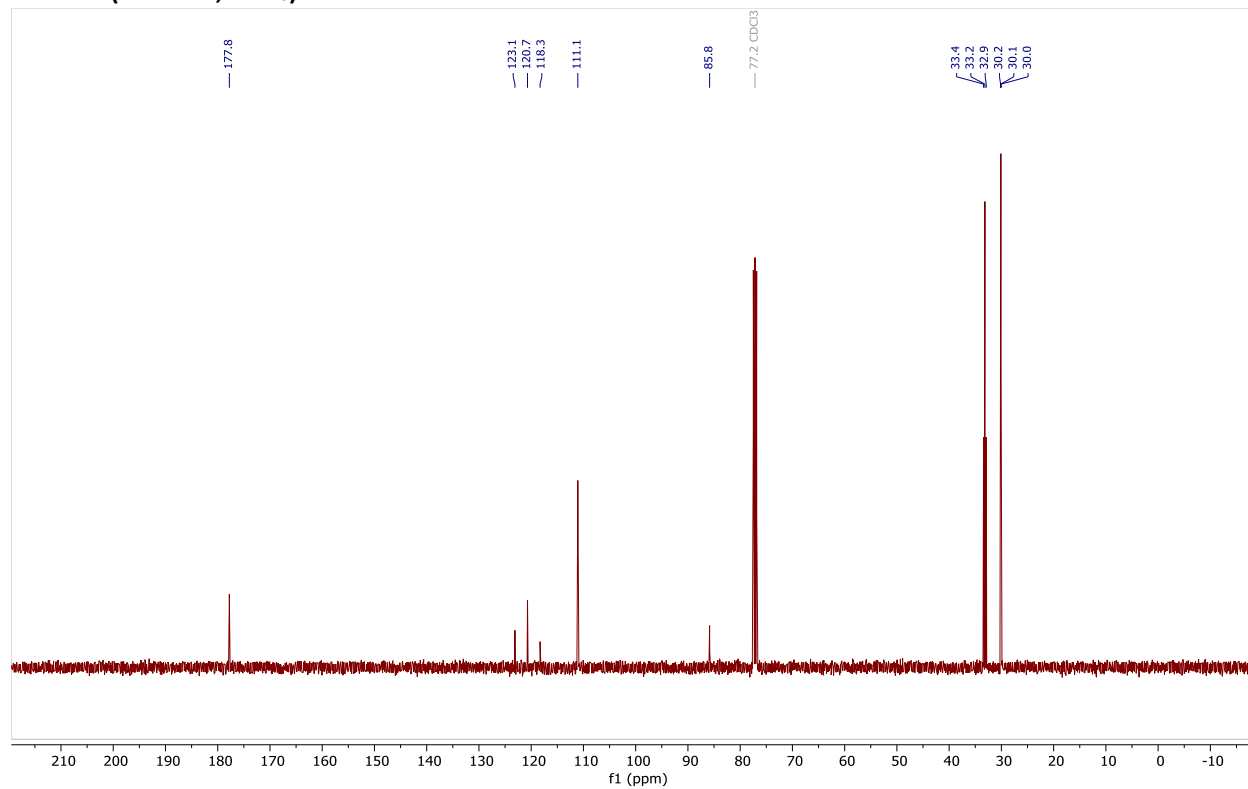

<sup>19</sup>F NMR (377 MHz, CDCl<sub>3</sub>) of 1f

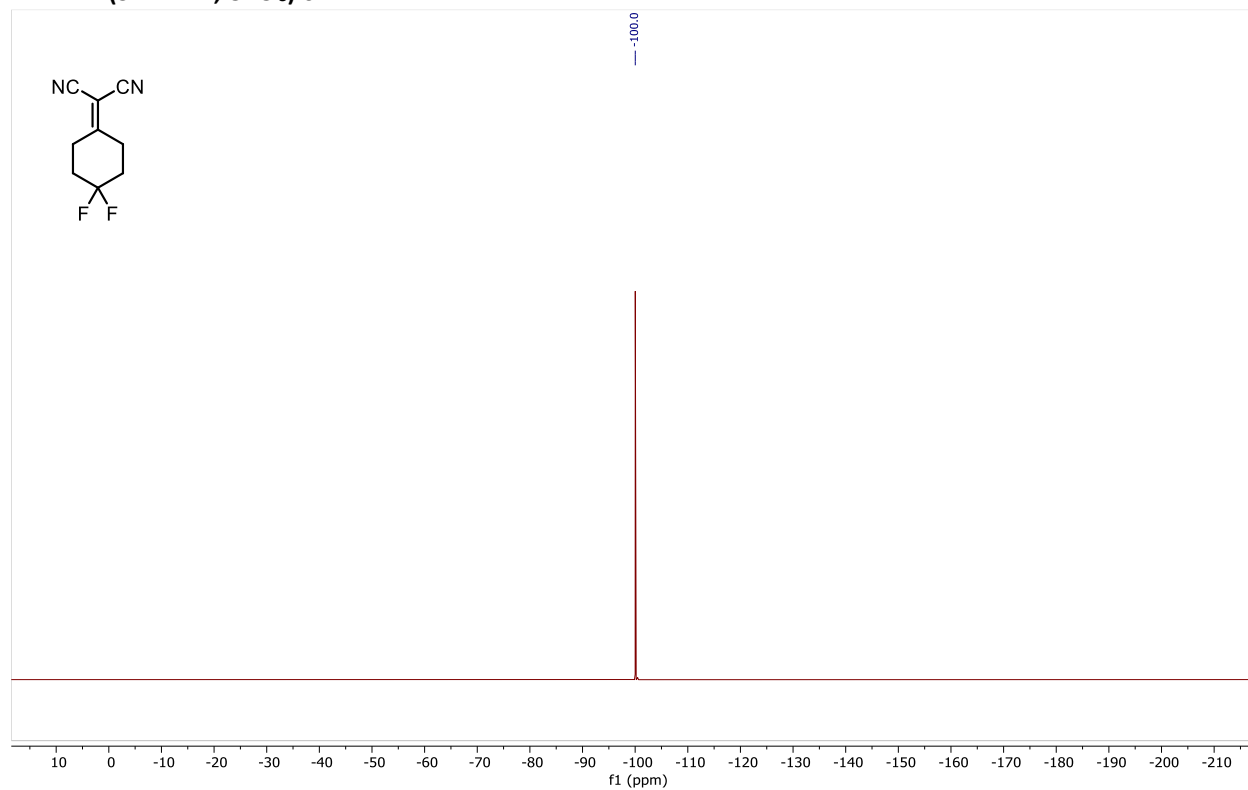

**<sup>1</sup>H NMR (600 MHz, CDCl<sub>3</sub>) of 1g**

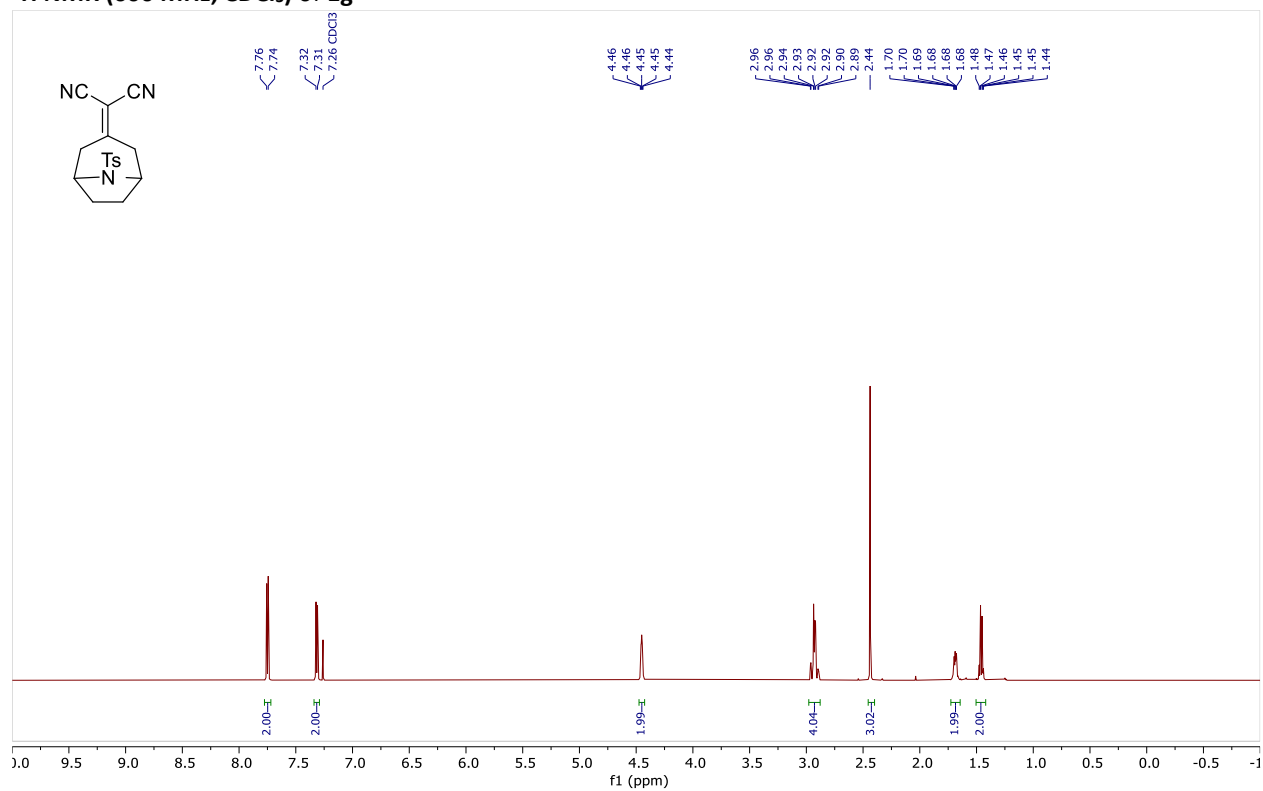

**<sup>13</sup>C NMR (101 MHz, CDCl<sub>3</sub>) of 1g**

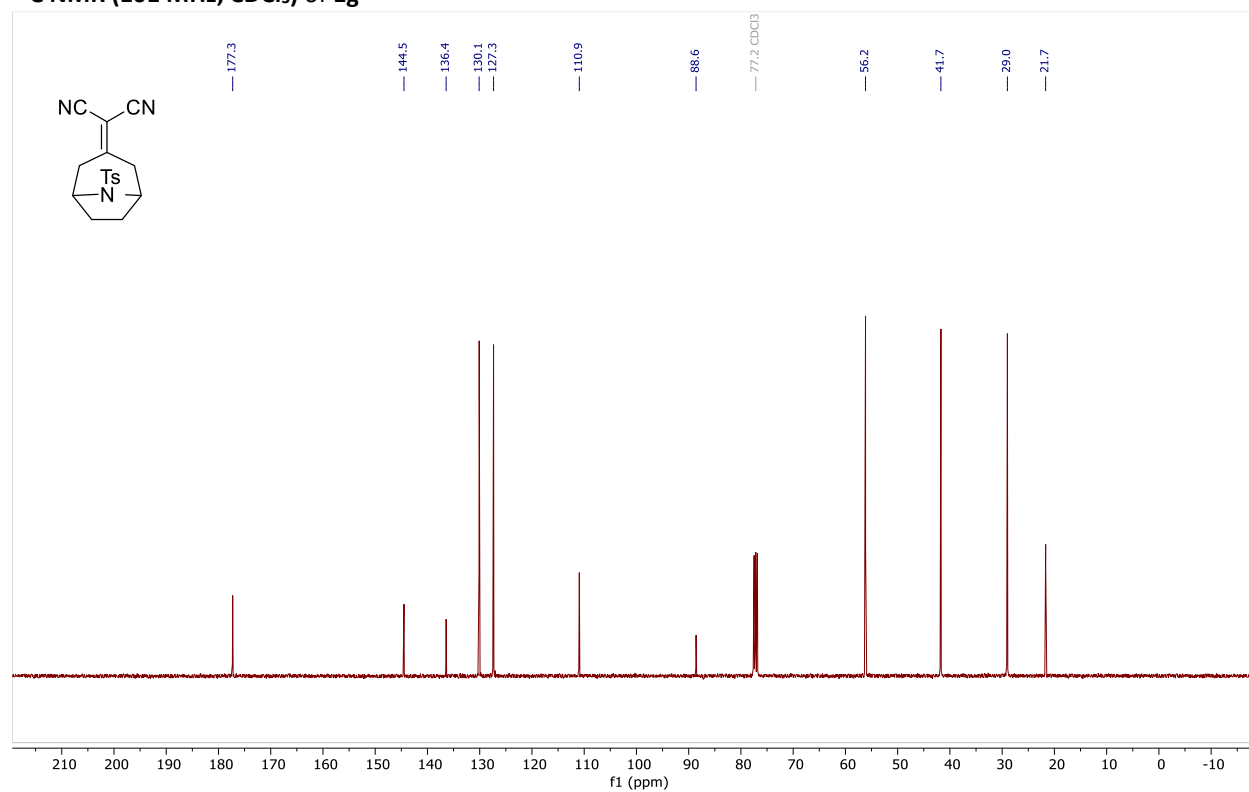

**<sup>1</sup>H NMR (600 MHz, CDCl<sub>3</sub>) of SI-1**

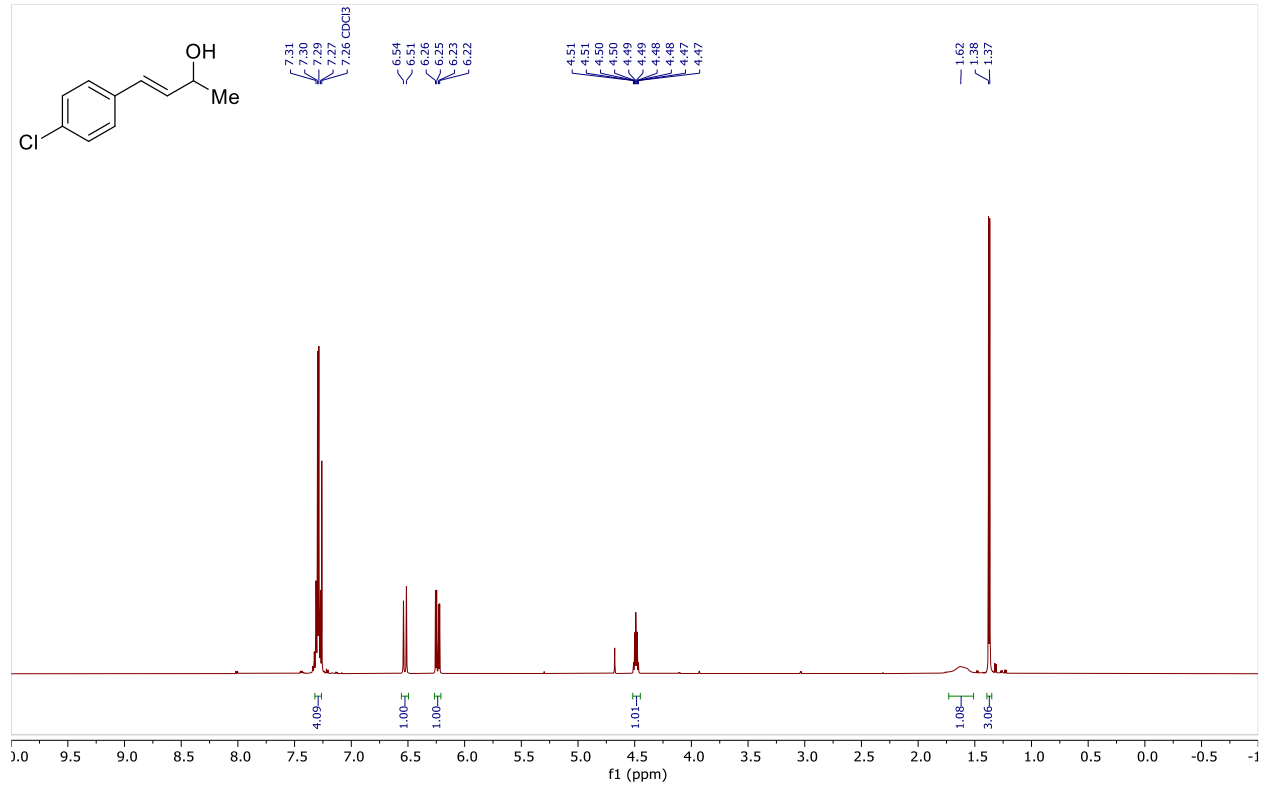

**<sup>13</sup>C NMR (101 MHz, CDCl<sub>3</sub>) of SI-1**

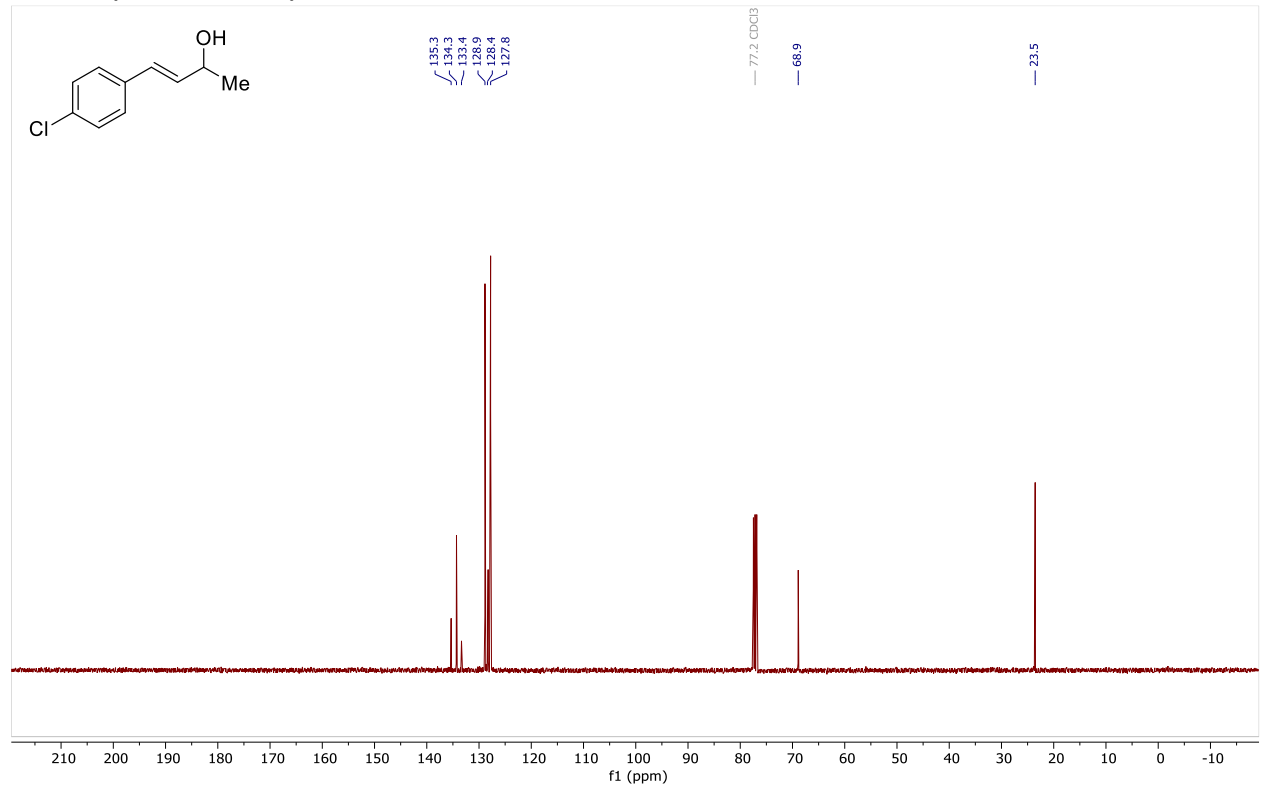



**<sup>1</sup>H NMR (400 MHz, CDCl<sub>3</sub>) of SI-2**

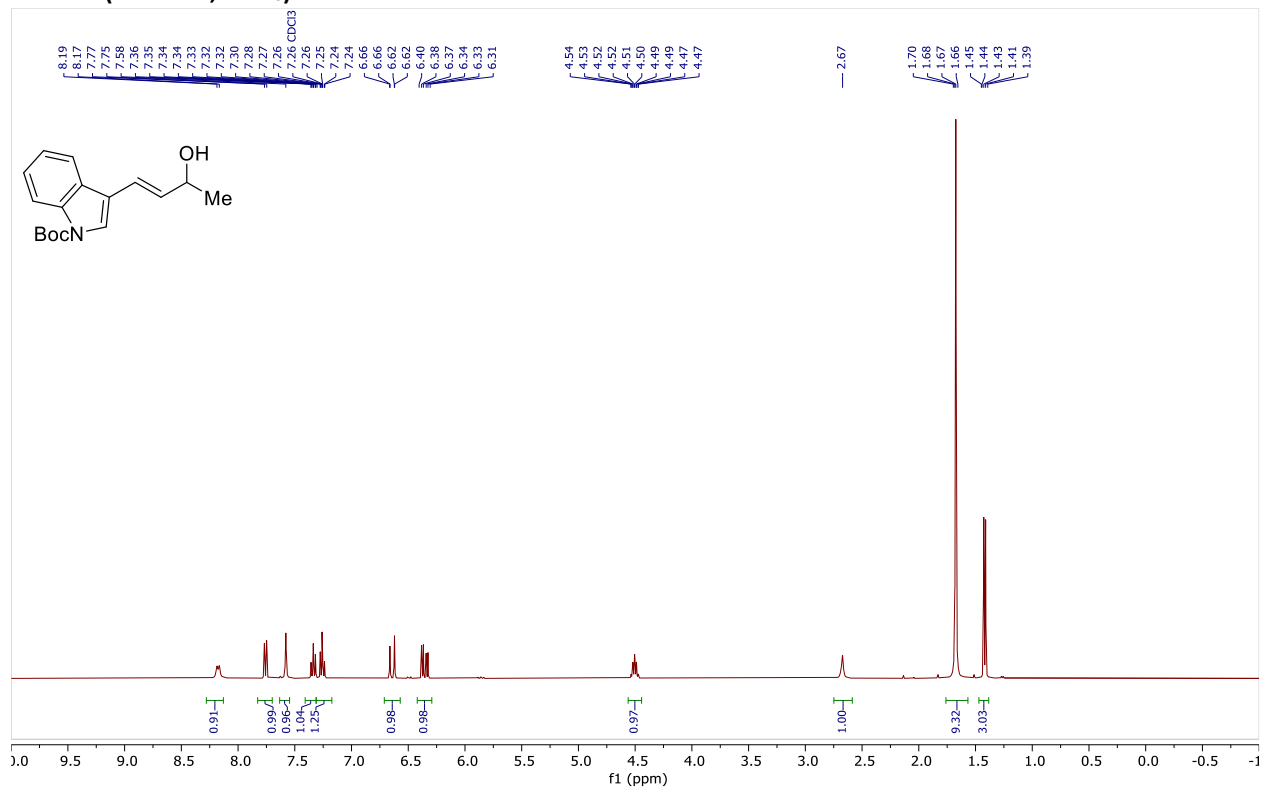

**<sup>13</sup>C NMR (101 MHz, CDCl<sub>3</sub>) SI-2**

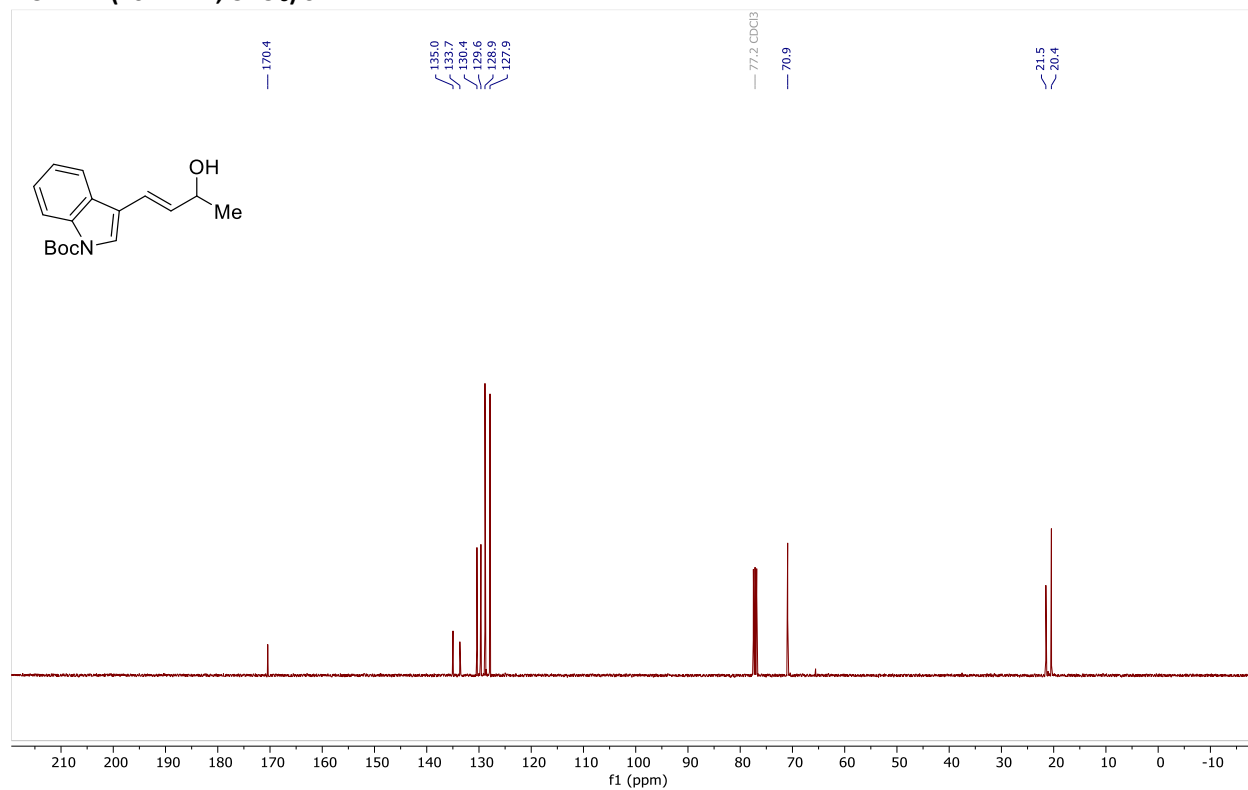

<sup>1</sup>H NMR (600 MHz, CDCl<sub>3</sub>) of *rac-2a*

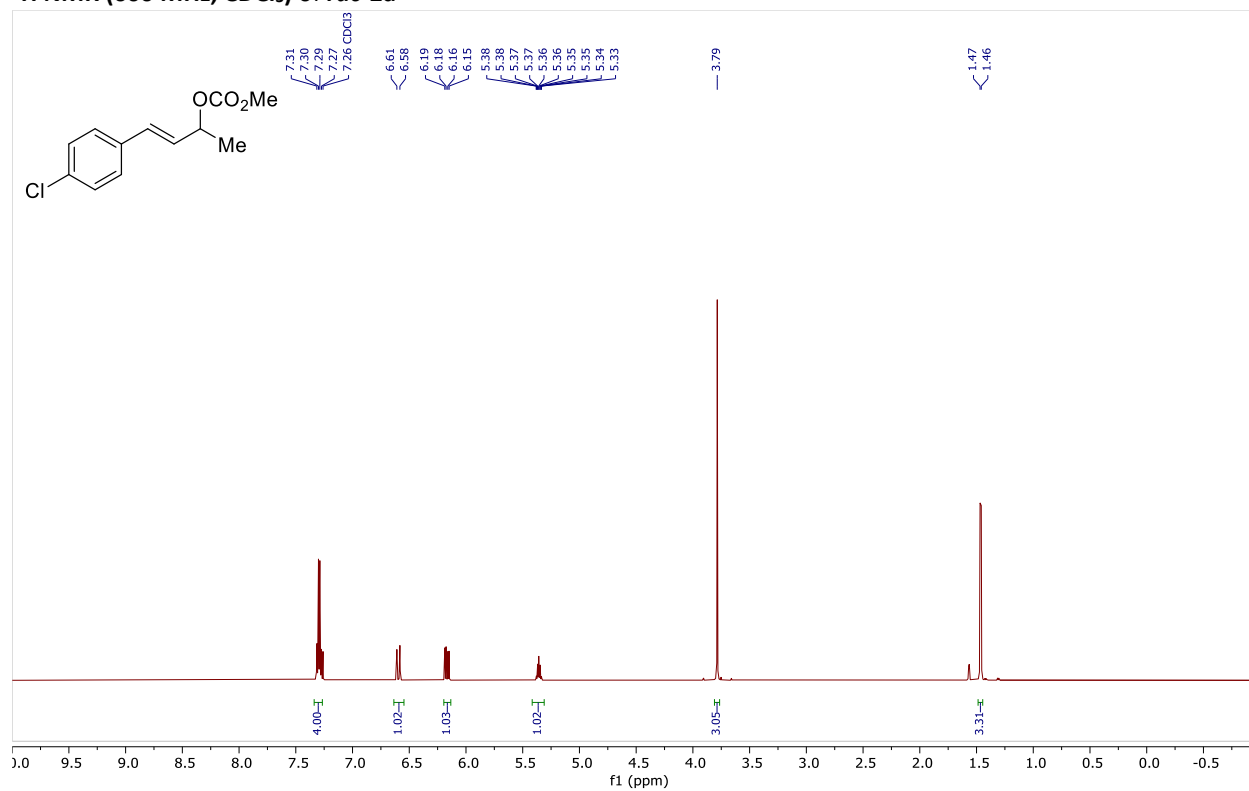

<sup>13</sup>C NMR (101 MHz, CDCl<sub>3</sub>) of *rac-2a*

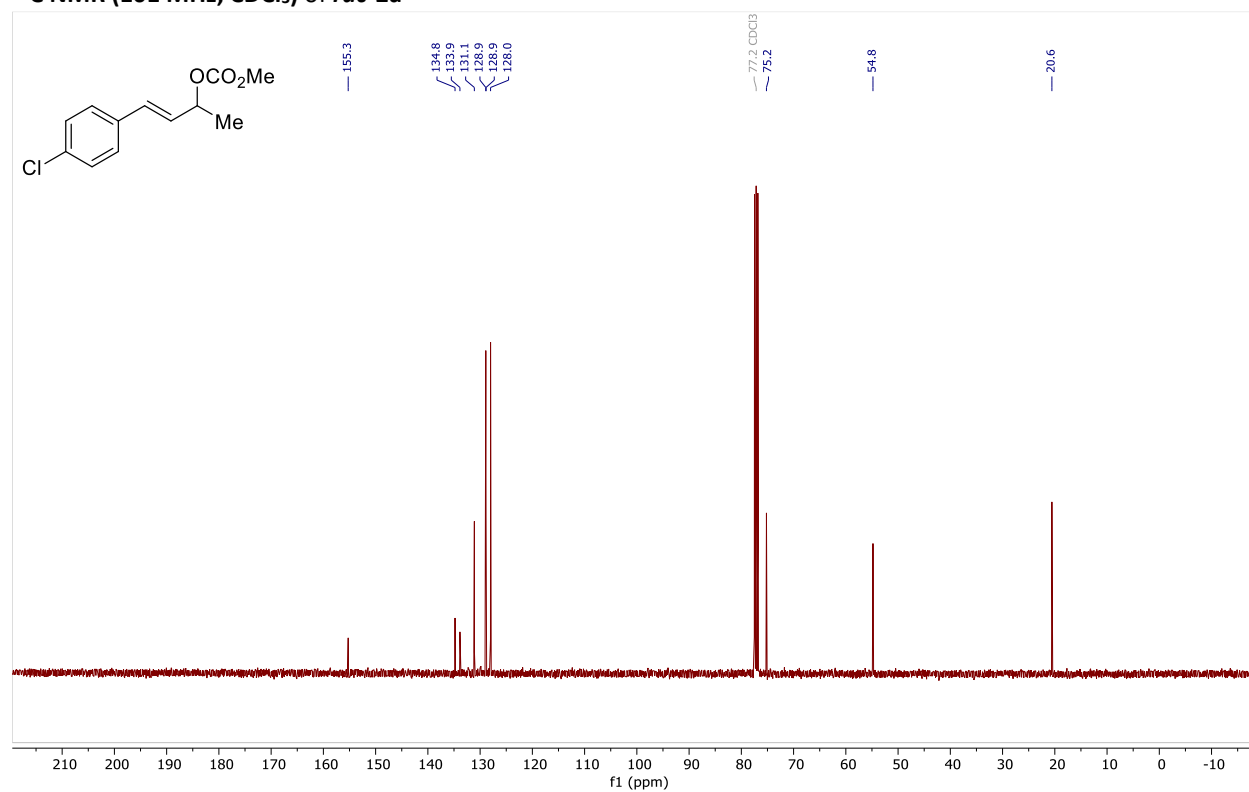

<sup>1</sup>H NMR (400 MHz, CDCl<sub>3</sub>) of *rac*-2a-Boc

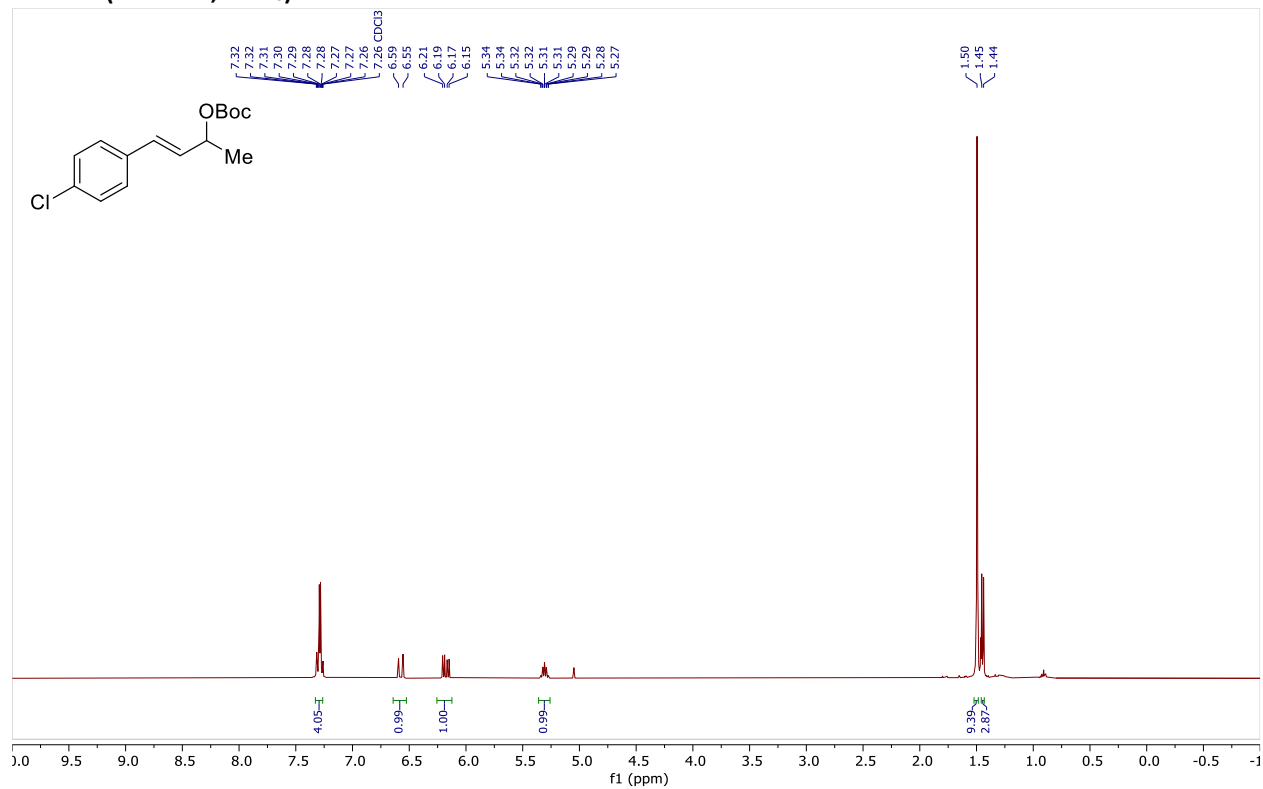

<sup>13</sup>C NMR (101 MHz, CDCl<sub>3</sub>) of *rac*-2a-Boc

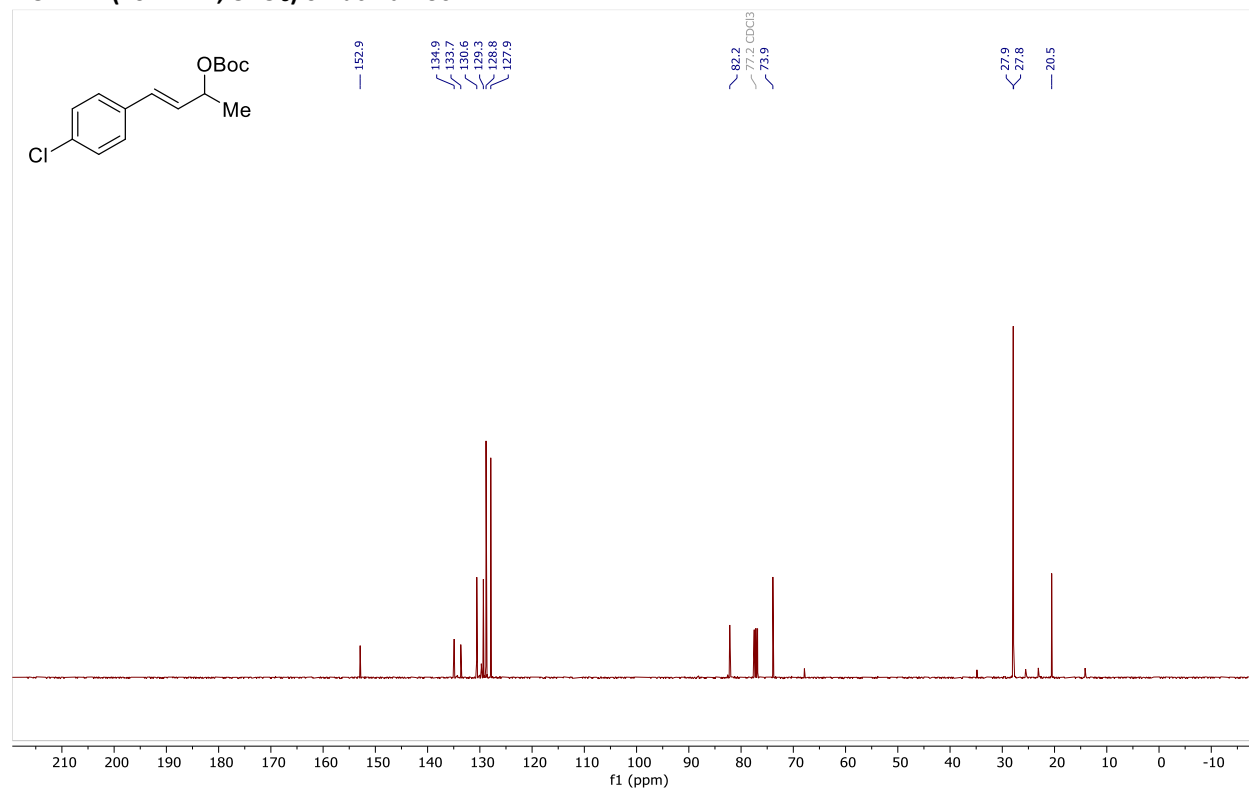

<sup>1</sup>H NMR (400 MHz, CDCl<sub>3</sub>) of *rac*-2a-Ac

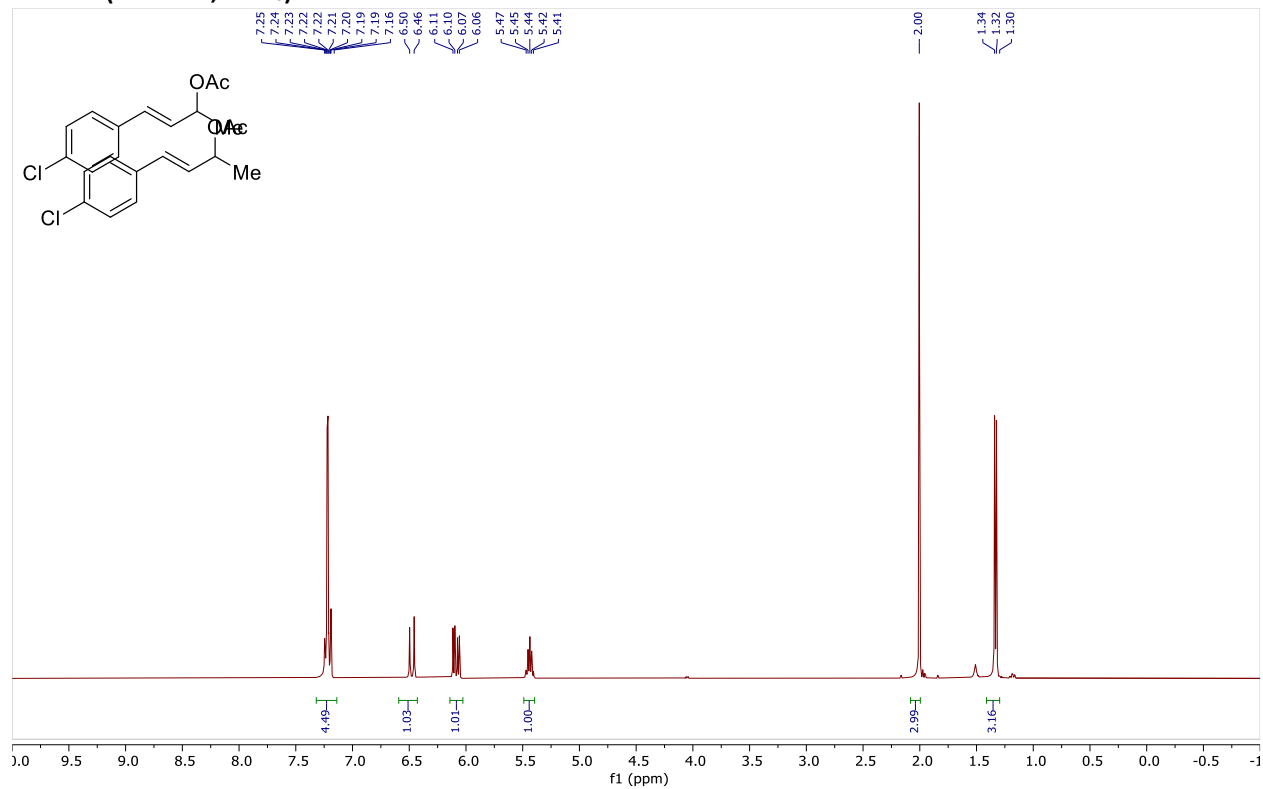

<sup>13</sup>C NMR (101 MHz, CDCl<sub>3</sub>) of *rac*-2a-Ac

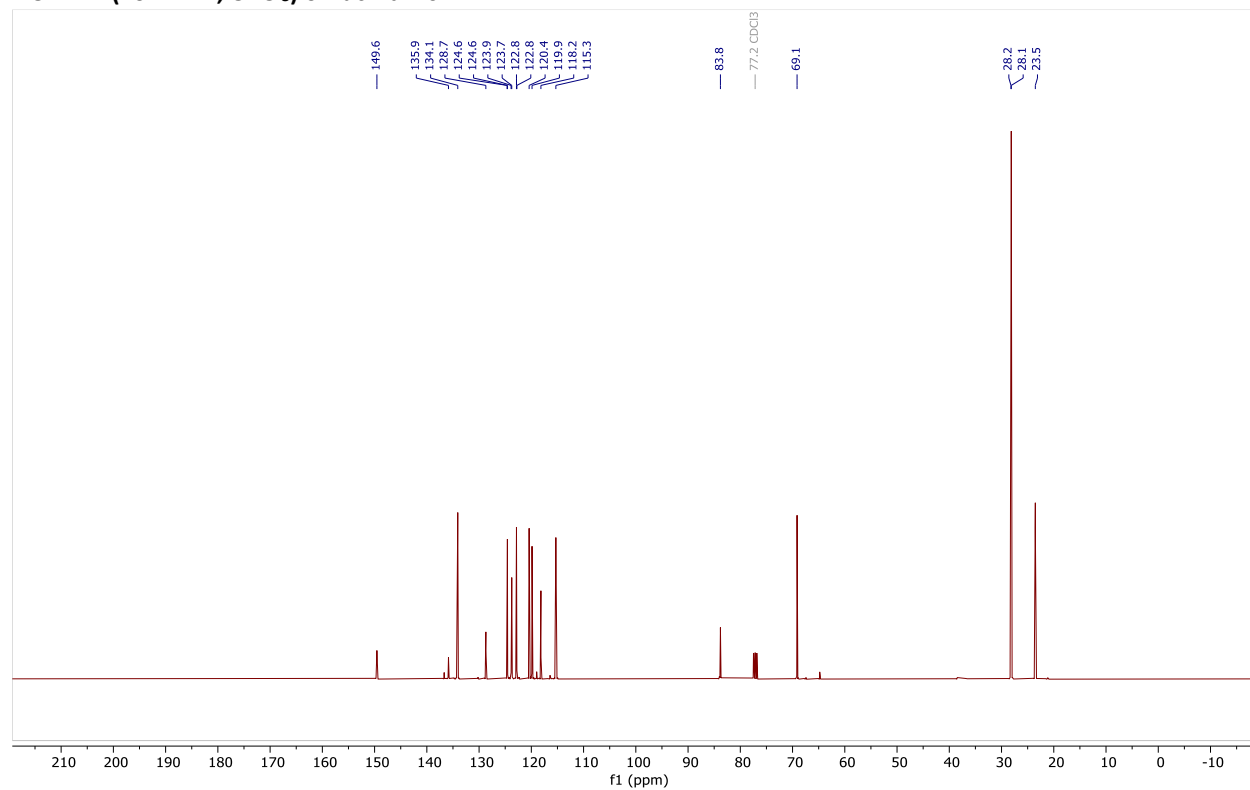

**<sup>1</sup>H NMR (400 MHz, CDCl<sub>3</sub>) of *rac-2b***

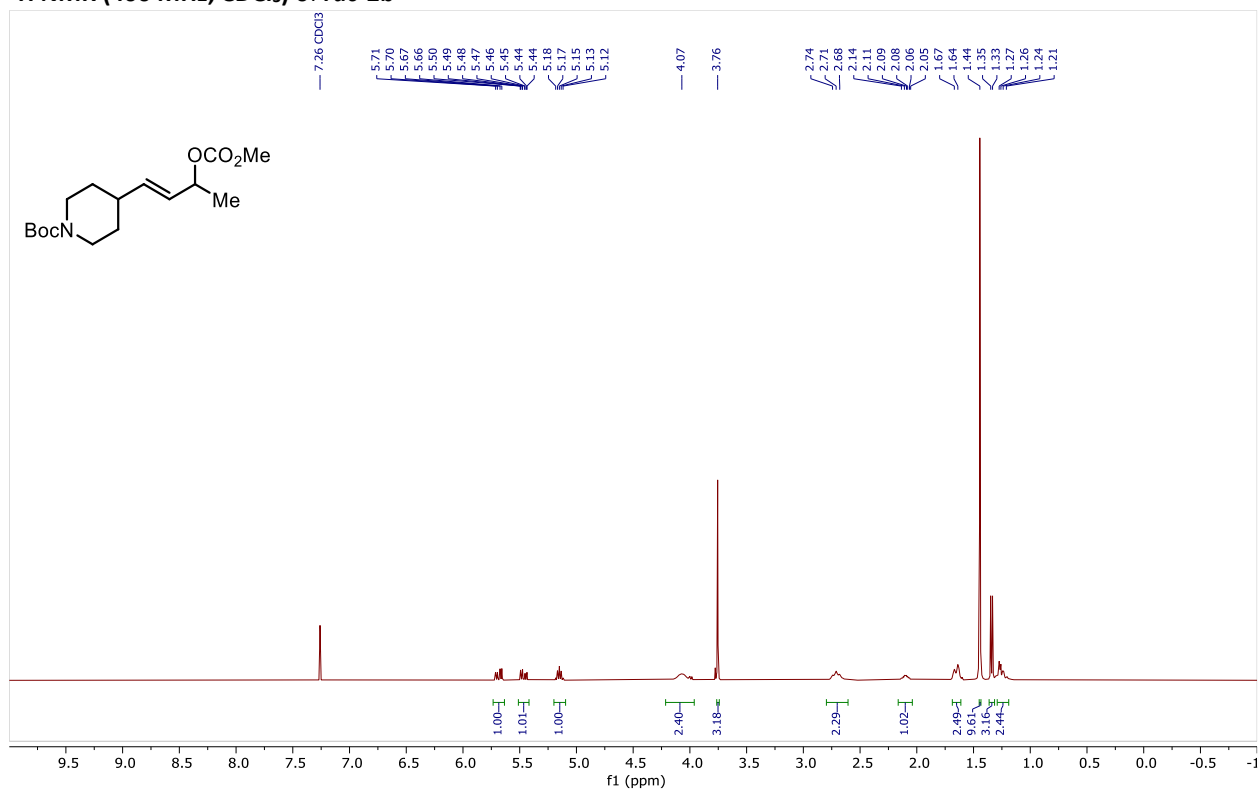

**<sup>13</sup>C NMR (101 MHz, CDCl<sub>3</sub>) of *rac-2b***

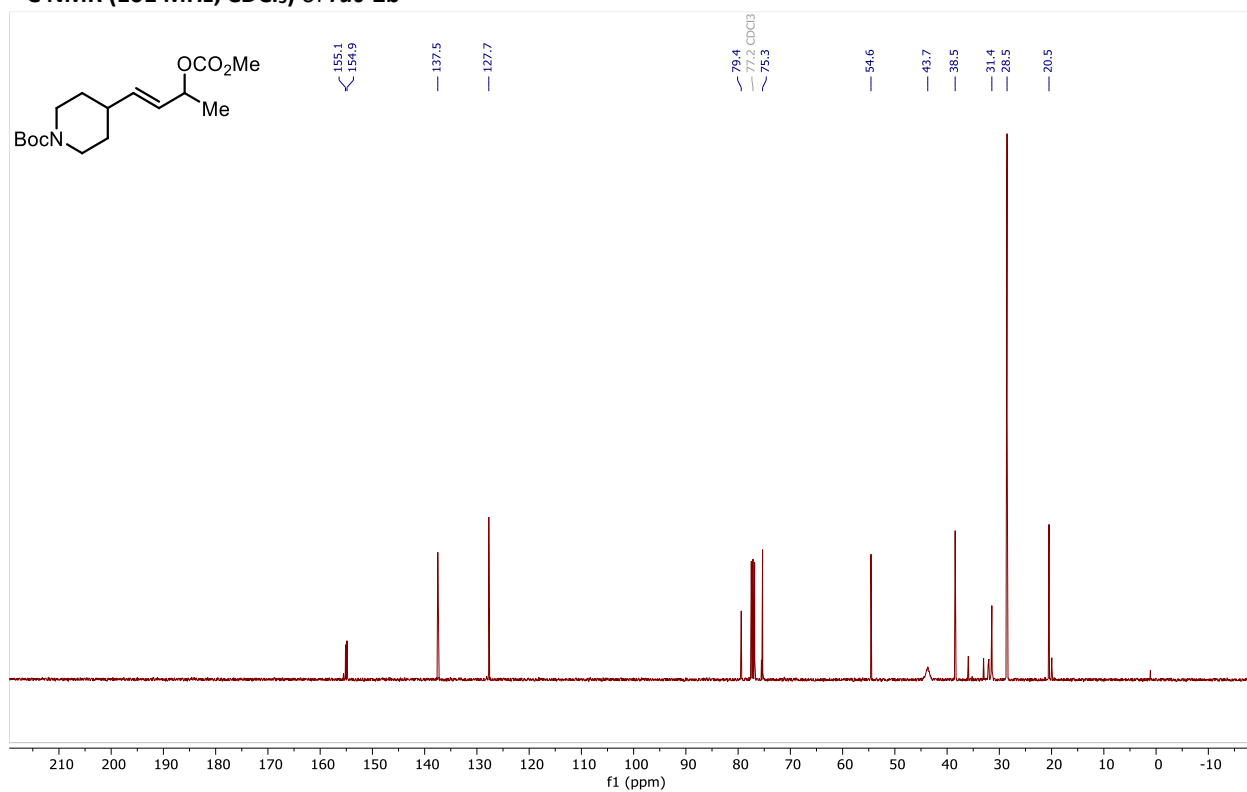

<sup>1</sup>H NMR (600 MHz, CDCl<sub>3</sub>) of *rac*-2c

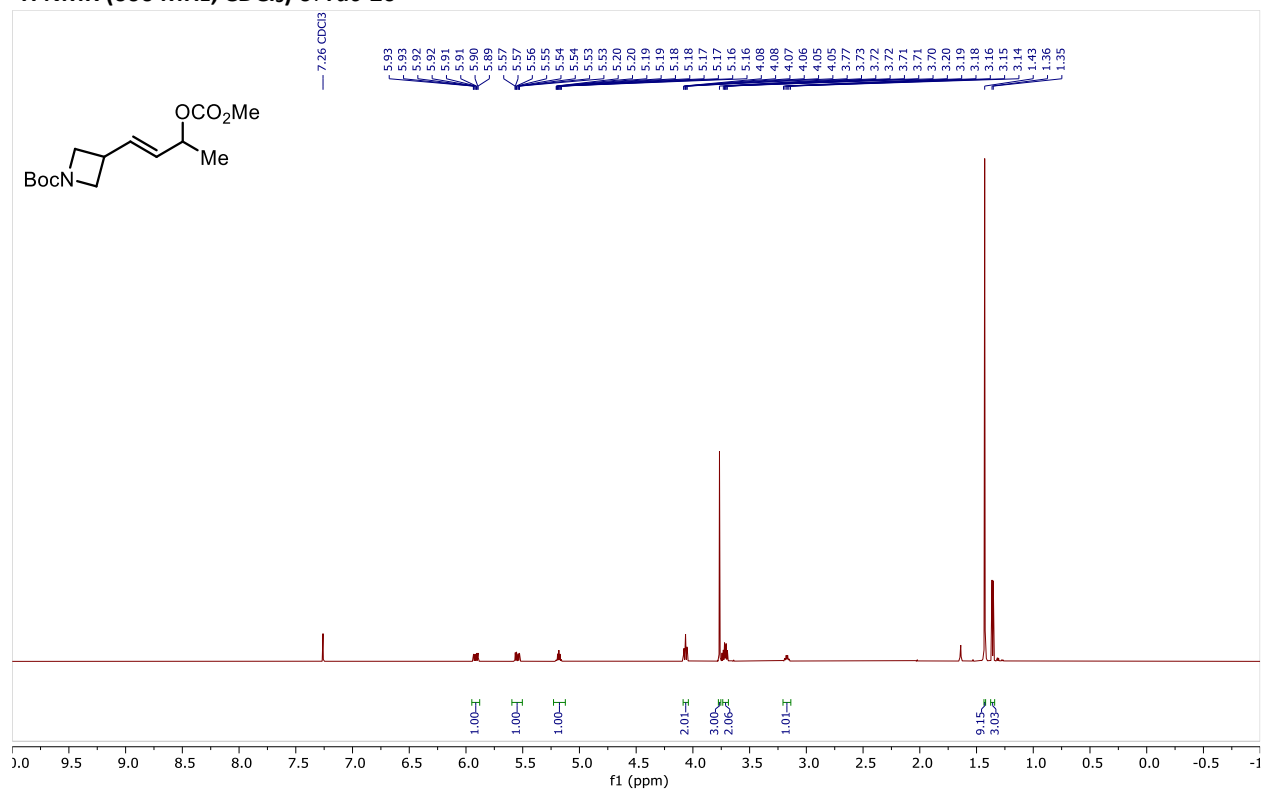

<sup>13</sup>C NMR (101 MHz, CDCl<sub>3</sub>) of *rac*-2c

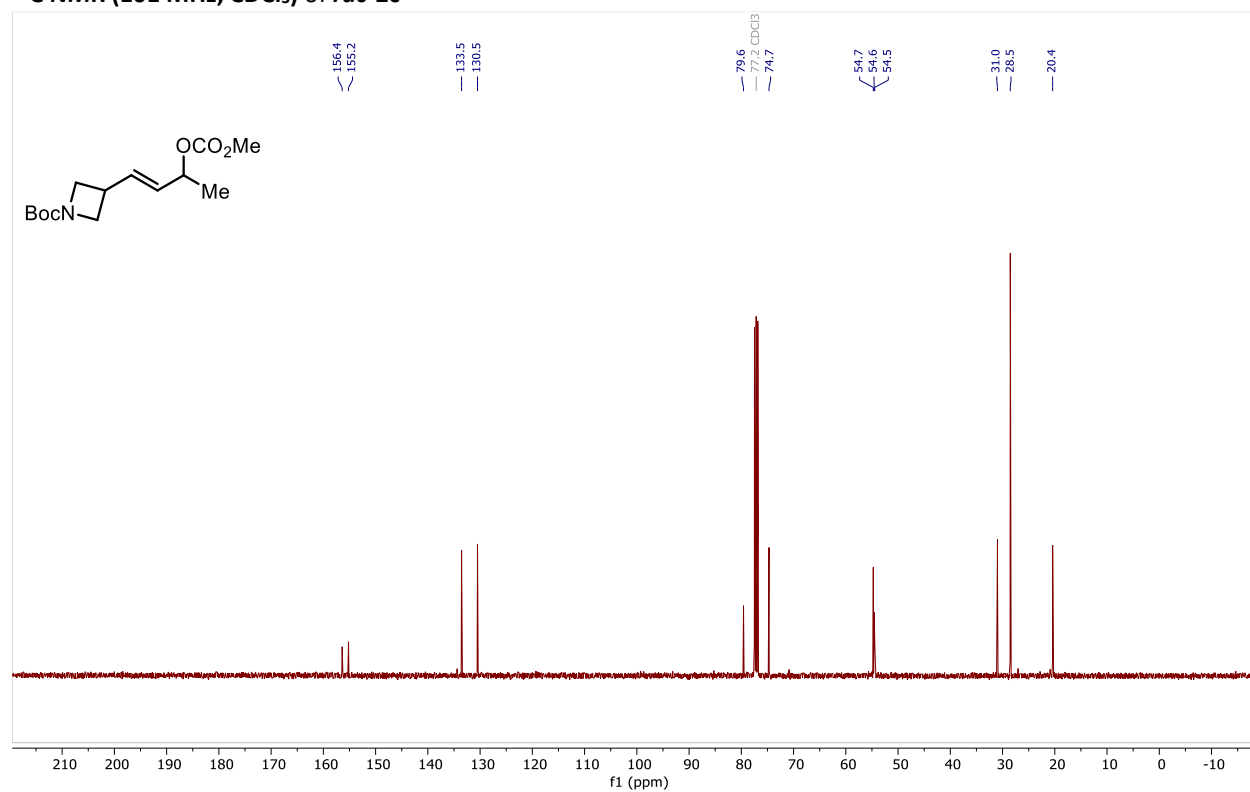

<sup>1</sup>H NMR (400 MHz, CDCl<sub>3</sub>) *rac*-2d

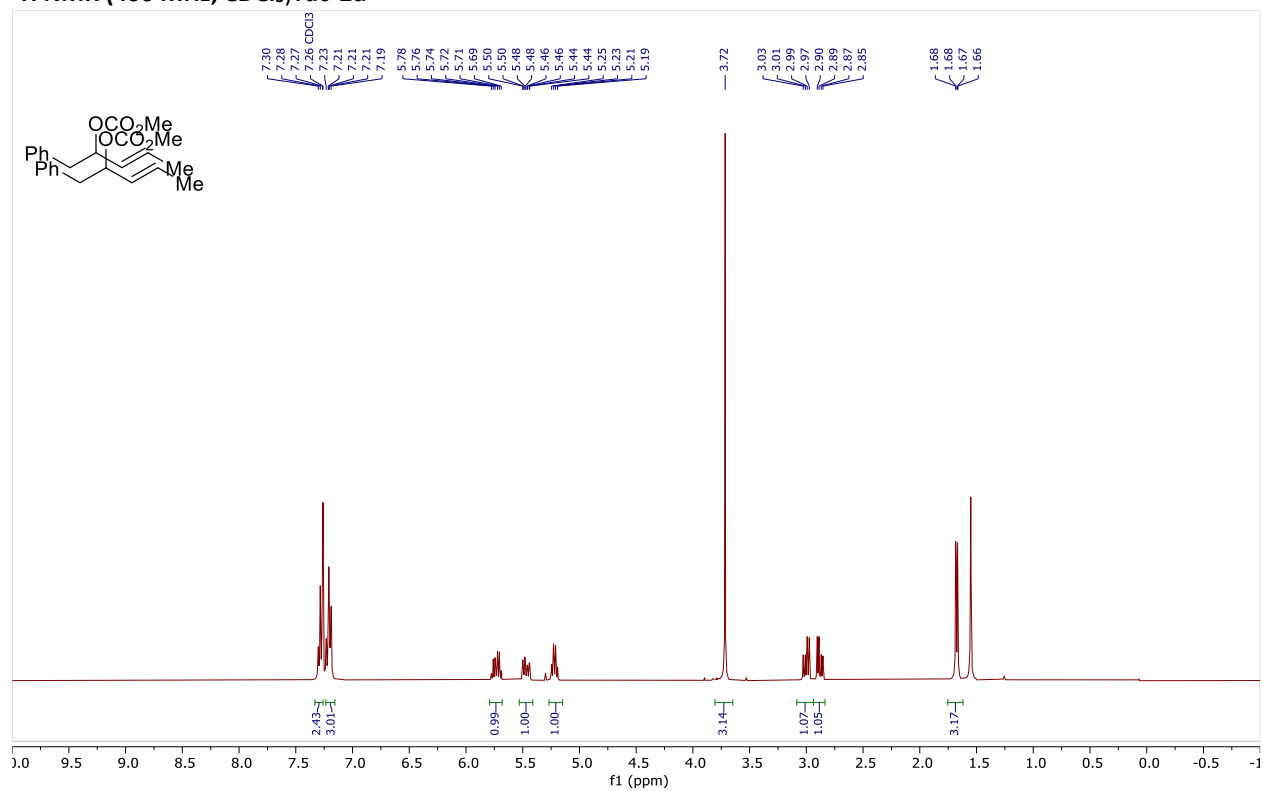

<sup>13</sup>C NMR (101 MHz, CDCl<sub>3</sub>) *rac*-2d

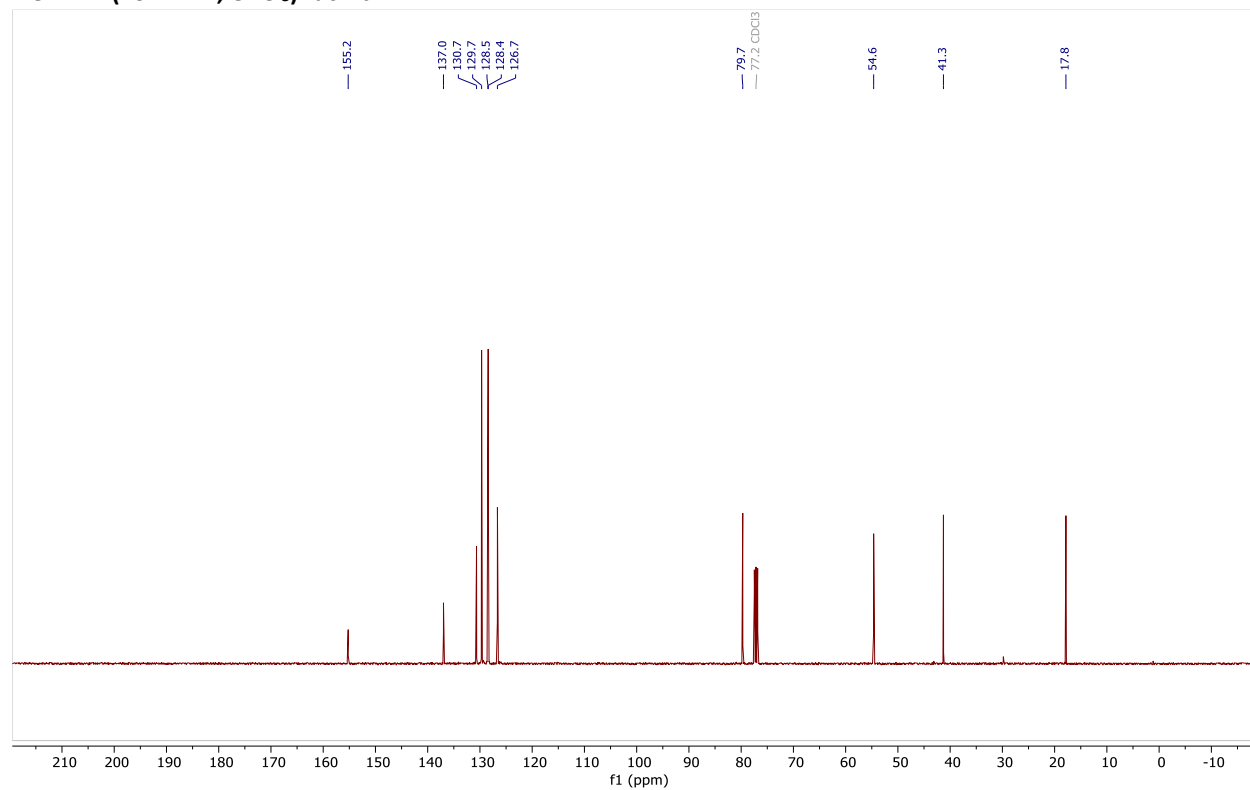

<sup>1</sup>H NMR (600 MHz, CDCl<sub>3</sub>) of *rac-2e*

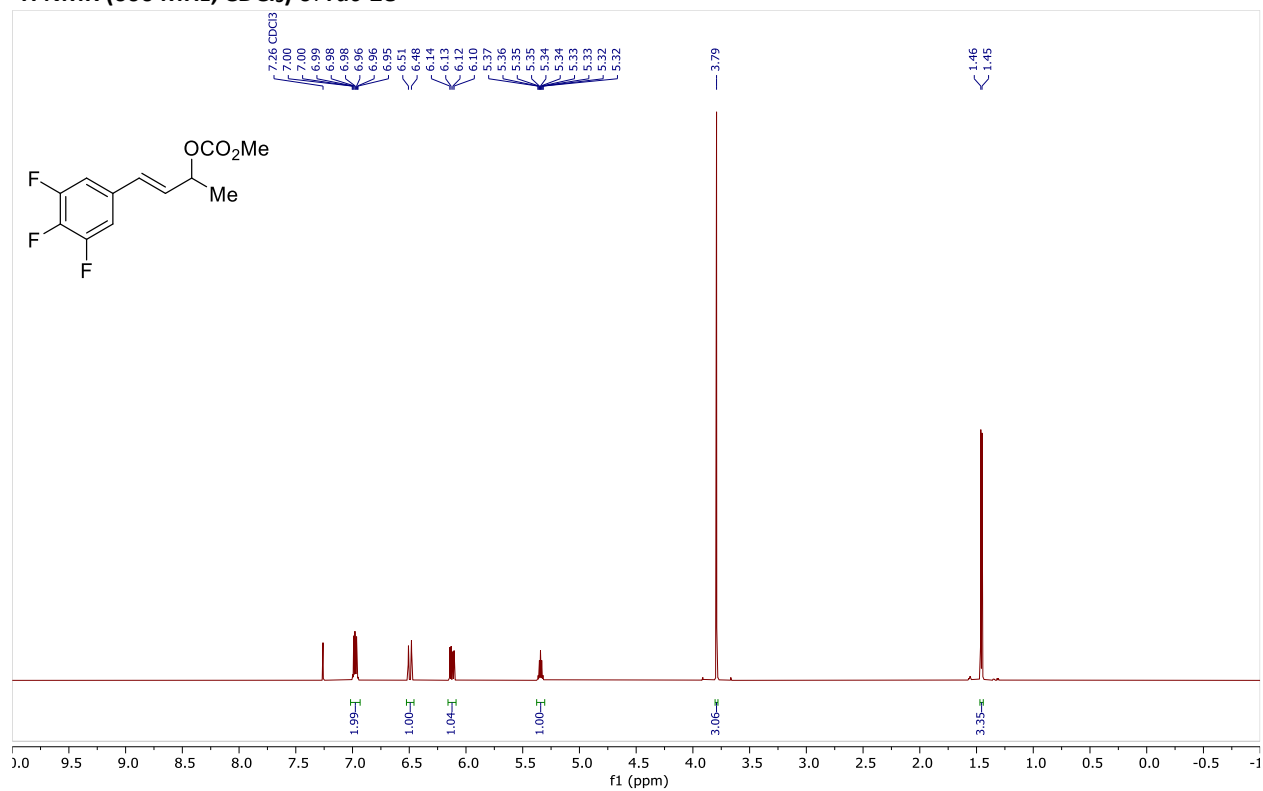

<sup>13</sup>C NMR (101 MHz, CDCl<sub>3</sub>) of *rac-2e*

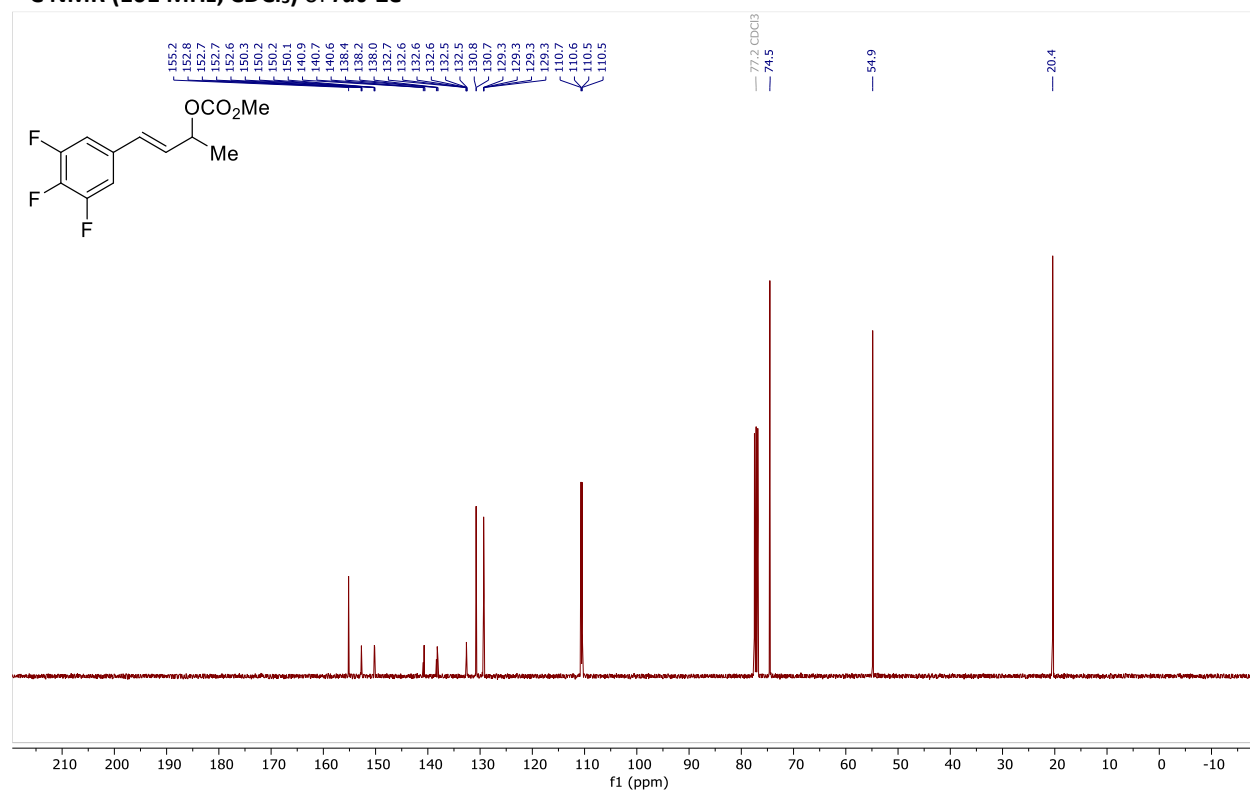



<sup>19</sup>F NMR (377 MHz, CDCl<sub>3</sub>) of *rac-2e*

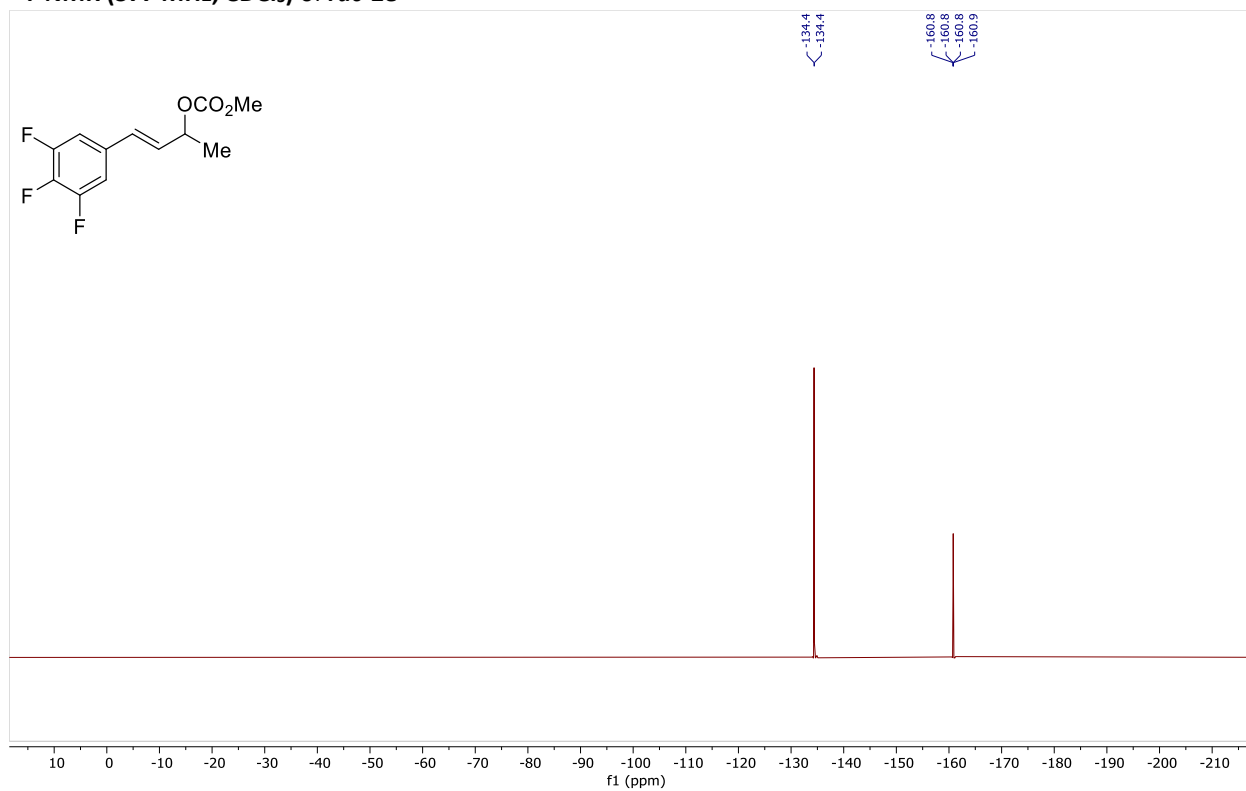

<sup>1</sup>H NMR (400 MHz, CDCl<sub>3</sub>) of *rac-2f*

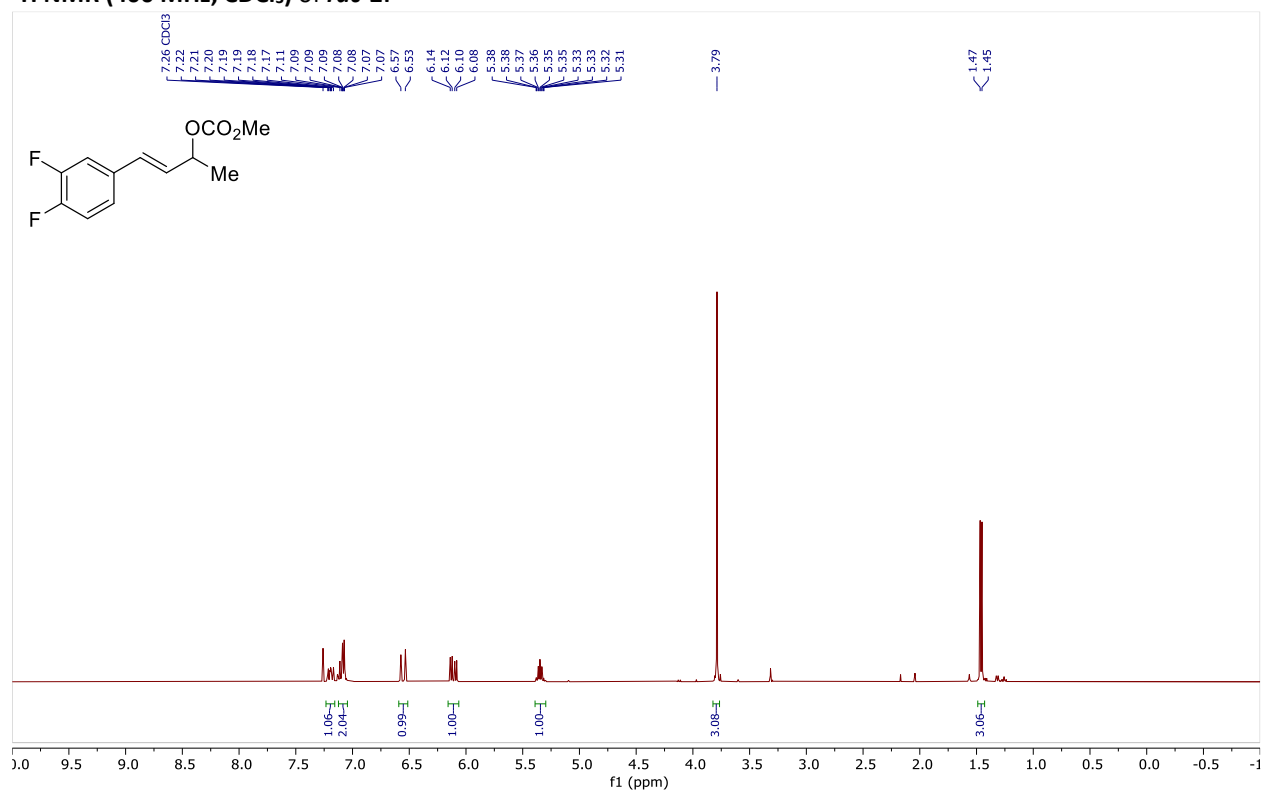

<sup>13</sup>C NMR (101 MHz, CDCl<sub>3</sub>) of *rac*-2f

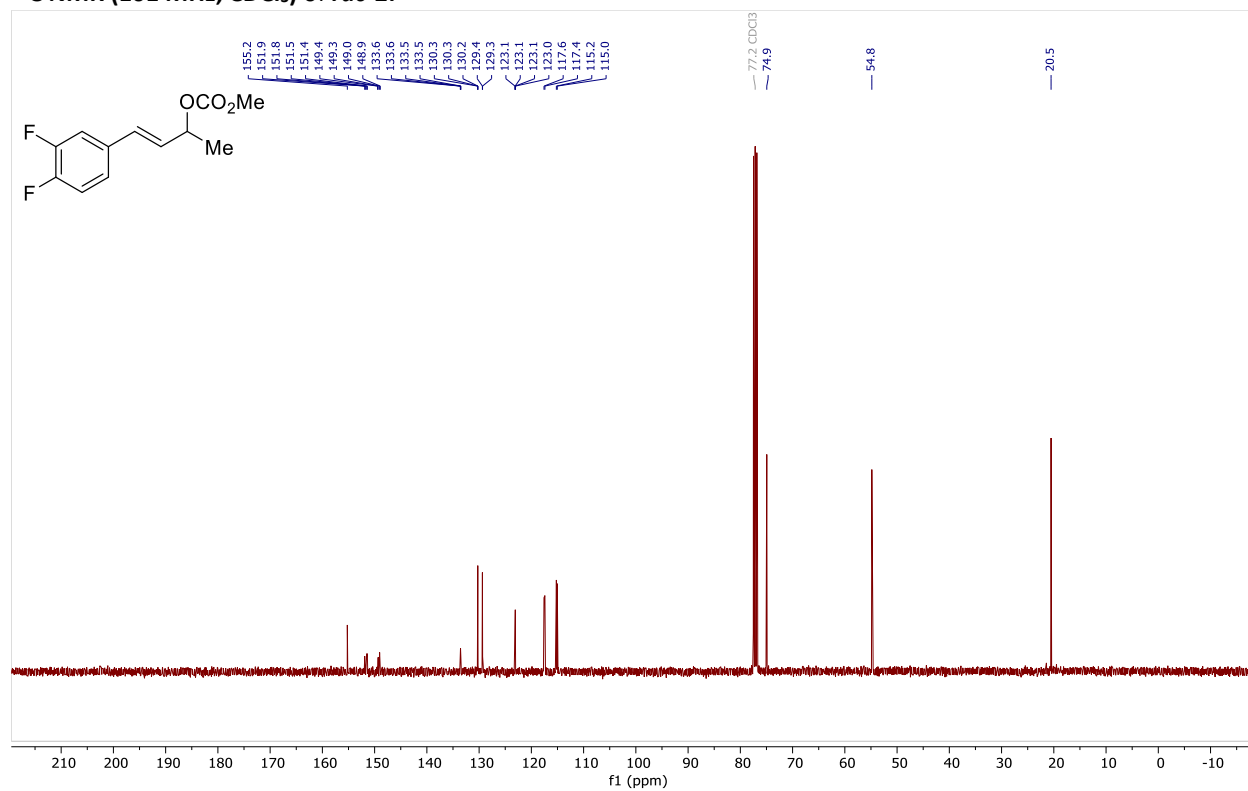

<sup>19</sup>F NMR (565 MHz, CDCl<sub>3</sub>) of *rac*-2f

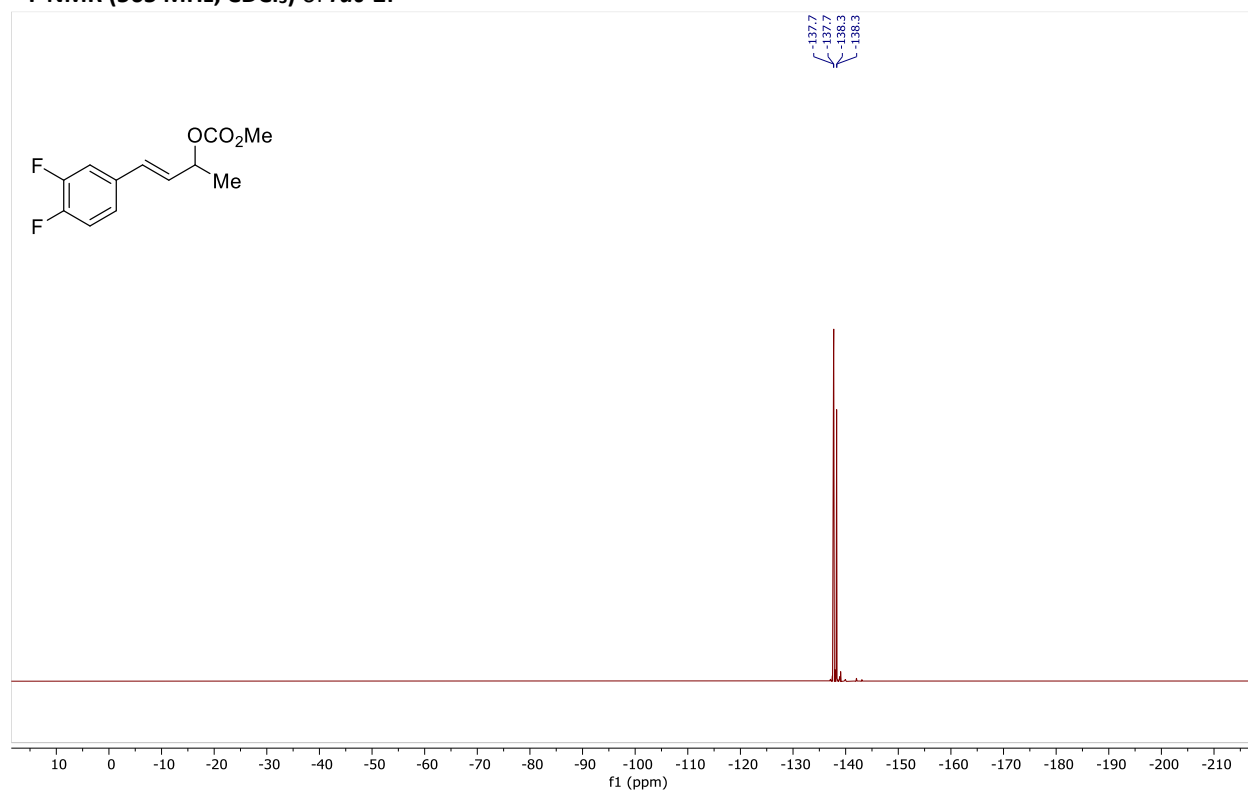

<sup>1</sup>H NMR (400 MHz, CDCl<sub>3</sub>) of *rac-2g*

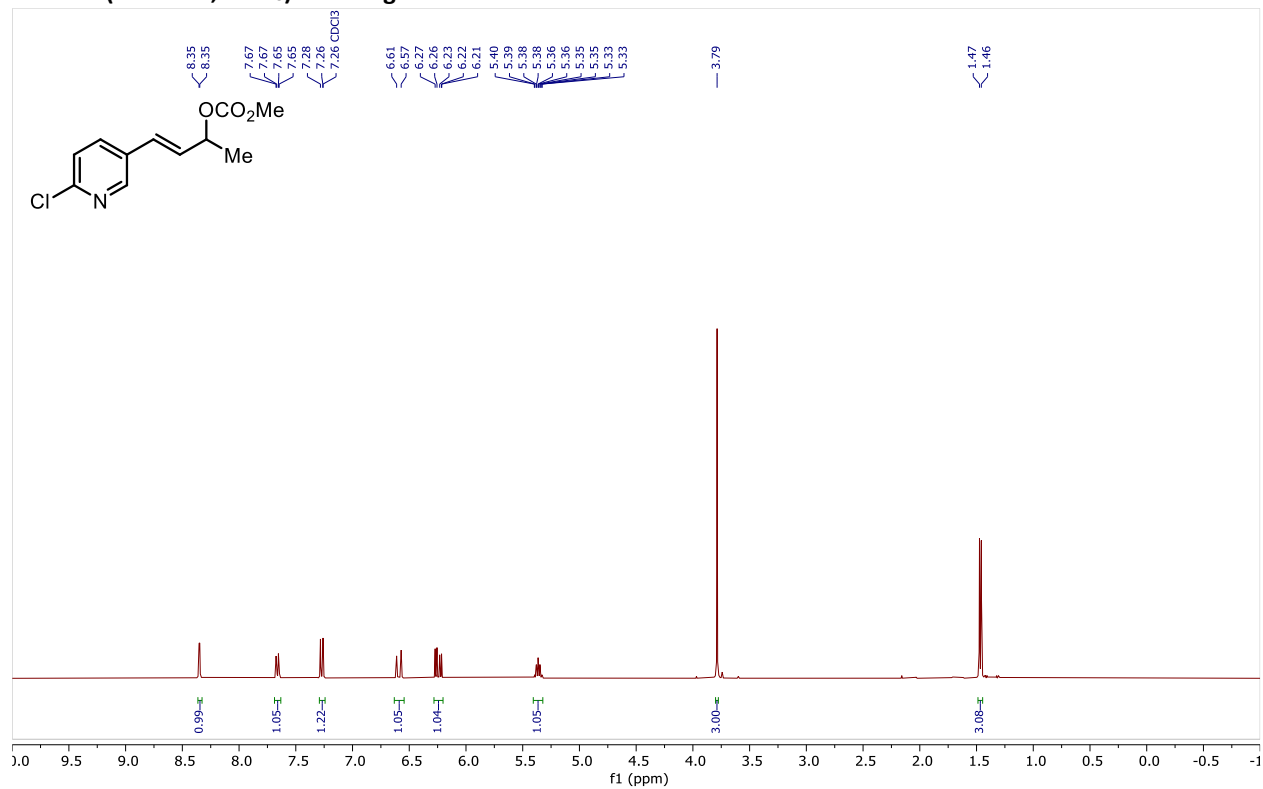

<sup>13</sup>C NMR (101 MHz, CDCl<sub>3</sub>) of *rac-2g*

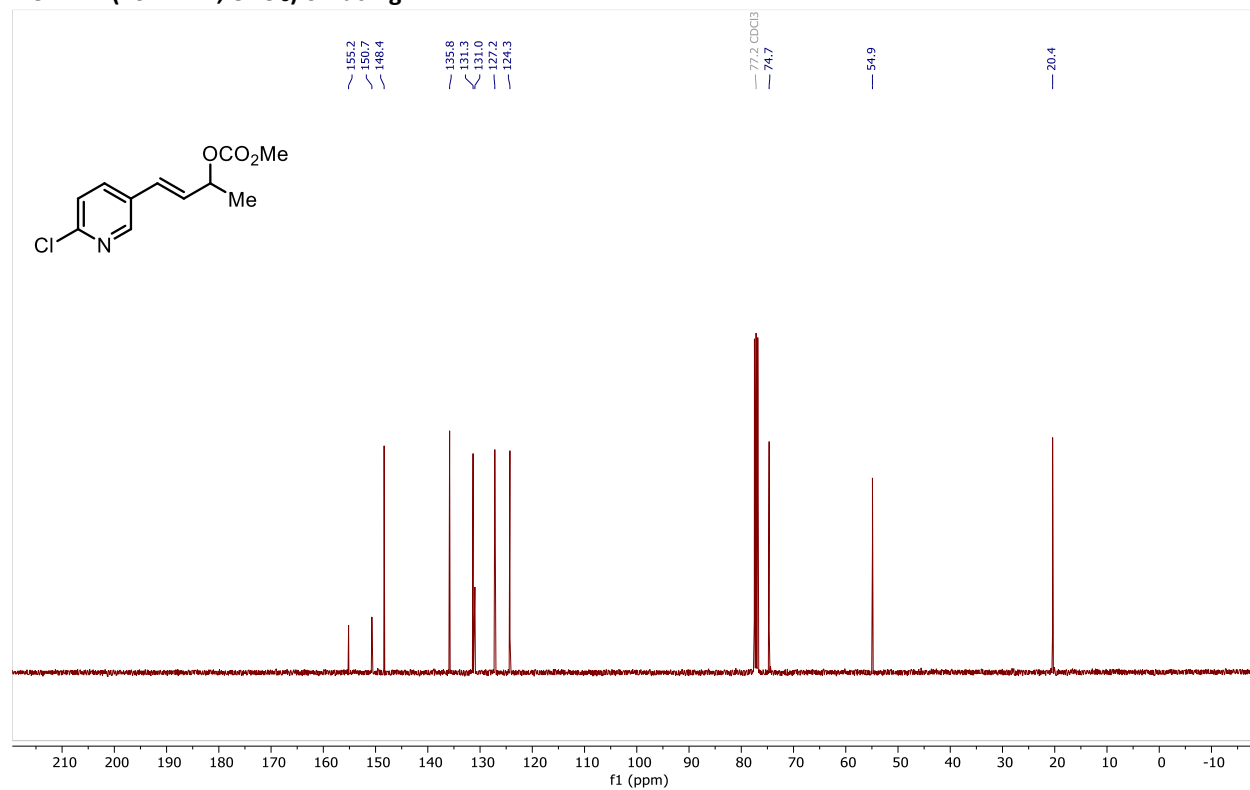

<sup>1</sup>H NMR (400 MHz, CDCl<sub>3</sub>) of *rac*-2h

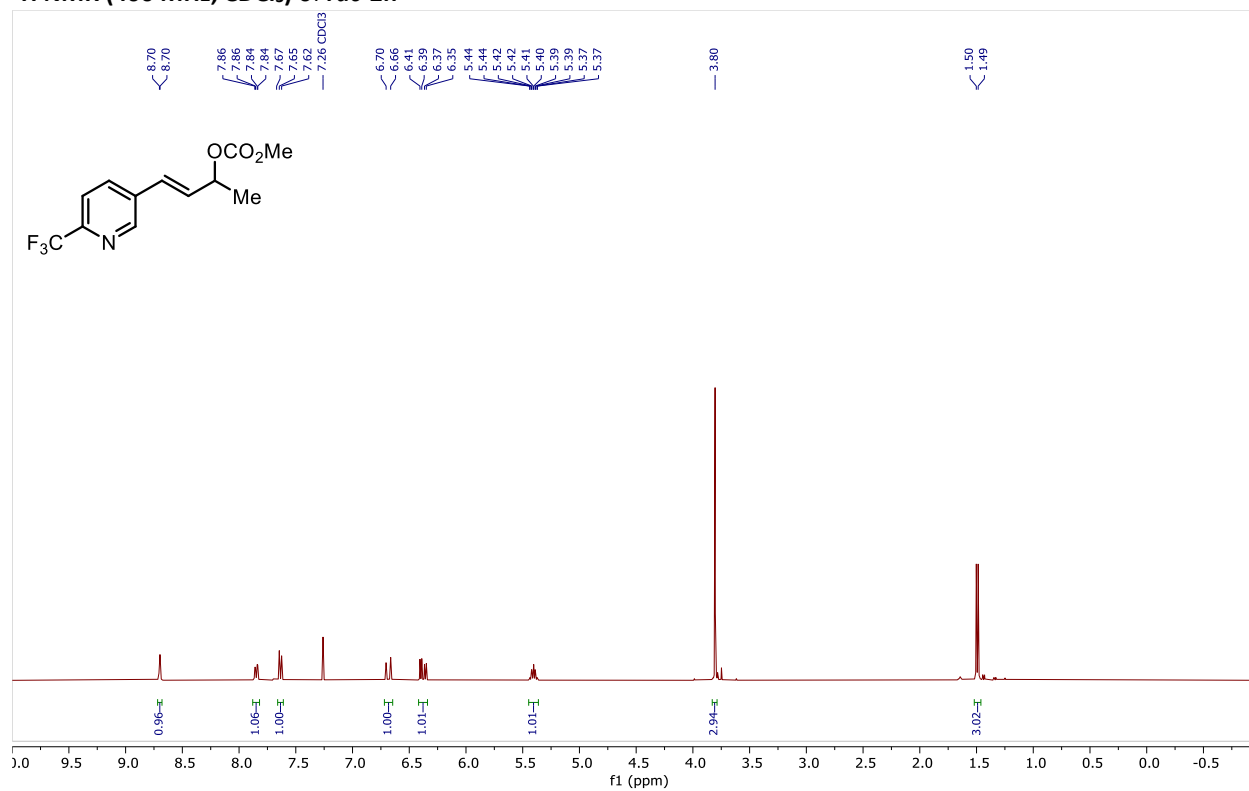

<sup>13</sup>C NMR (101 MHz, CDCl<sub>3</sub>) of *rac*-2h

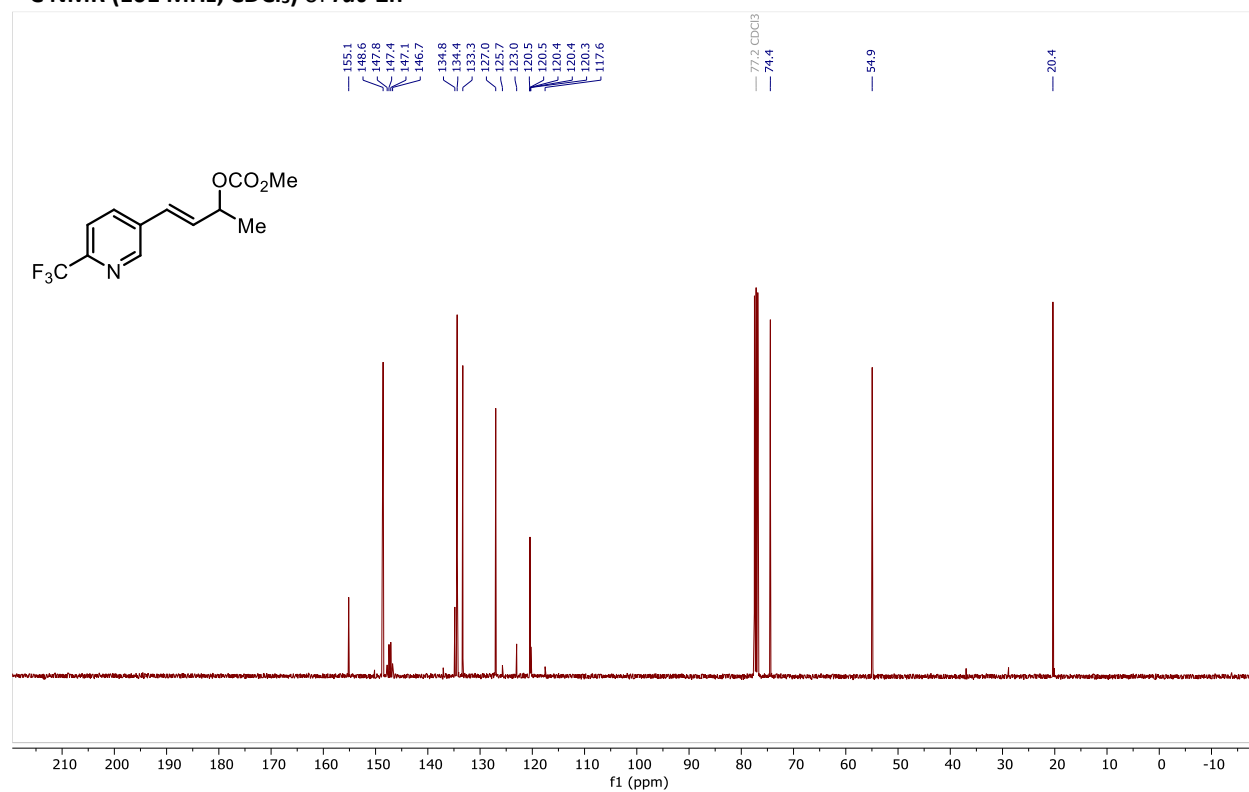

<sup>19</sup>F NMR (377 MHz, CDCl<sub>3</sub>) of *rac-2h*

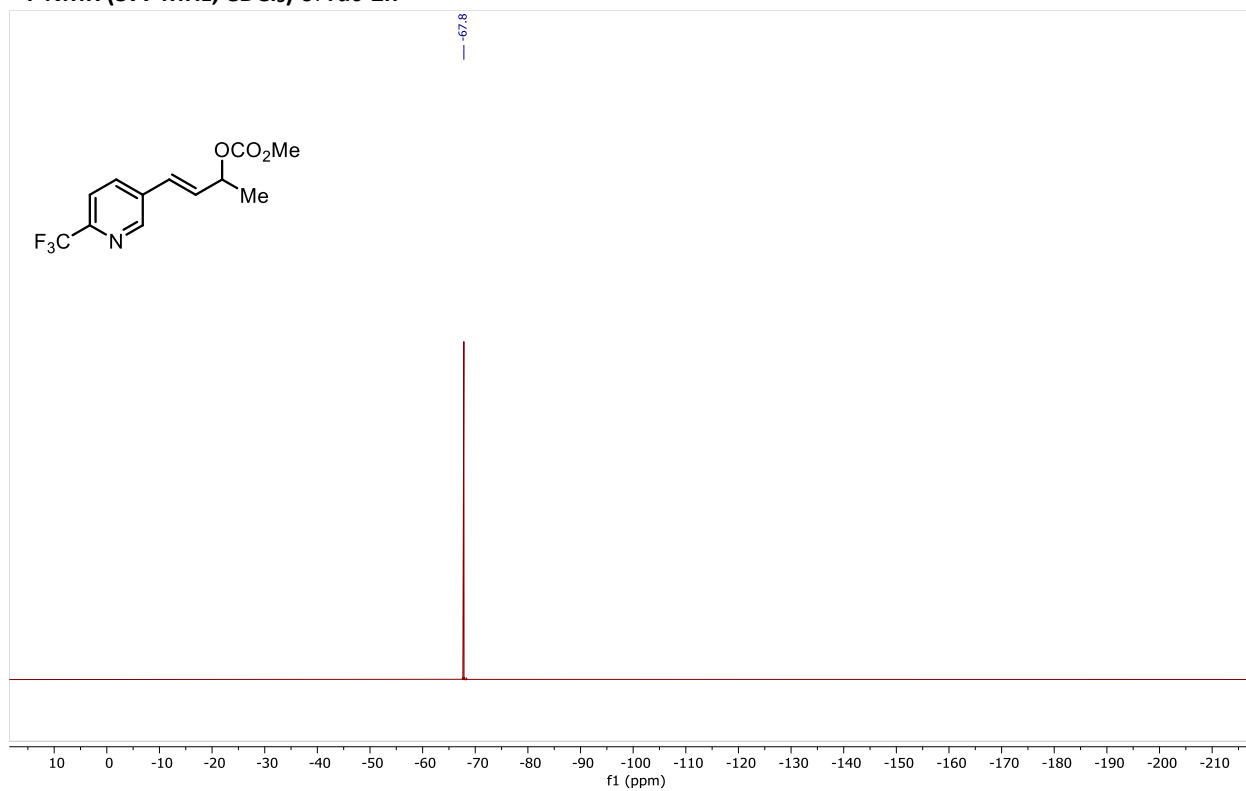

<sup>1</sup>H NMR (600 MHz, CDCl<sub>3</sub>) of *rac-2i*

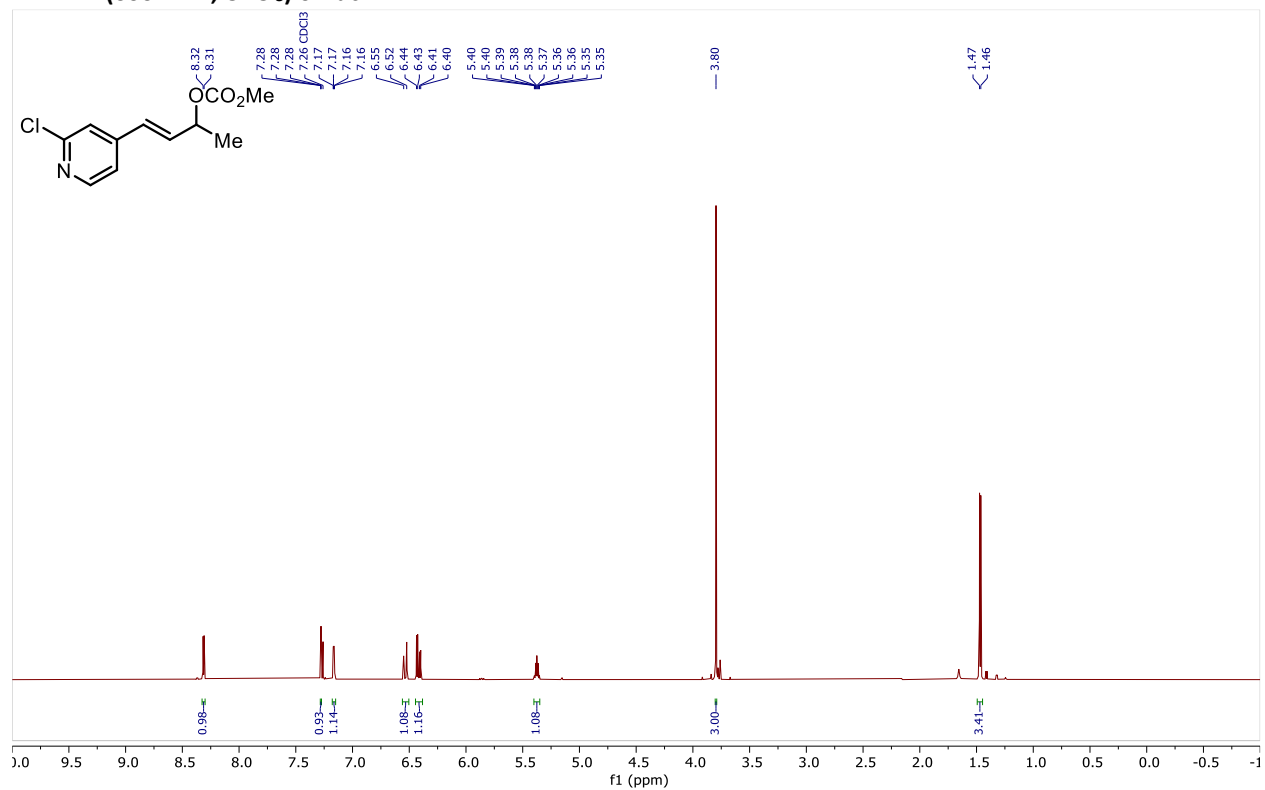

<sup>13</sup>C NMR (101 MHz, CDCl<sub>3</sub>) of *rac*-2i

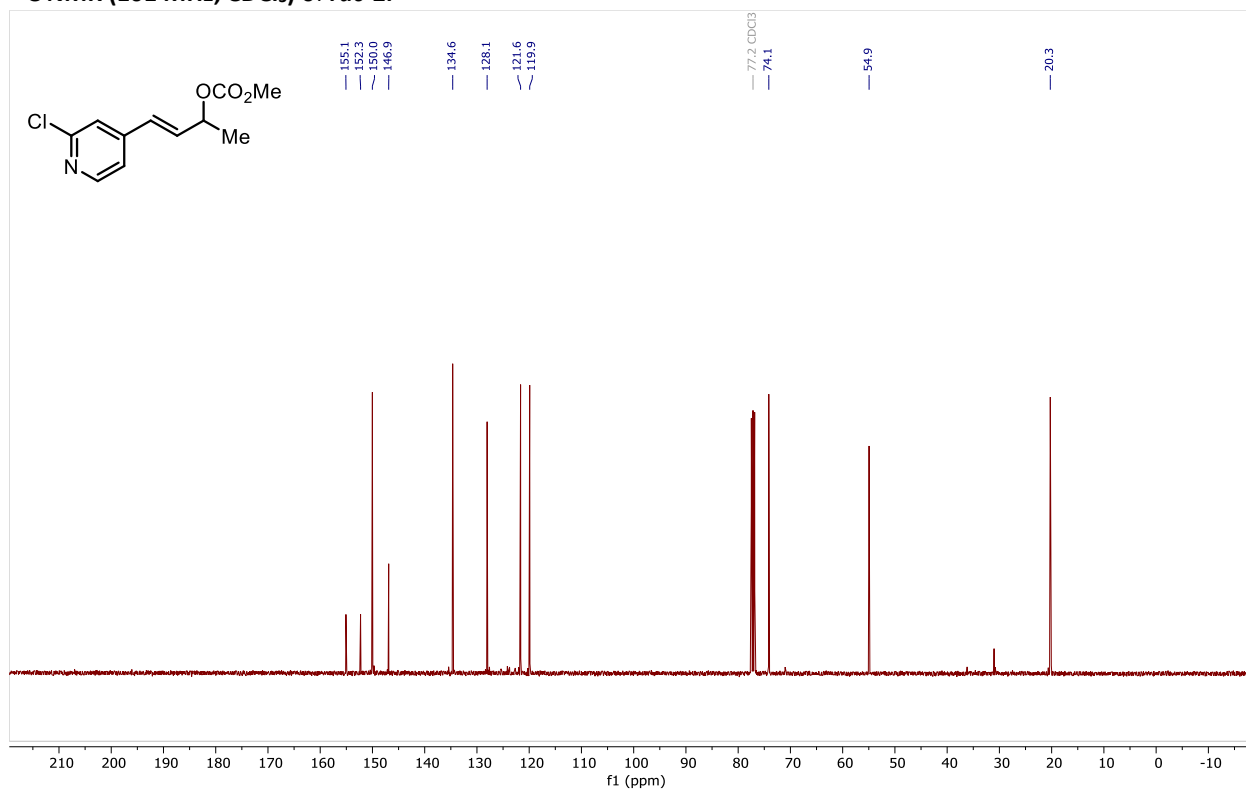

<sup>1</sup>H NMR (400 MHz, CDCl<sub>3</sub>) *rac*-2i-Ac

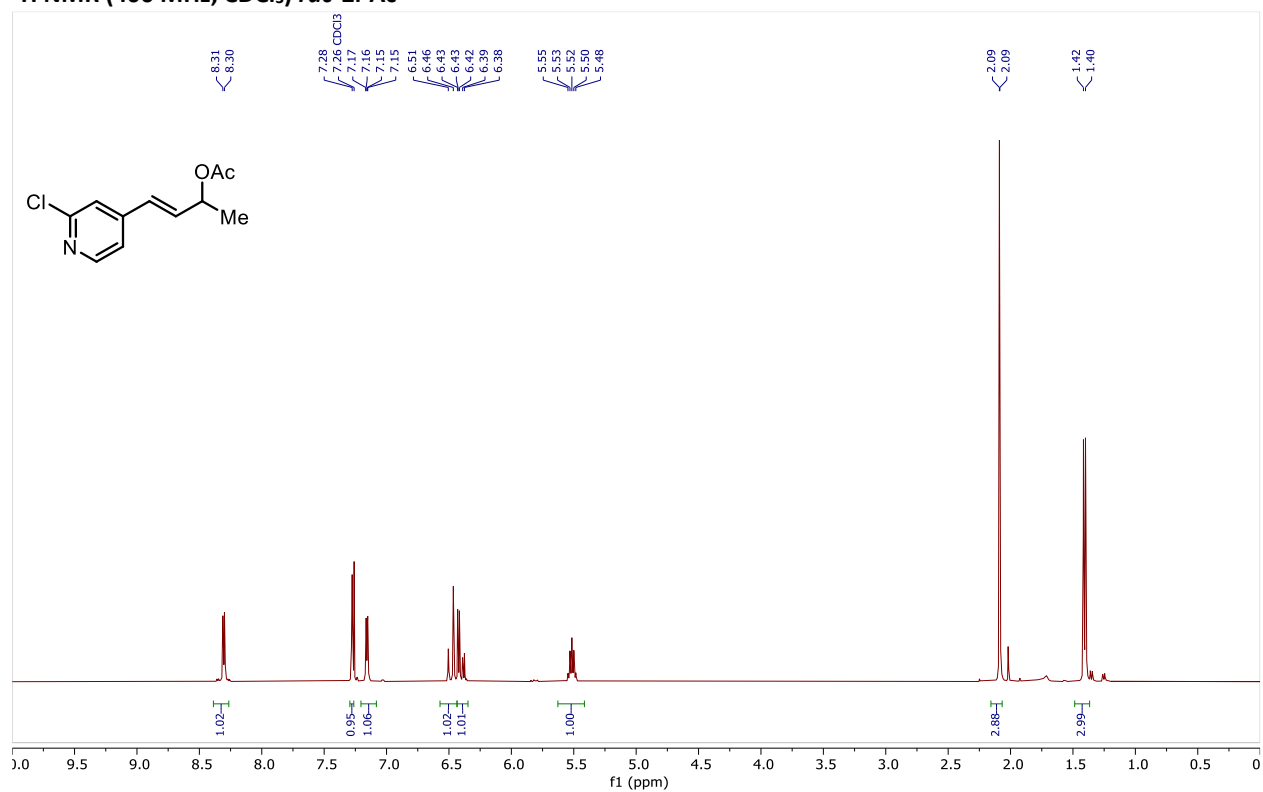

<sup>13</sup>C NMR (101 MHz, CDCl<sub>3</sub>) *rac*-2i-Ac

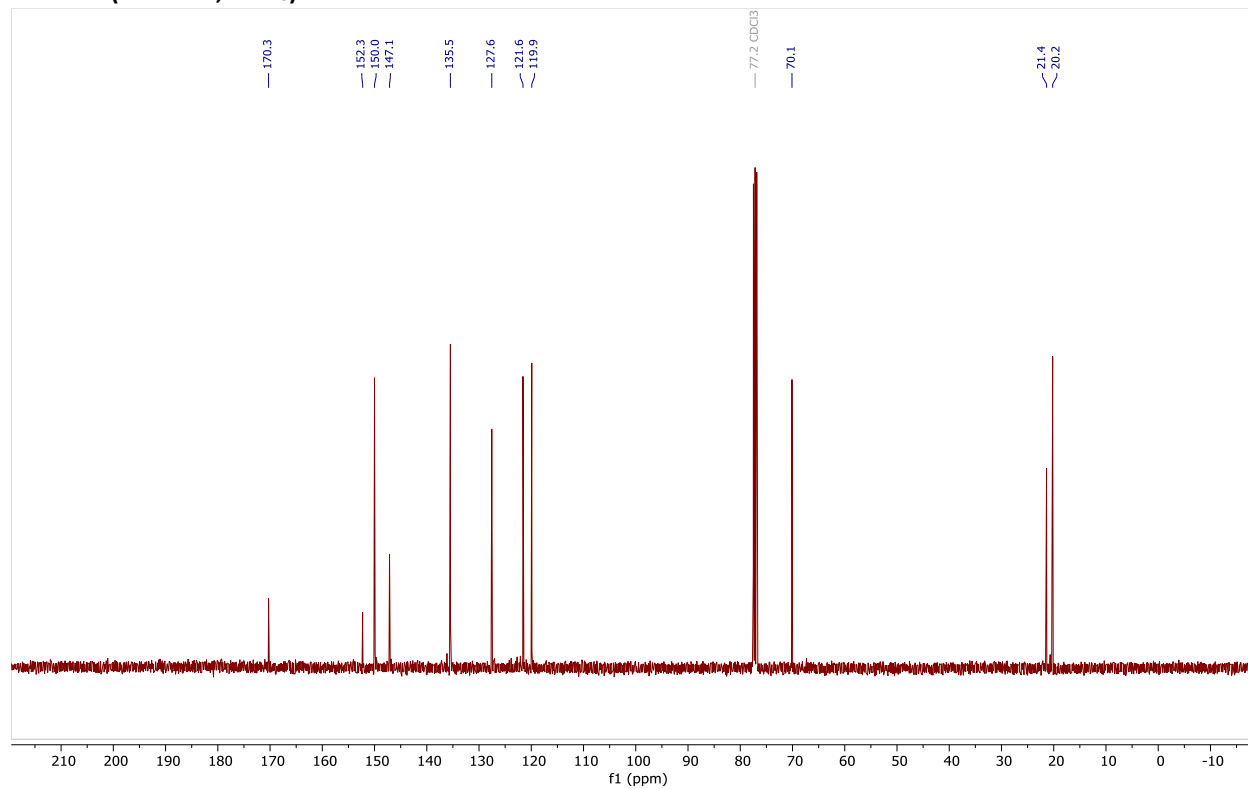

<sup>1</sup>H NMR (400 MHz, CDCl<sub>3</sub>) of *rac*-2j

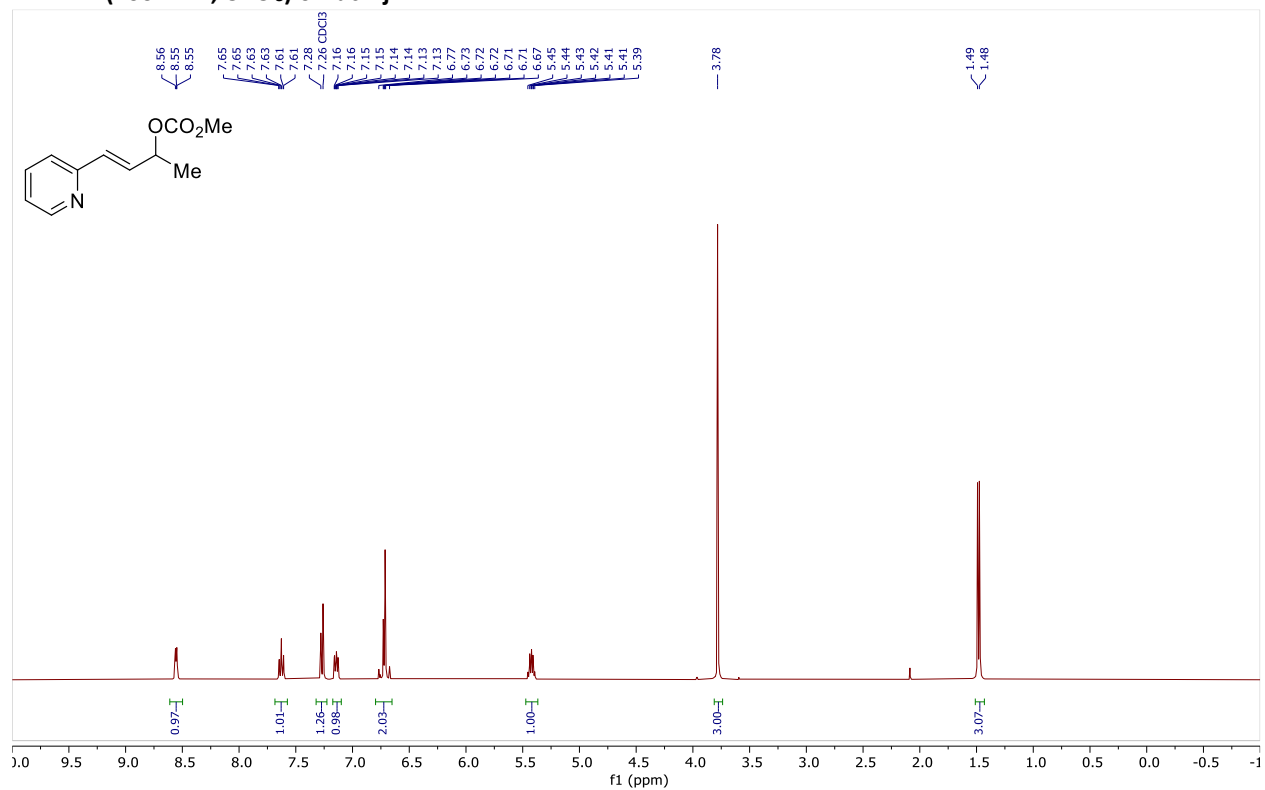

<sup>13</sup>C NMR (101 MHz, CDCl<sub>3</sub>) of *rac-2j*

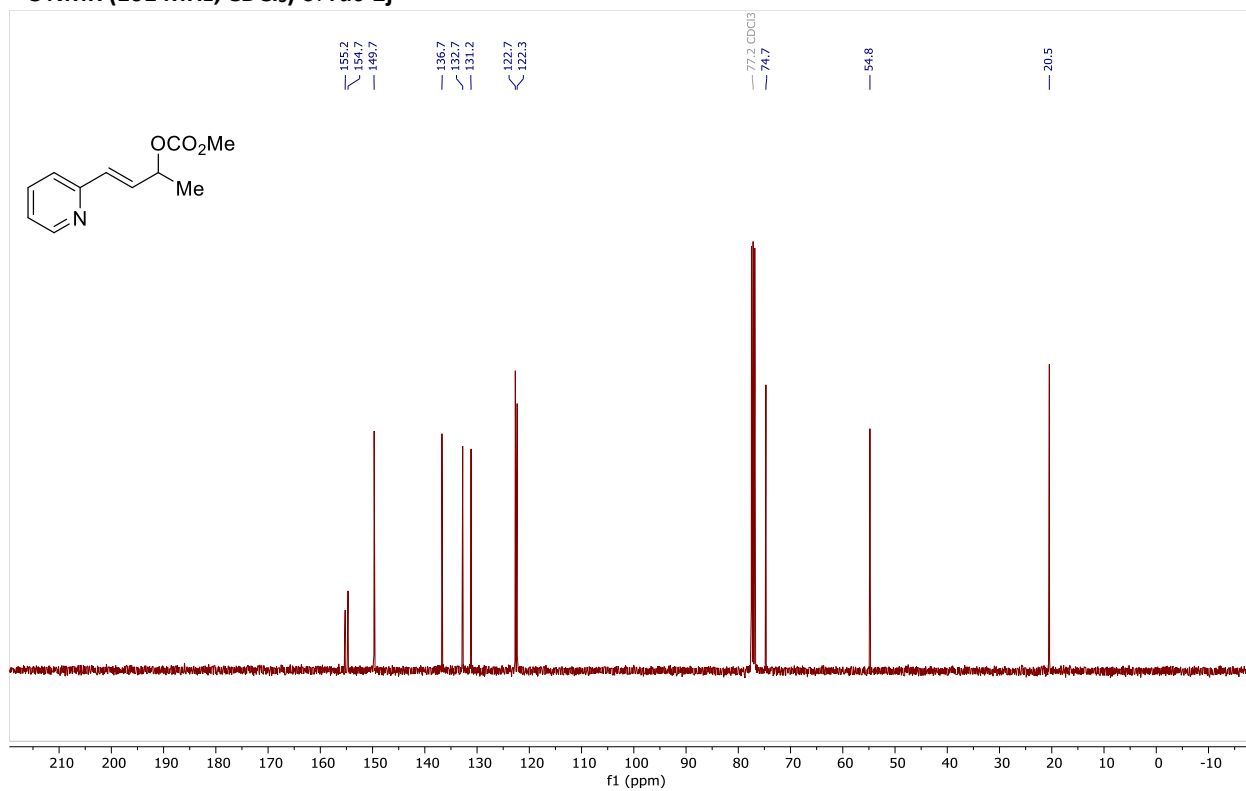

<sup>1</sup>H NMR (400 MHz, CDCl<sub>3</sub>) of *rac-2k-Ac*

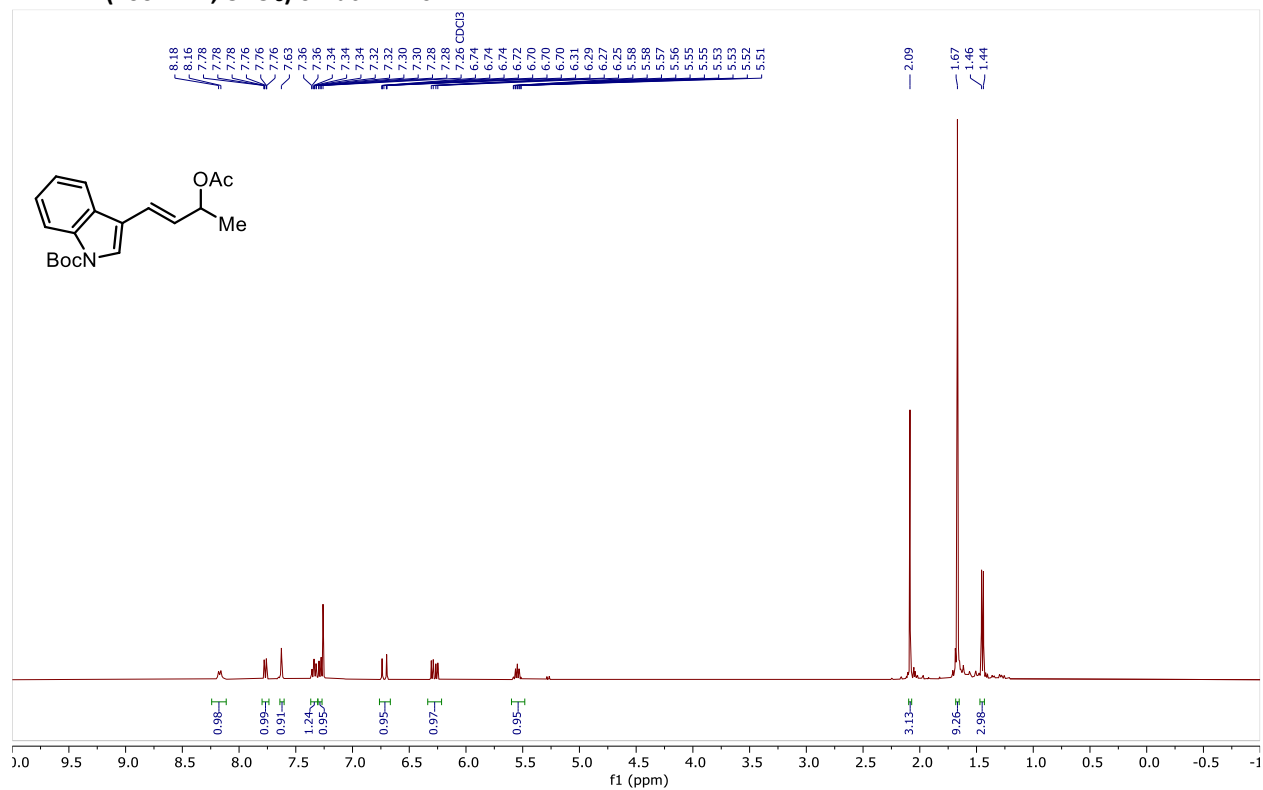



**<sup>13</sup>C NMR (101 MHz, CDCl<sub>3</sub>) of *rac*-2k-Ac**

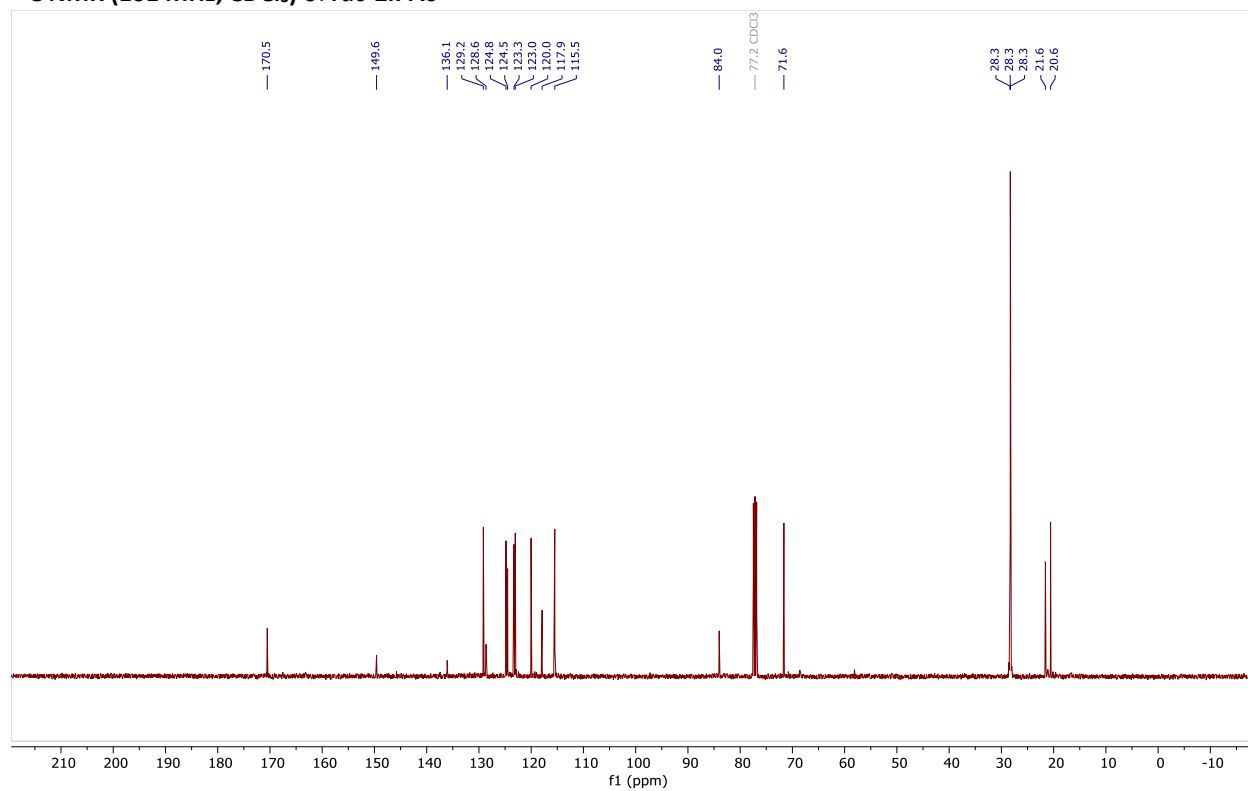

**<sup>1</sup>H NMR (400 MHz, CDCl<sub>3</sub>) of 4a**

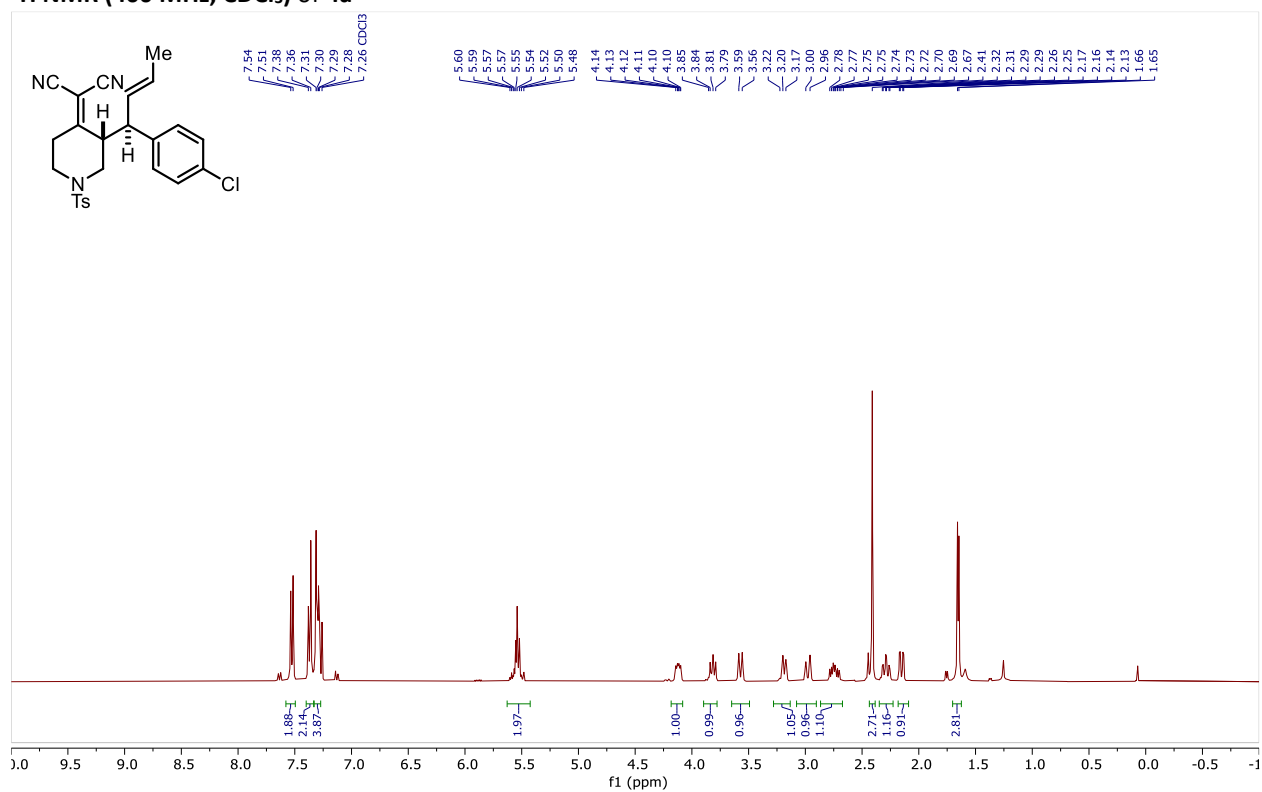

**<sup>13</sup>C NMR (101 MHz, CDCl<sub>3</sub>) of 4a**

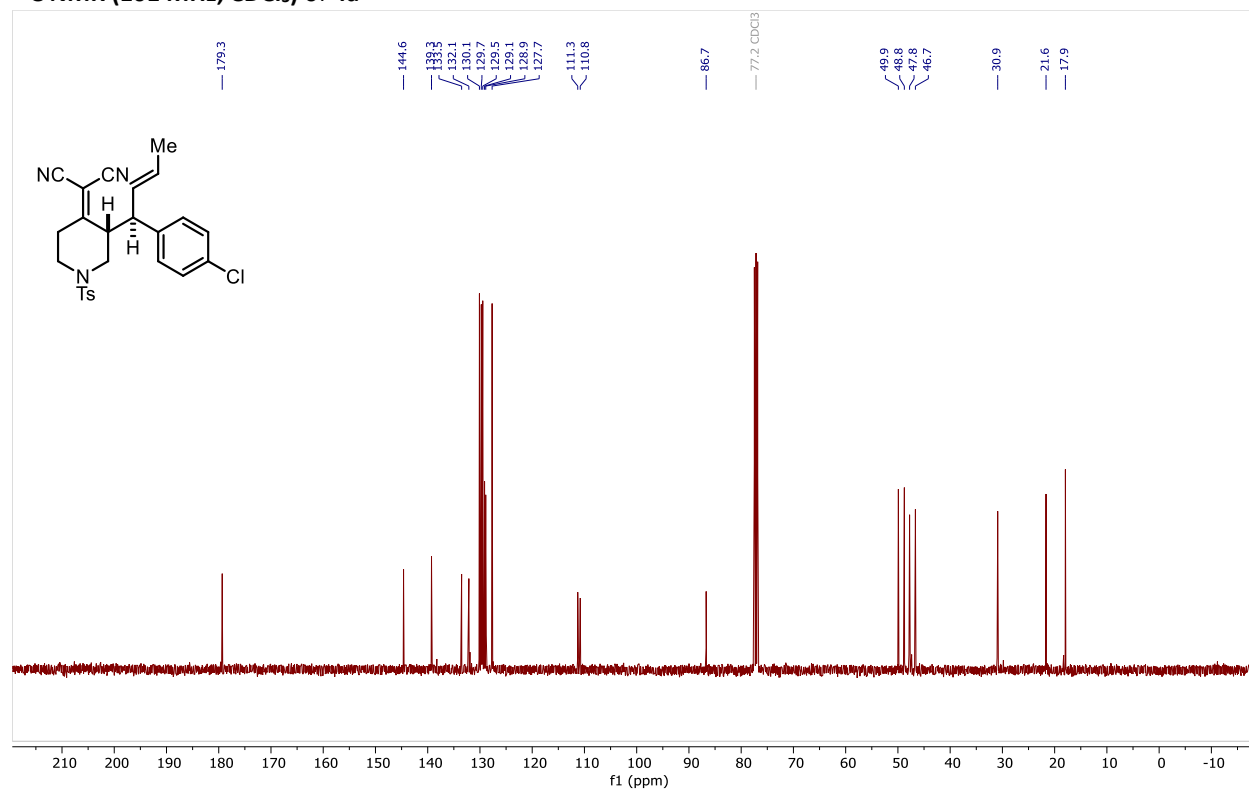

**<sup>1</sup>H NMR (400 MHz, CD<sub>3</sub>CN) of 4b**

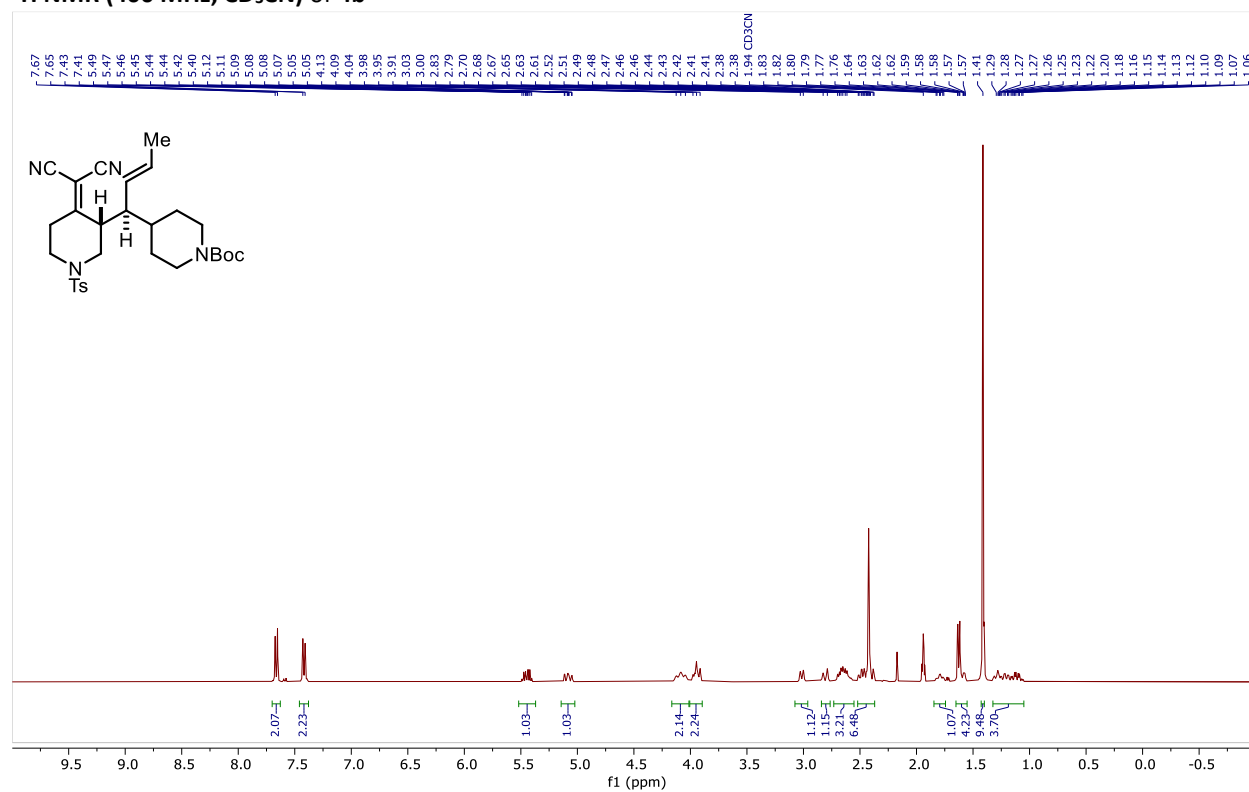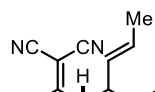

<sup>13</sup>C NMR (101 MHz, CD<sub>3</sub>CN) of 4b

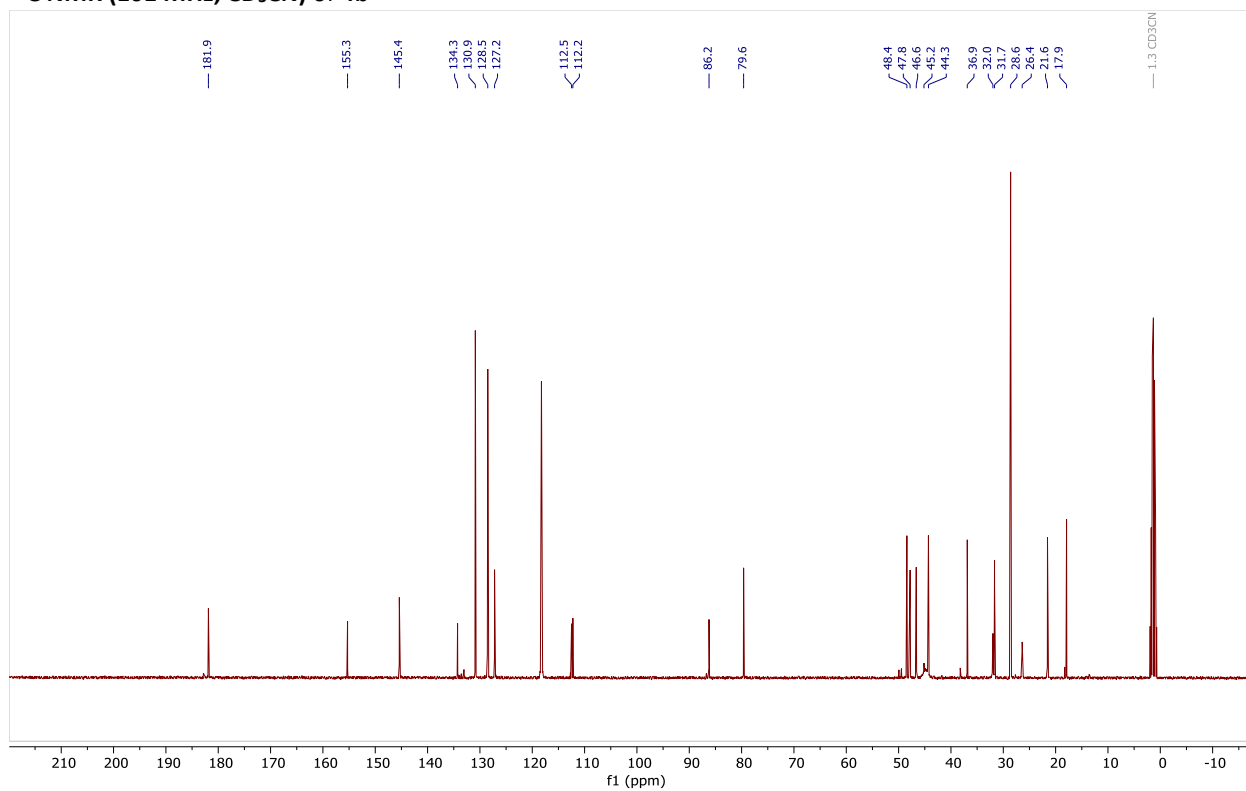

<sup>1</sup>H NMR (400 MHz, CD<sub>3</sub>CN) of 4c

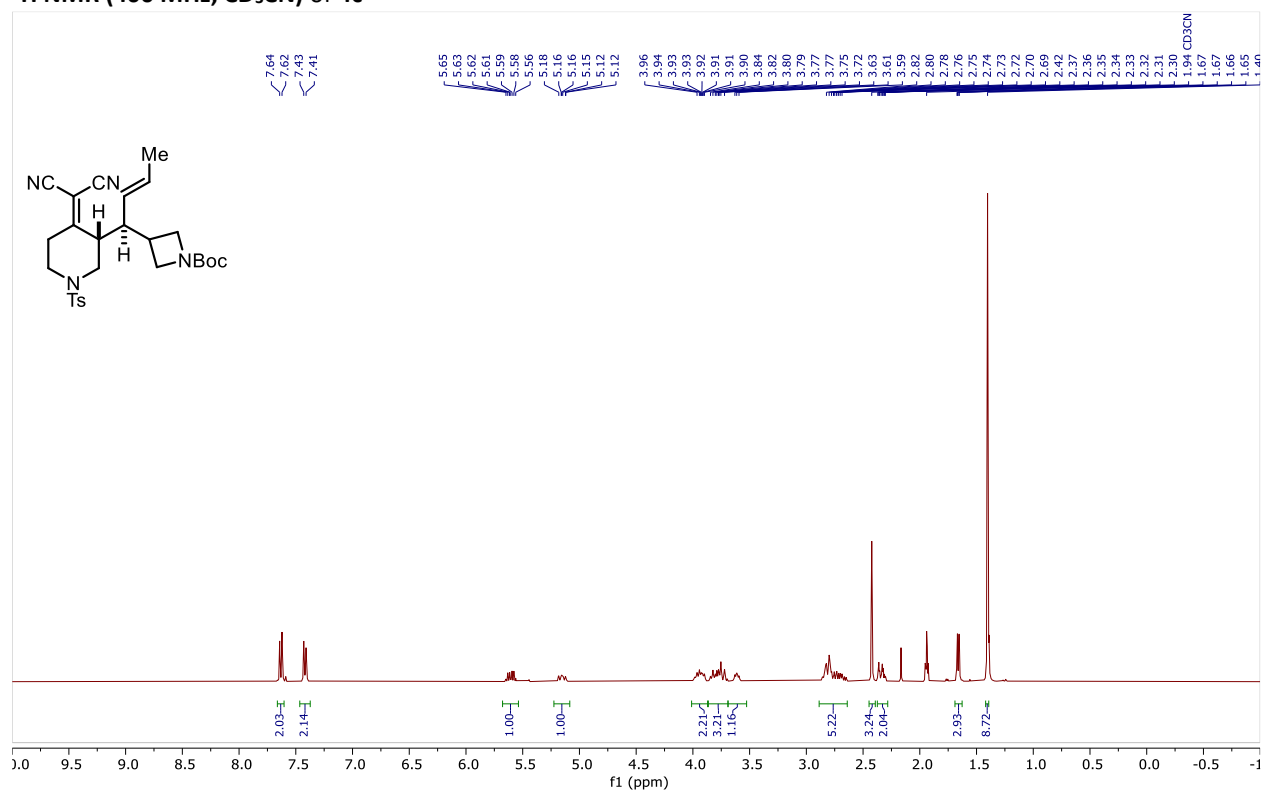

**<sup>13</sup>C NMR (101 MHz, CD<sub>3</sub>CN) of 4c**

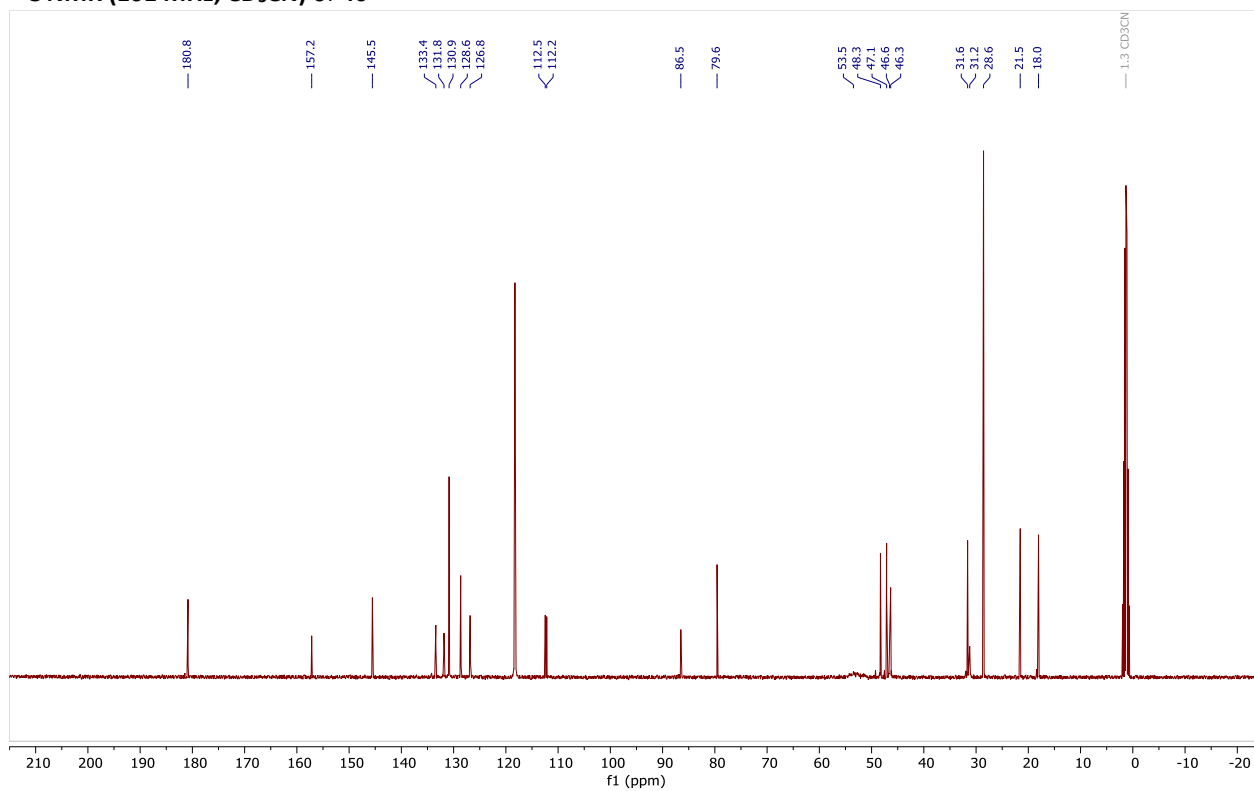

**<sup>1</sup>H NMR (400 MHz, CDCl<sub>3</sub>) of 4d**

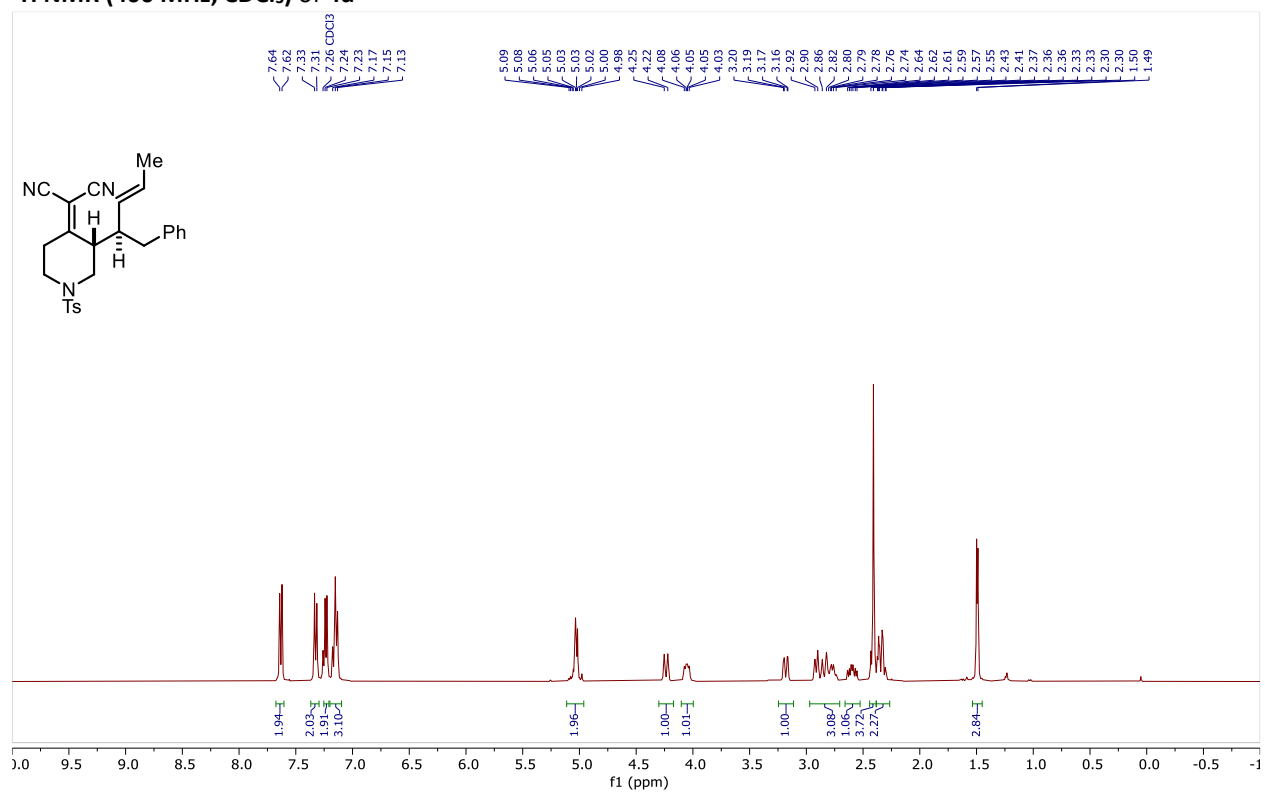

**<sup>13</sup>C NMR (101 MHz, CDCl<sub>3</sub>) of 4d**

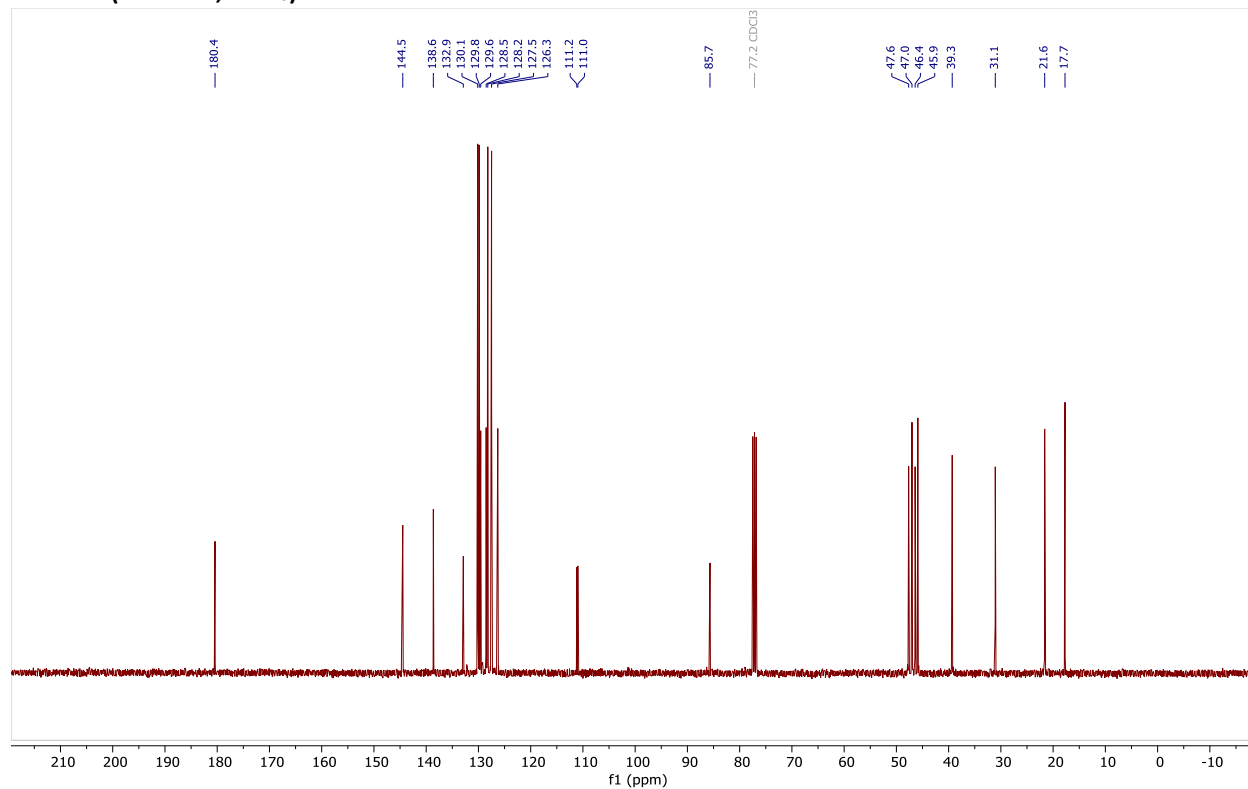

**<sup>1</sup>H NMR (400 MHz, CDCl<sub>3</sub>) of 4e**

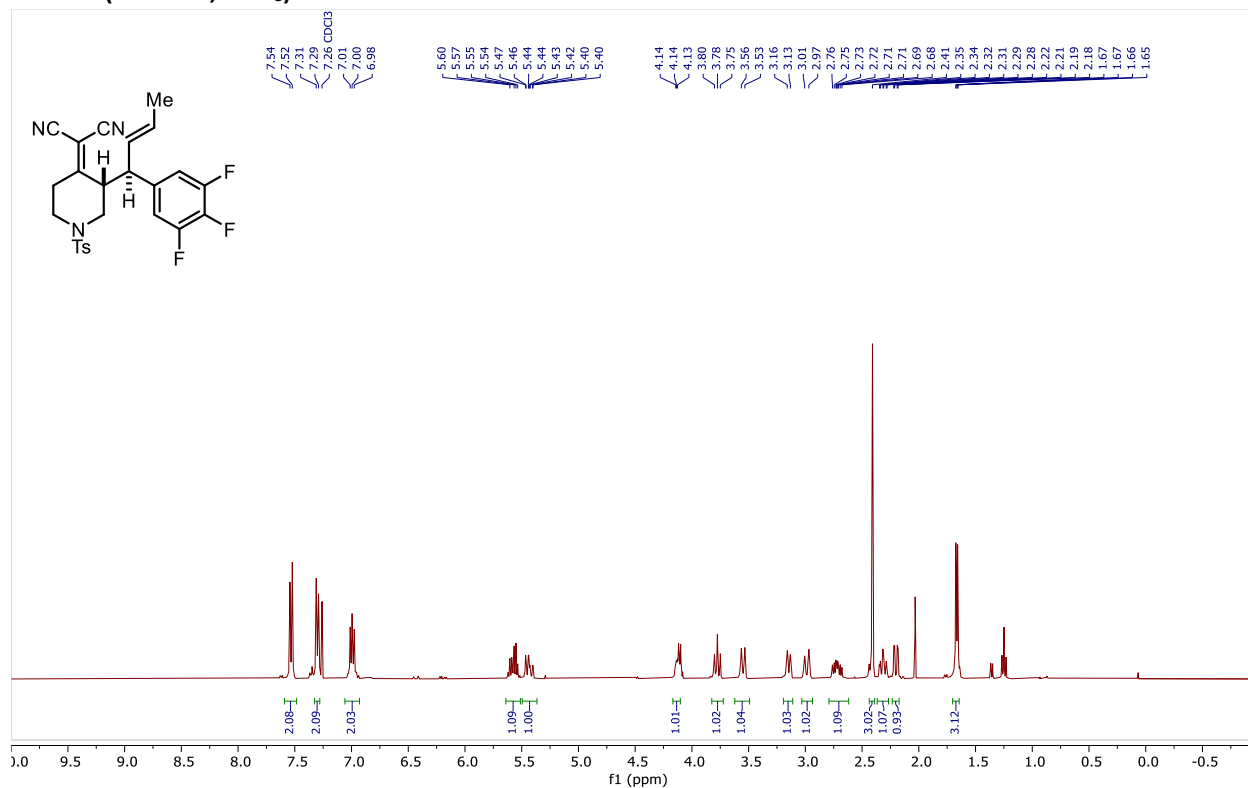

**<sup>13</sup>C NMR (101 MHz, CDCl<sub>3</sub>) of 4e**

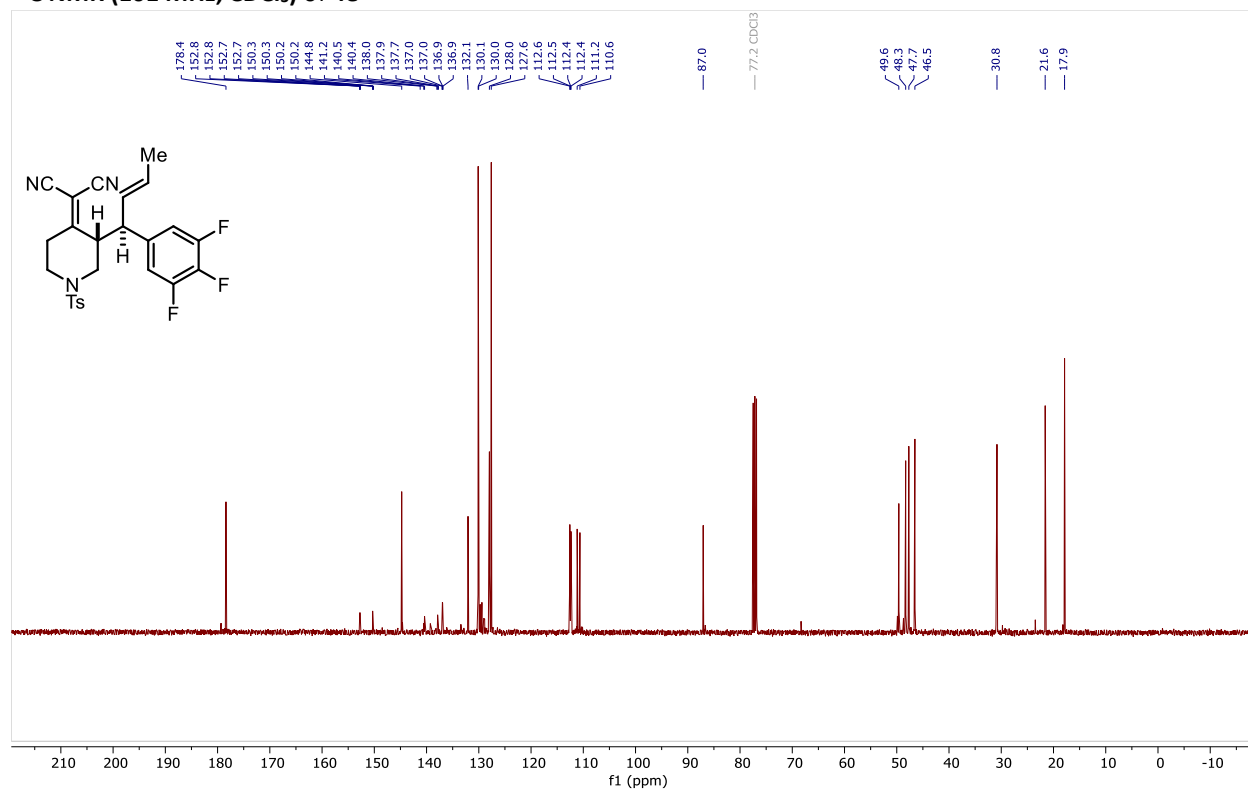

**<sup>19</sup>F NMR (377 MHz, CDCl<sub>3</sub>) of 4e**

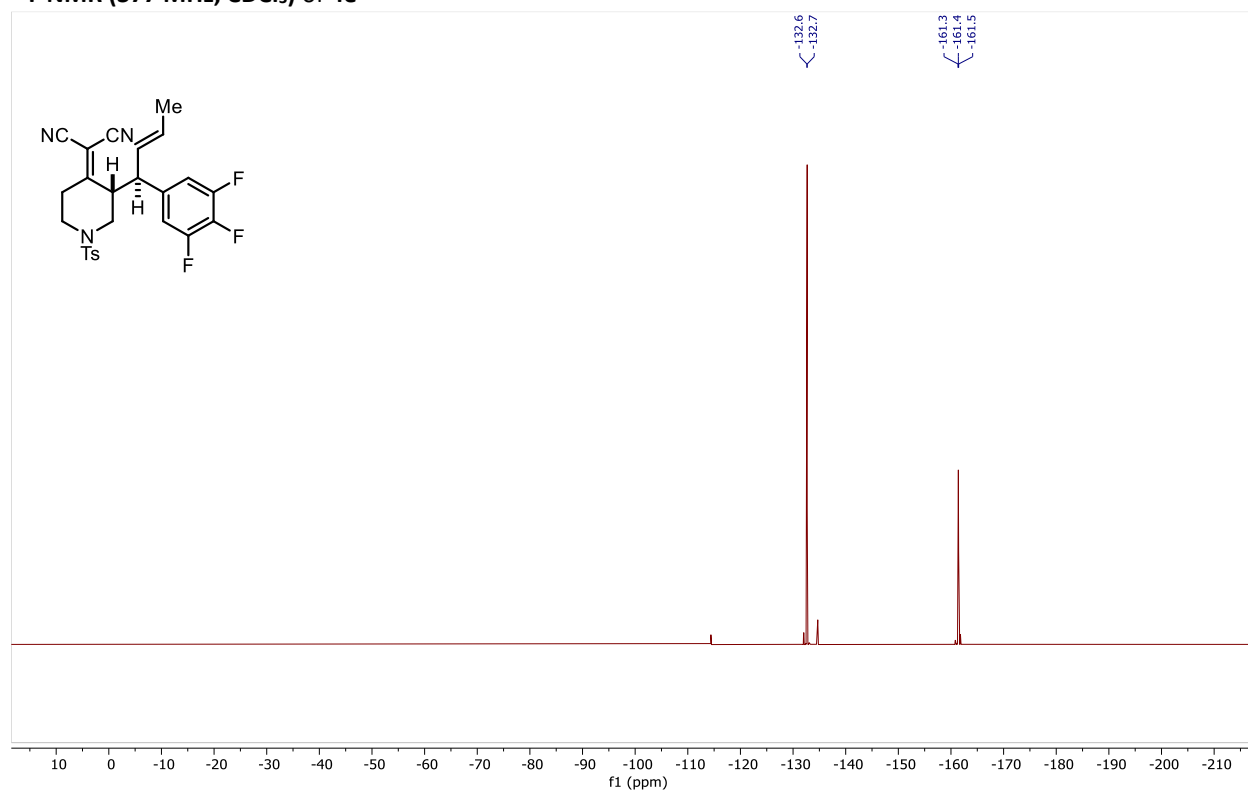

**<sup>1</sup>H NMR (400 MHz, CDCl<sub>3</sub>) of 4f**

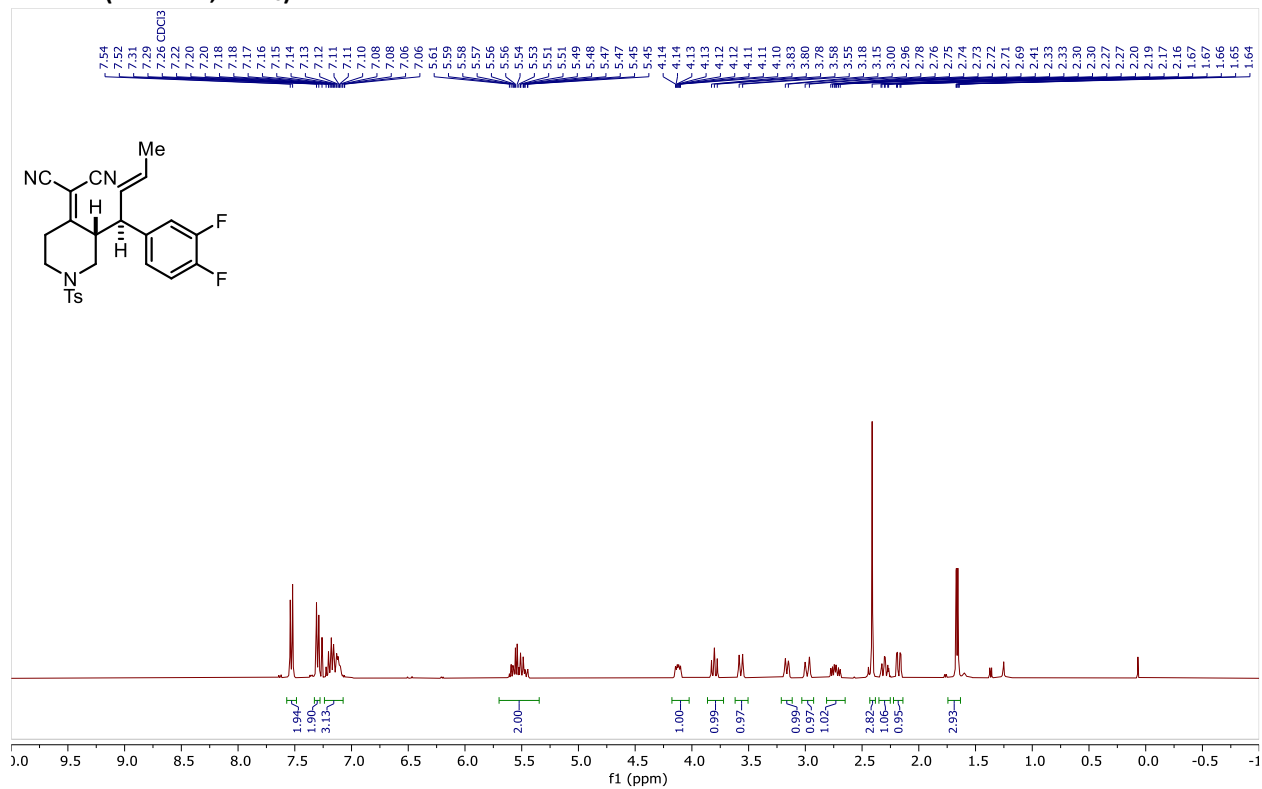

**<sup>13</sup>C NMR (101 MHz, CDCl<sub>3</sub>) of 4f**

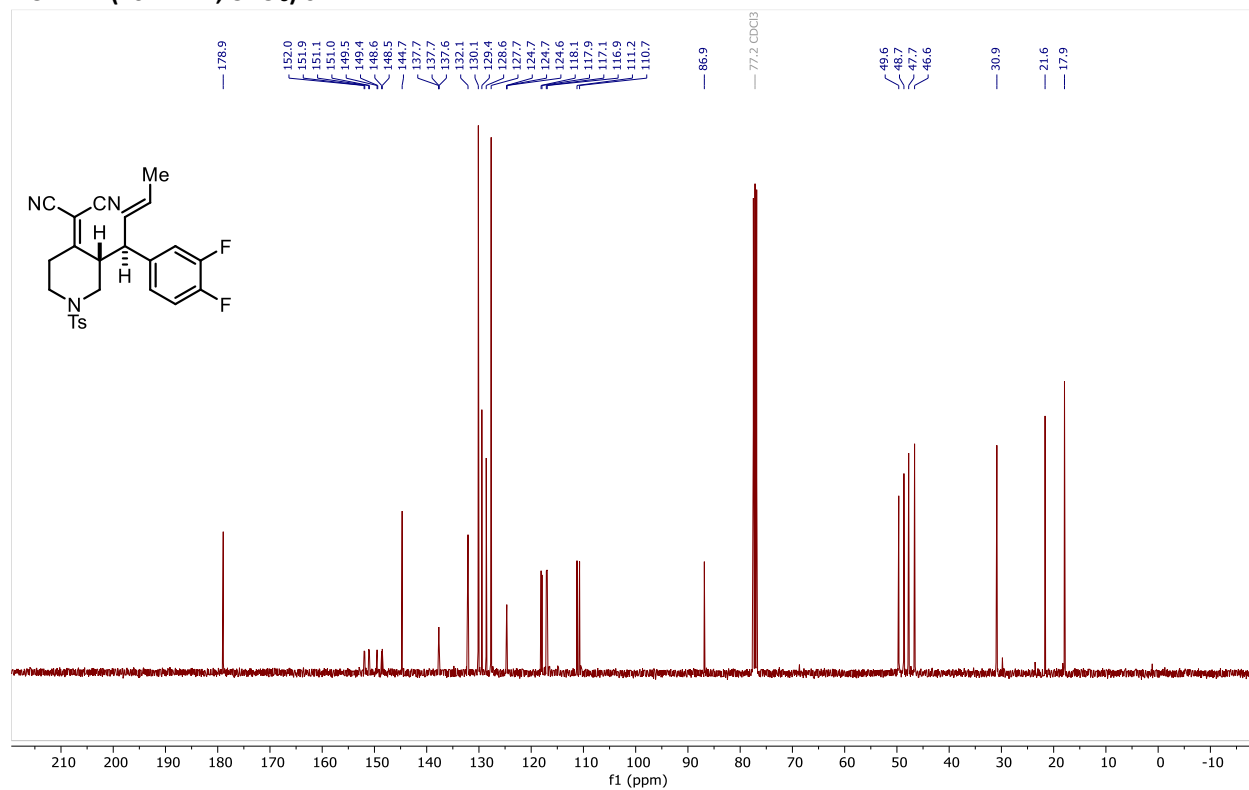

**$^{19}\text{F}$  NMR (377 MHz,  $\text{CDCl}_3$ ) of 4f**

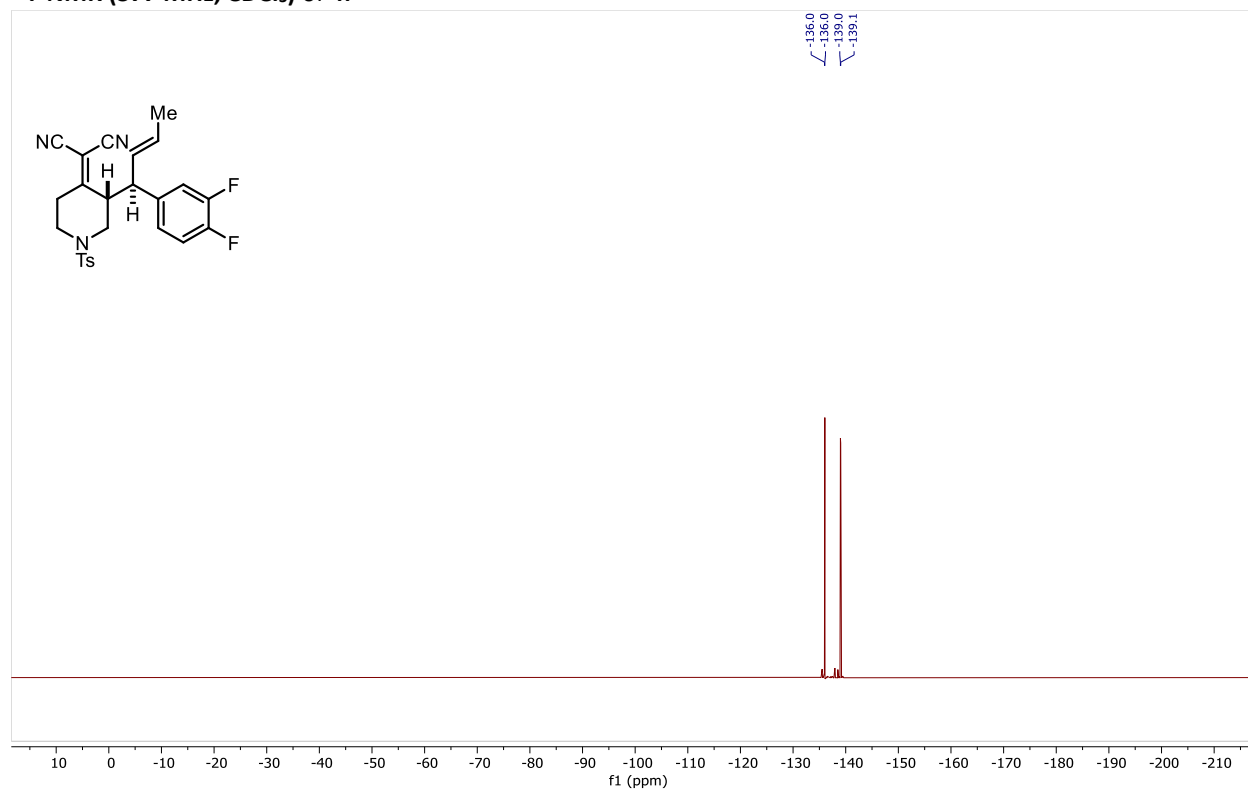

**$^1\text{H}$  NMR (400 MHz,  $\text{CDCl}_3$ ) of 4g**

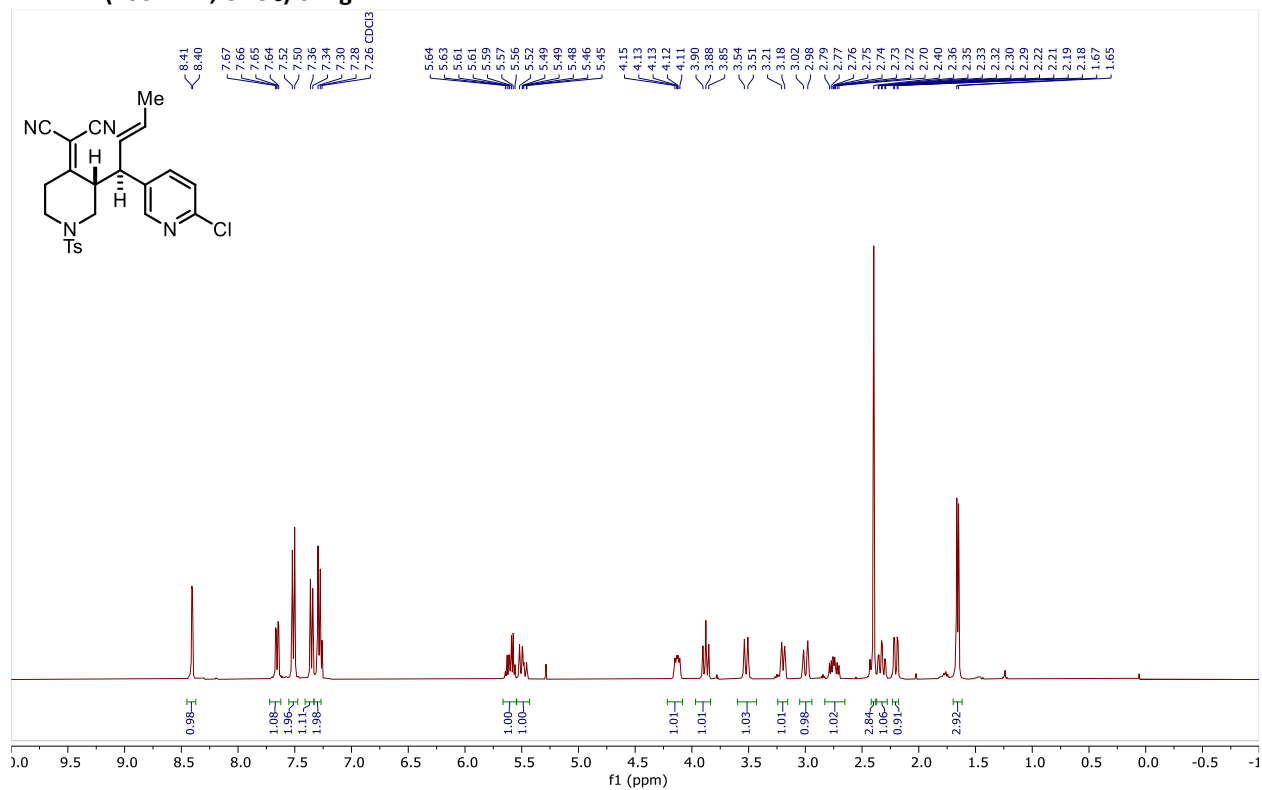



**<sup>13</sup>C NMR (101 MHz, CDCl<sub>3</sub>) of 4g**

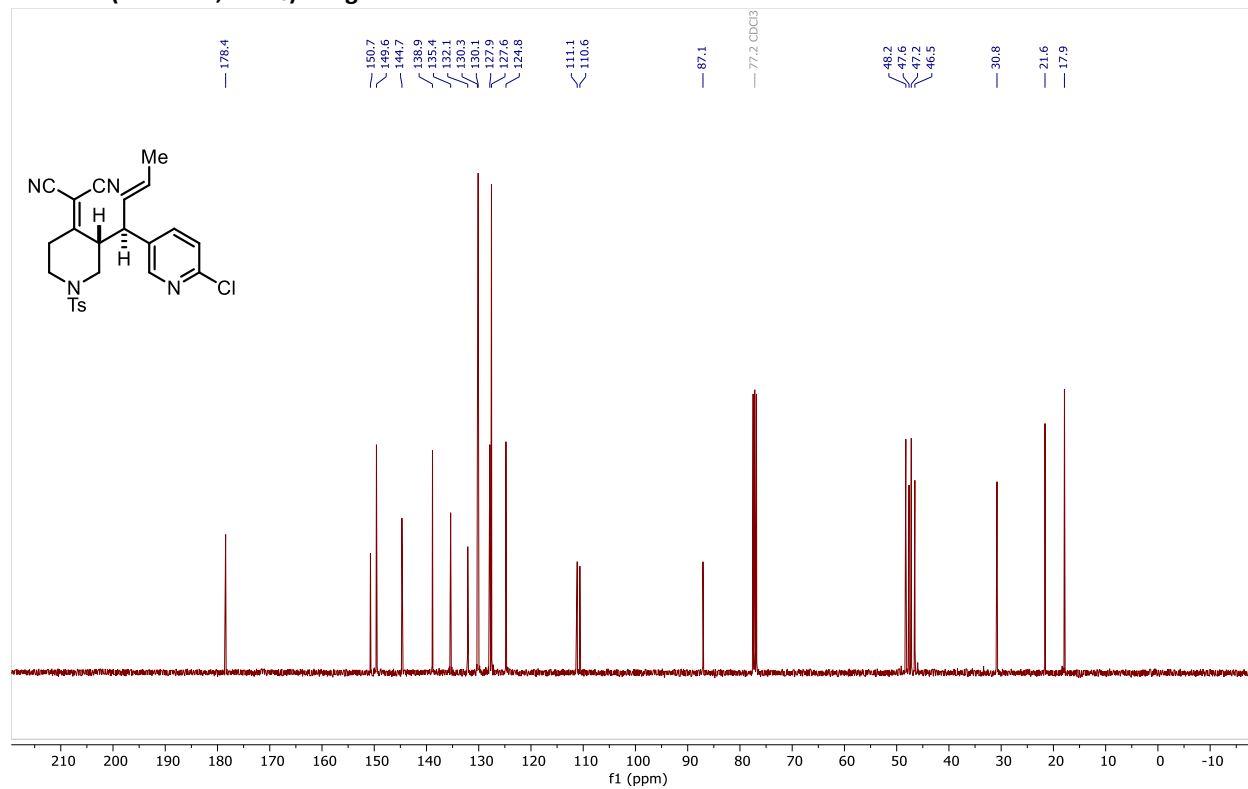

**<sup>1</sup>H NMR (400 MHz, CDCl<sub>3</sub>) of 4h**

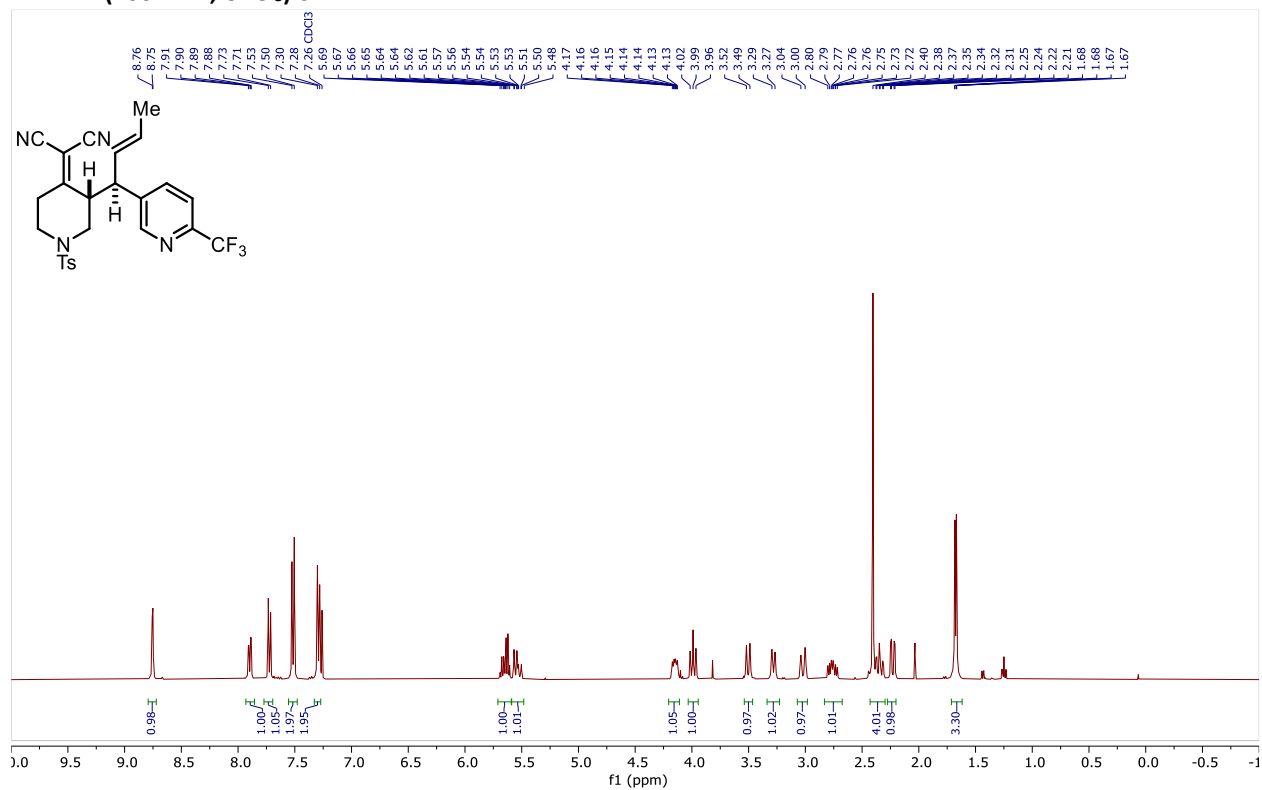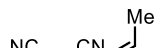

**<sup>13</sup>C NMR (101 MHz, CDCl<sub>3</sub>) of 4h**

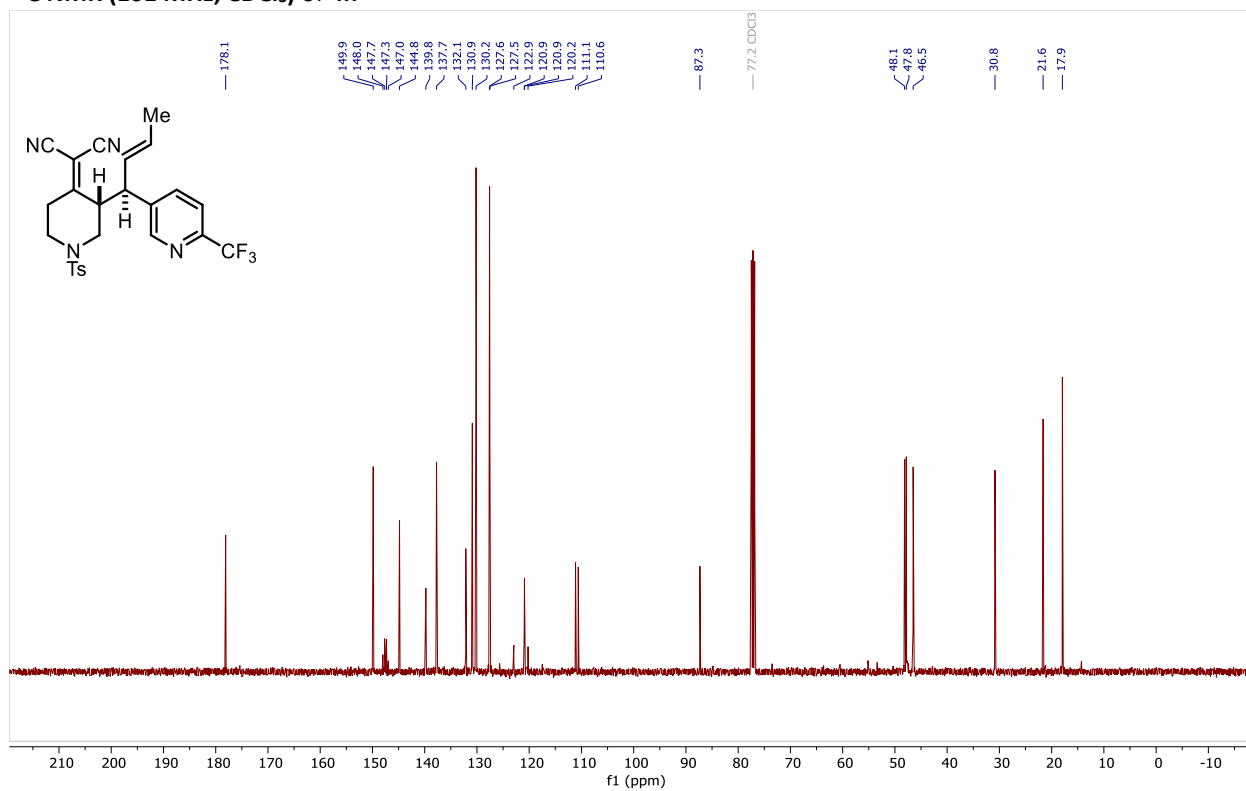

**<sup>19</sup>F NMR (377 MHz, CDCl<sub>3</sub>) of 4h**

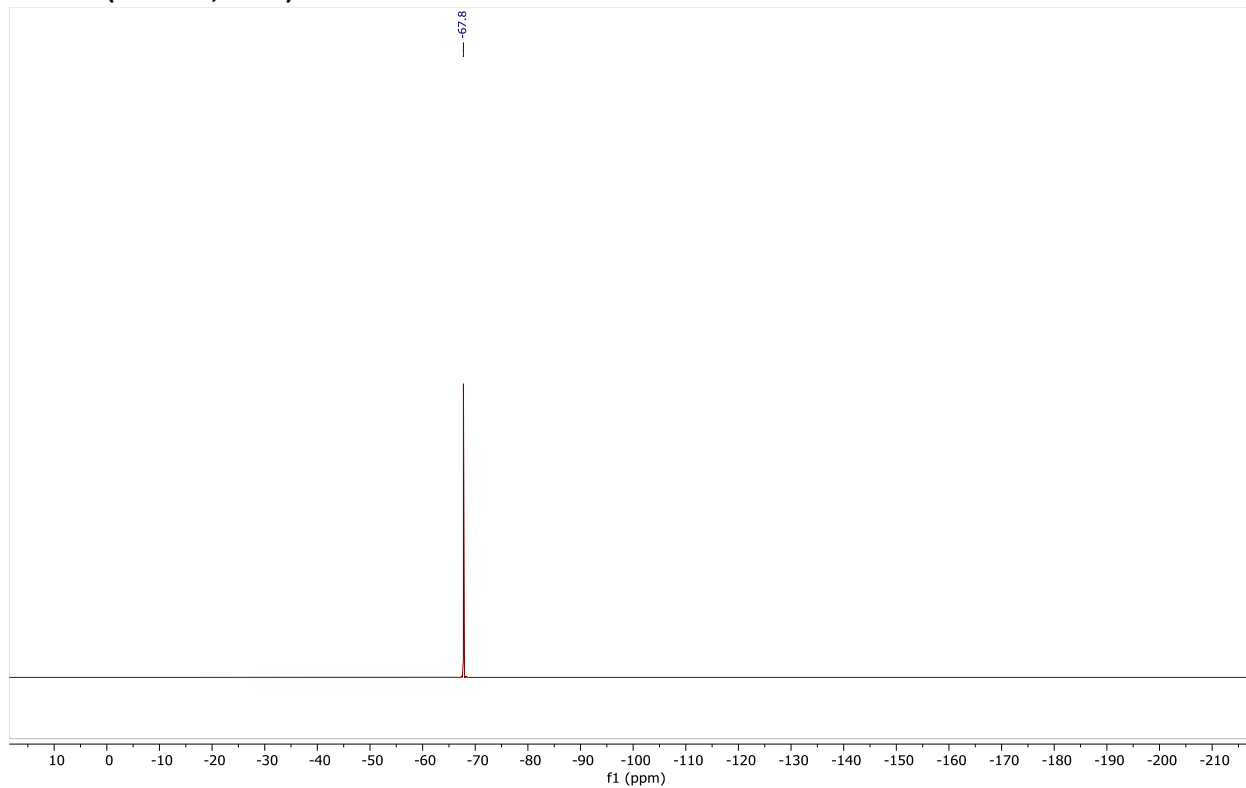

**<sup>1</sup>H NMR (400 MHz, CDCl<sub>3</sub>) of 4i**

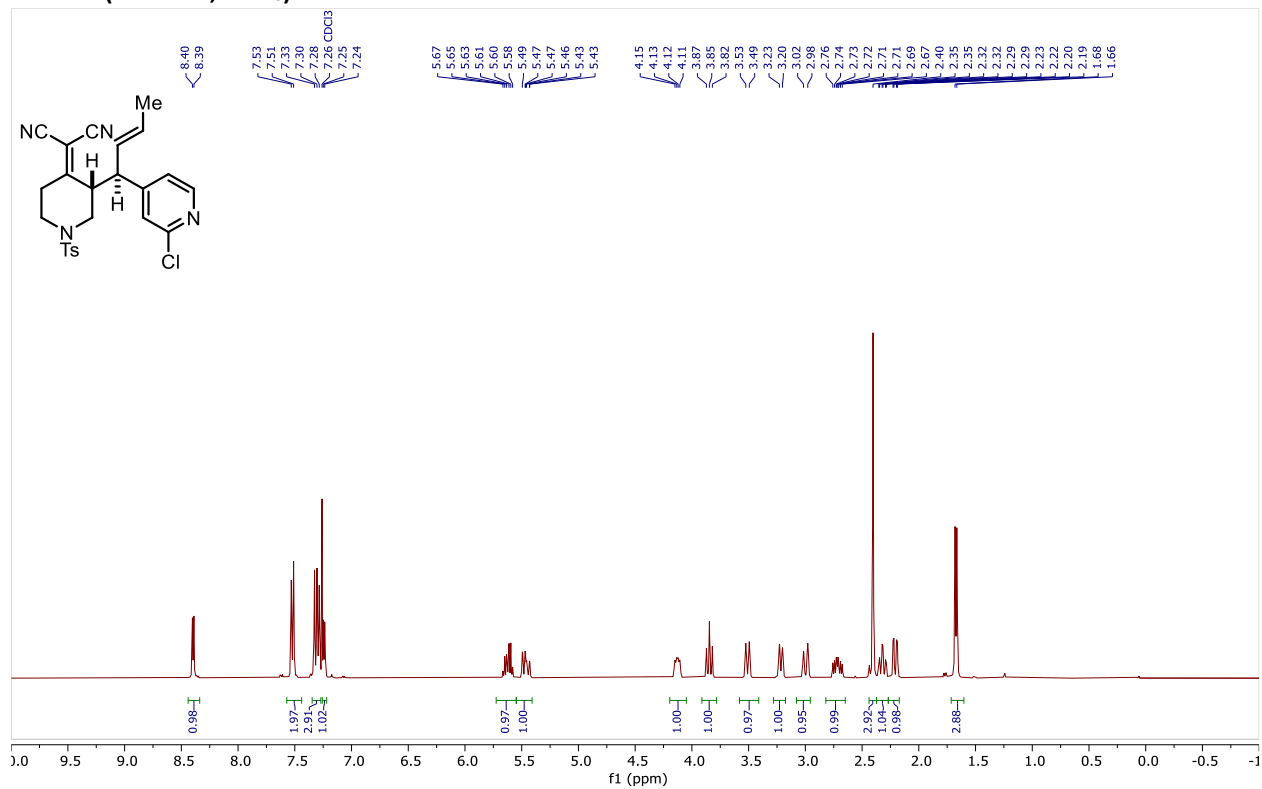

**<sup>13</sup>C NMR (101 MHz, CDCl<sub>3</sub>) of 4i**

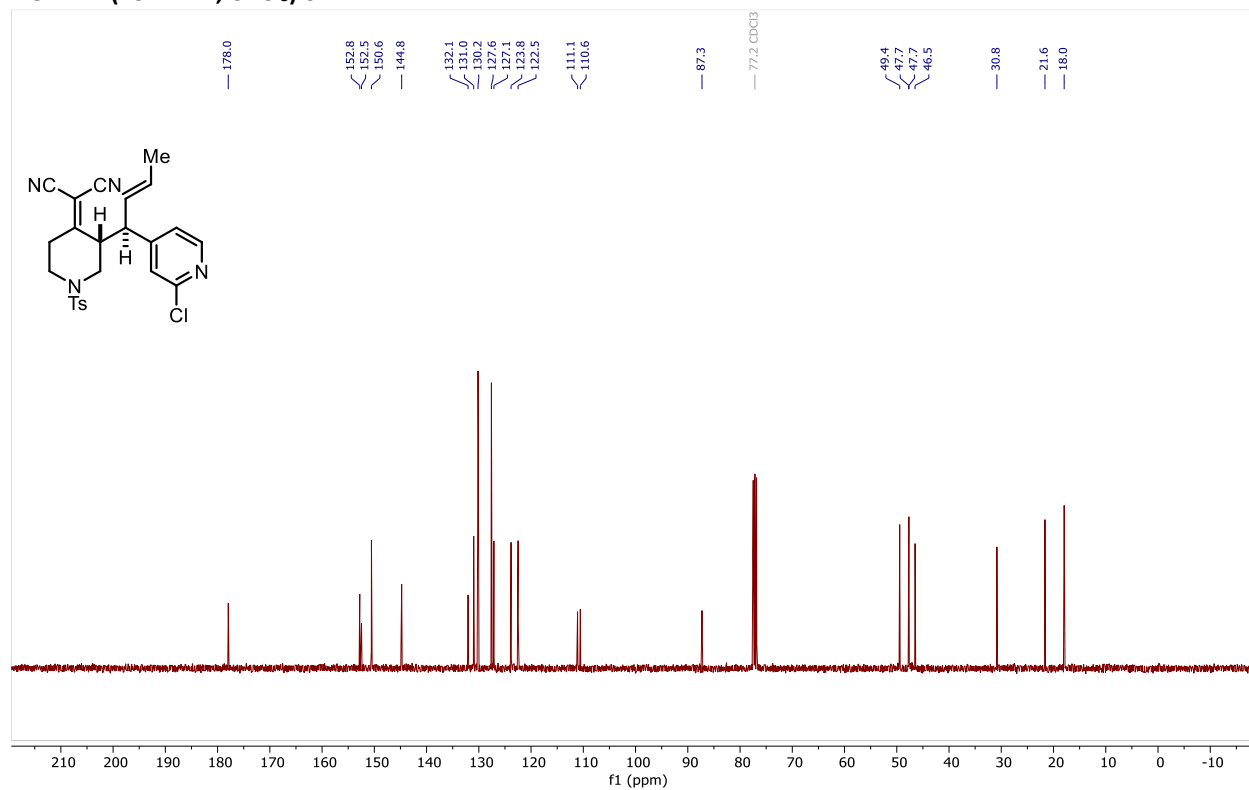

**<sup>1</sup>H NMR (400 MHz, CDCl<sub>3</sub>) of 4j**

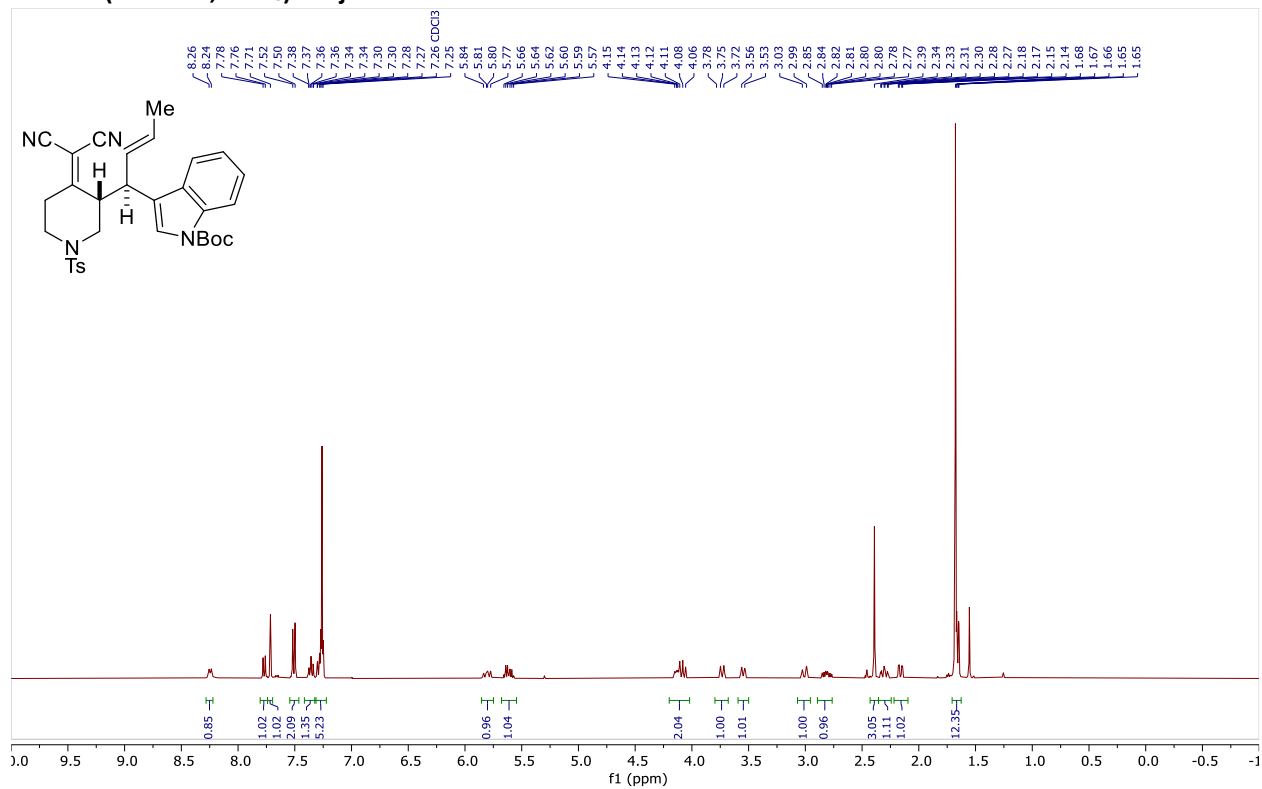

**<sup>13</sup>C NMR (101 MHz, CDCl<sub>3</sub>) of 4j**

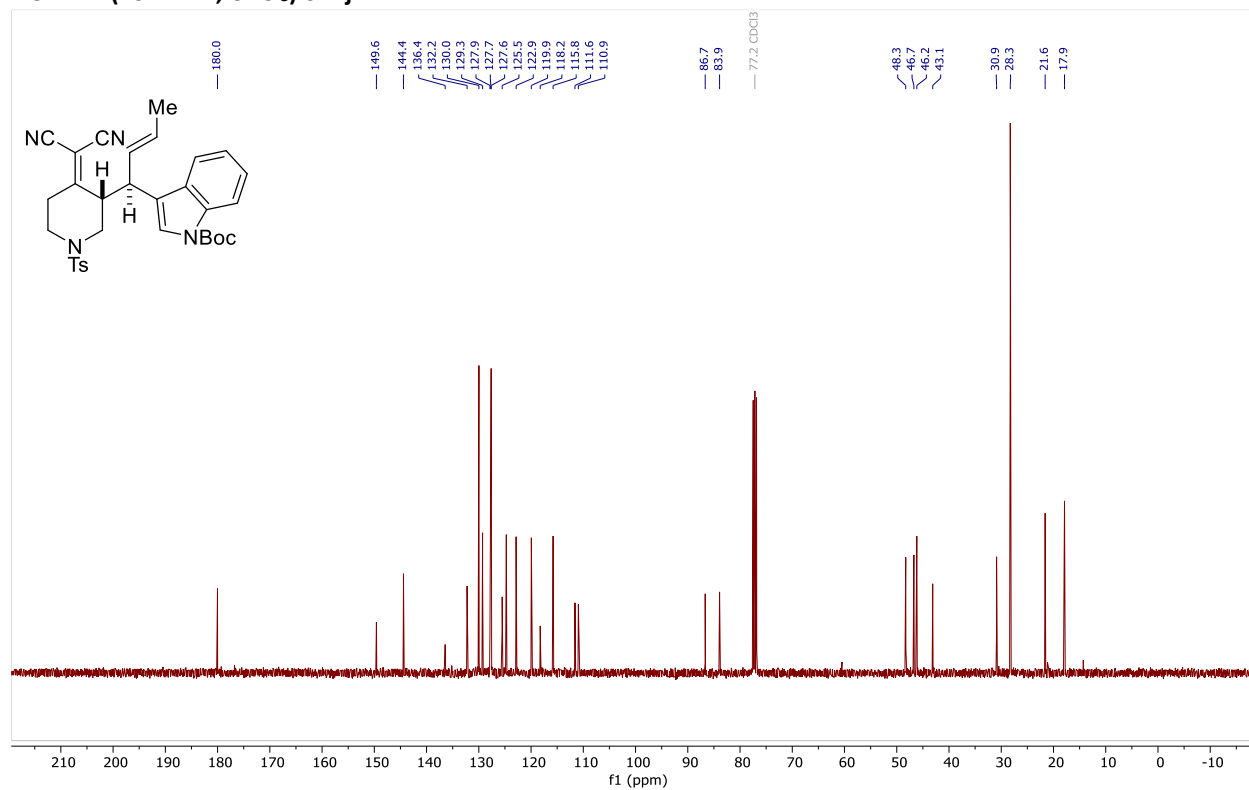

**<sup>1</sup>H NMR (400 MHz, CDCl<sub>3</sub>) of 4k**

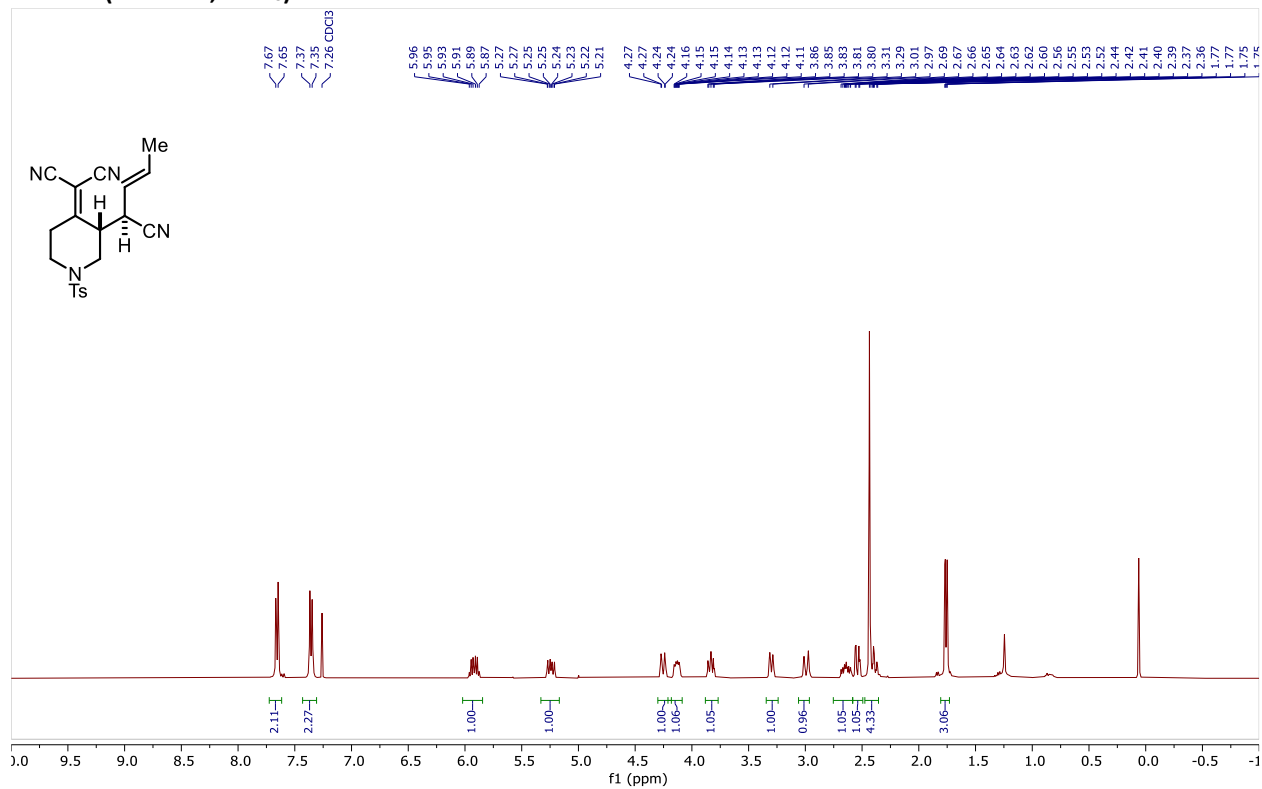

**<sup>13</sup>C NMR (101 MHz, CDCl<sub>3</sub>) of 4k**

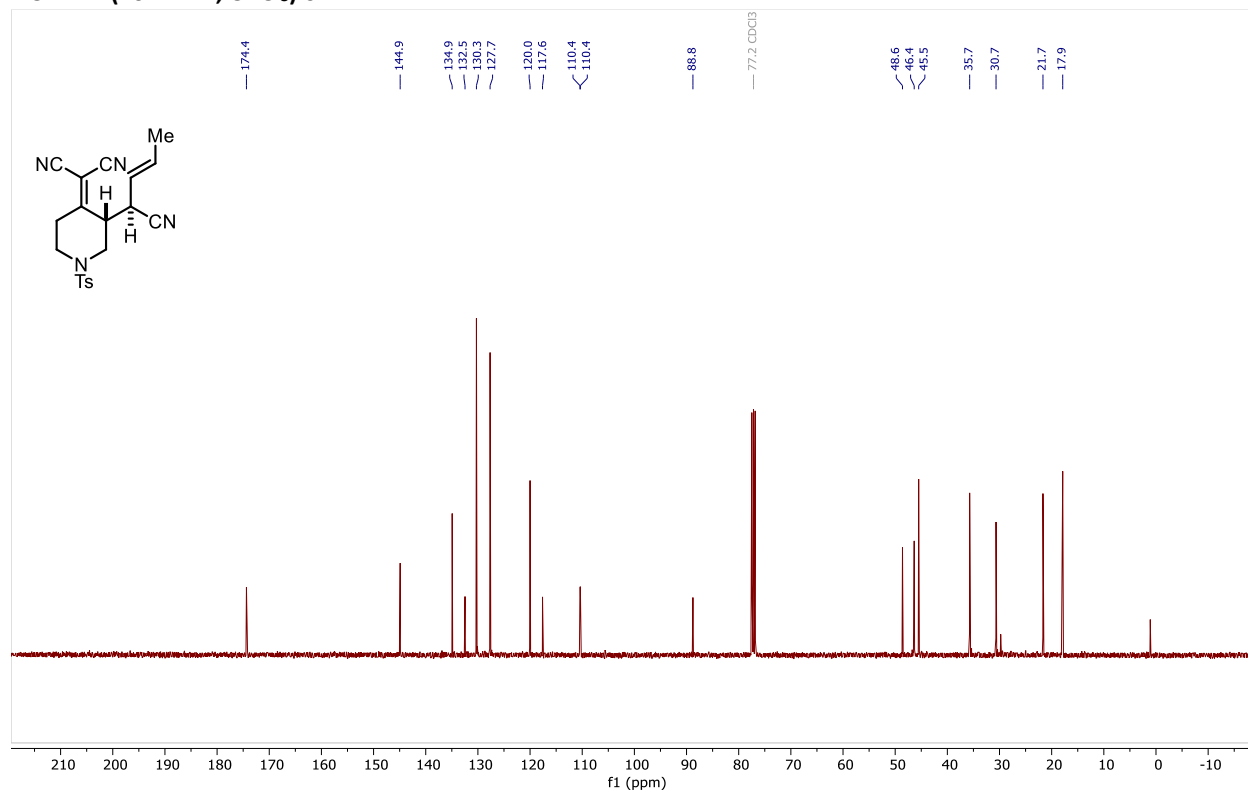

**<sup>1</sup>H NMR (500 MHz, DMSO-*d*<sub>6</sub>, 353 K) of 4I**

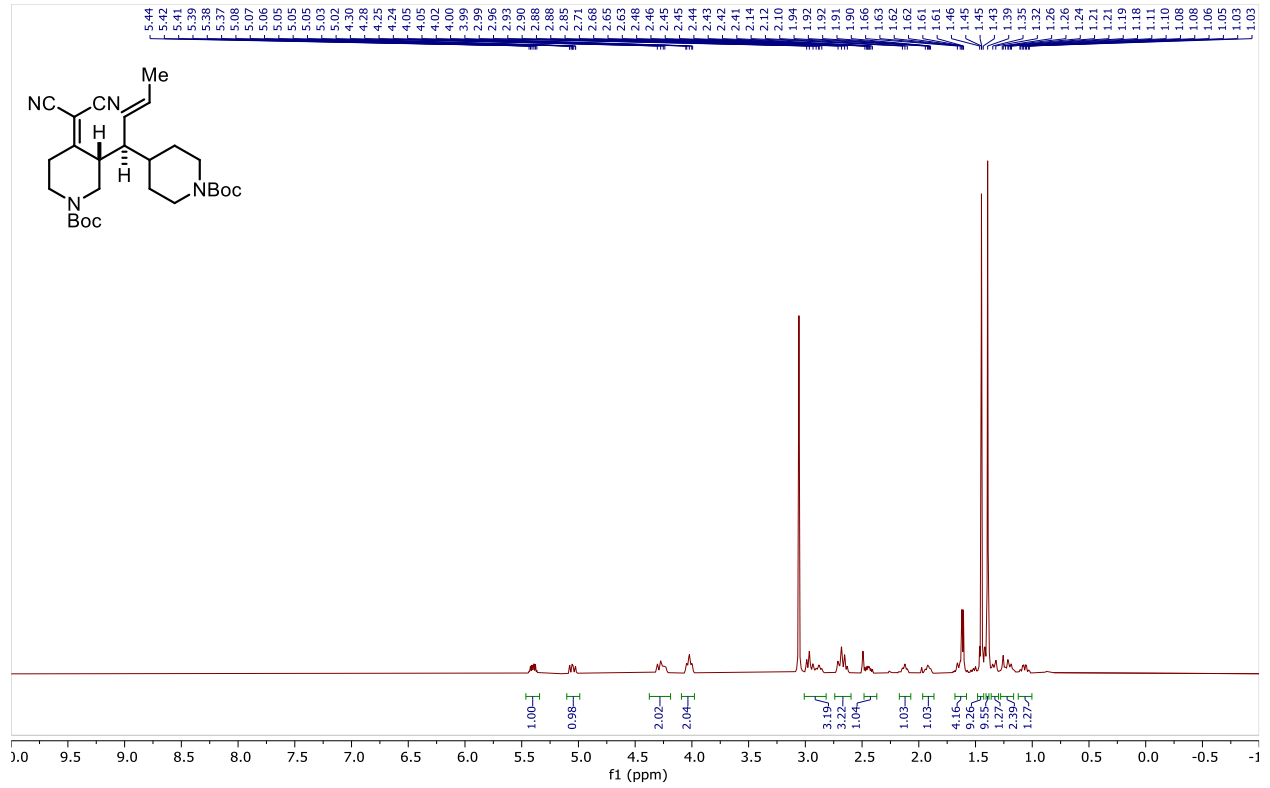

**<sup>13</sup>C NMR (126 MHz, DMSO-*d*<sub>6</sub>, 353 K) of 4I**

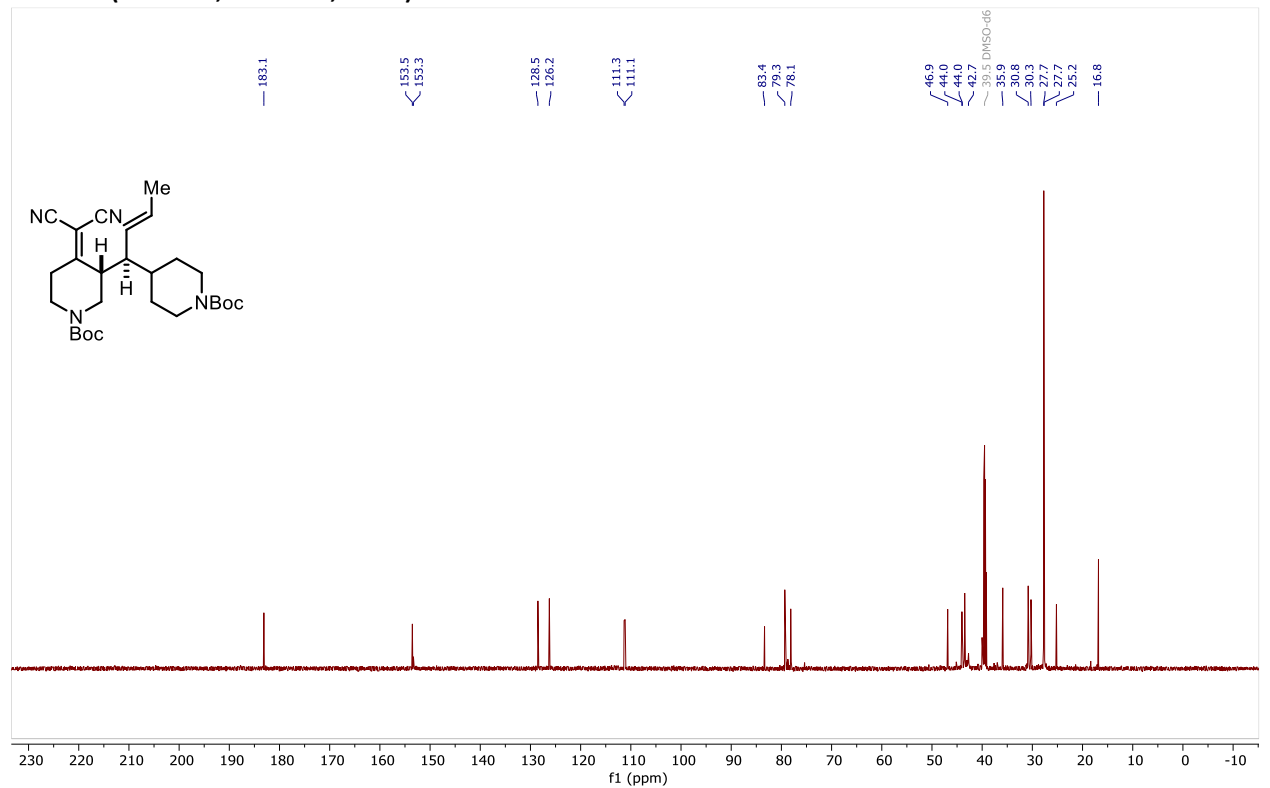

<sup>1</sup>H NMR (400 MHz, CDCl<sub>3</sub>) of 4m

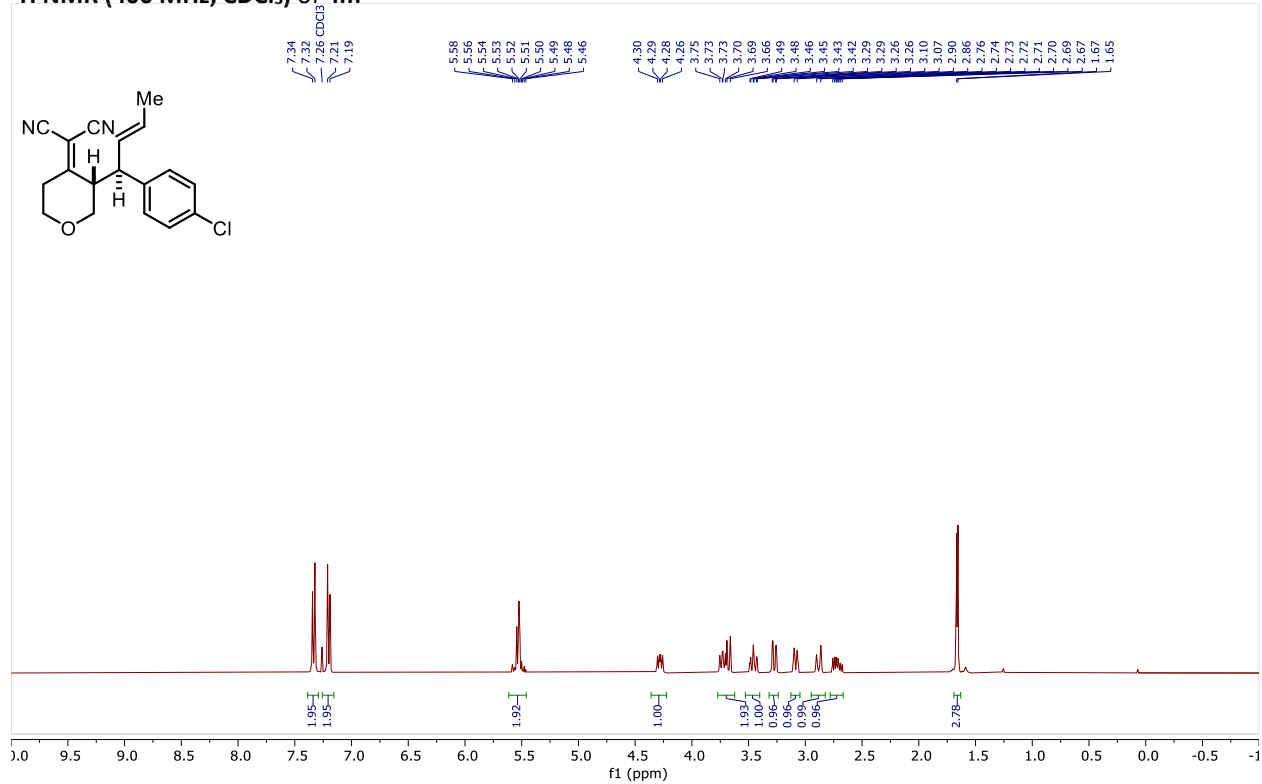

<sup>13</sup>C NMR (101 MHz, CDCl<sub>3</sub>) of 4m

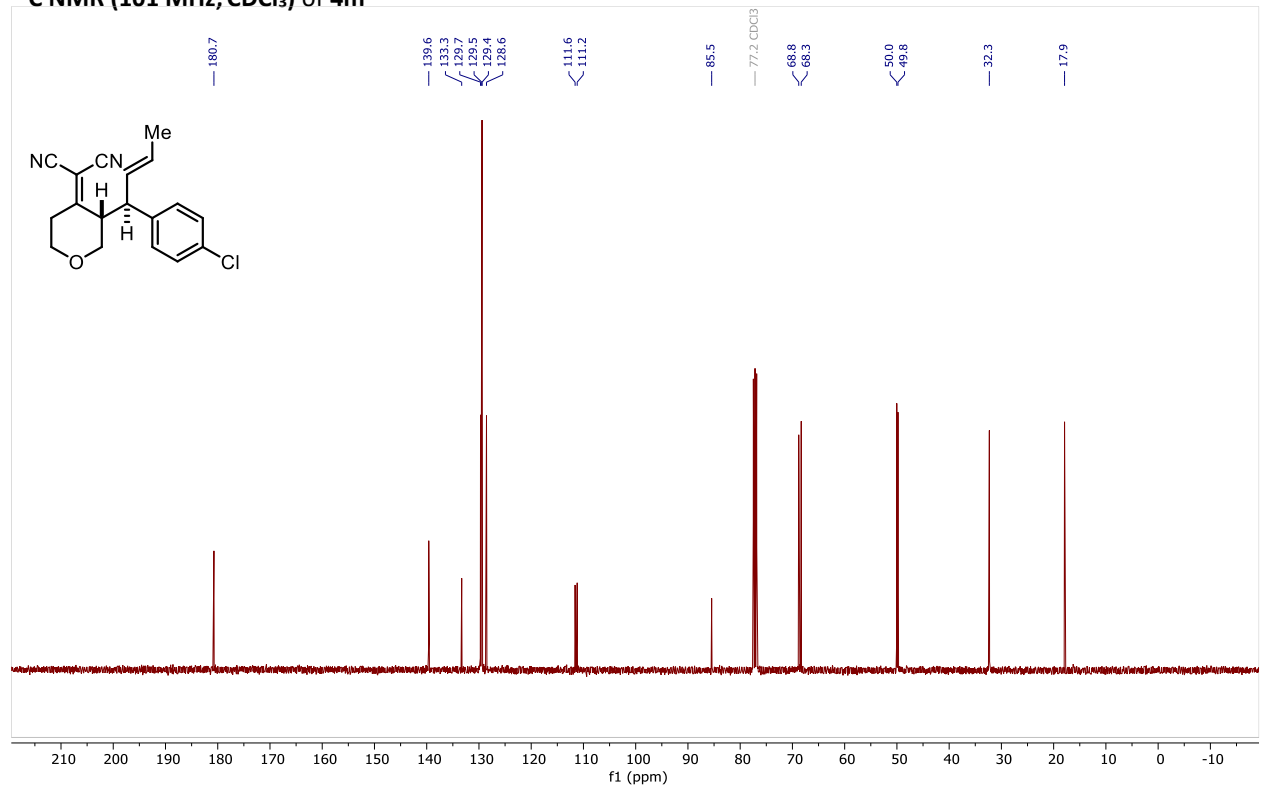

<sup>1</sup>H NMR (400 MHz, CDCl<sub>3</sub>) of 4n

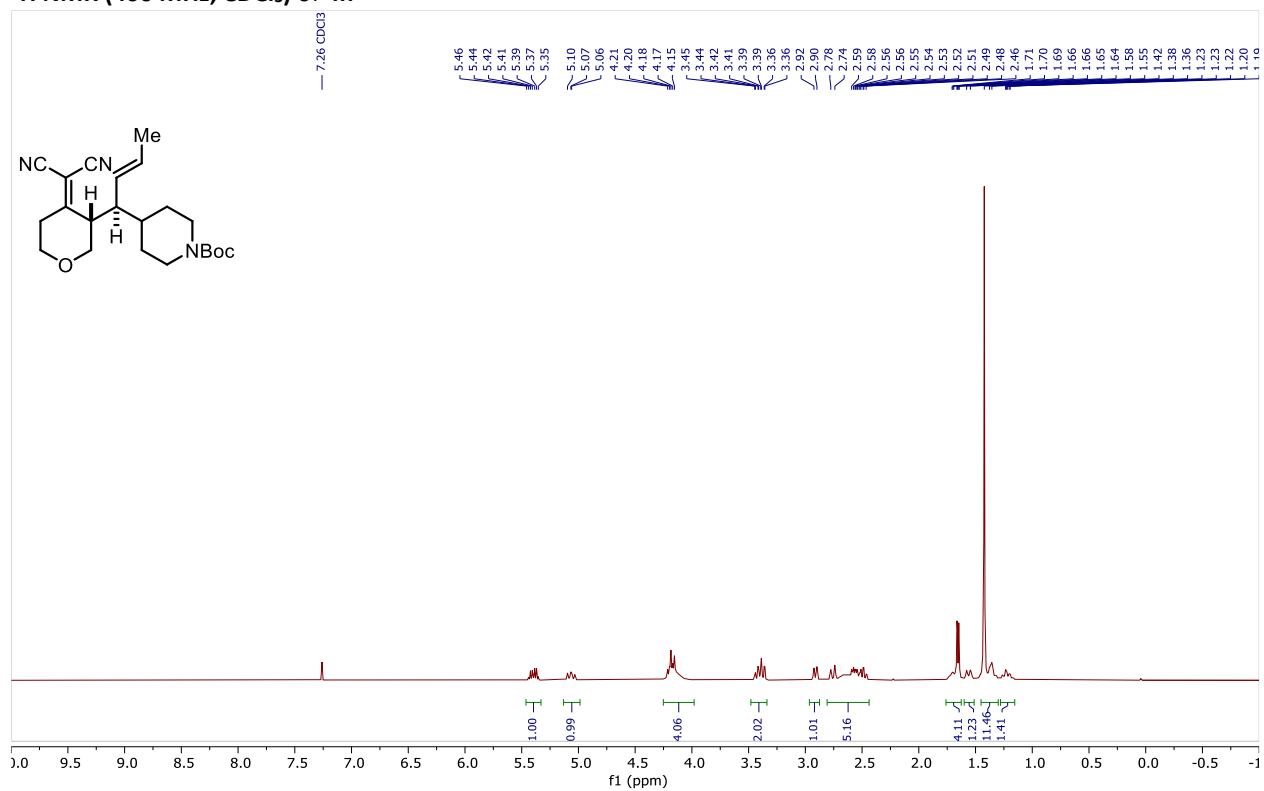

<sup>13</sup>C NMR (101 MHz, CDCl<sub>3</sub>) of 4n

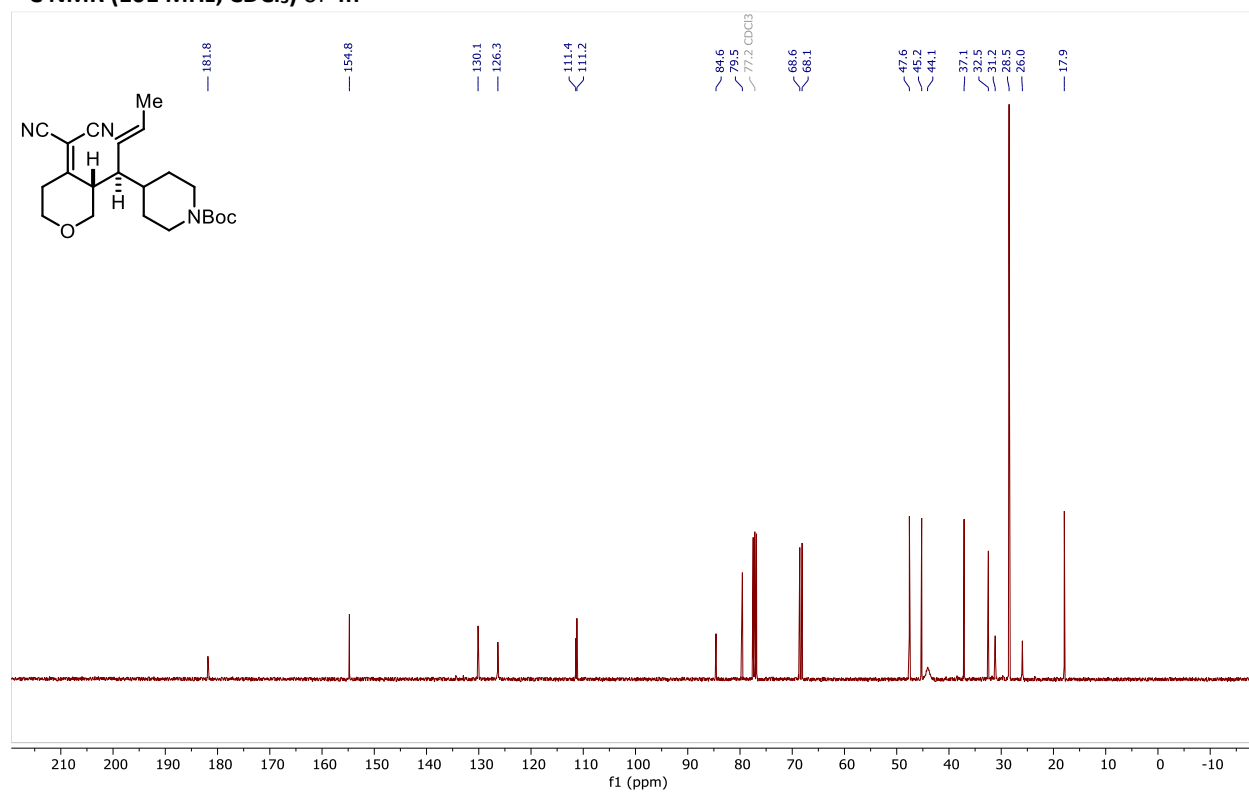



**<sup>1</sup>H NMR (400 MHz, CDCl<sub>3</sub>) of 4o**

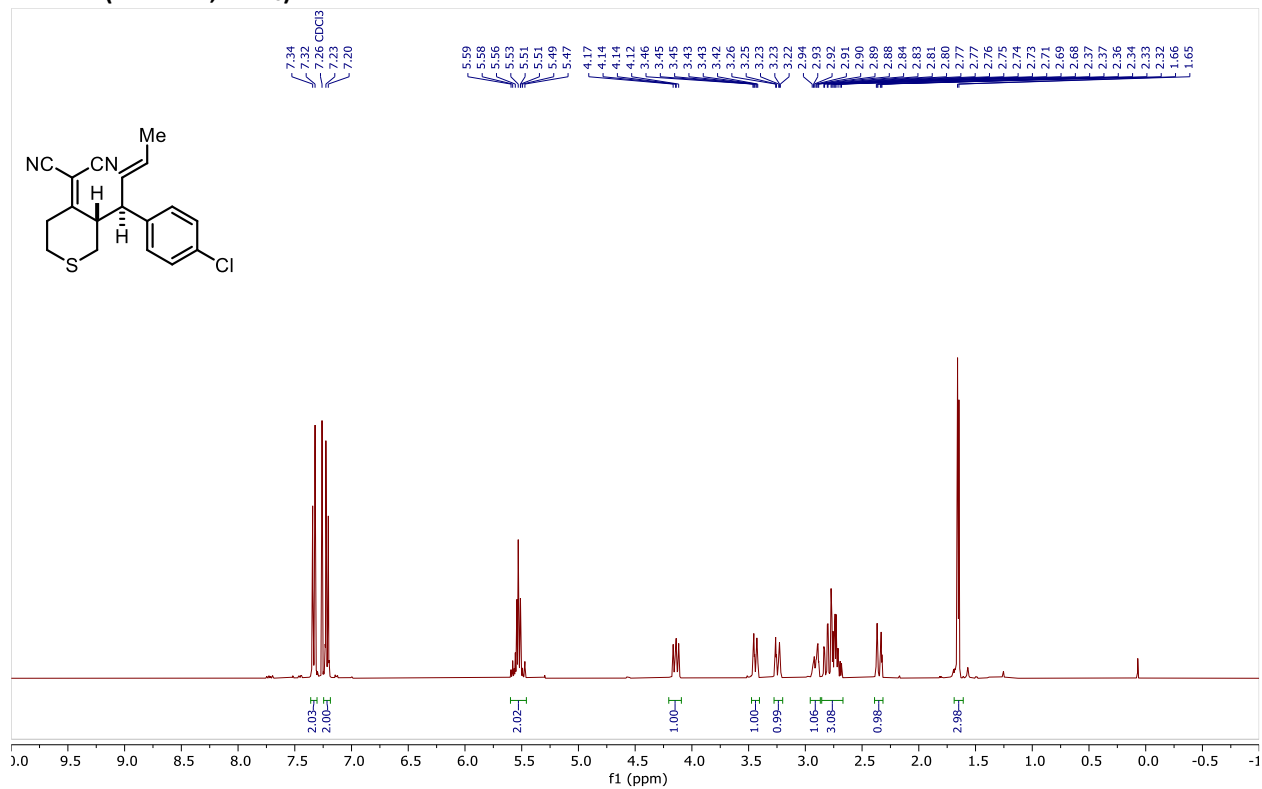

**<sup>13</sup>C NMR (101 MHz, CDCl<sub>3</sub>) of 4o**

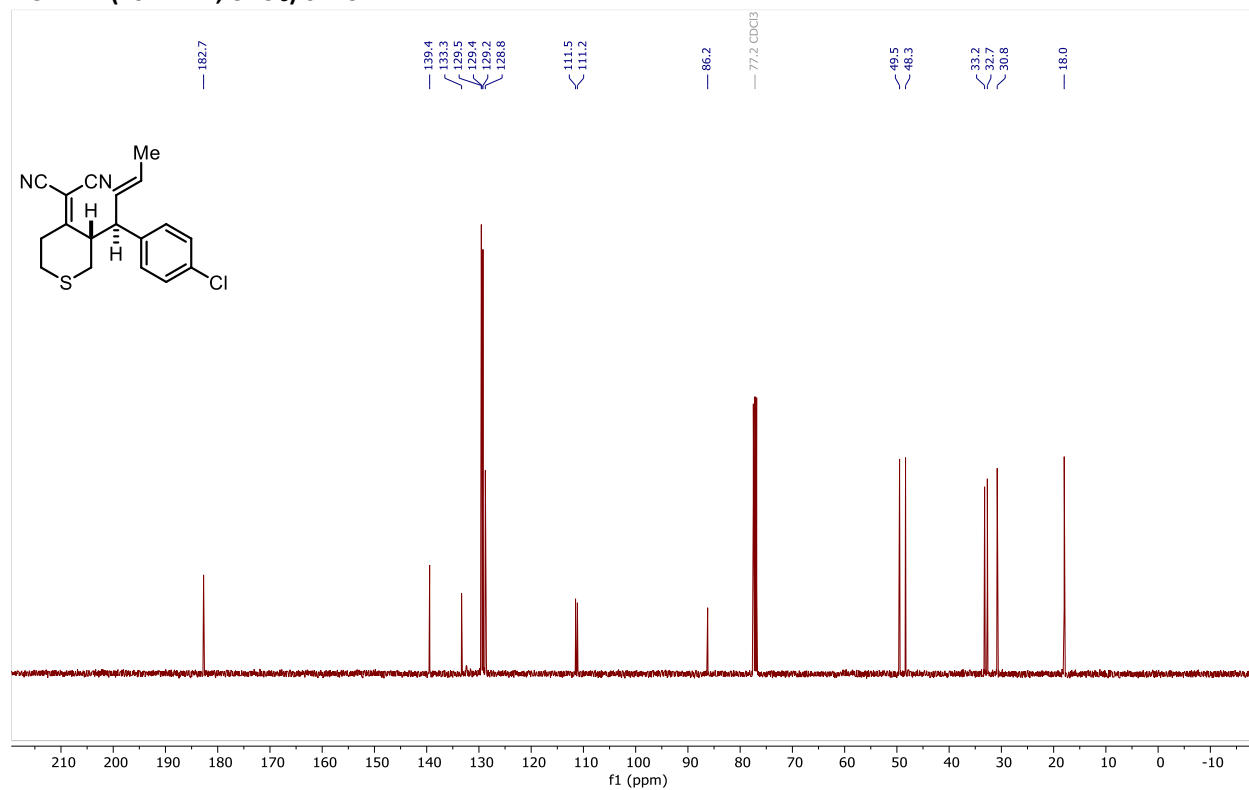

**<sup>1</sup>H NMR (400 MHz, CDCl<sub>3</sub>) of 4p**

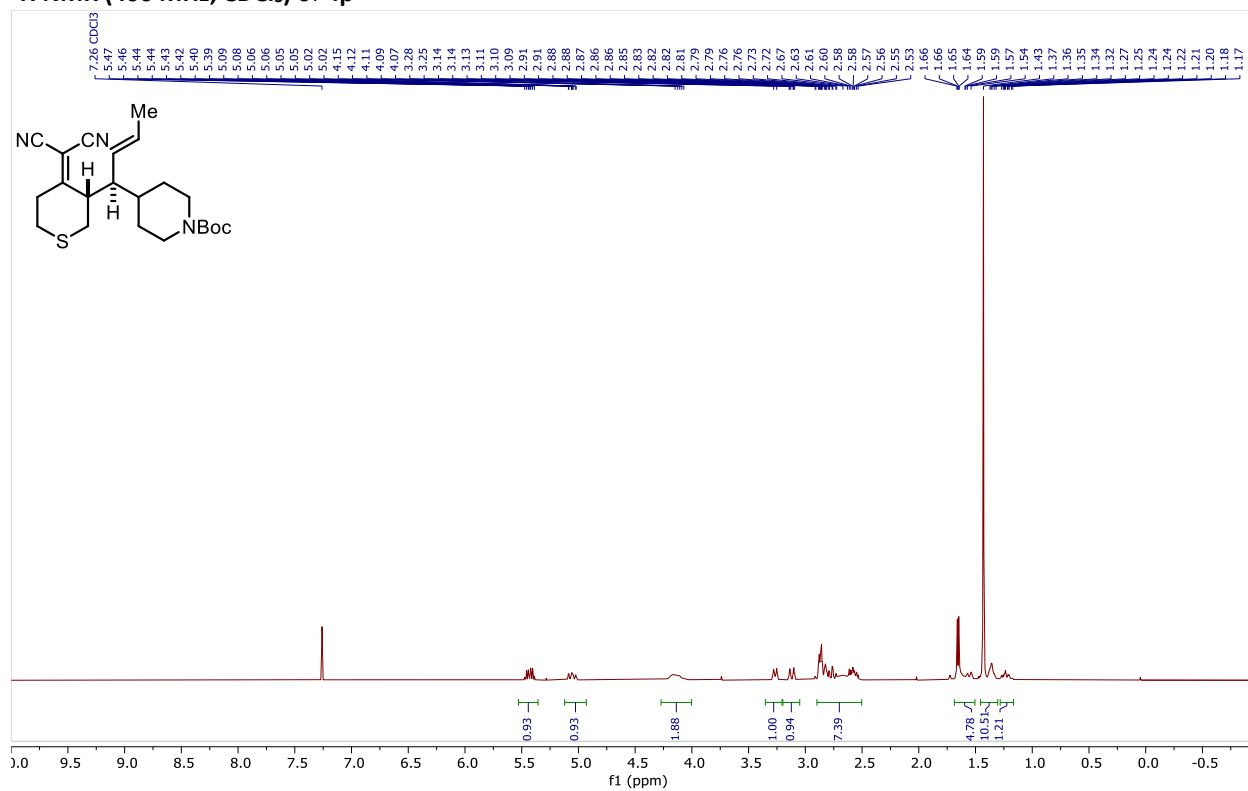

**<sup>13</sup>C NMR (101 MHz, CDCl<sub>3</sub>) of 4p**

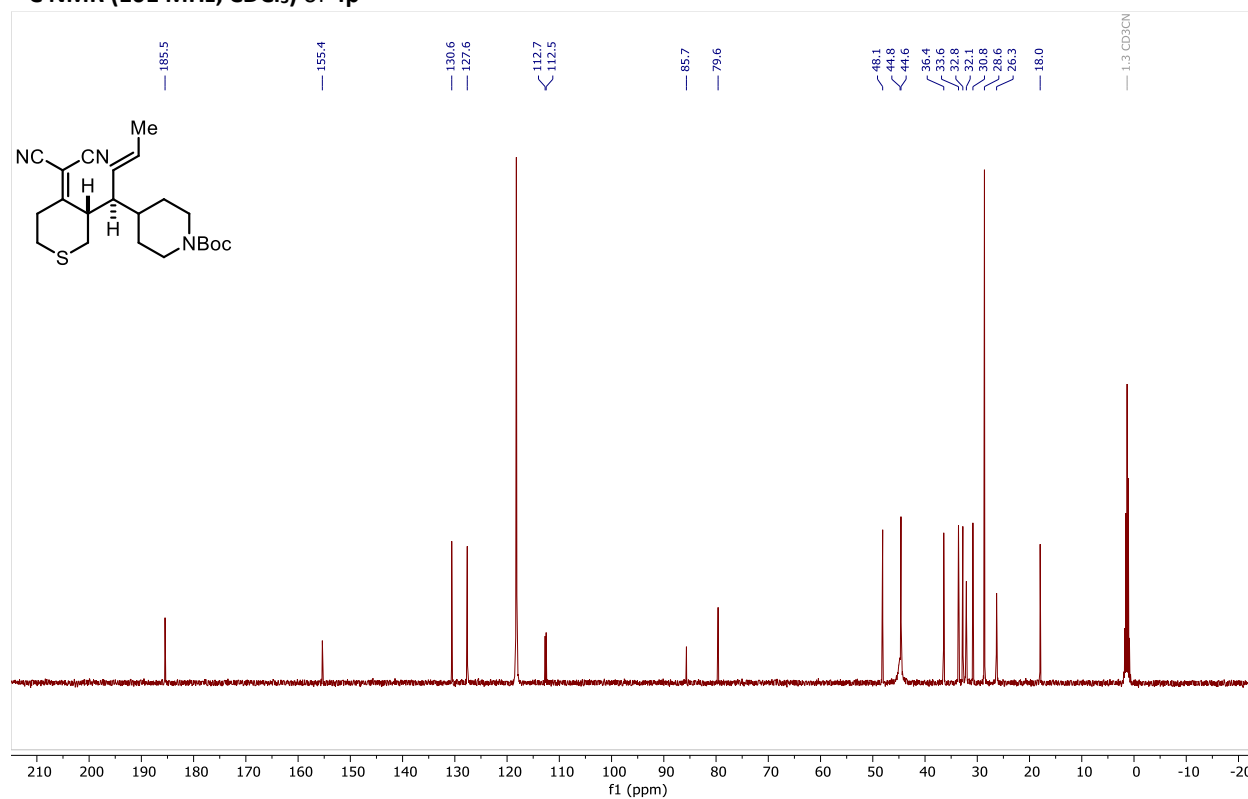

**<sup>1</sup>H NMR (400 MHz, CDCl<sub>3</sub>) of 4q**

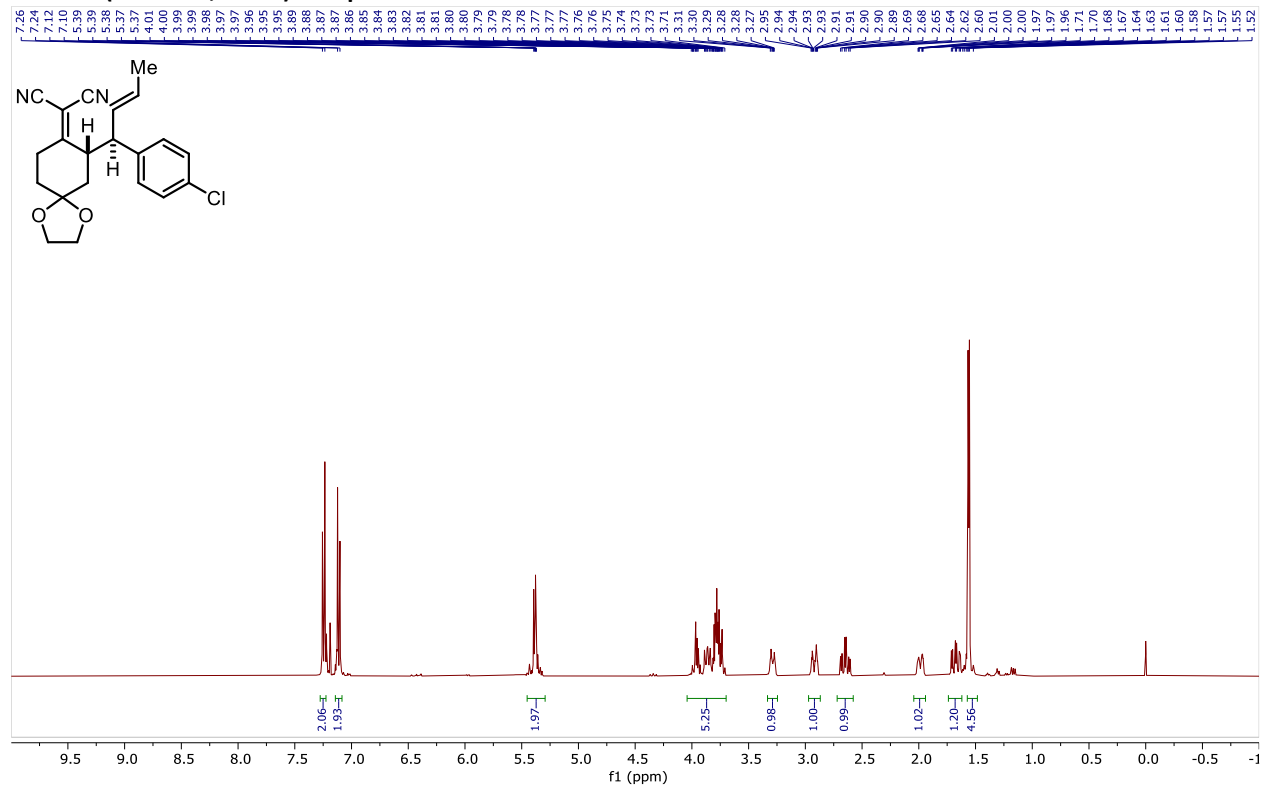

**<sup>13</sup>C NMR (101 MHz, CDCl<sub>3</sub>) of 4q**

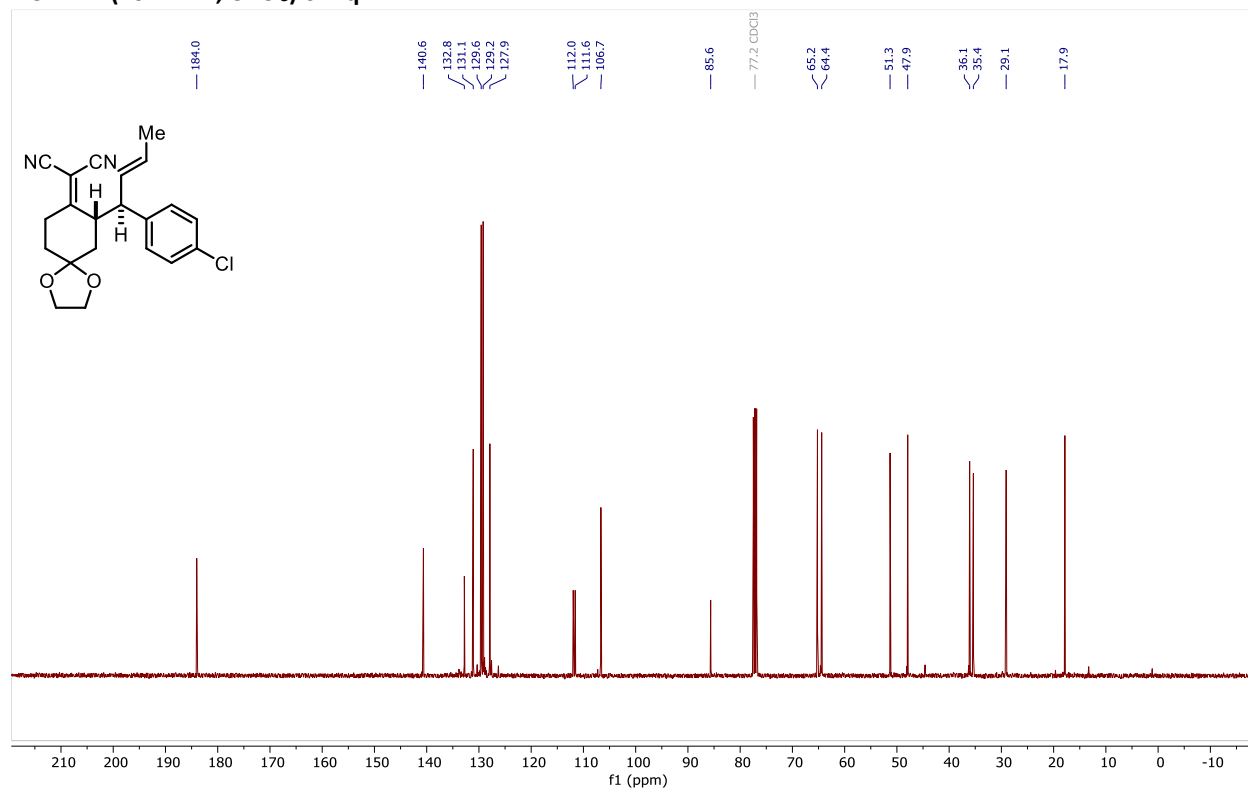

**<sup>1</sup>H NMR (400 MHz, CD<sub>3</sub>CN) of 4r**

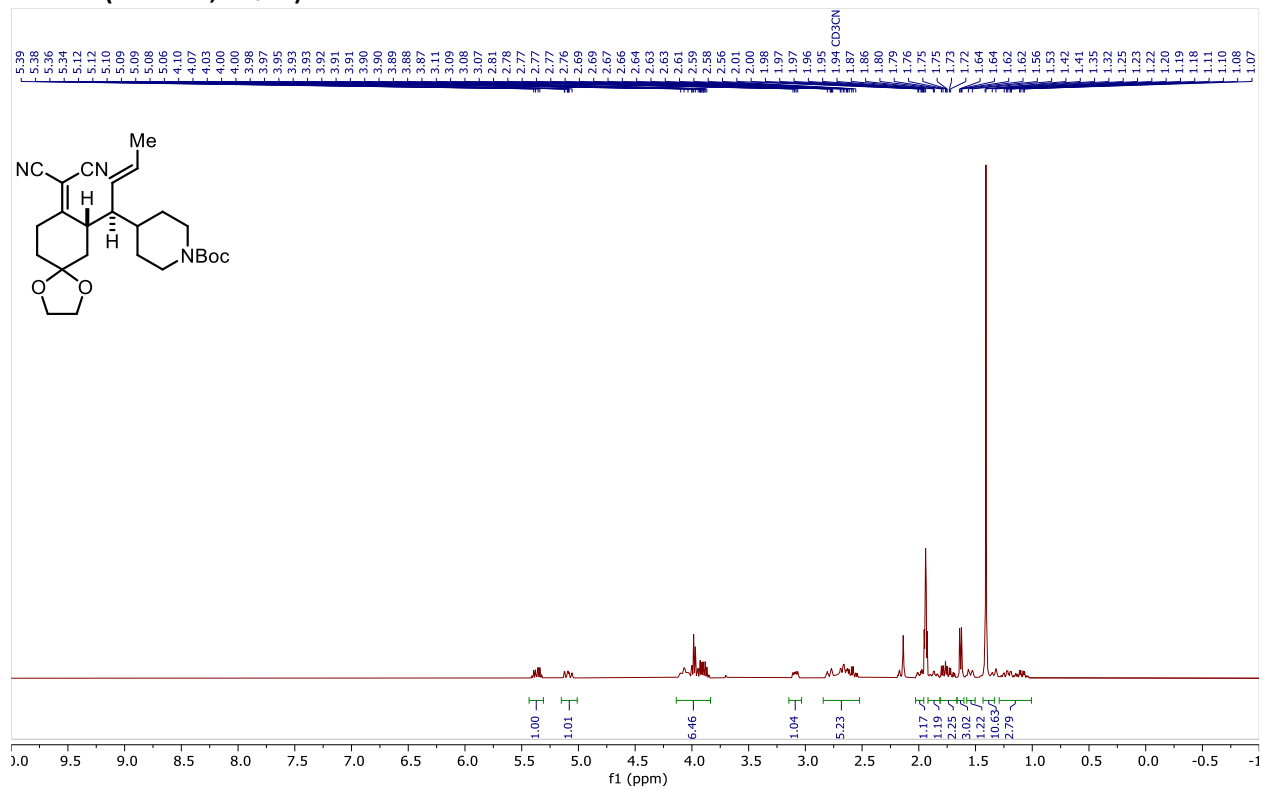

**<sup>13</sup>C NMR (101 MHz, CD<sub>3</sub>CN) of 4r**

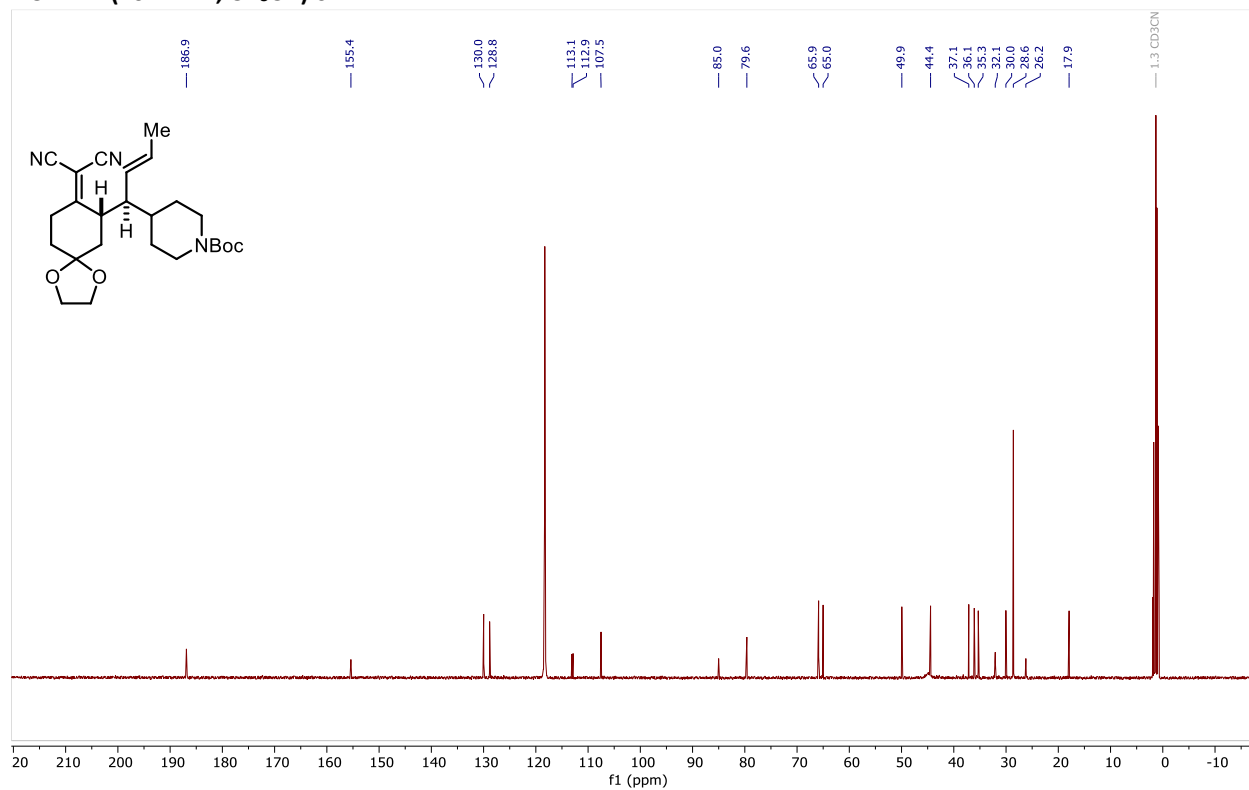

**<sup>1</sup>H NMR (400 MHz, CD<sub>3</sub>CN) of 4u**

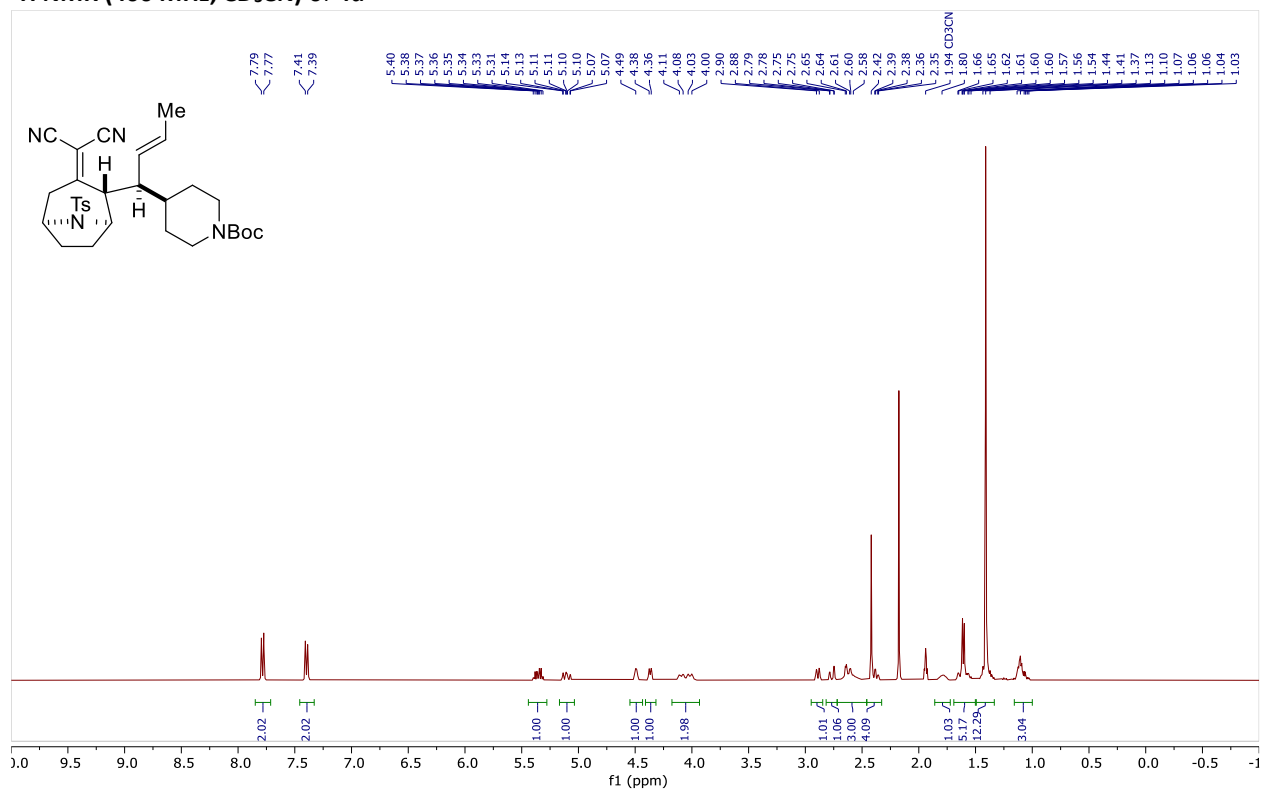

**<sup>13</sup>C NMR (101 MHz, CD<sub>3</sub>CN) of 4u**

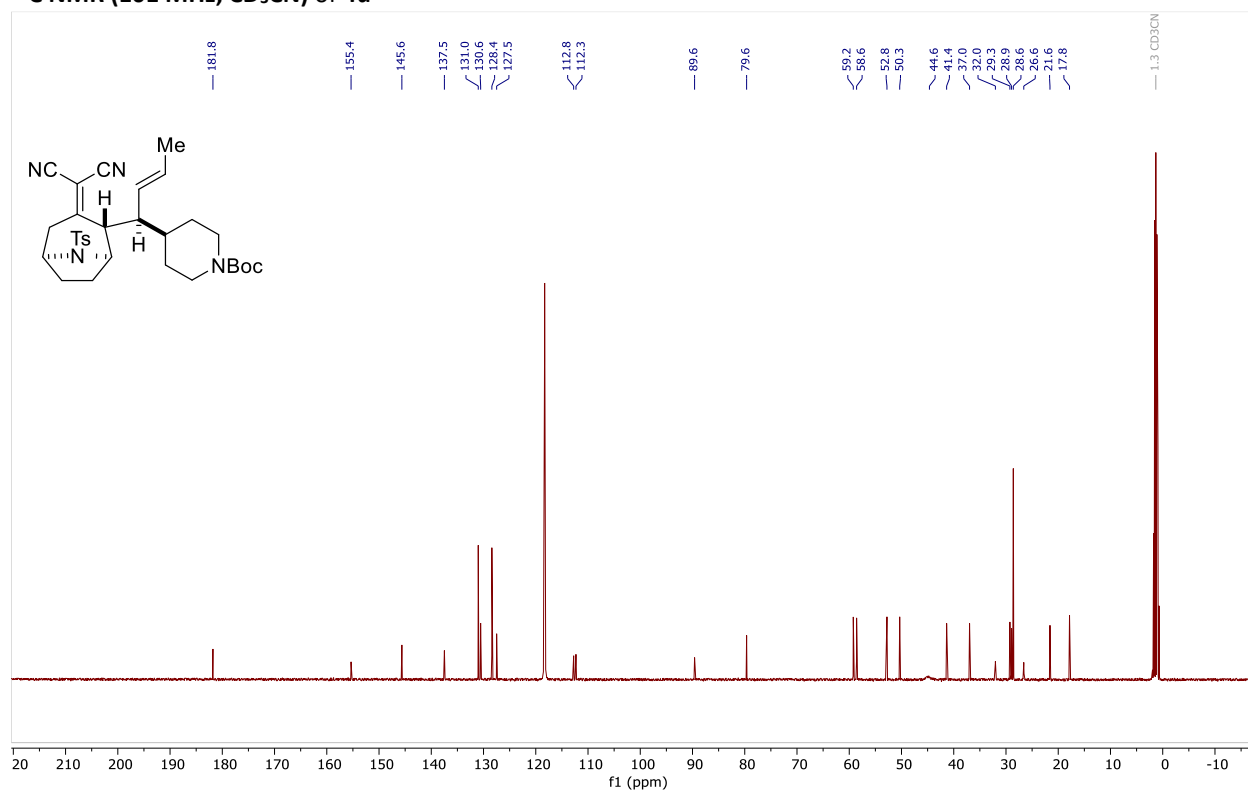

**<sup>1</sup>H NMR (400 MHz, CDCl<sub>3</sub>) of 4v**

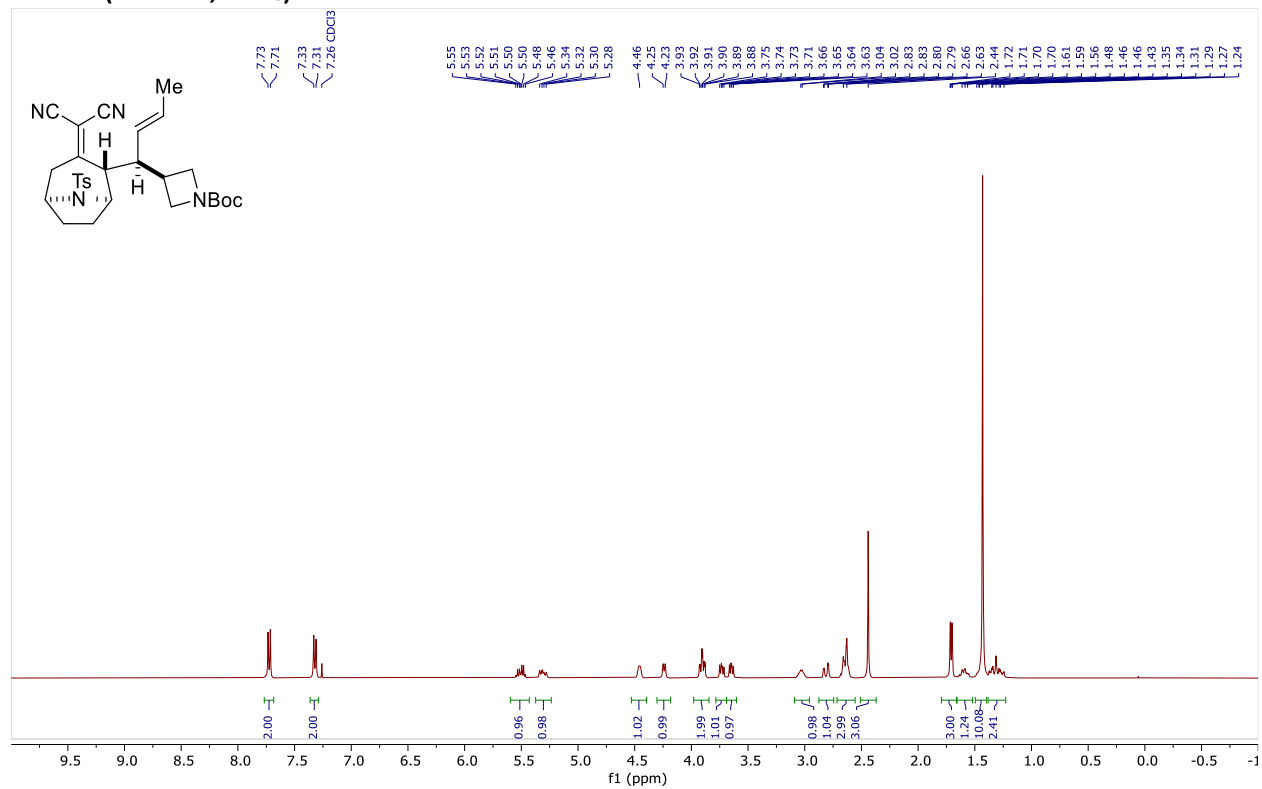

**<sup>13</sup>C NMR (101 MHz, CDCl<sub>3</sub>) of 4v**

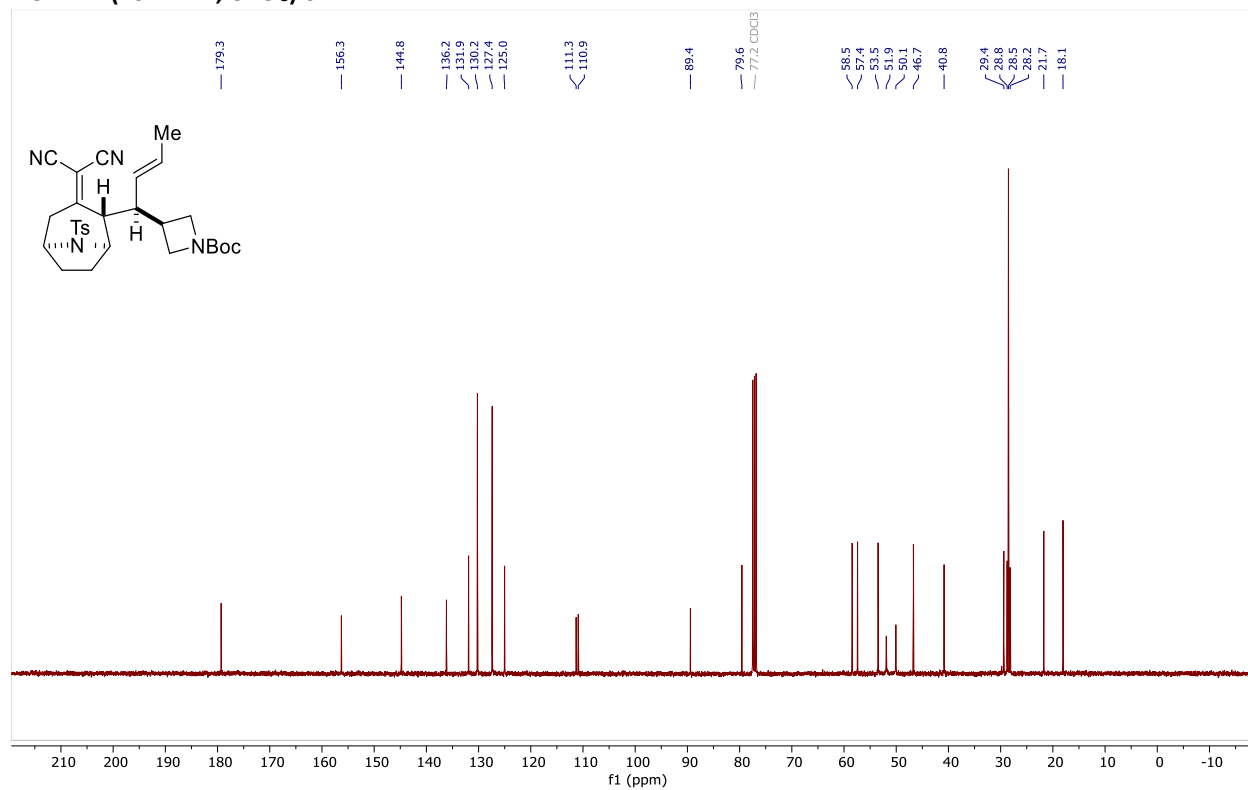

<sup>1</sup>H NMR (400 MHz, CDCl<sub>3</sub>) of 4w

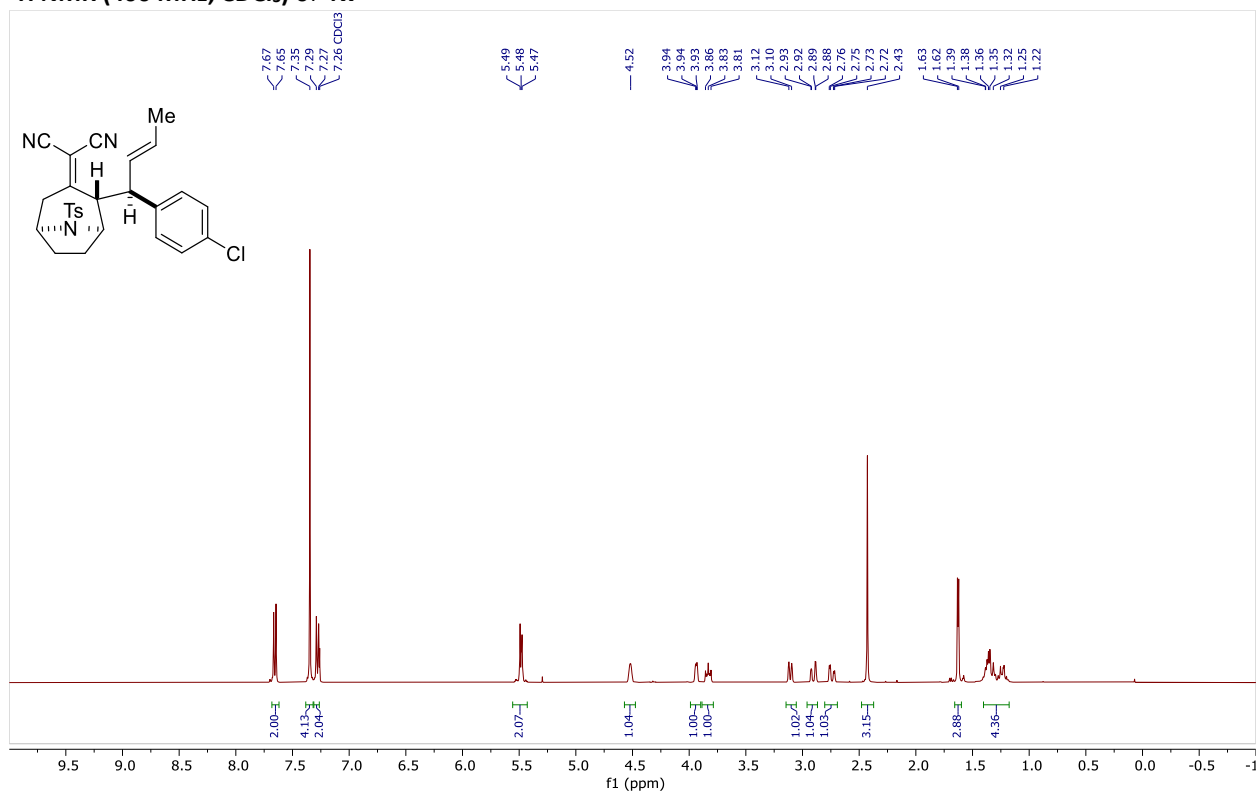

<sup>13</sup>C NMR (101 MHz, CDCl<sub>3</sub>) of 4w

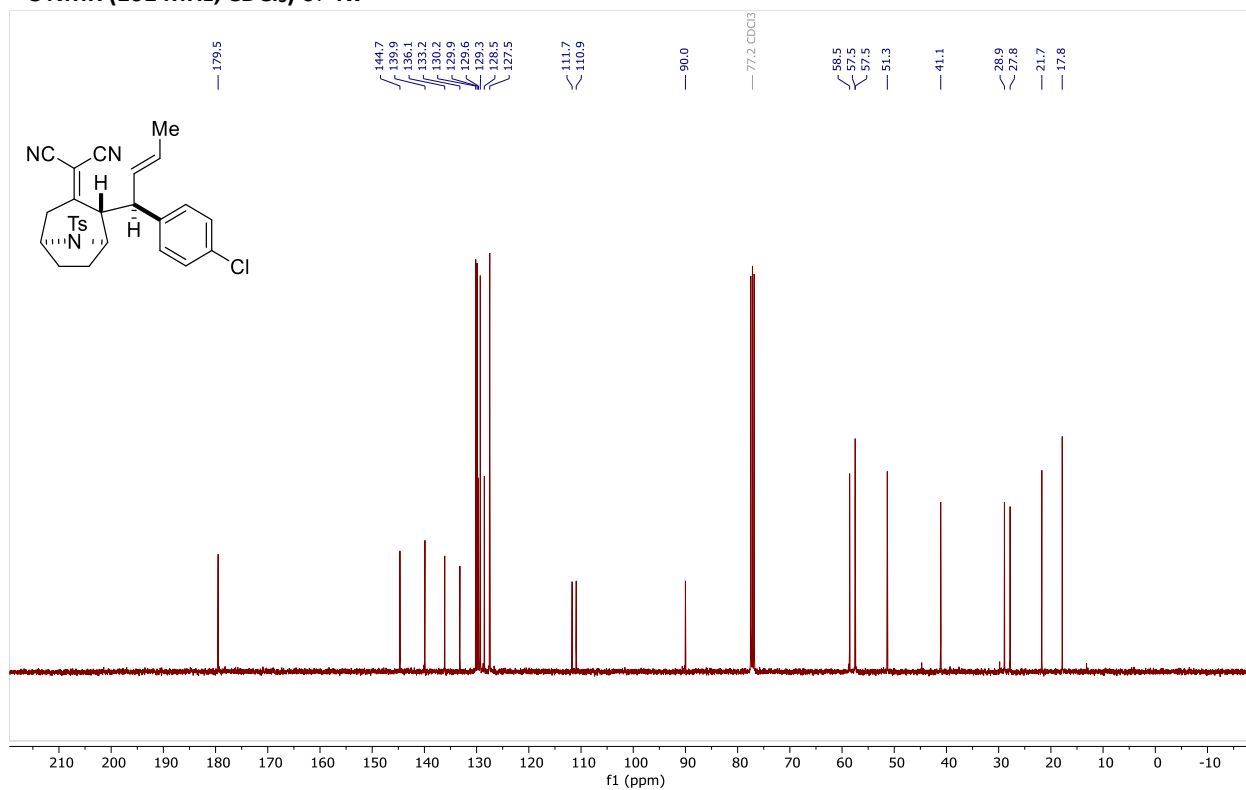

<sup>1</sup>H NMR (400 MHz, CDCl<sub>3</sub>) of 4x

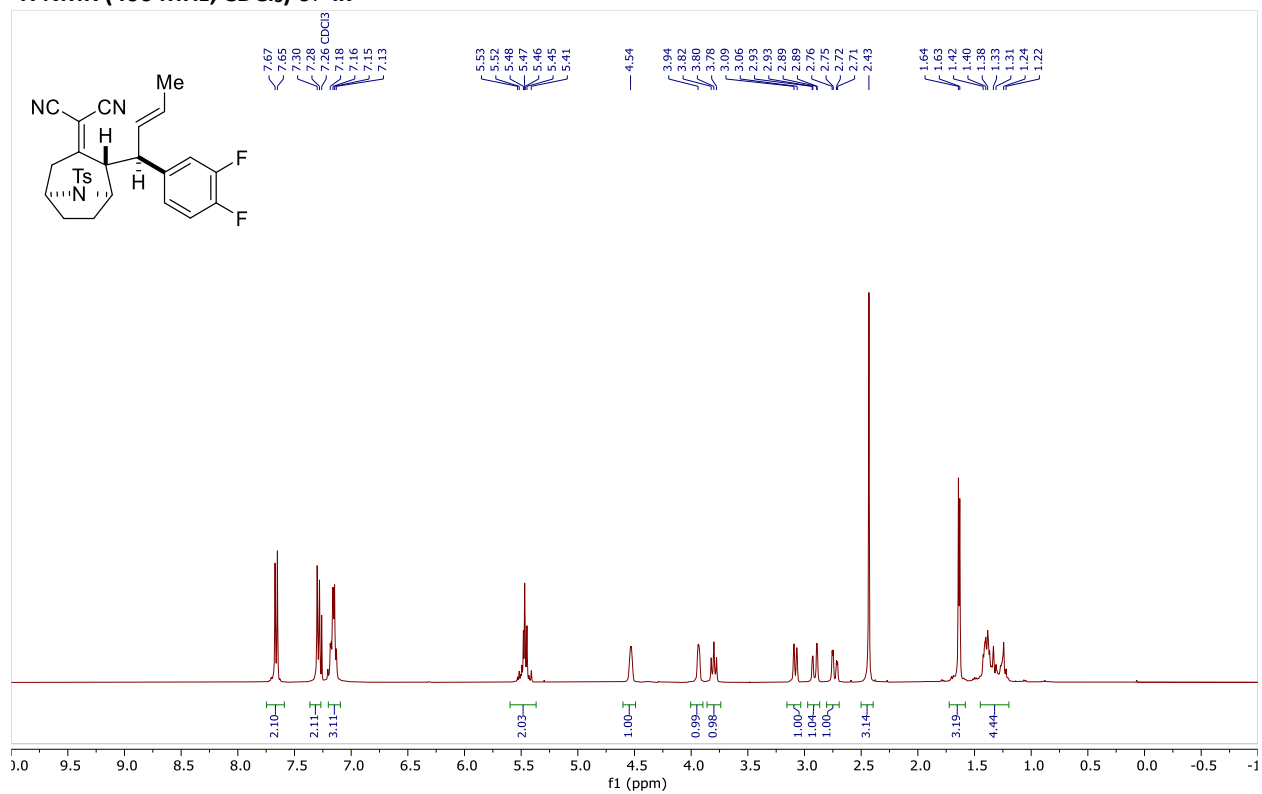

<sup>13</sup>C NMR (101 MHz, CDCl<sub>3</sub>) of 4x

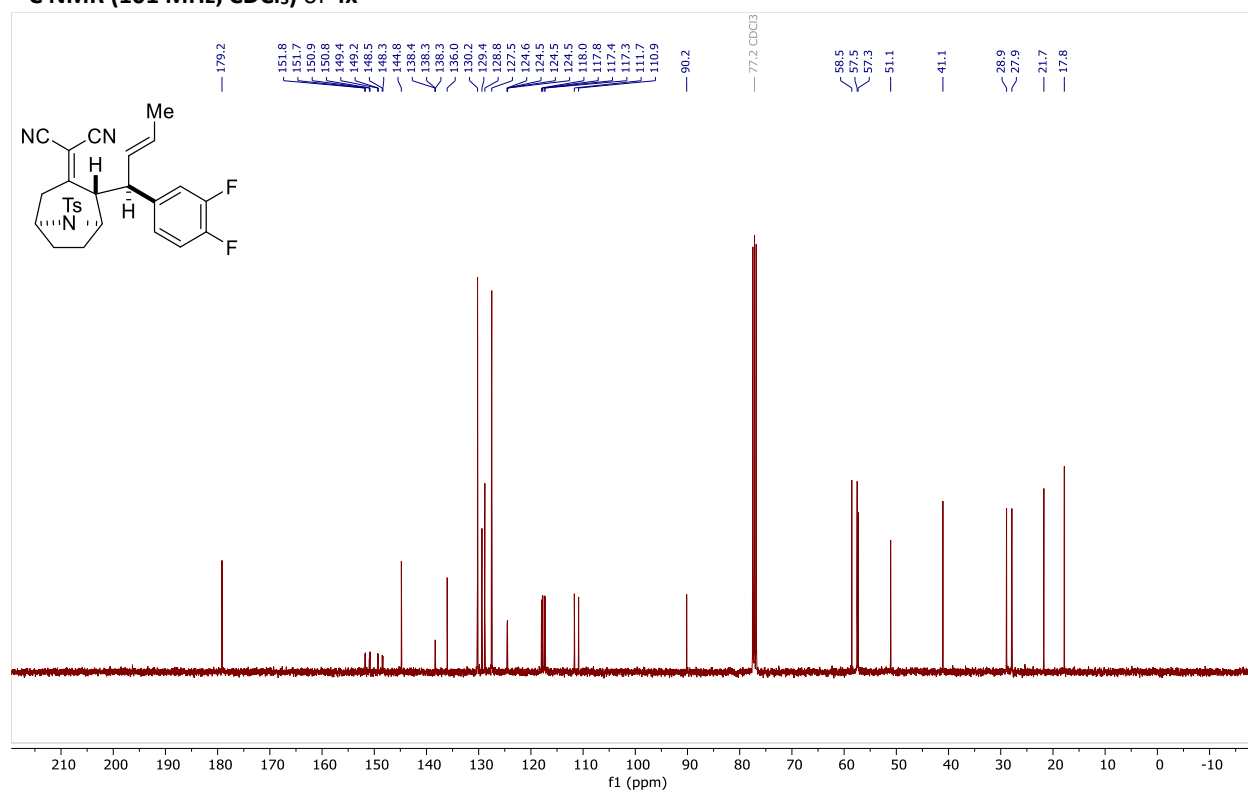



**<sup>19</sup>F NMR (377 MHz, CDCl<sub>3</sub>) of 4x**

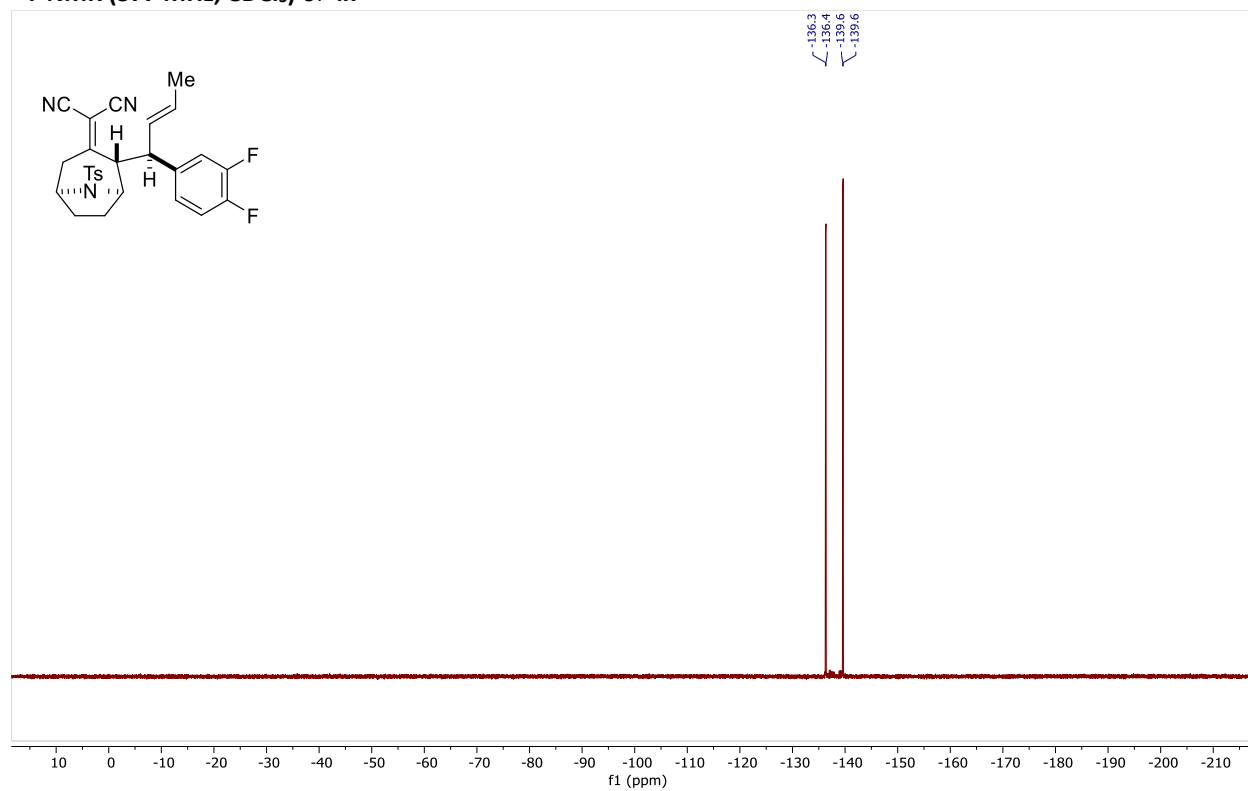

**<sup>1</sup>H NMR (600 MHz, CDCl<sub>3</sub>) of 4y**

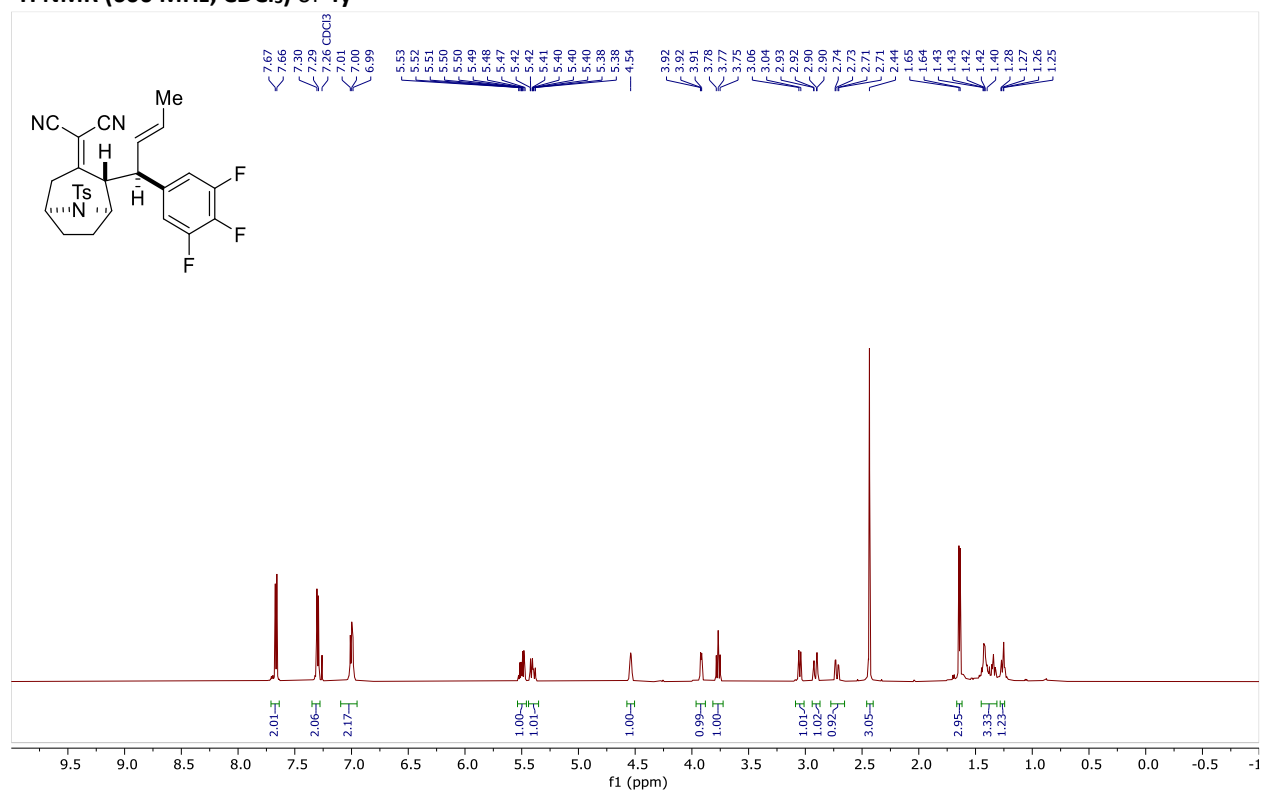

**<sup>13</sup>C NMR (151 MHz, CDCl<sub>3</sub>) of 4y**

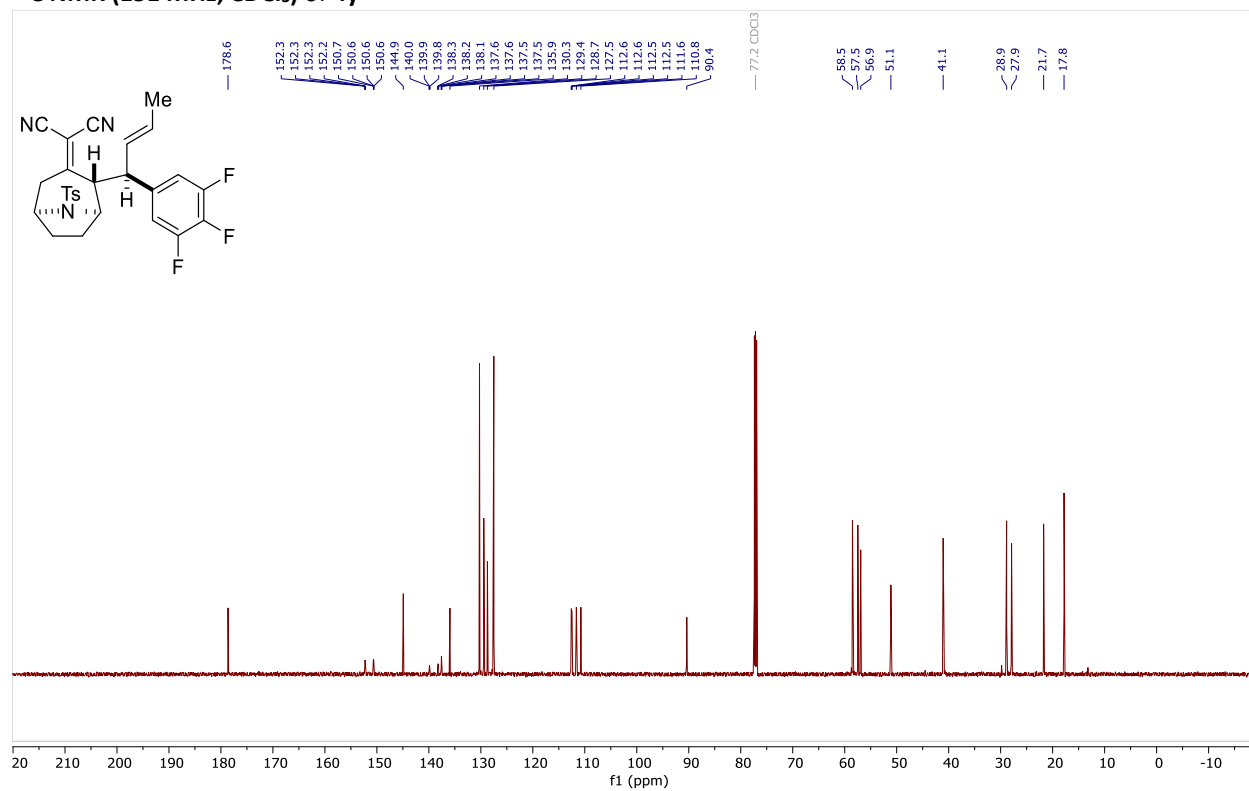

**<sup>19</sup>F NMR (377 MHz, CDCl<sub>3</sub>) of 4y**

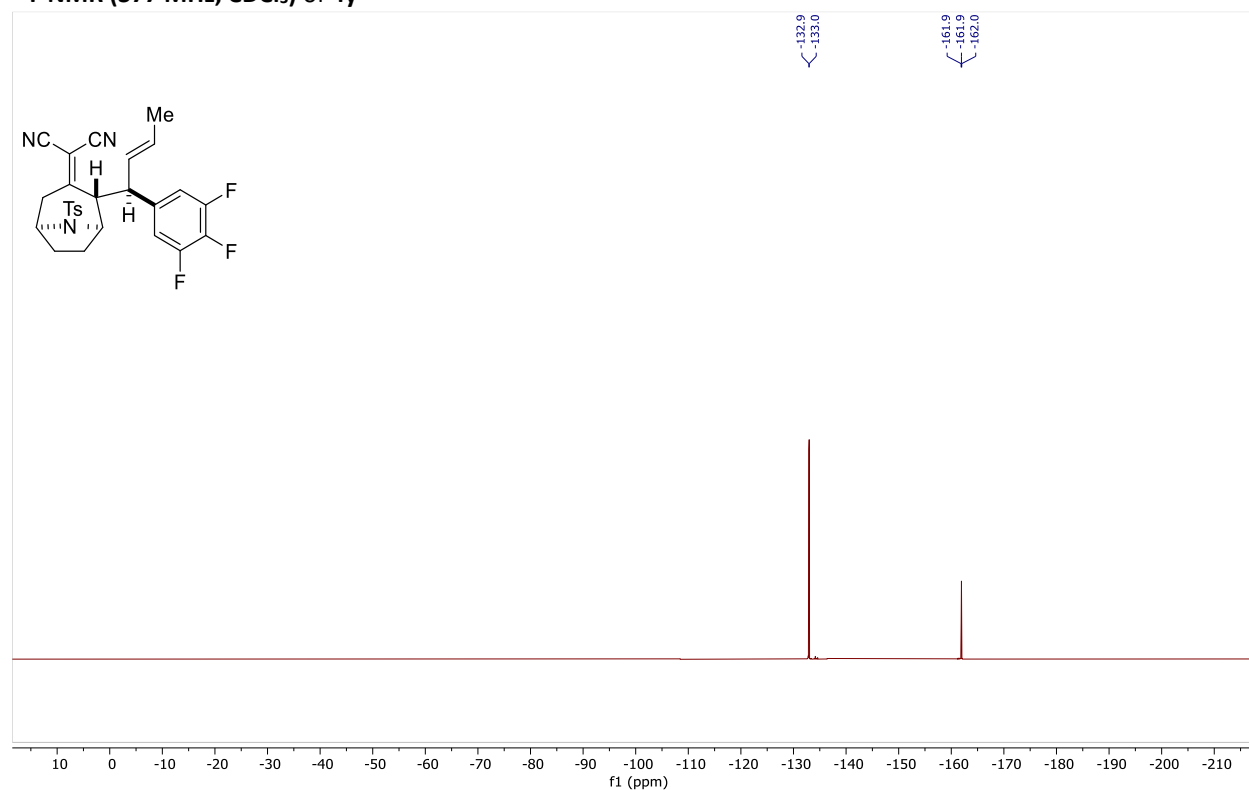

**<sup>1</sup>H NMR (400 MHz, CDCl<sub>3</sub>) of 4z**

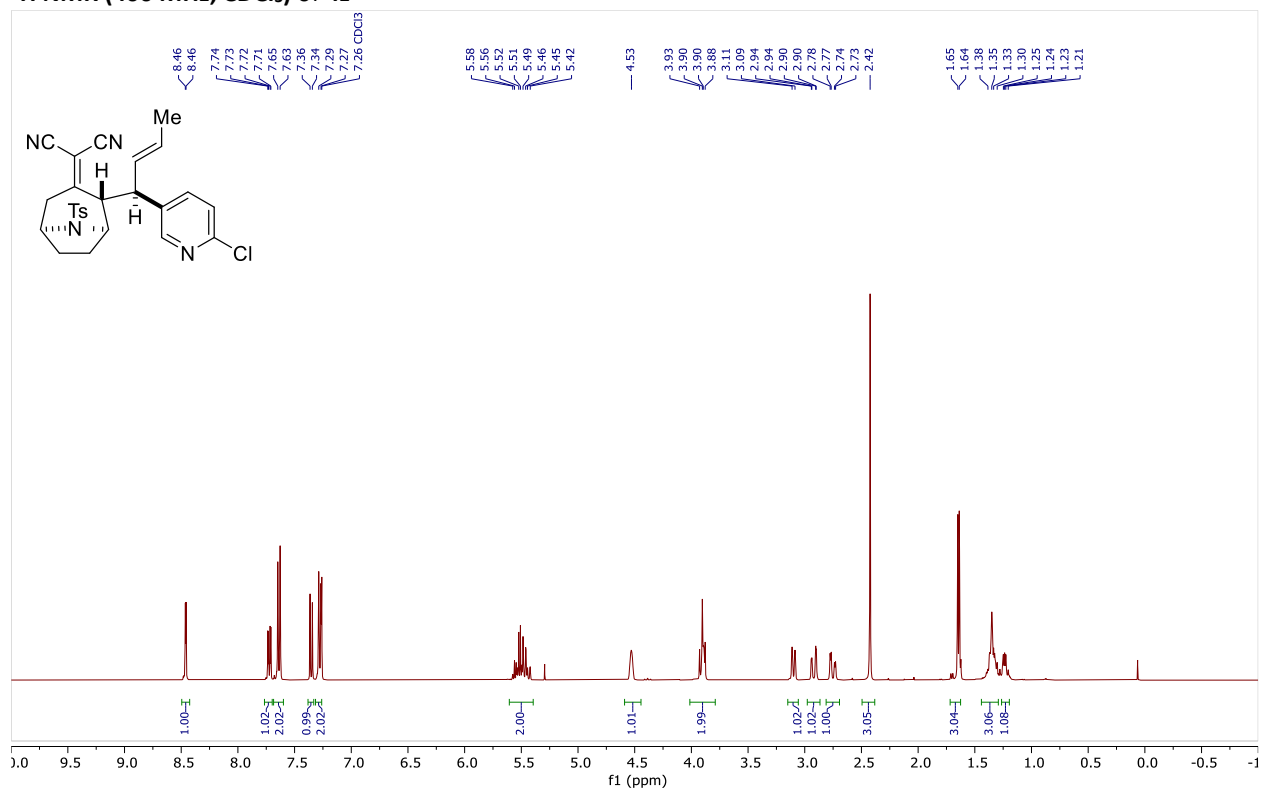

**<sup>13</sup>C NMR (101 MHz, CDCl<sub>3</sub>) of 4z**

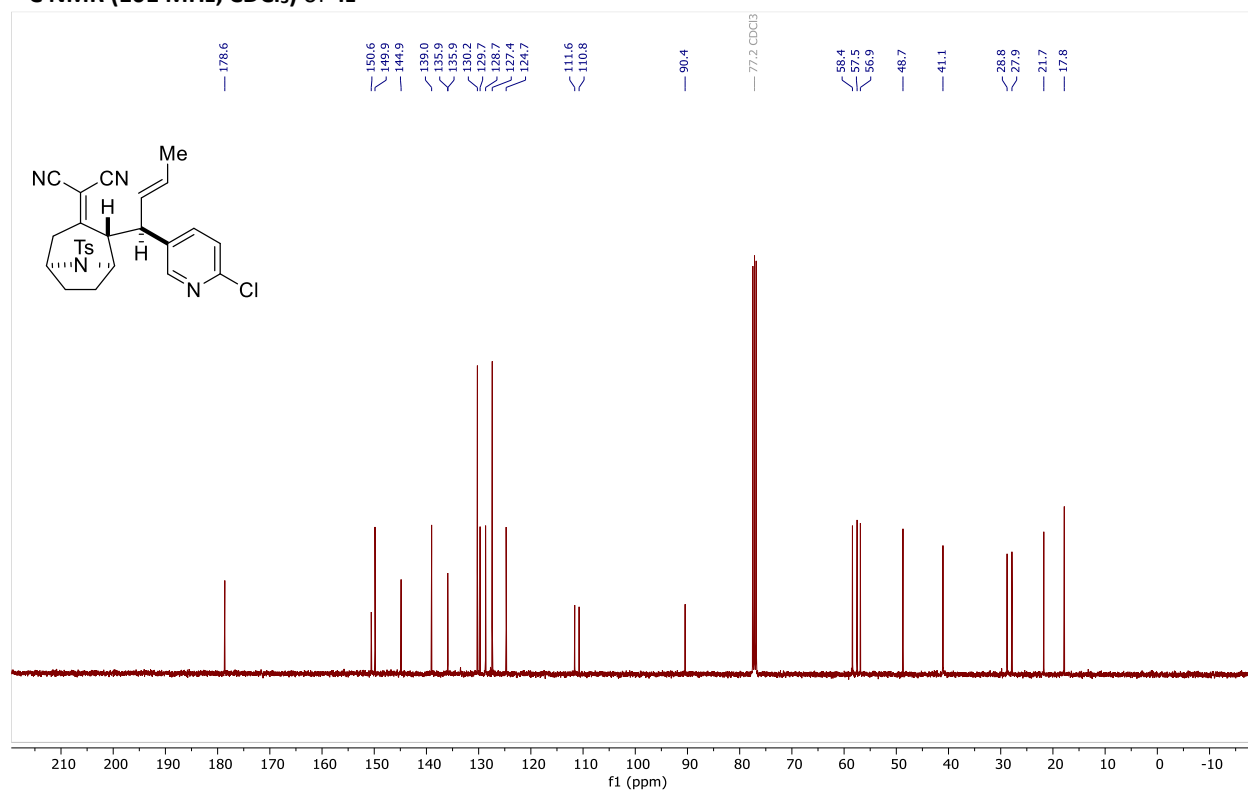

**<sup>1</sup>H NMR (400 MHz, CDCl<sub>3</sub>) of 4aa**

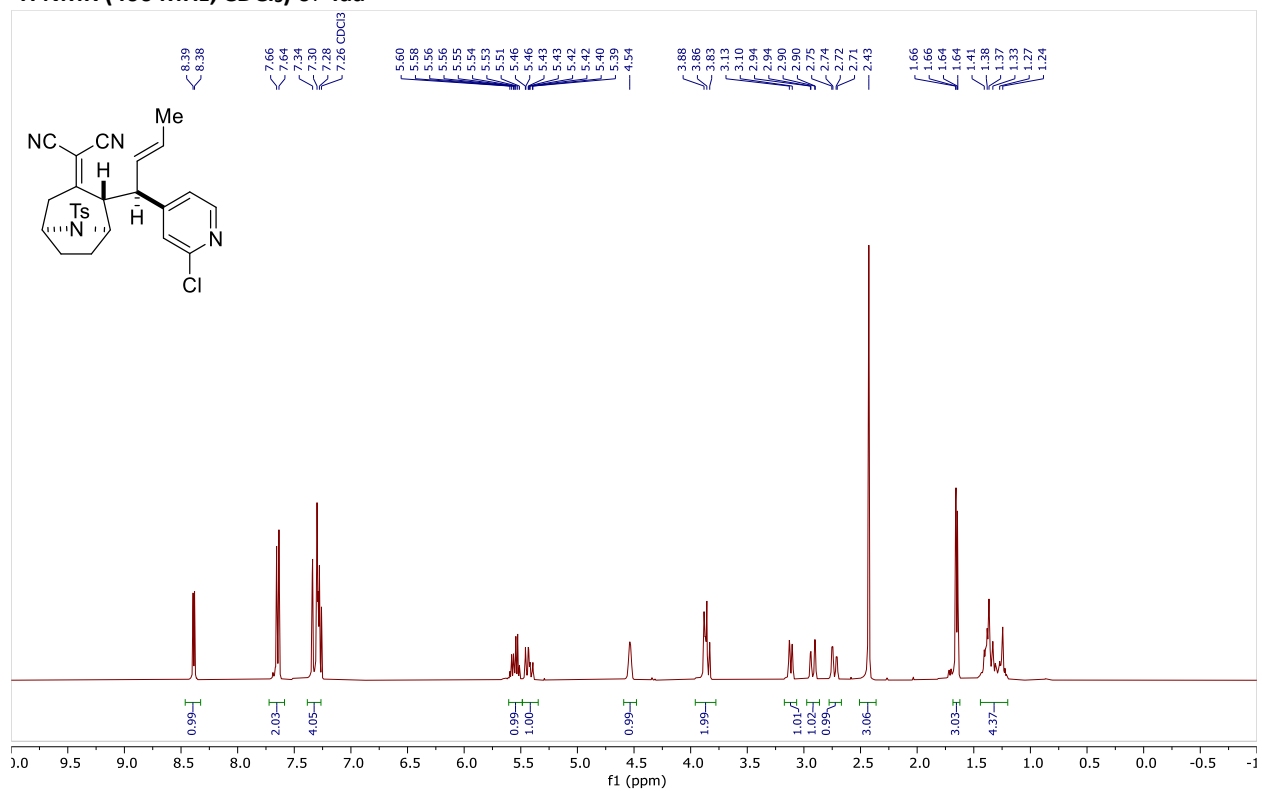

**<sup>13</sup>C NMR (101 MHz, CDCl<sub>3</sub>) of 4aa**

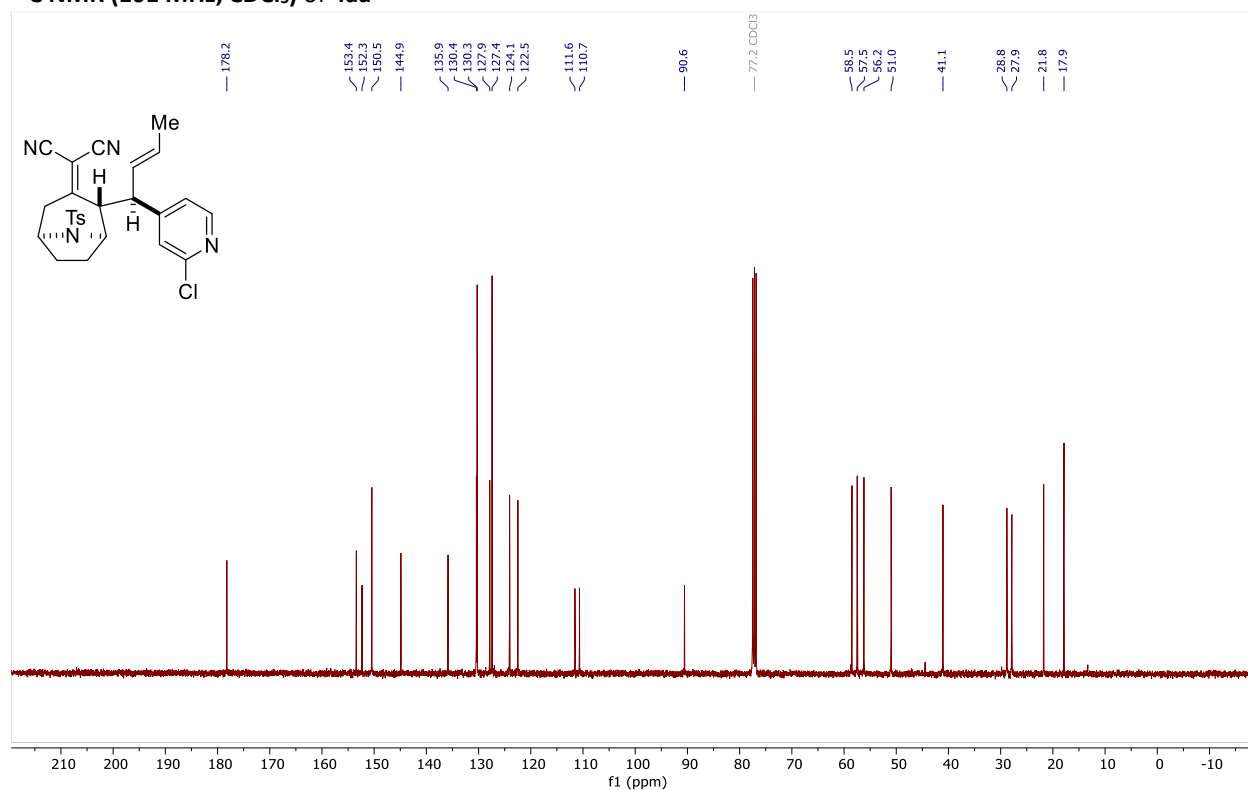

### <sup>1</sup>H NMR (400 MHz, CDCl<sub>3</sub>) of 4bb

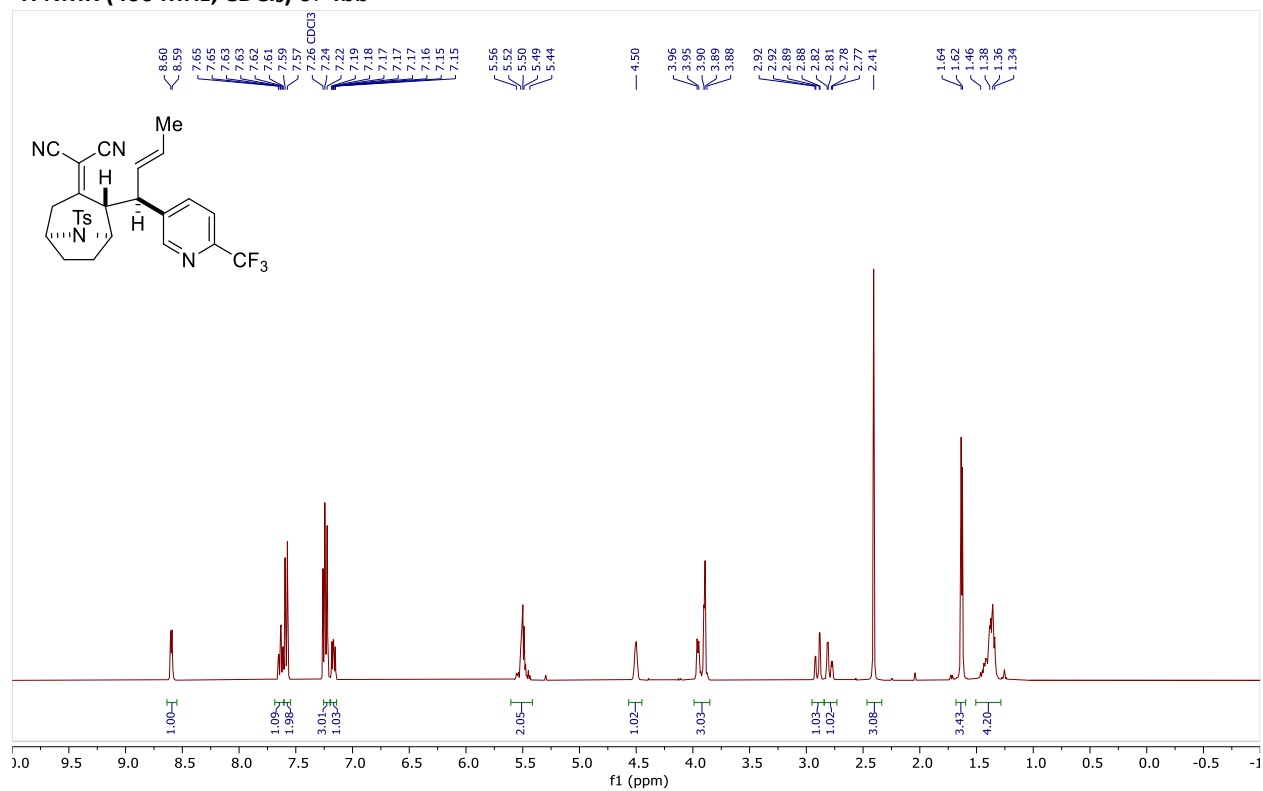

### <sup>13</sup>C NMR (101 MHz, CDCl<sub>3</sub>) of 4bb

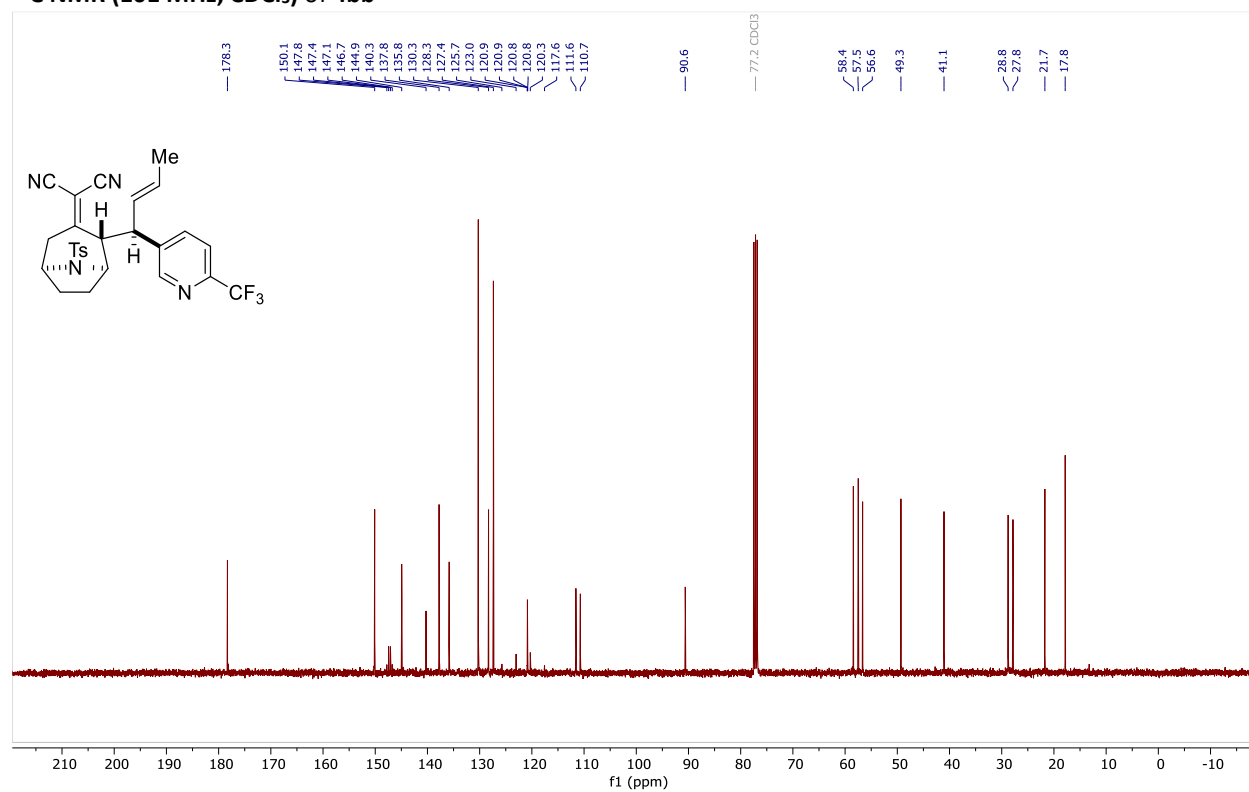

**<sup>19</sup>F NMR (377 MHz, CDCl<sub>3</sub>) of 4bb**

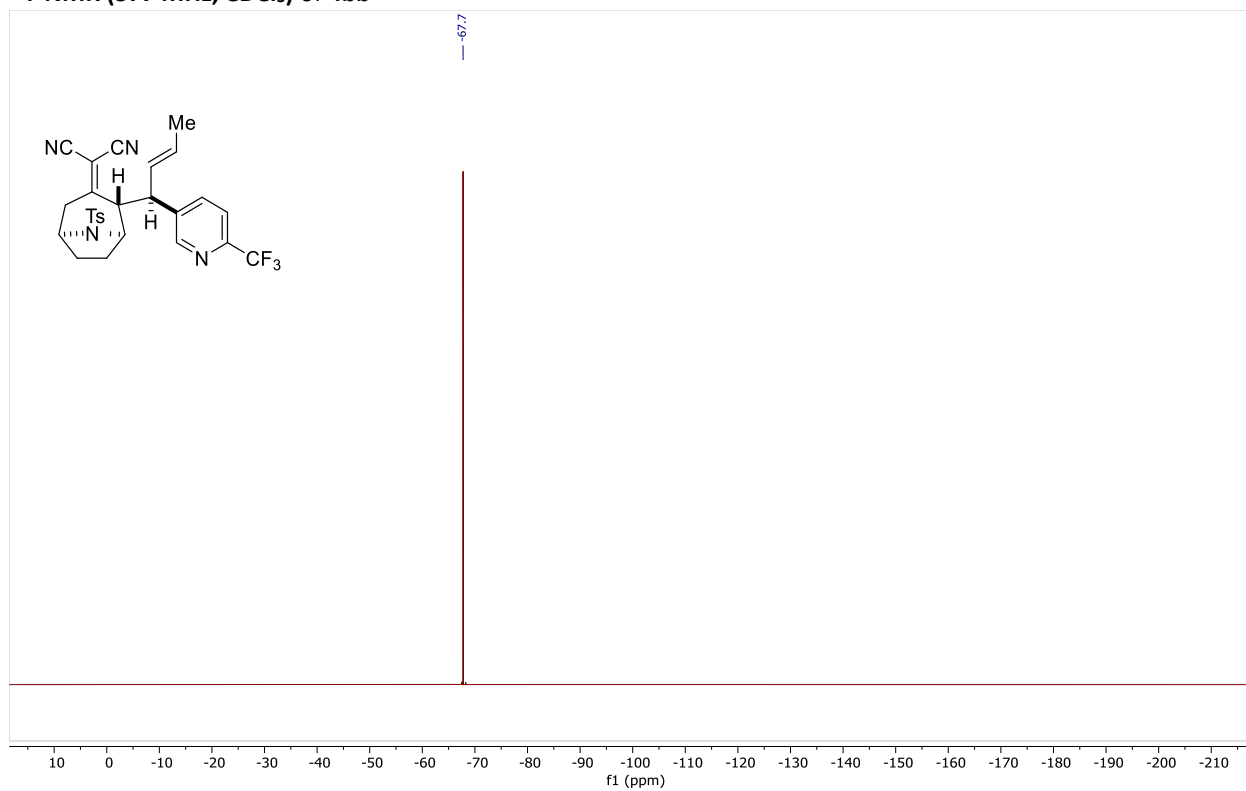

**<sup>1</sup>H NMR (400 MHz, CDCl<sub>3</sub>) of 4cc**

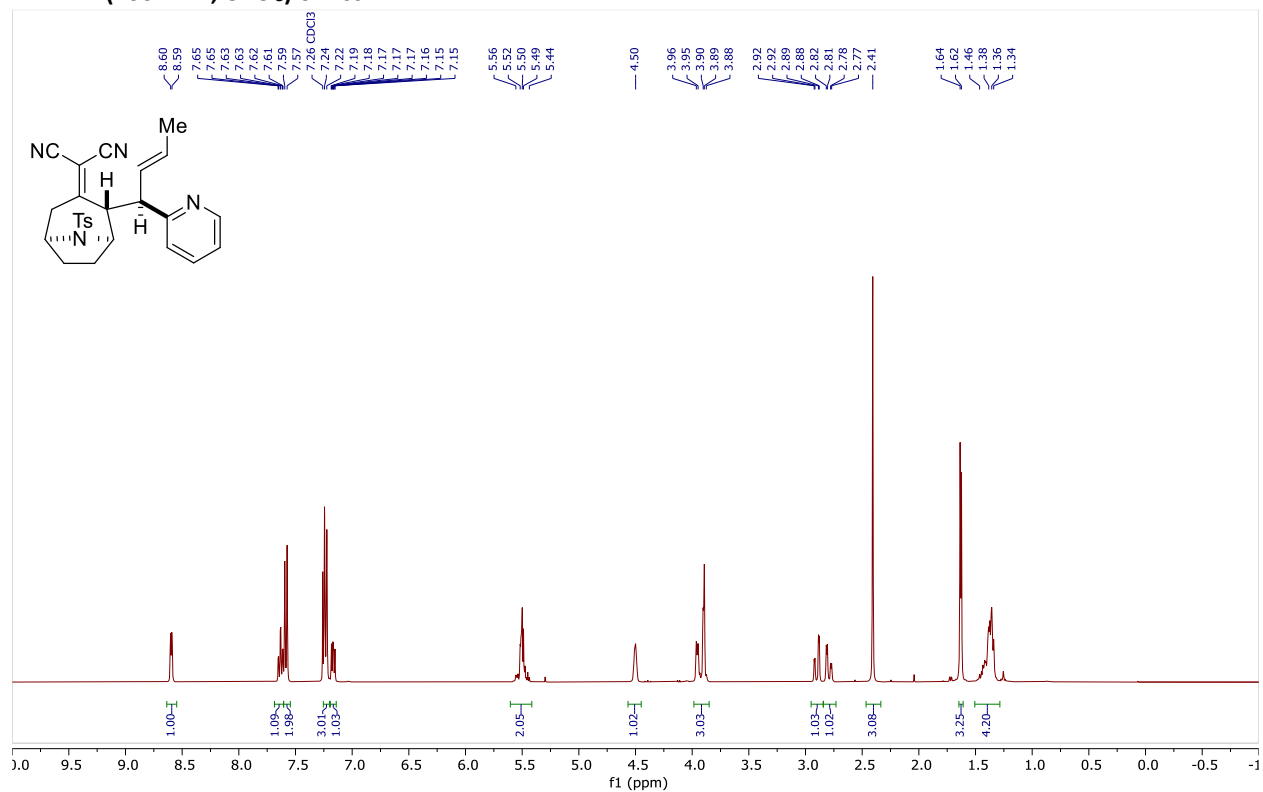

**<sup>13</sup>C NMR (101 MHz, CDCl<sub>3</sub>) of 4cc**

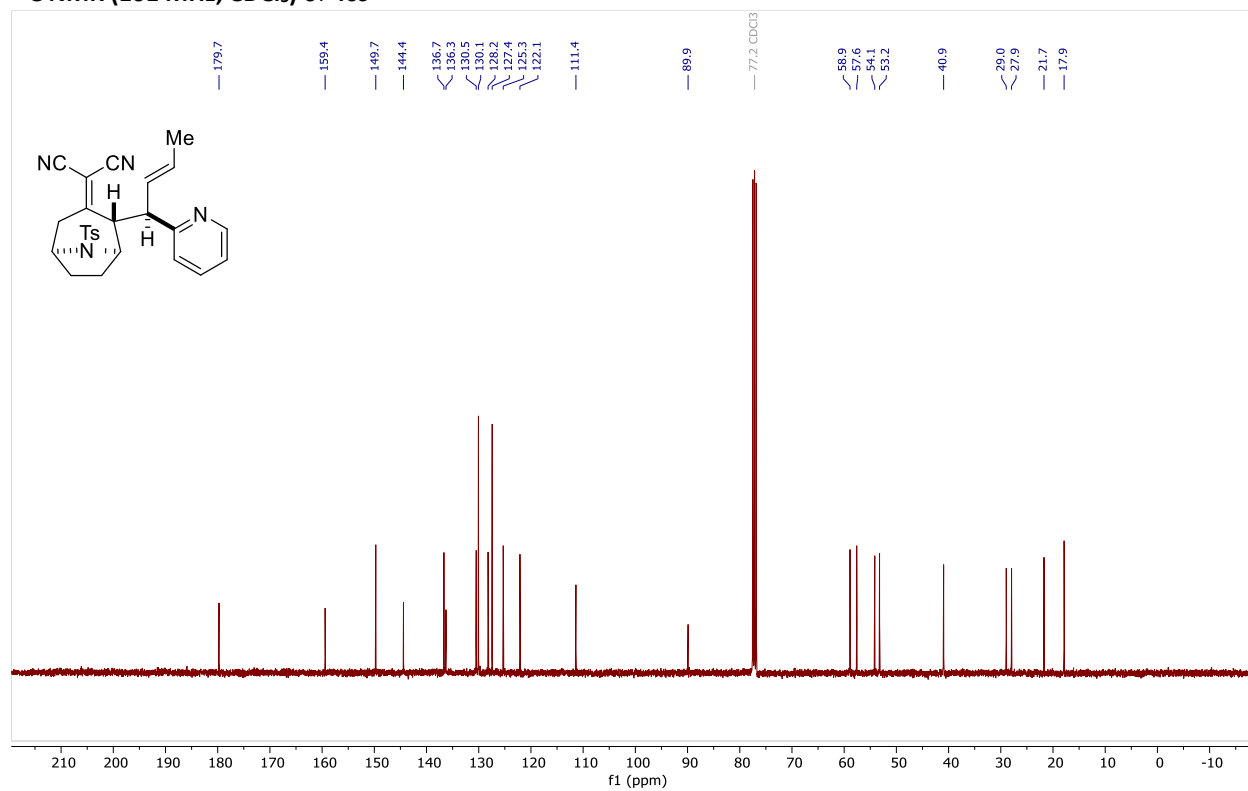

**<sup>1</sup>H NMR (400 MHz, DMSO-d<sub>6</sub>, 354 K) of 4dd**

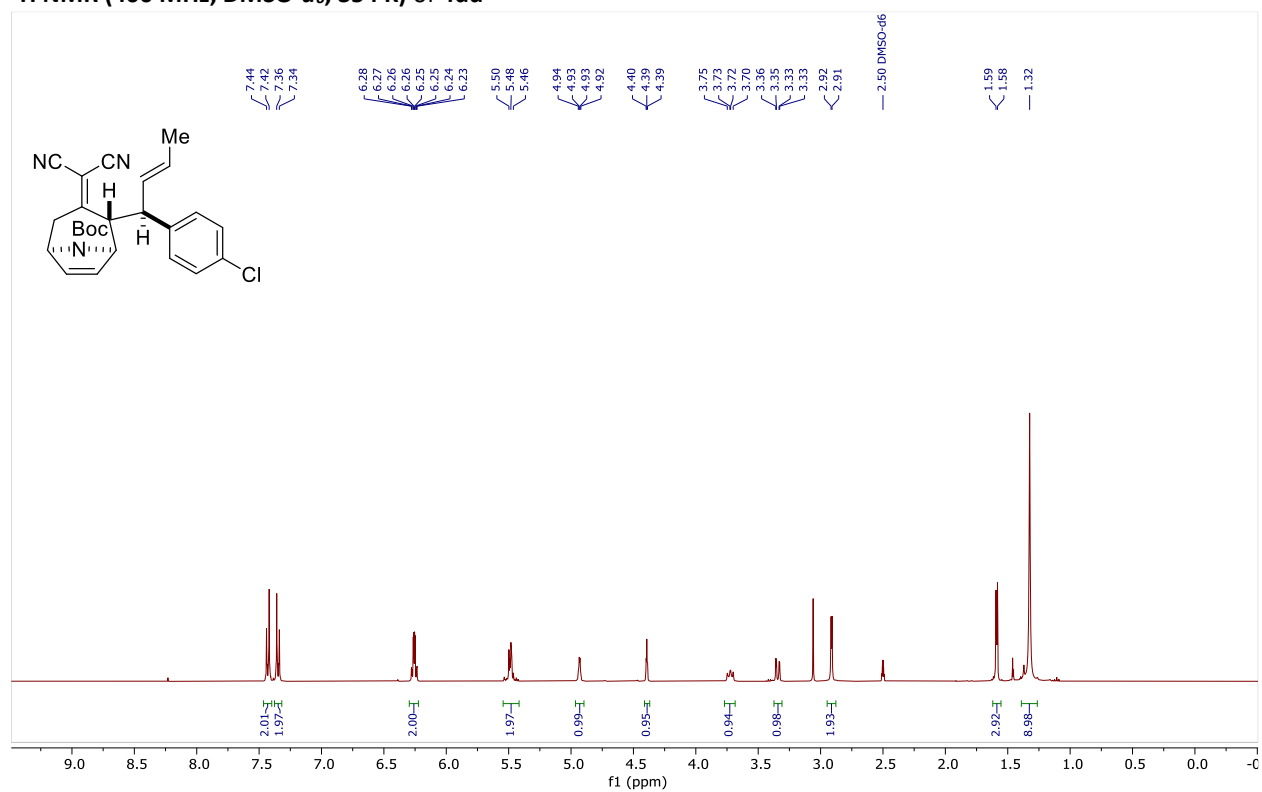

**<sup>13</sup>C NMR (101 MHz, DMSO-d<sub>6</sub>, 354 K) of 4dd**

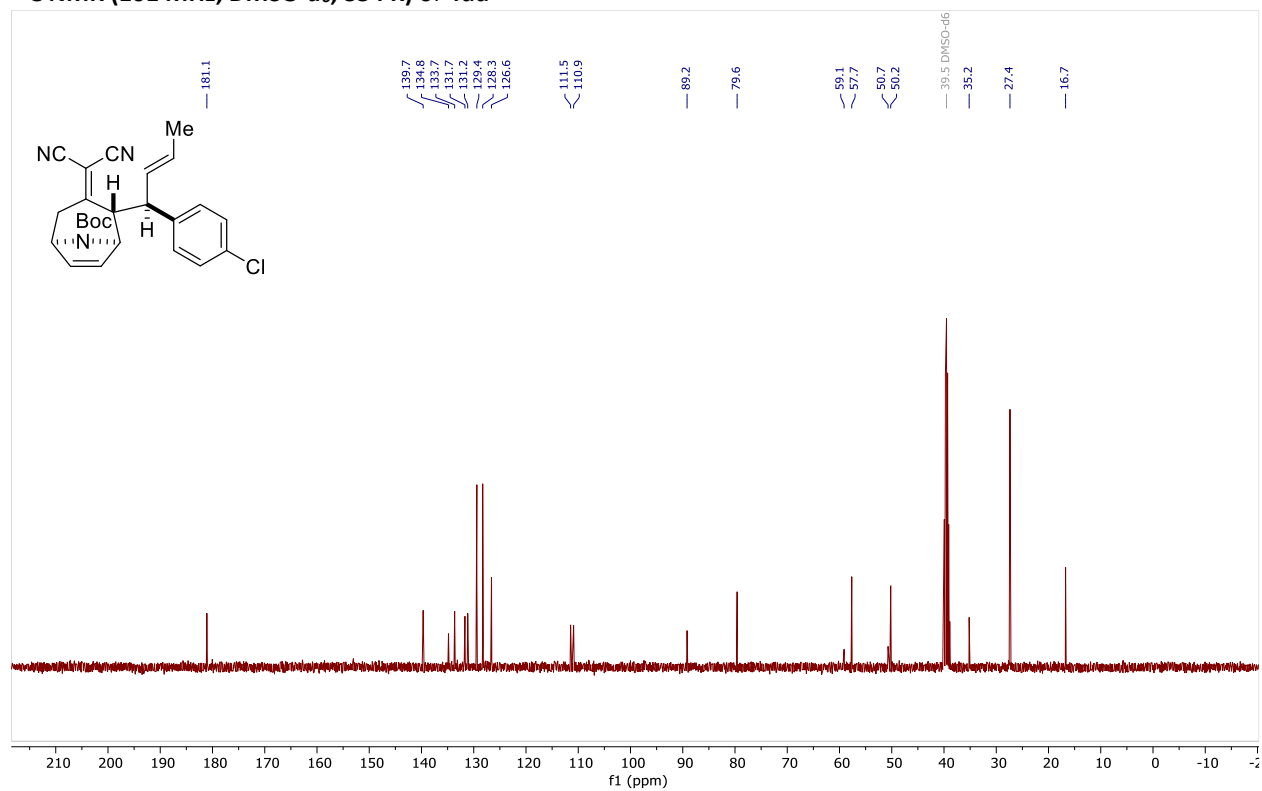

**<sup>1</sup>H NMR (600 MHz, CDCl<sub>3</sub>) of 4ee**

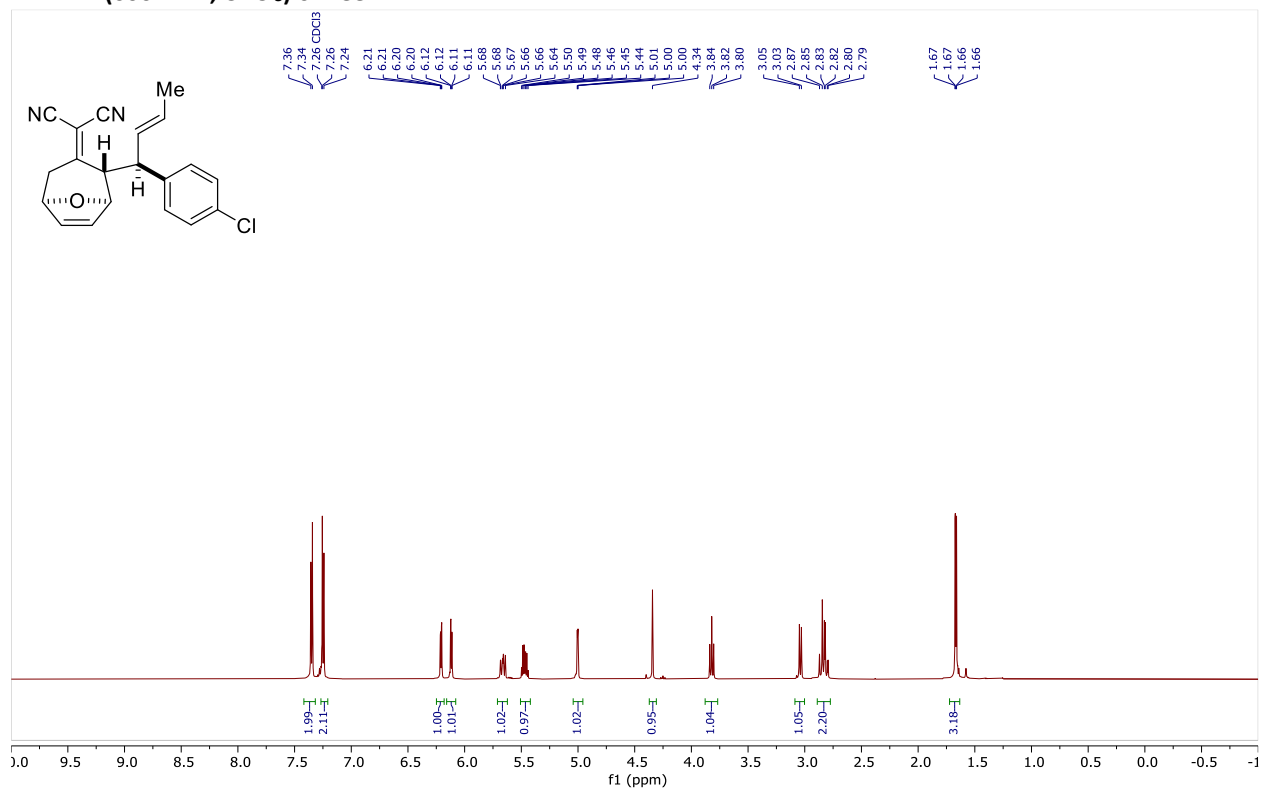



**<sup>13</sup>C NMR (101 MHz, CDCl<sub>3</sub>) of 4ee**

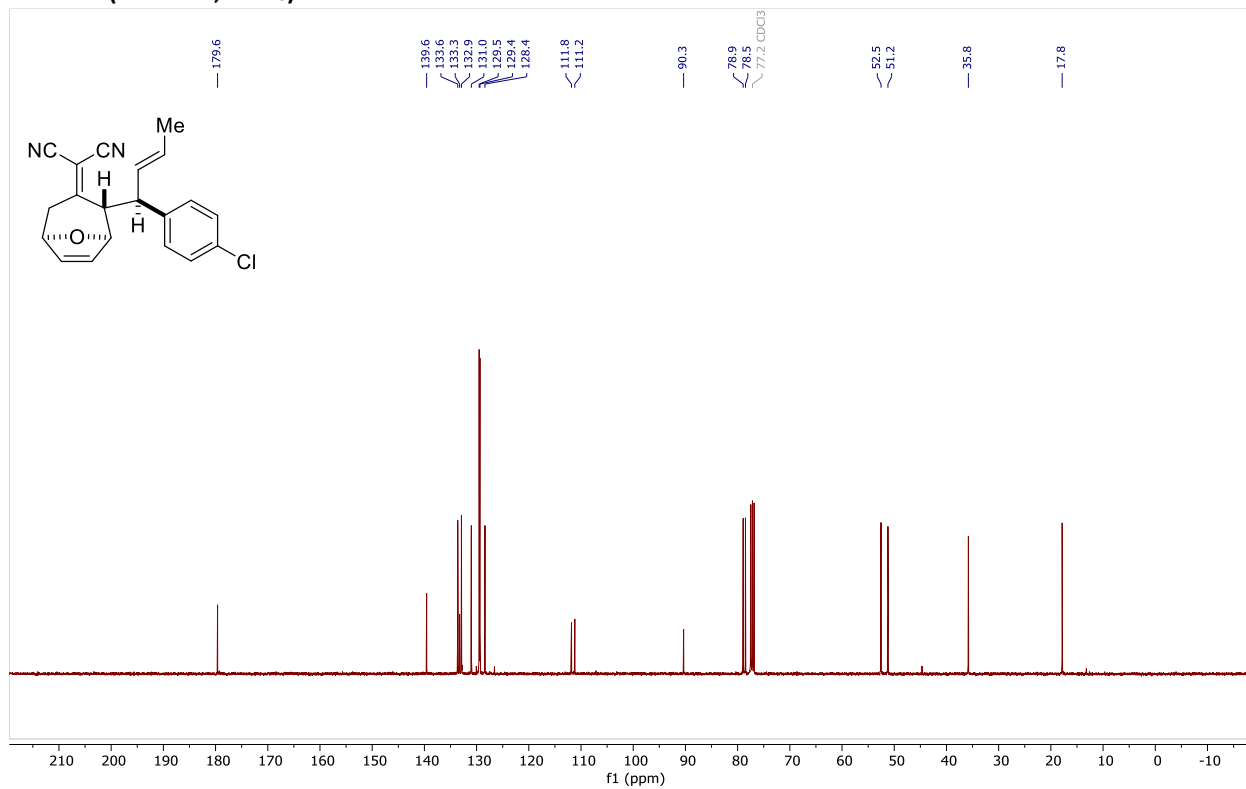

**<sup>1</sup>H NMR (400 MHz, CDCl<sub>3</sub>) of 5a**

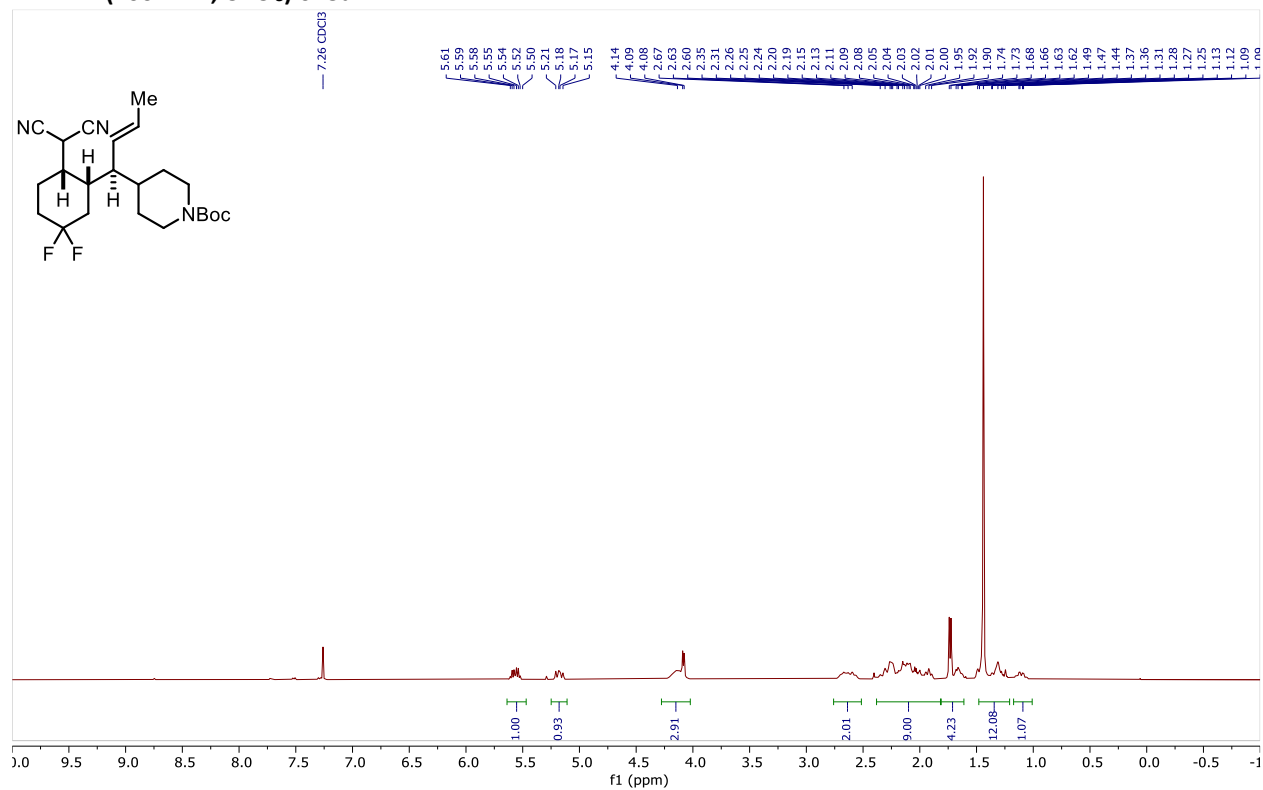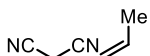

<sup>13</sup>C NMR (101 MHz, CDCl<sub>3</sub>) of 5a

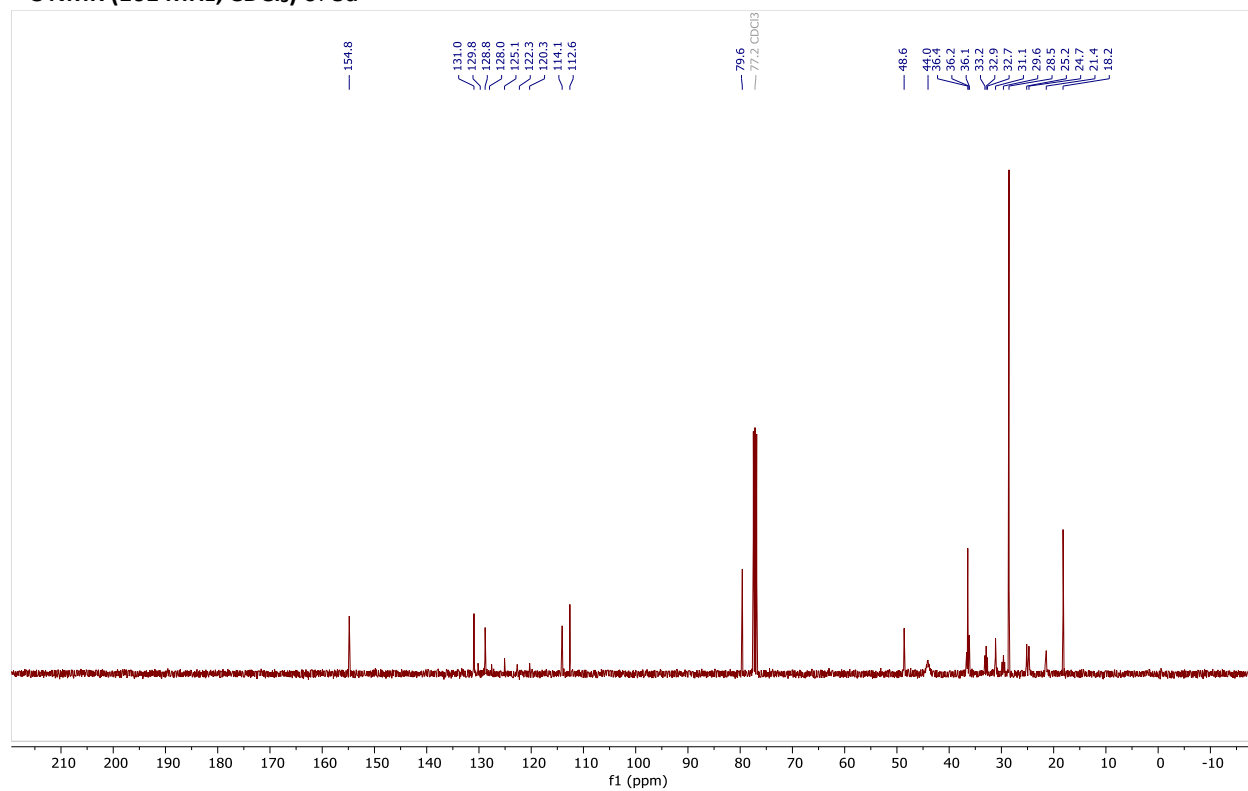

<sup>19</sup>F NMR (377 MHz, CDCl<sub>3</sub>) of 5a

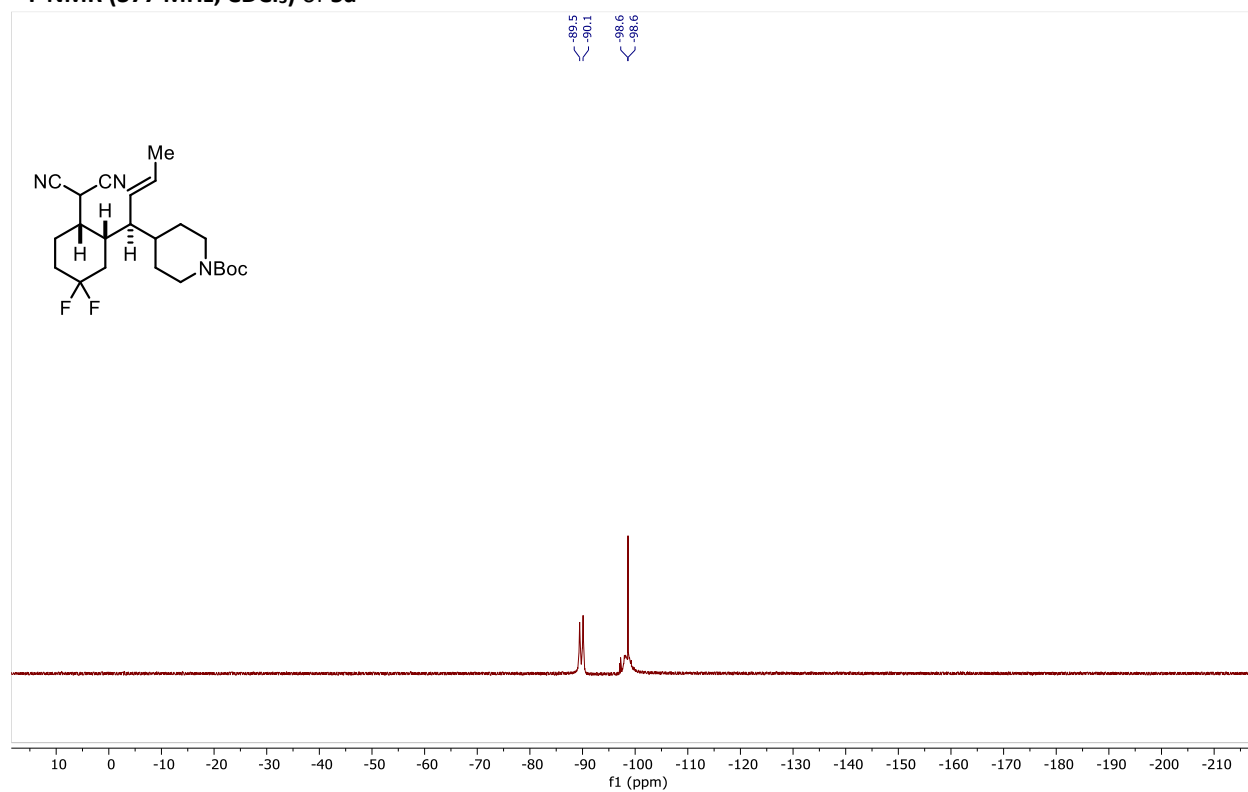

**<sup>1</sup>H NMR (400 MHz, CDCl<sub>3</sub>) of 5b**

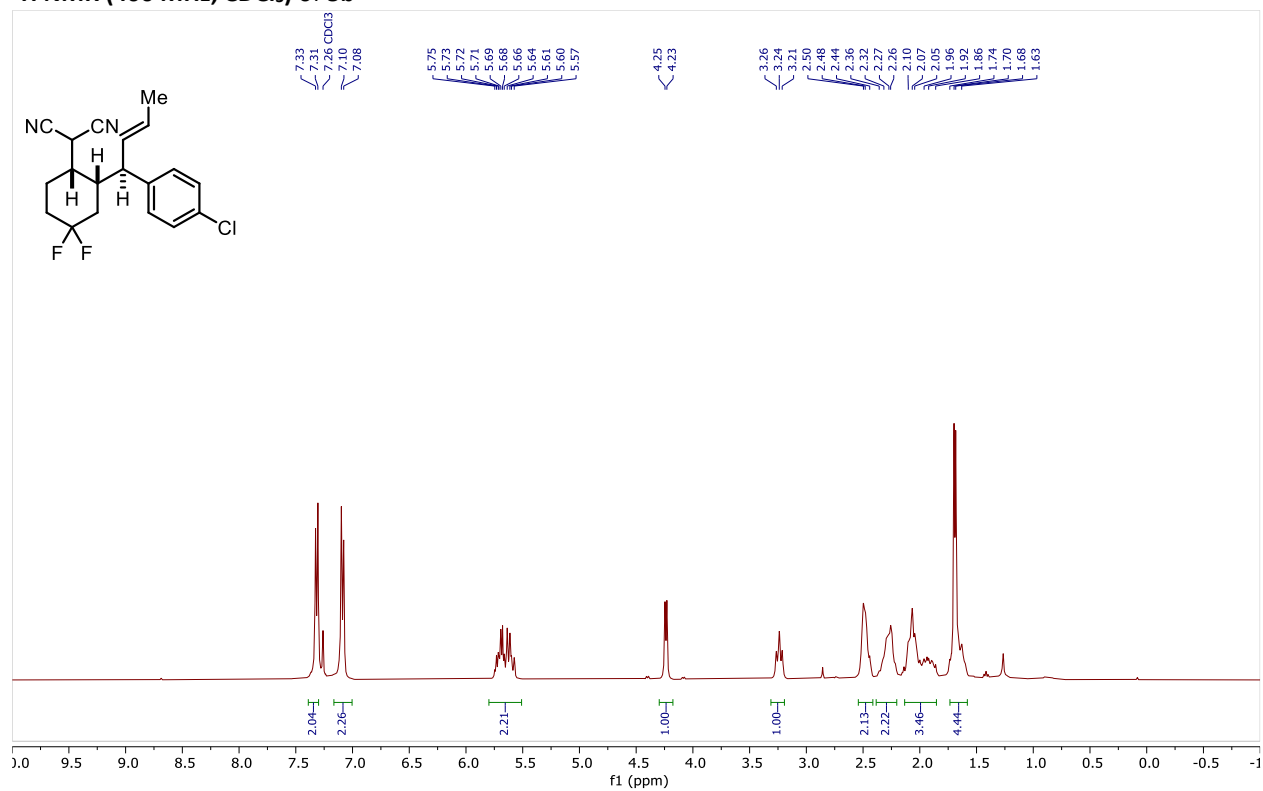

**<sup>13</sup>C NMR (101 MHz, CDCl<sub>3</sub>) of 5b**

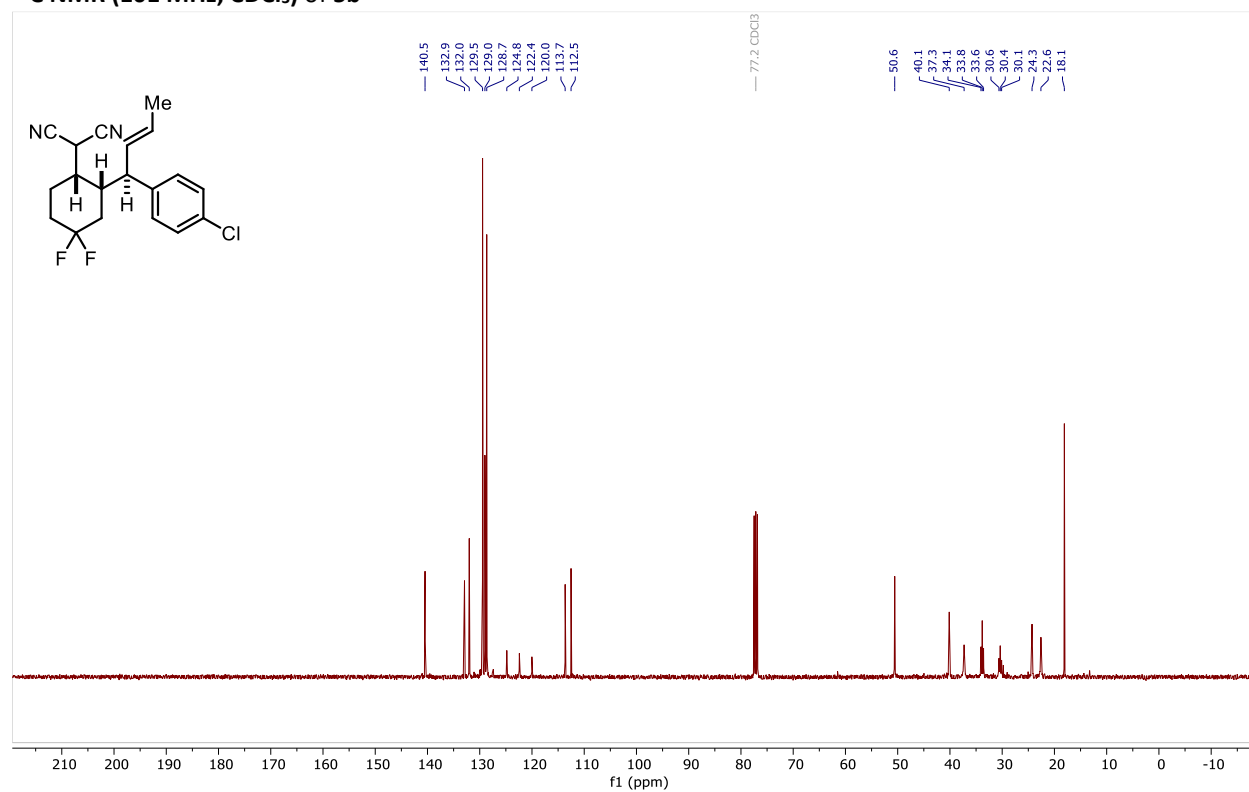

**<sup>19</sup>F NMR (377 MHz, CDCl<sub>3</sub>) of 5b**

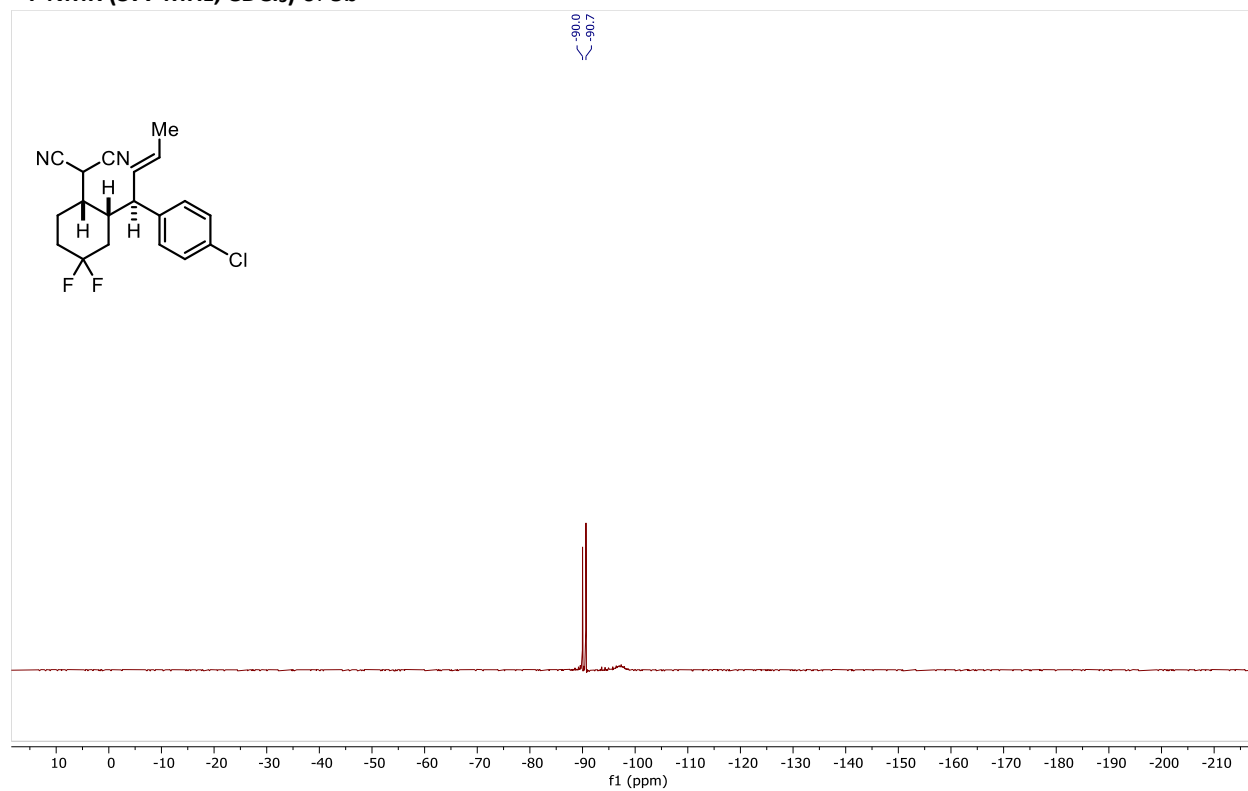

**<sup>1</sup>H NMR (400 MHz, CD<sub>3</sub>CN) of 6ff**

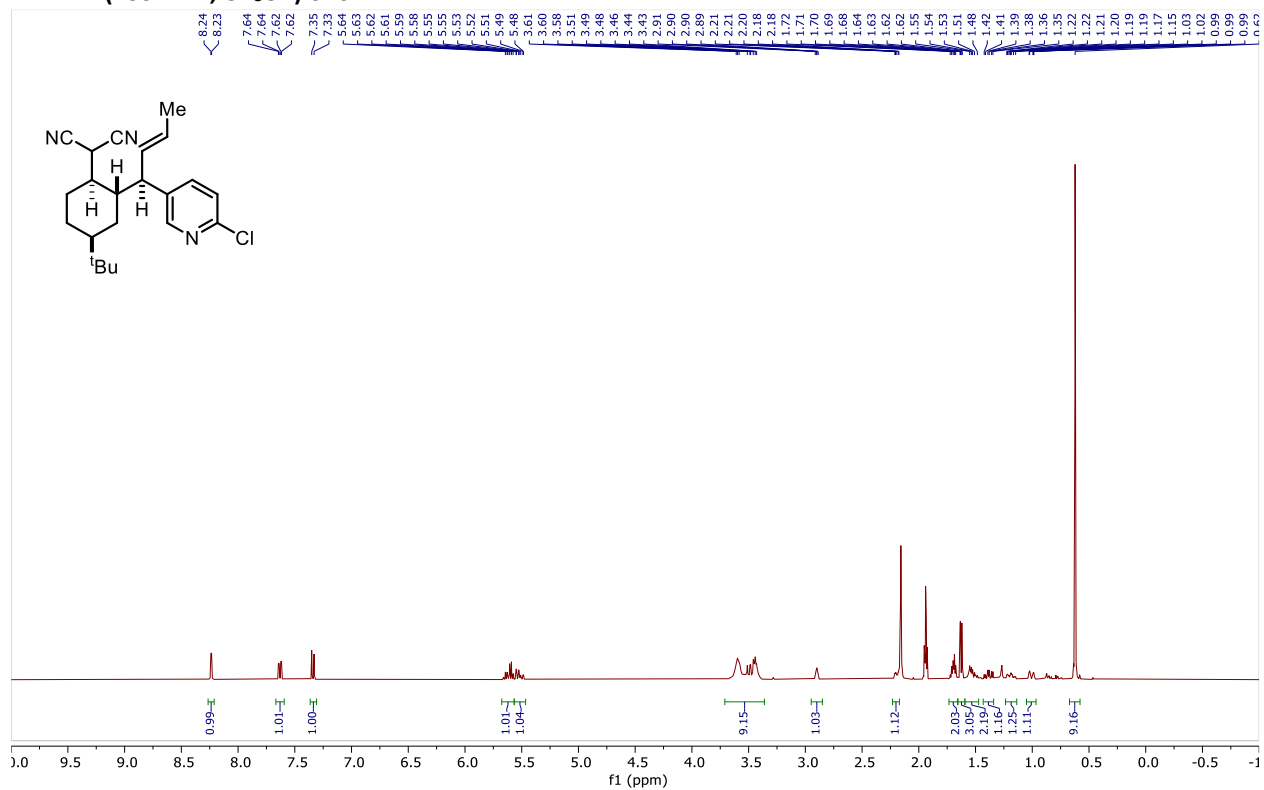

**<sup>13</sup>C NMR (101 MHz, CD<sub>3</sub>CN) of 6ff**

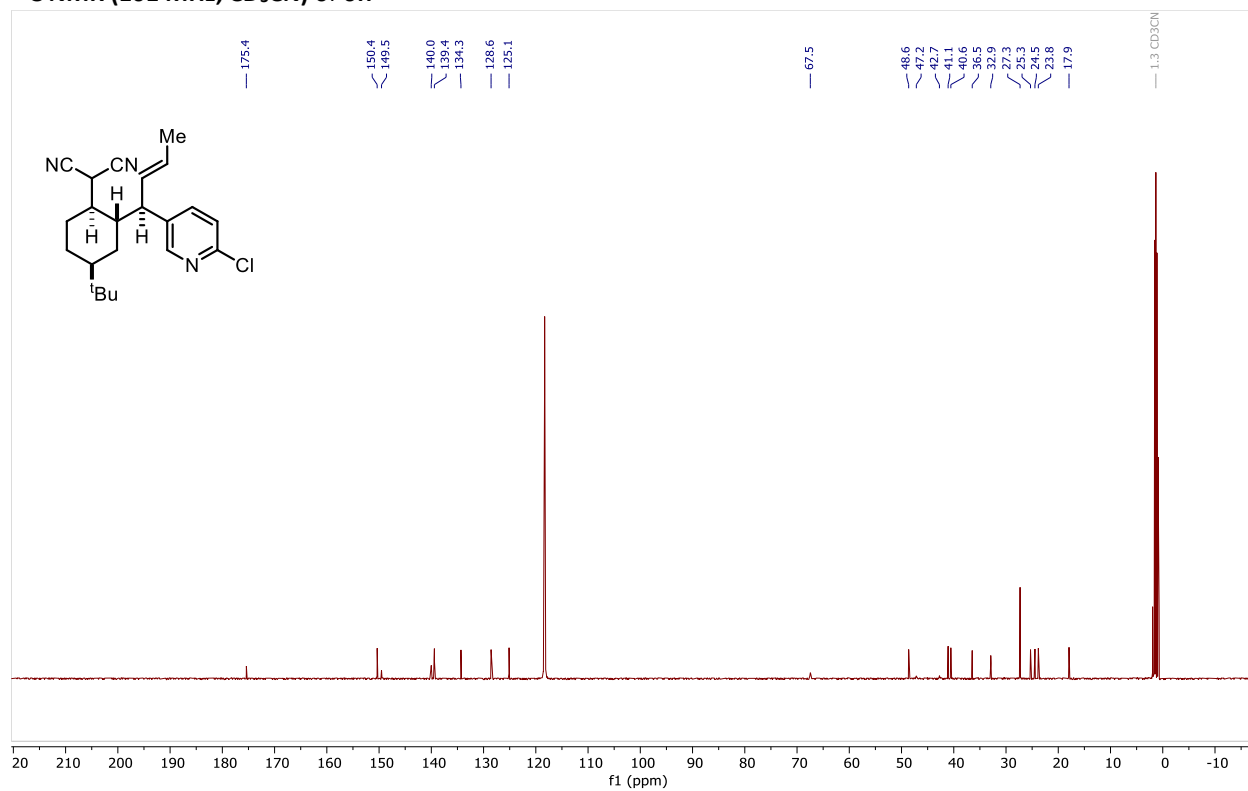

**<sup>1</sup>H NMR (400 MHz, CD<sub>3</sub>CN) of SI-3**

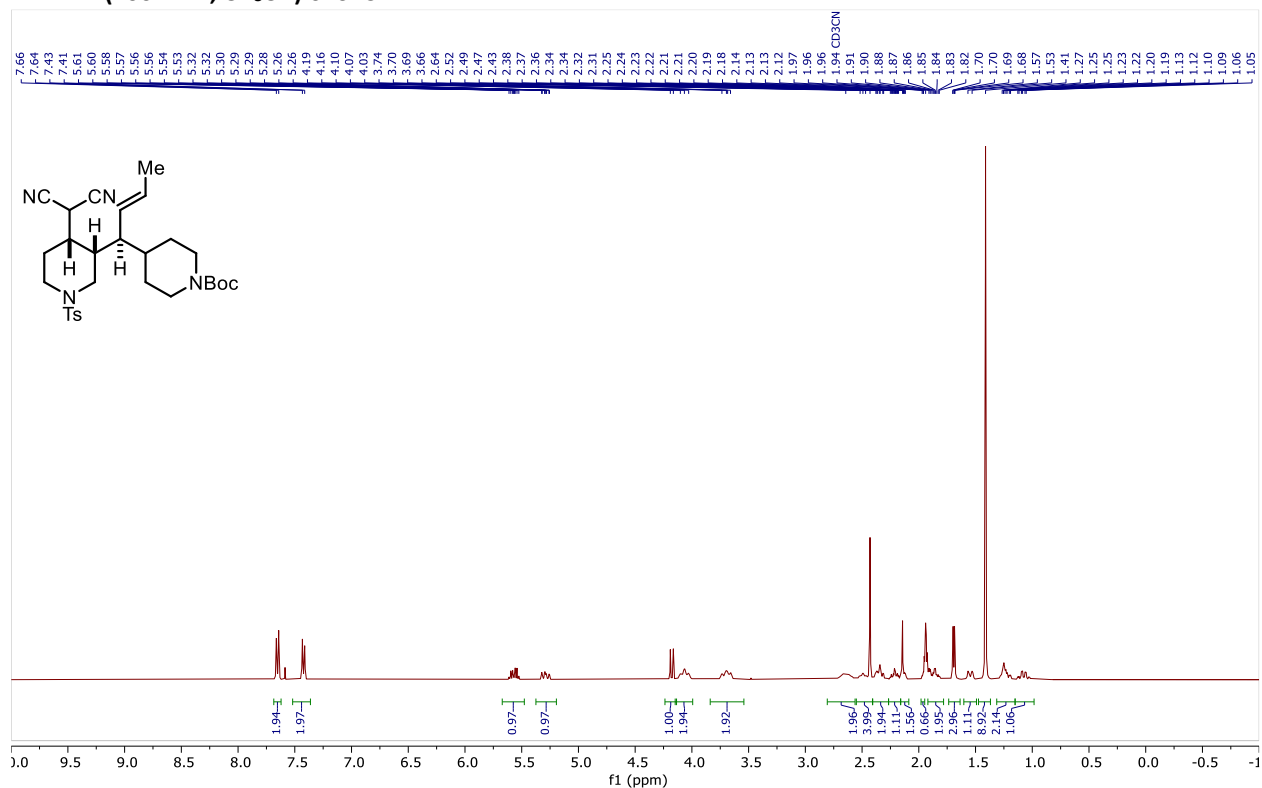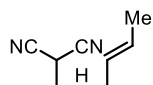

**<sup>13</sup>C NMR (101 MHz, CD<sub>3</sub>CN) of SI-3**

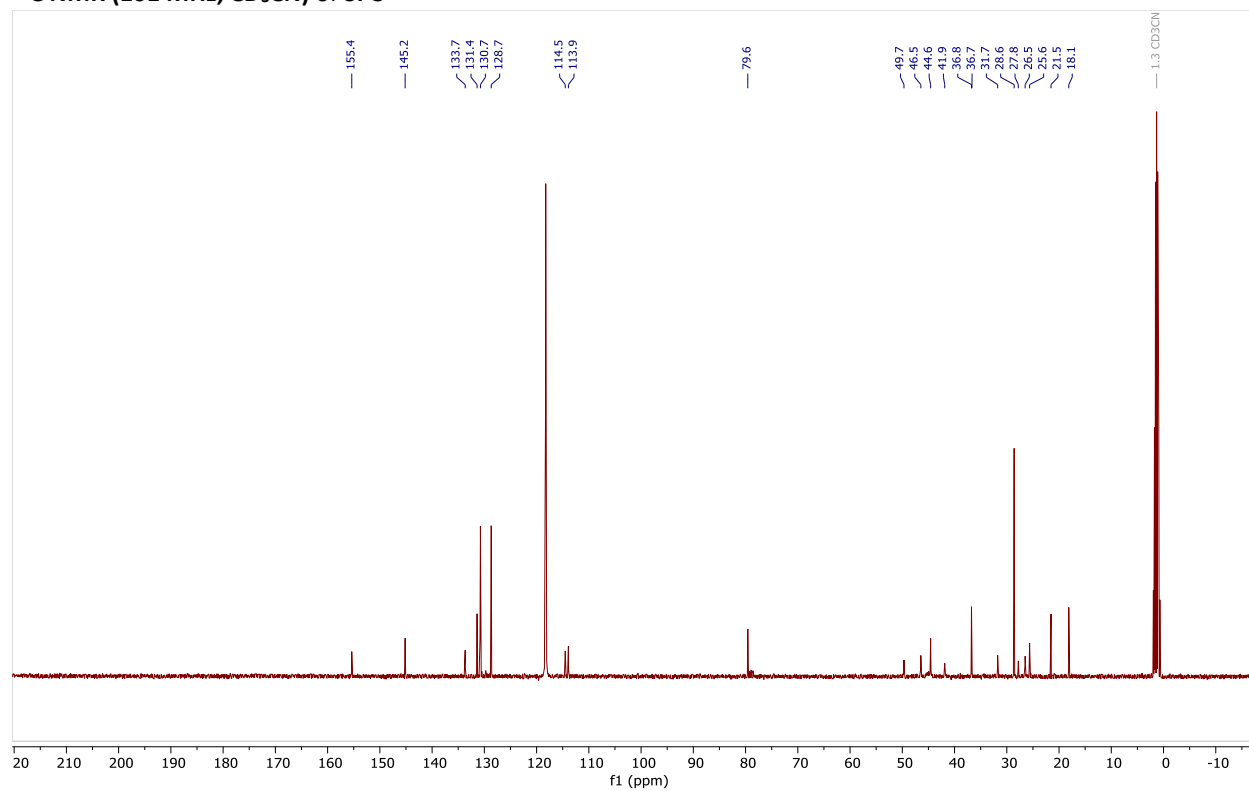

**<sup>1</sup>H NMR (400 MHz, CDCl<sub>3</sub>) of SI-4**

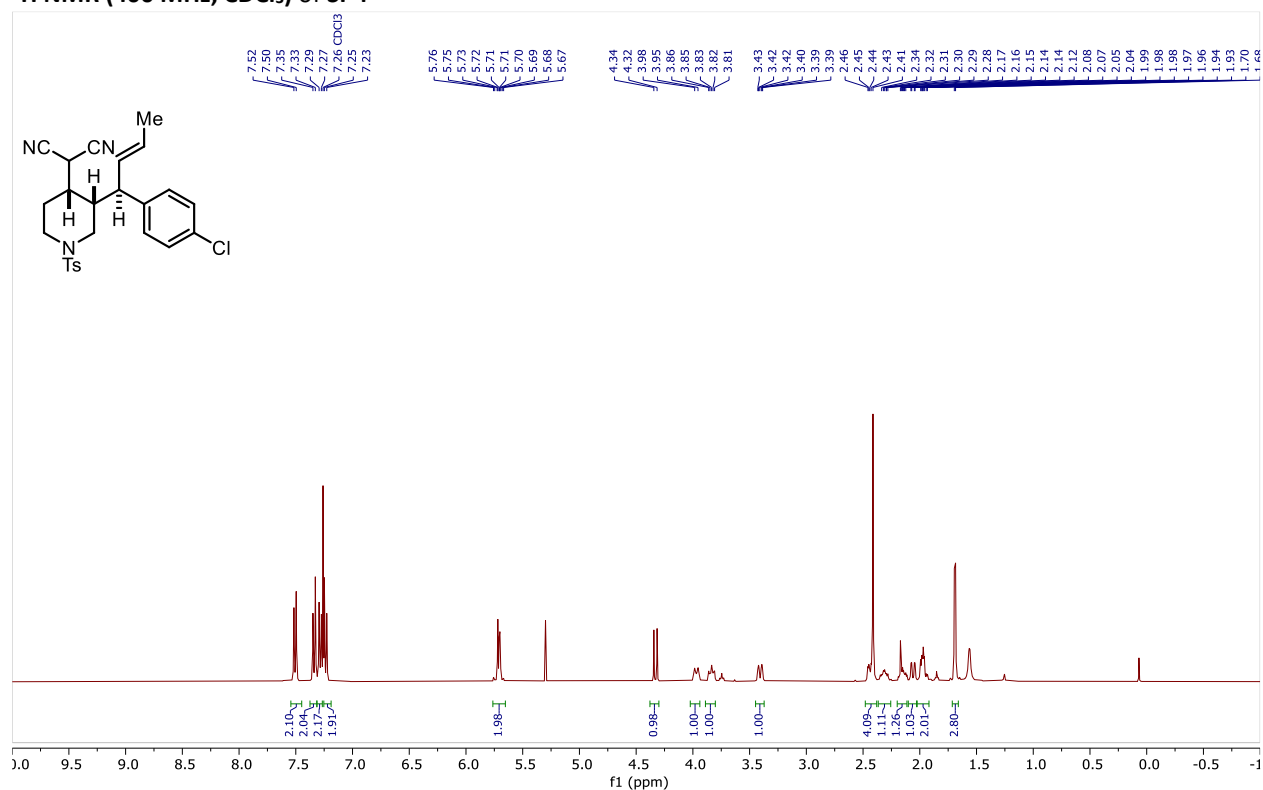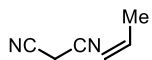

**<sup>13</sup>C NMR: (101 MHz, CDCl<sub>3</sub>) of SI-4**

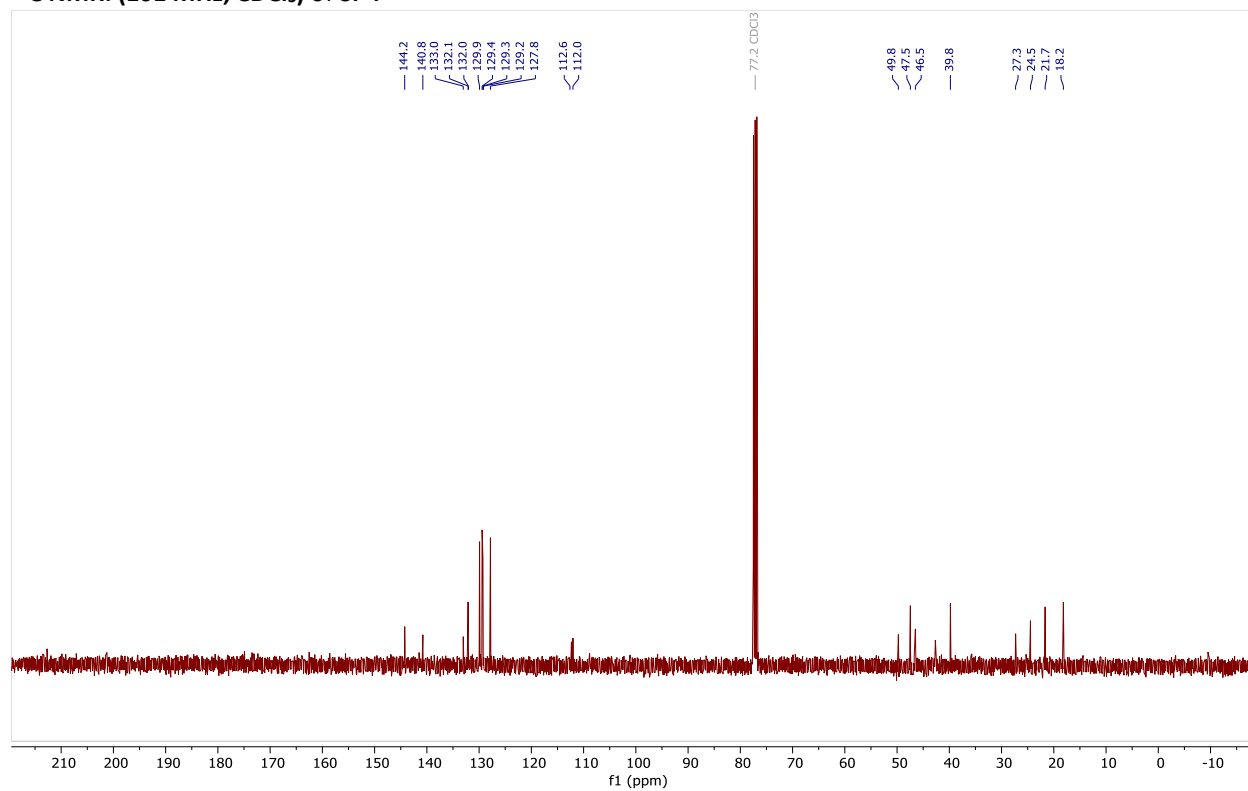

**<sup>1</sup>H NMR (400 MHz, CD<sub>3</sub>CN) of SI-5**

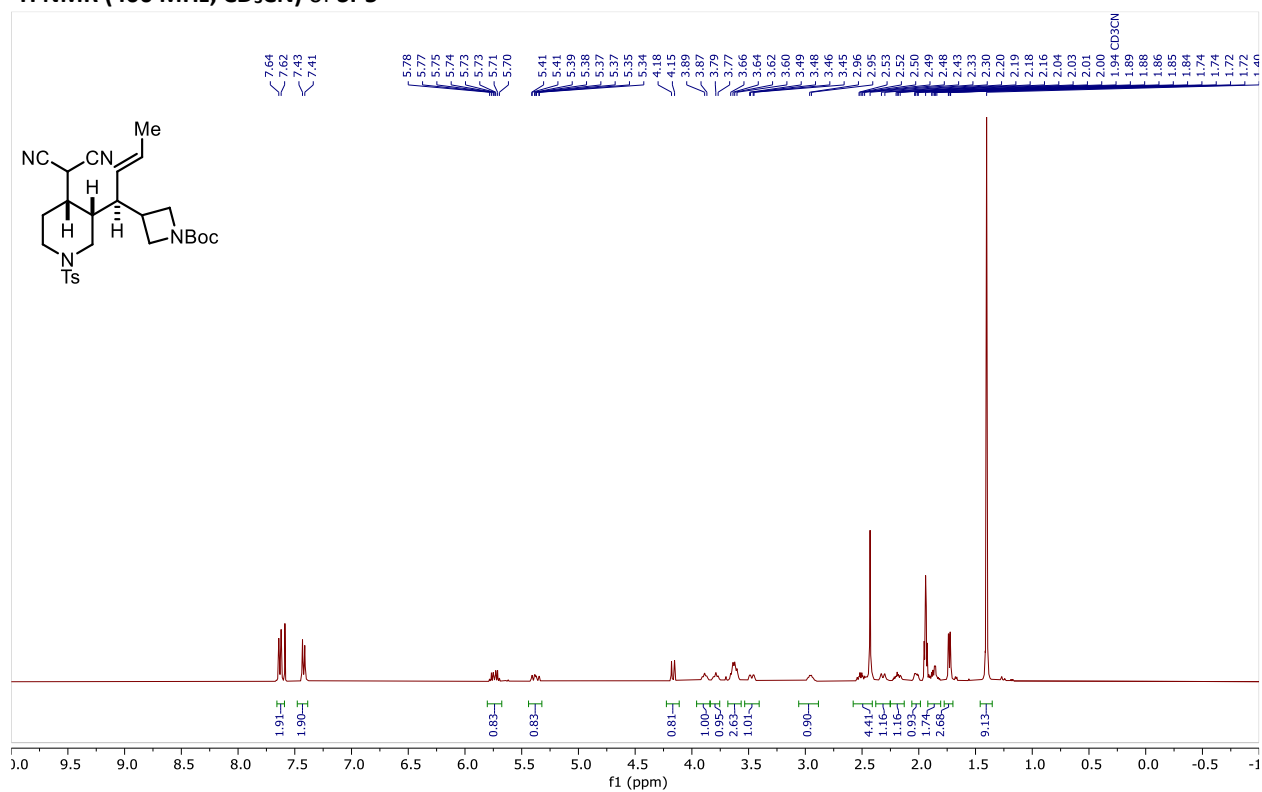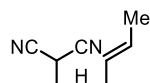

**<sup>13</sup>C NMR (101 MHz, CD<sub>3</sub>CN) of SI-5**

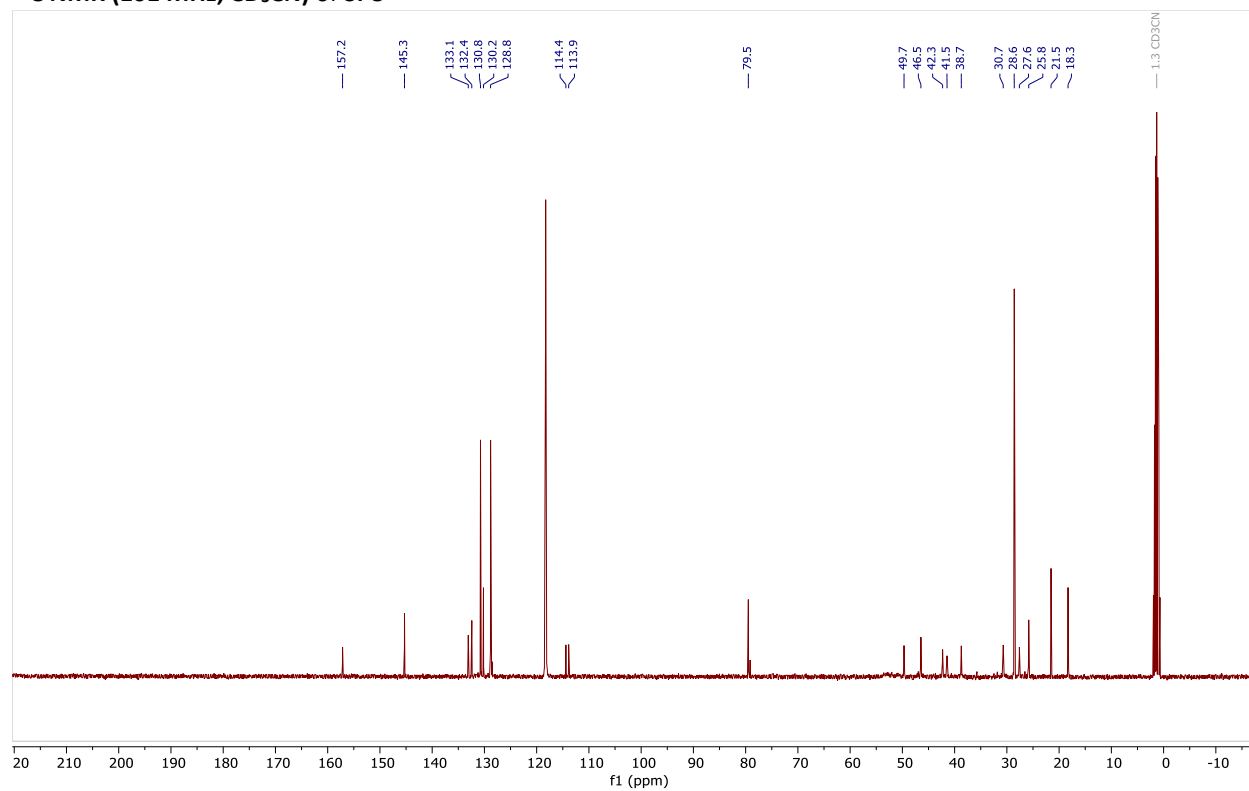

**<sup>1</sup>H NMR (400 MHz, CD<sub>3</sub>CN) of SI-6**

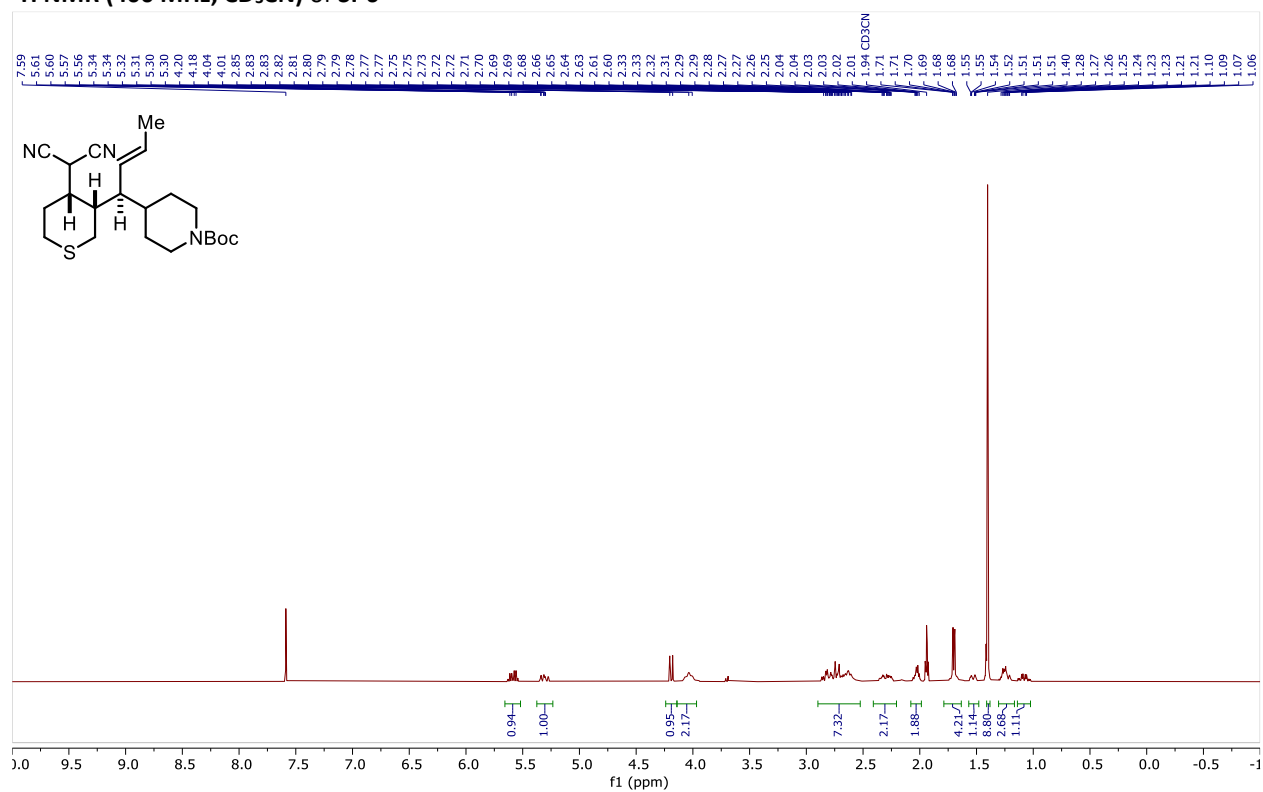



**<sup>13</sup>C NMR (101 MHz, CD<sub>3</sub>CN) of SI-6**

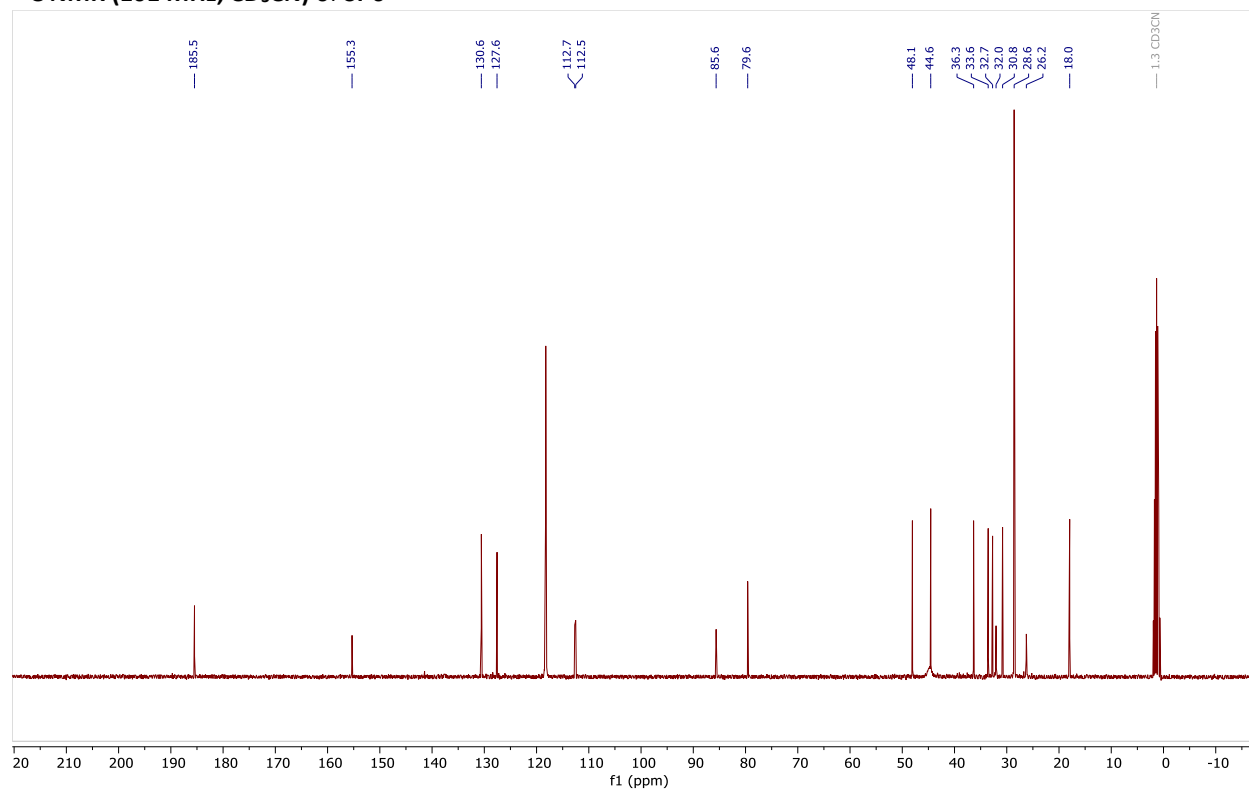

**<sup>1</sup>H NMR (500 MHz, DMSO-*d*<sub>6</sub>, 354 K) of SI-7**

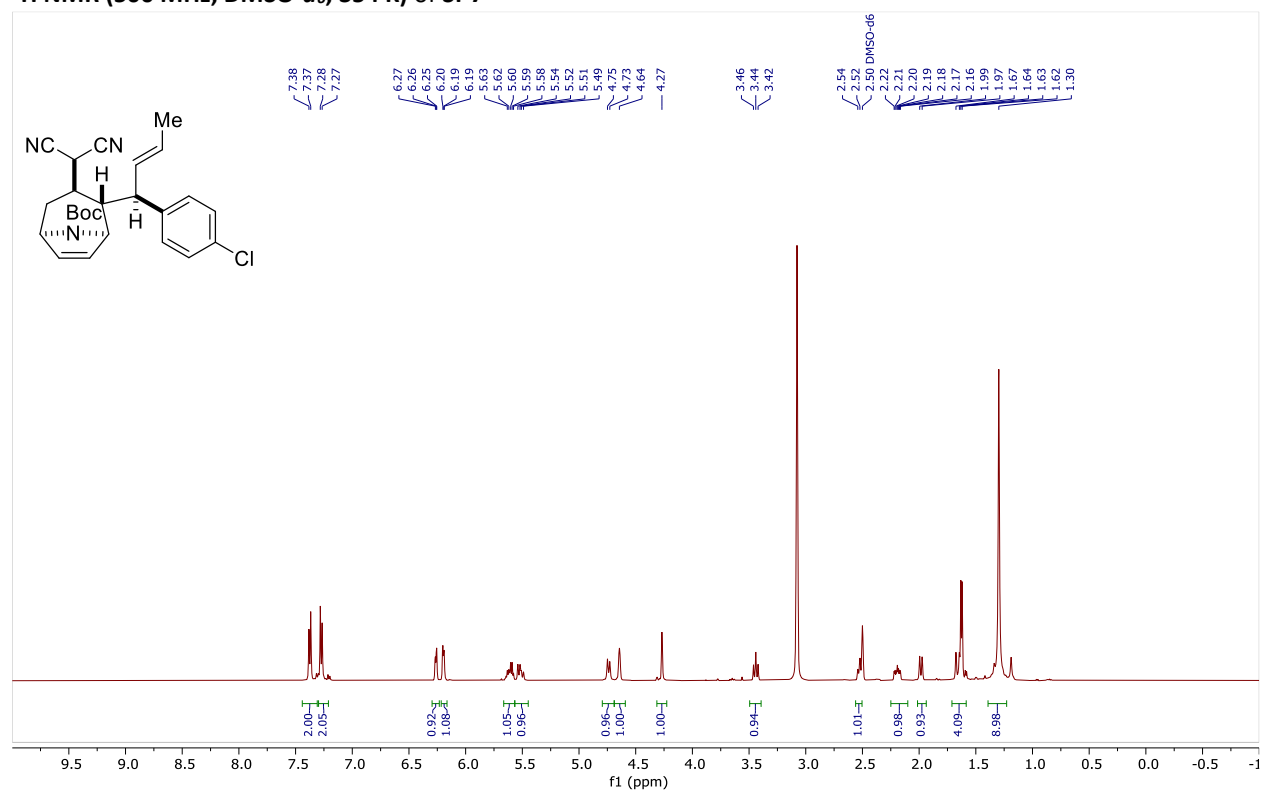

**<sup>13</sup>C NMR (126 MHz, DMSO-*d*<sub>6</sub>, 354 K) of SI-7**

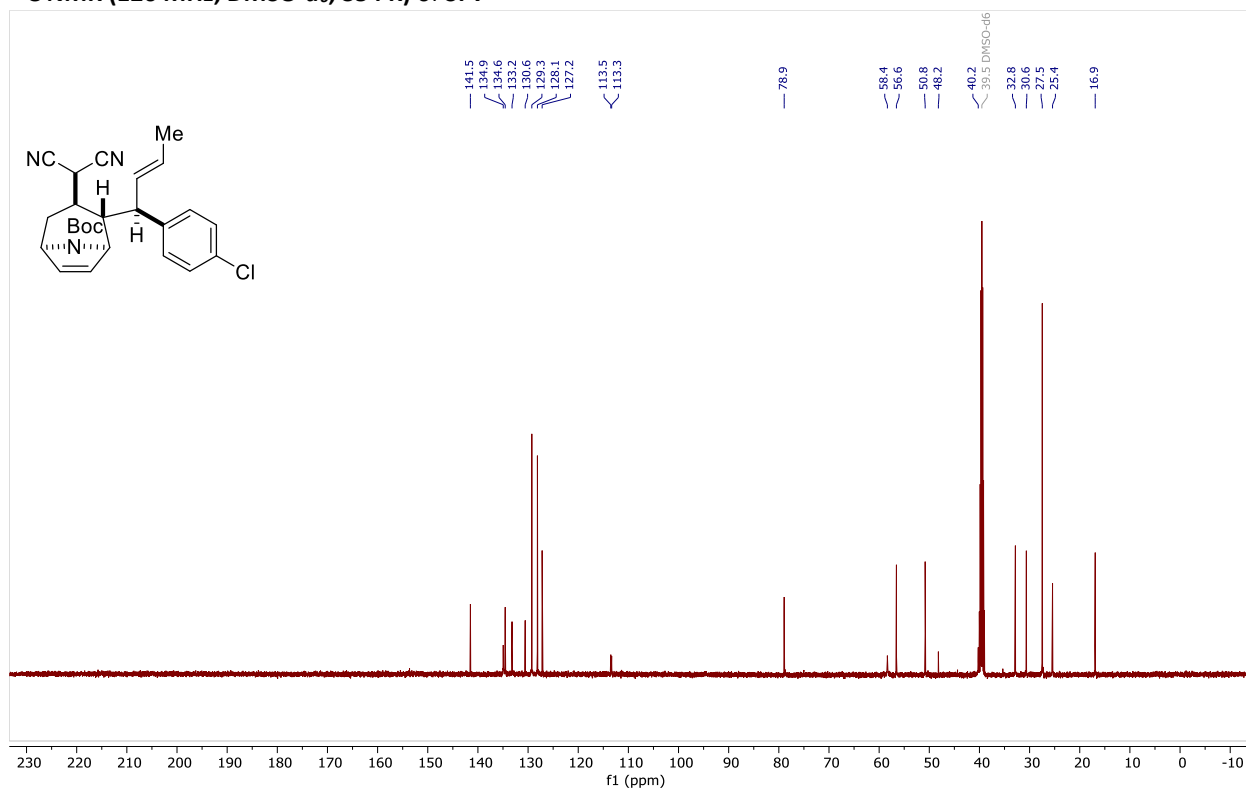

**<sup>1</sup>H NMR (400 MHz, CD<sub>3</sub>CN) of 6a**

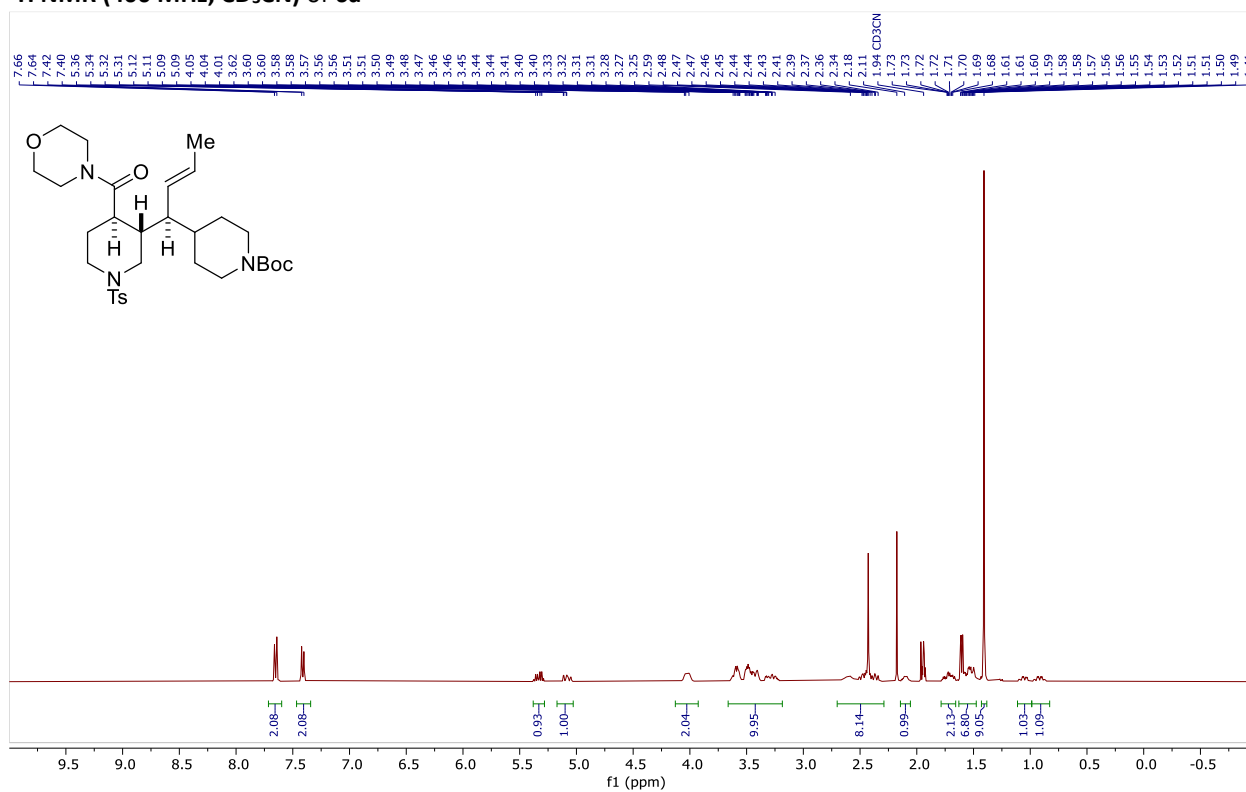

**<sup>13</sup>C NMR (101 MHz, CD<sub>3</sub>CN) of 6a**

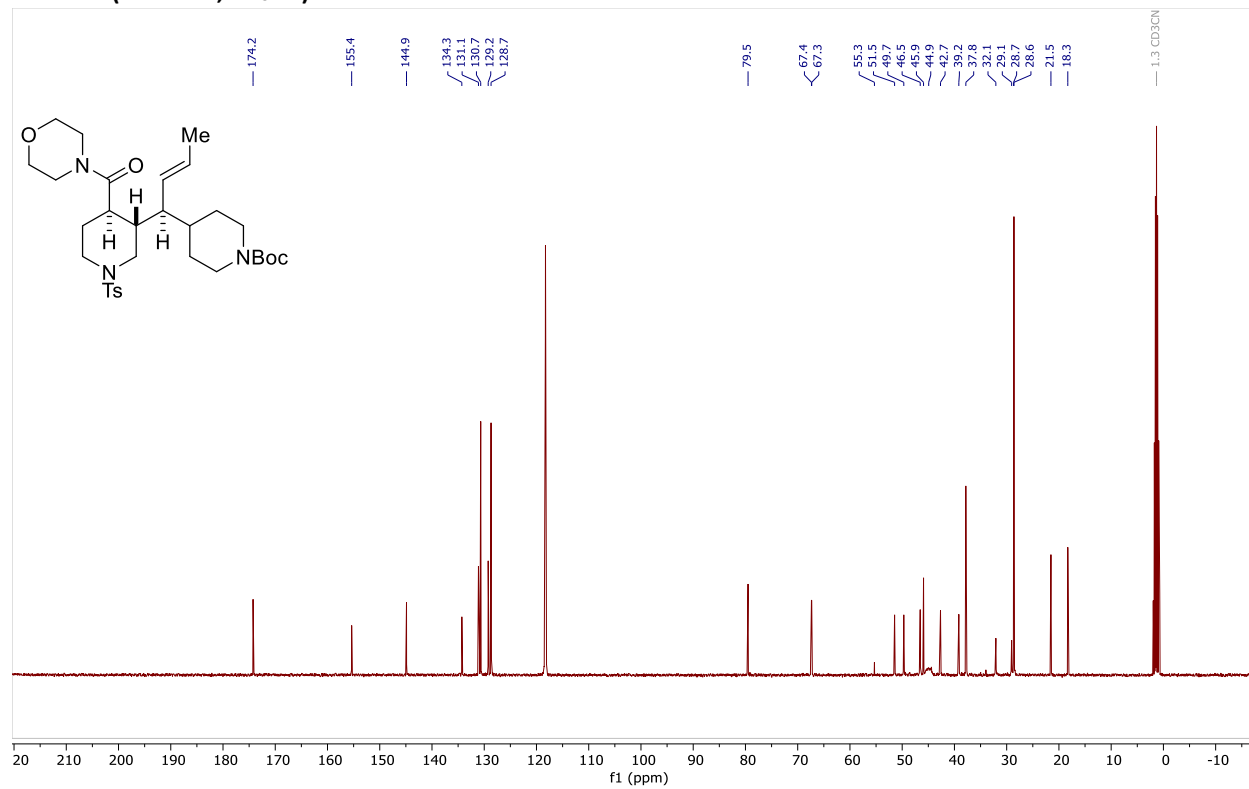

**<sup>1</sup>H NMR (400 MHz, CDCl<sub>3</sub>) of 6b**

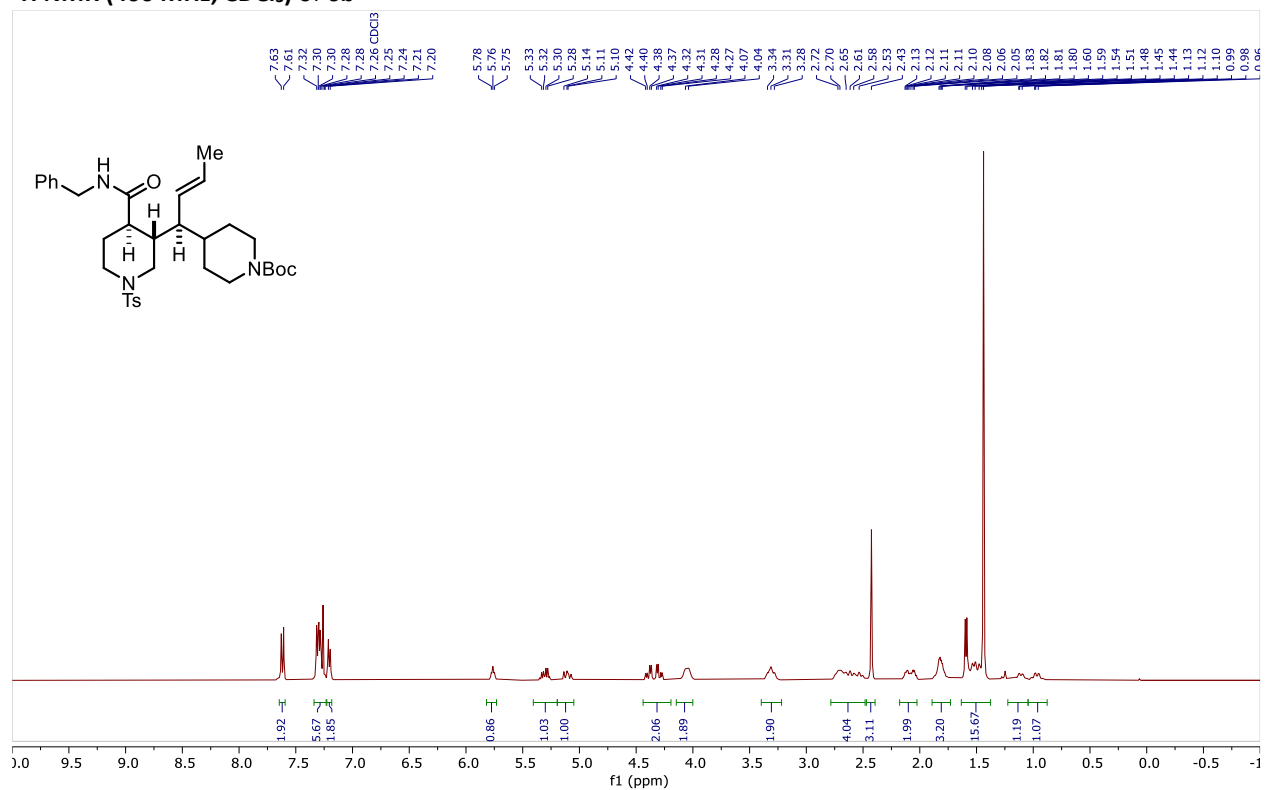

**<sup>13</sup>C NMR (101 MHz, CDCl<sub>3</sub>) of 6b**

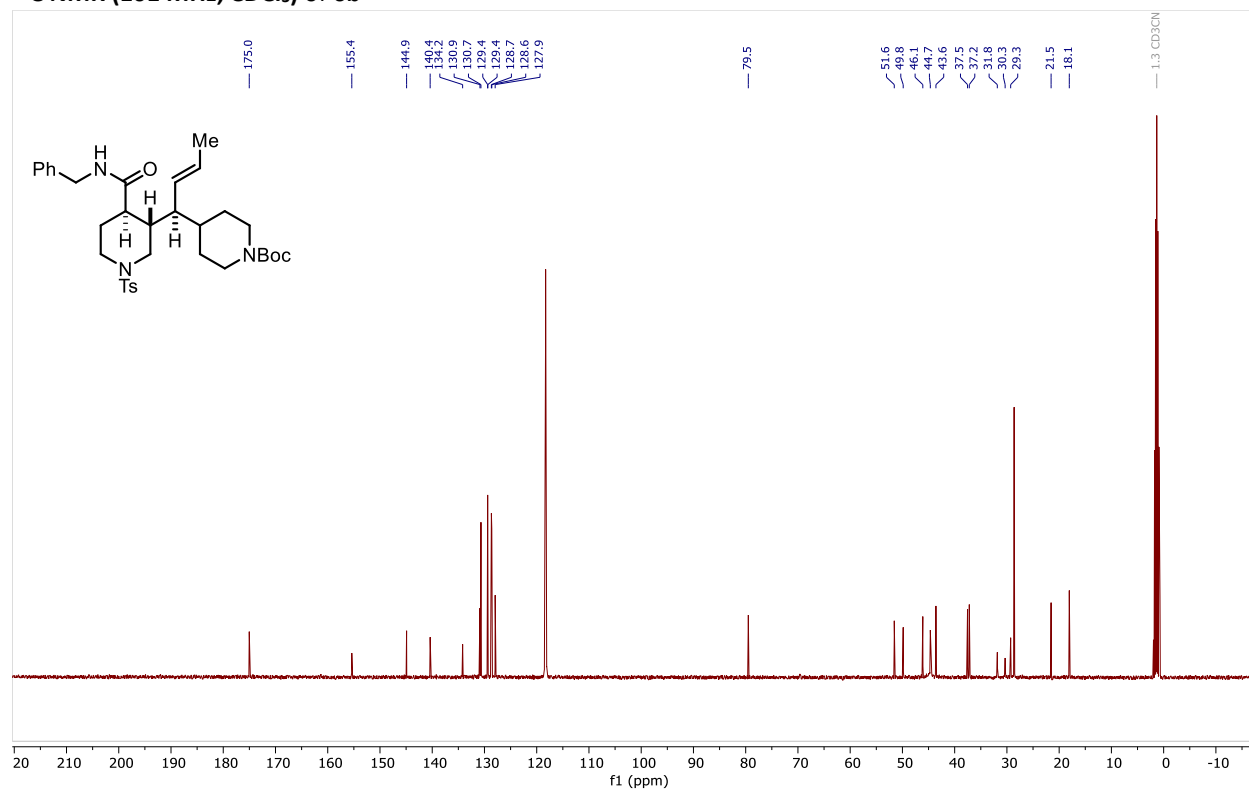

**<sup>1</sup>H NMR (600 MHz, CD<sub>3</sub>CN) of 6c**

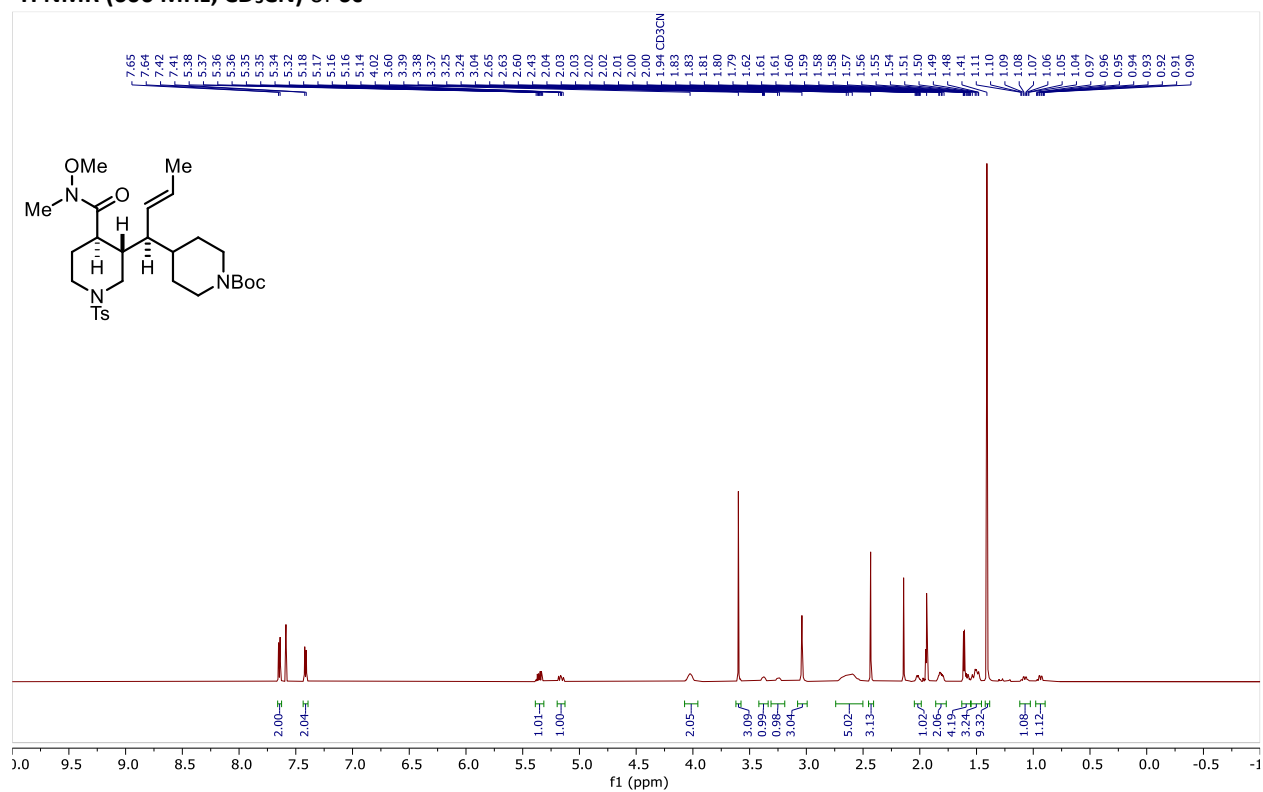

**<sup>13</sup>C NMR (151 MHz, CD<sub>3</sub>CN) of 6c**

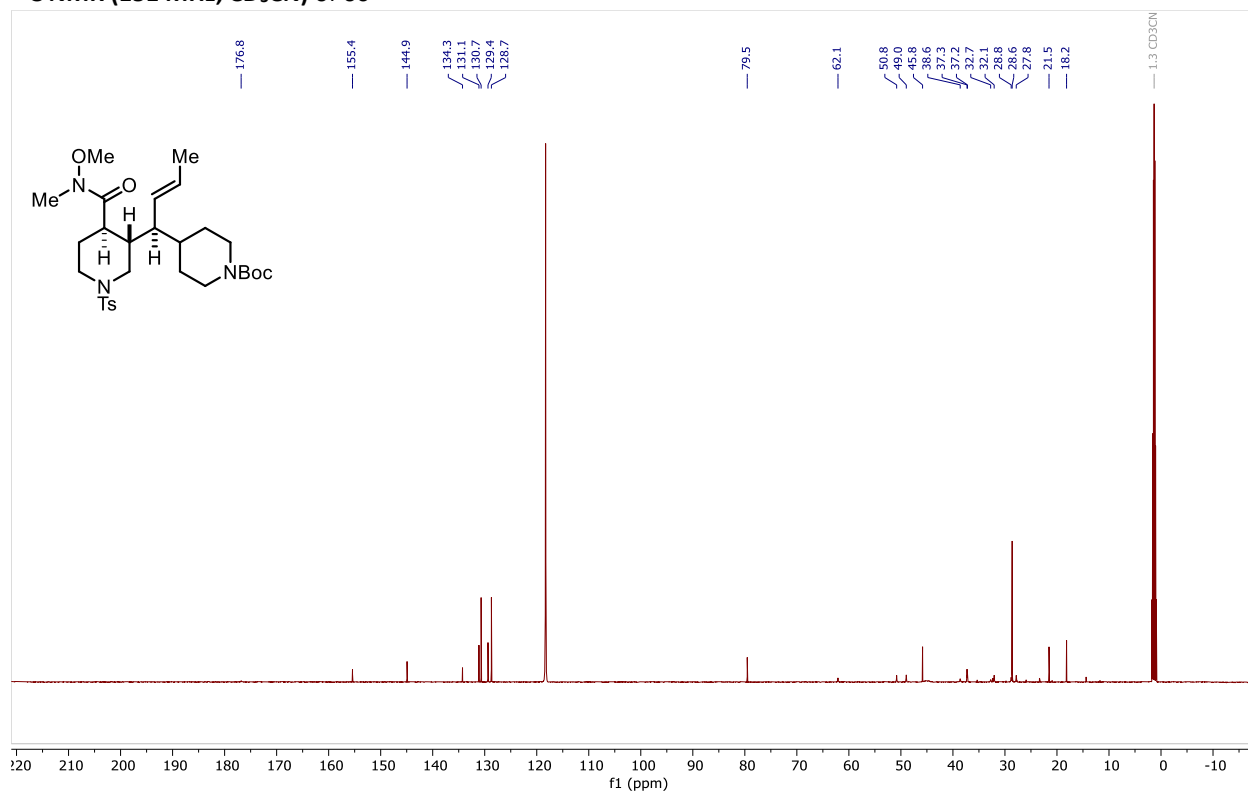

**<sup>1</sup>H NMR (400 MHz, CDCl<sub>3</sub>) of 6d**

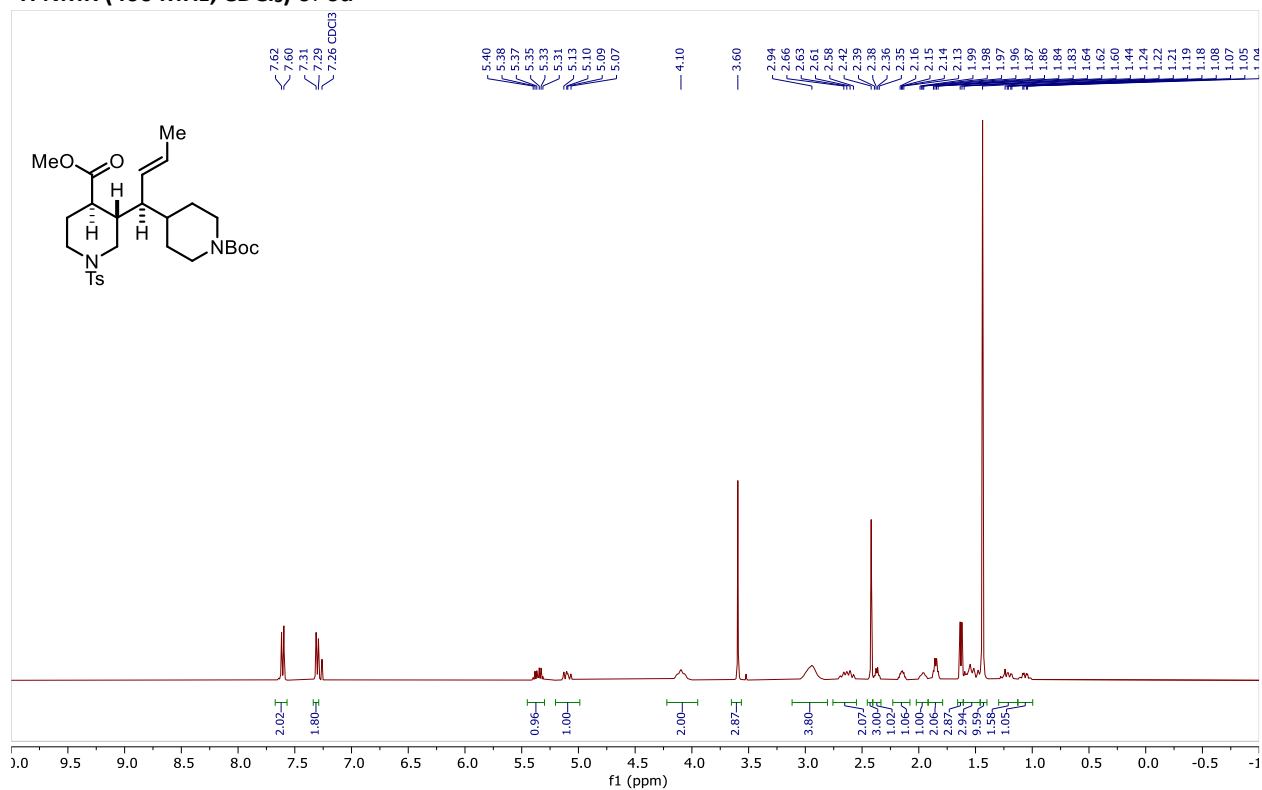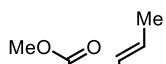

**<sup>13</sup>C NMR (101 MHz, CDCl<sub>3</sub>) of 6d**

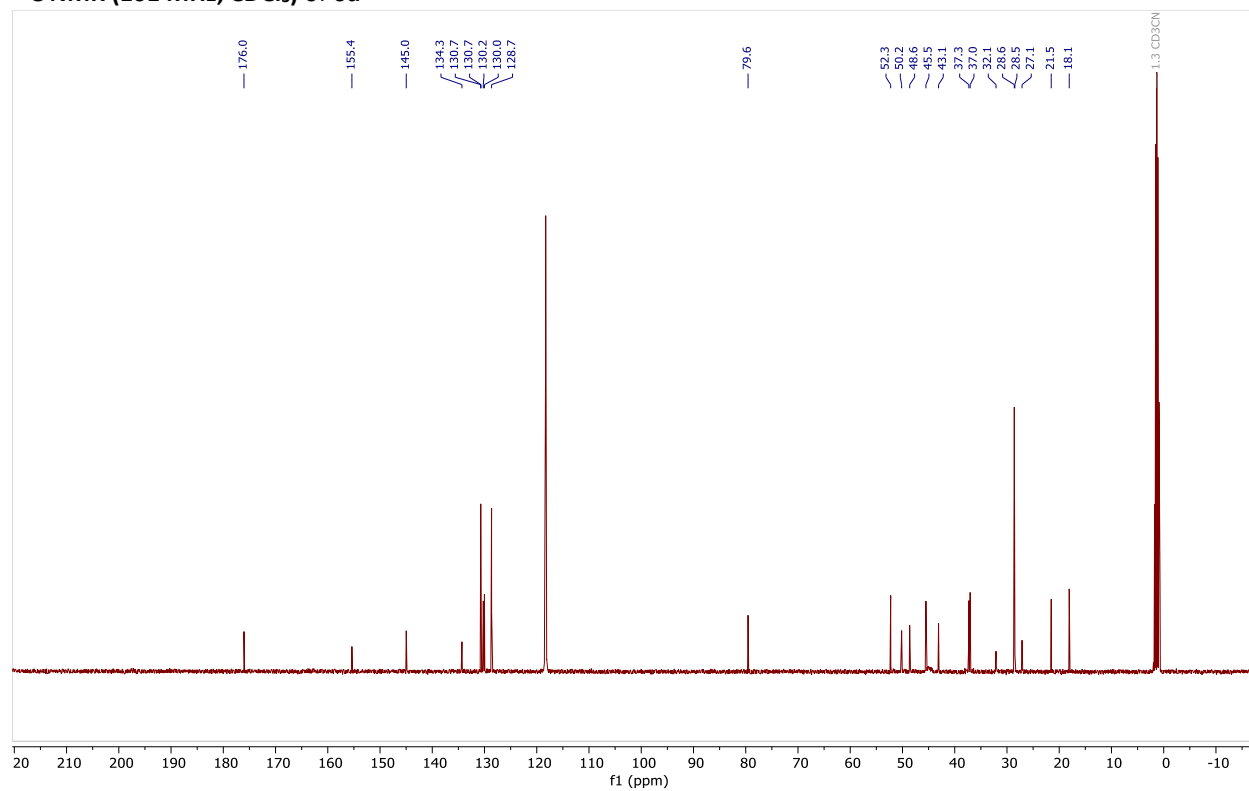

**<sup>1</sup>H NMR (400 MHz, CDCl<sub>3</sub>) of 6e**

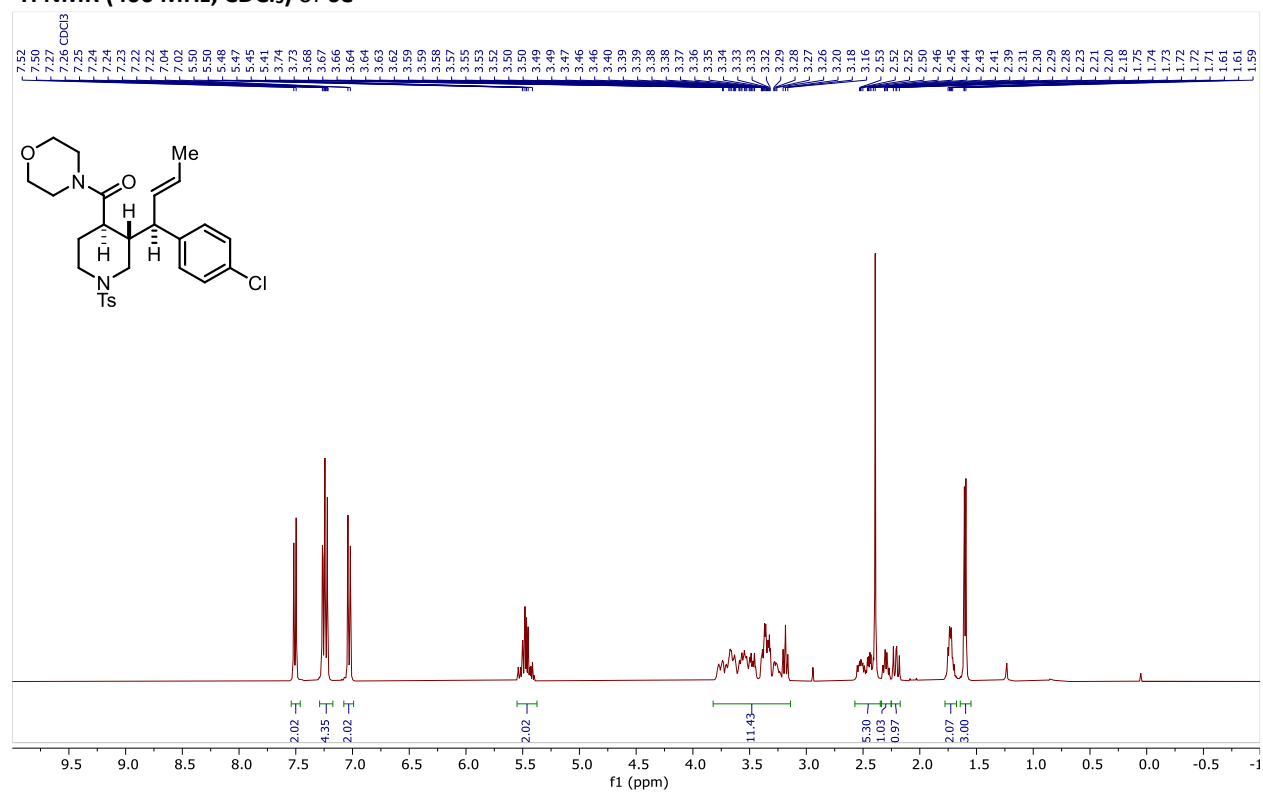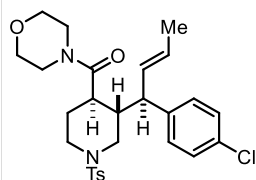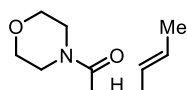

<sup>13</sup>C NMR (101 MHz, CDCl<sub>3</sub>) of 6e

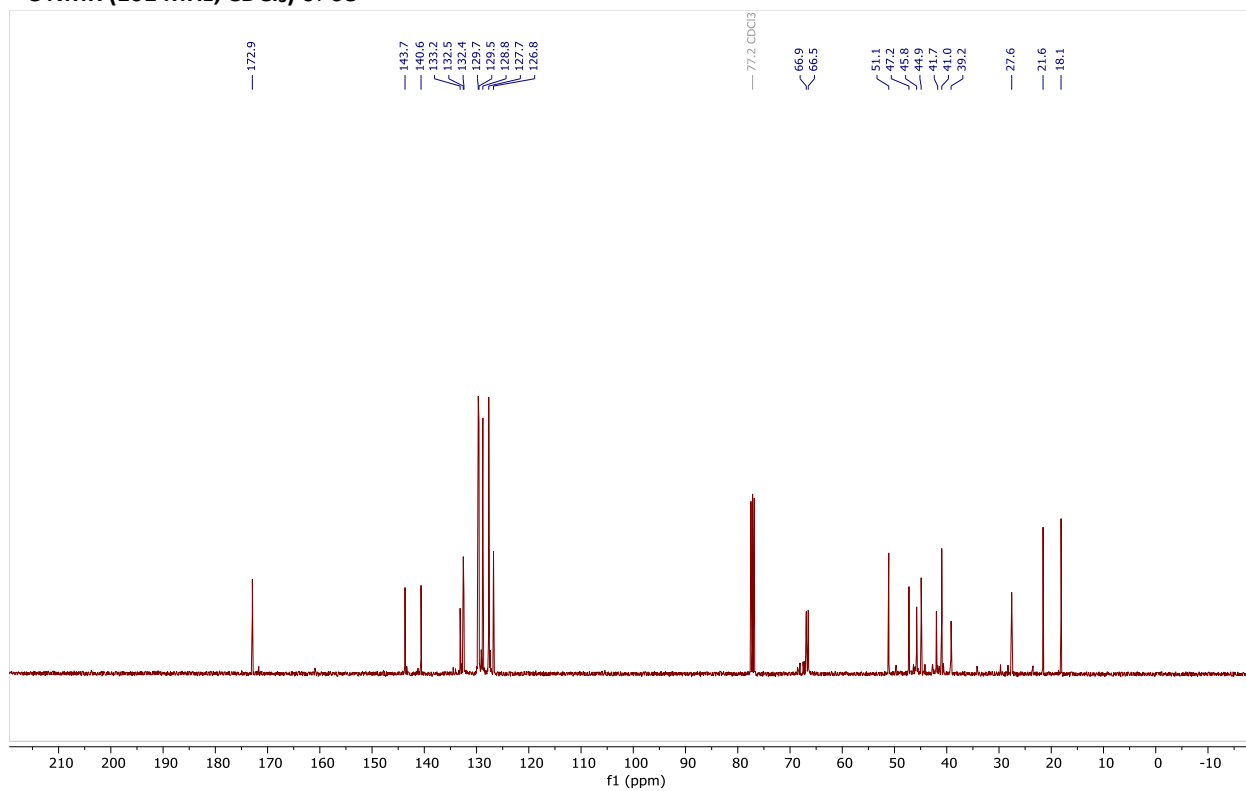

<sup>1</sup>H NMR (400 MHz, CDCl<sub>3</sub>) of 6f

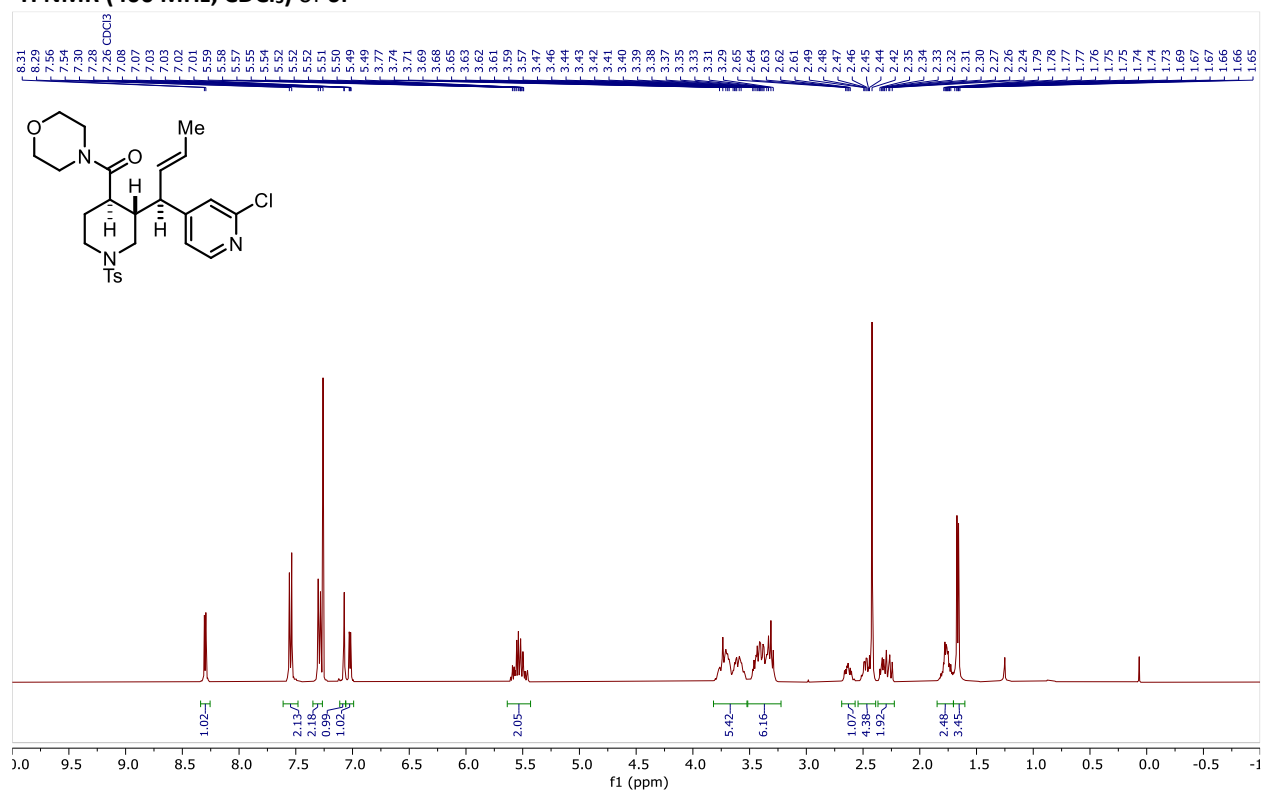





**<sup>13</sup>C NMR (101 MHz, CD<sub>3</sub>CN) of 6g**

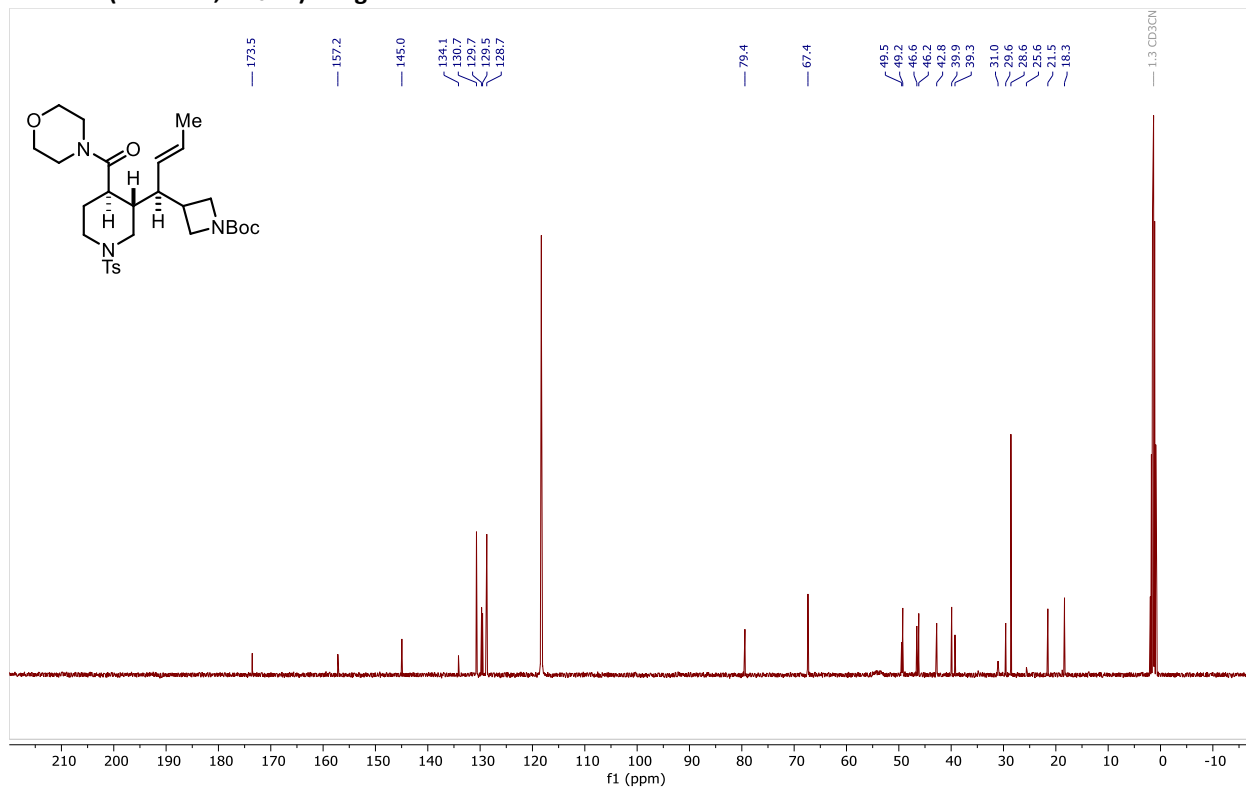

**<sup>1</sup>H NMR (400 MHz, CD<sub>3</sub>CN) of 6h**

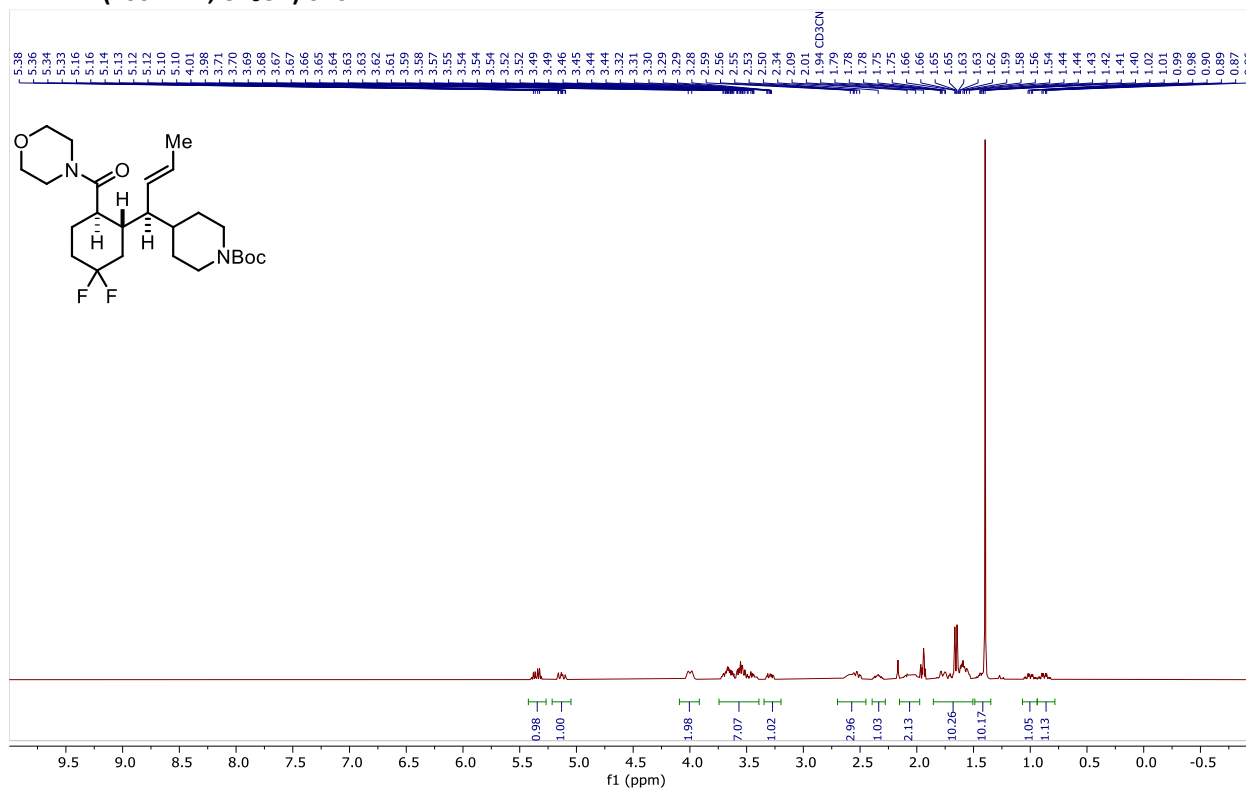

**<sup>13</sup>C NMR (101 MHz, CD<sub>3</sub>CN) of 6h**

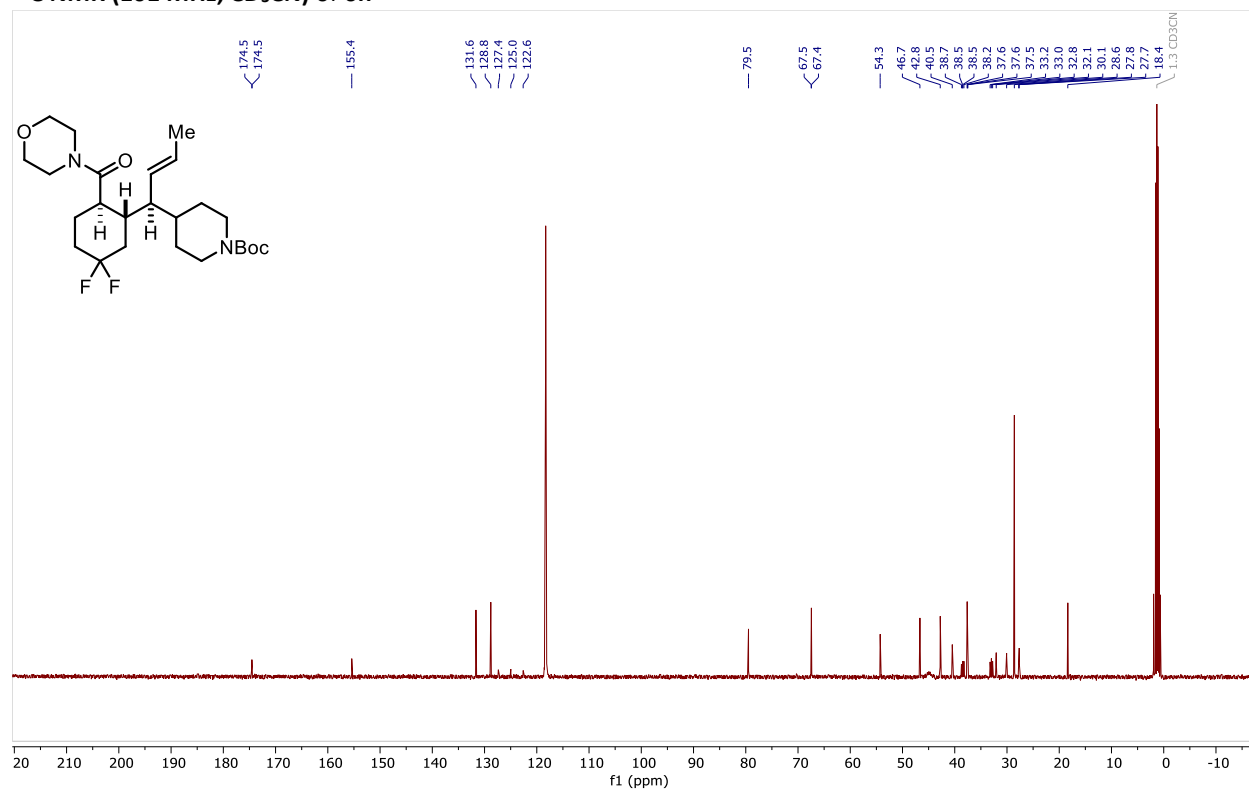

**<sup>19</sup>F NMR (377 MHz, CDCl<sub>3</sub>) of 6h**

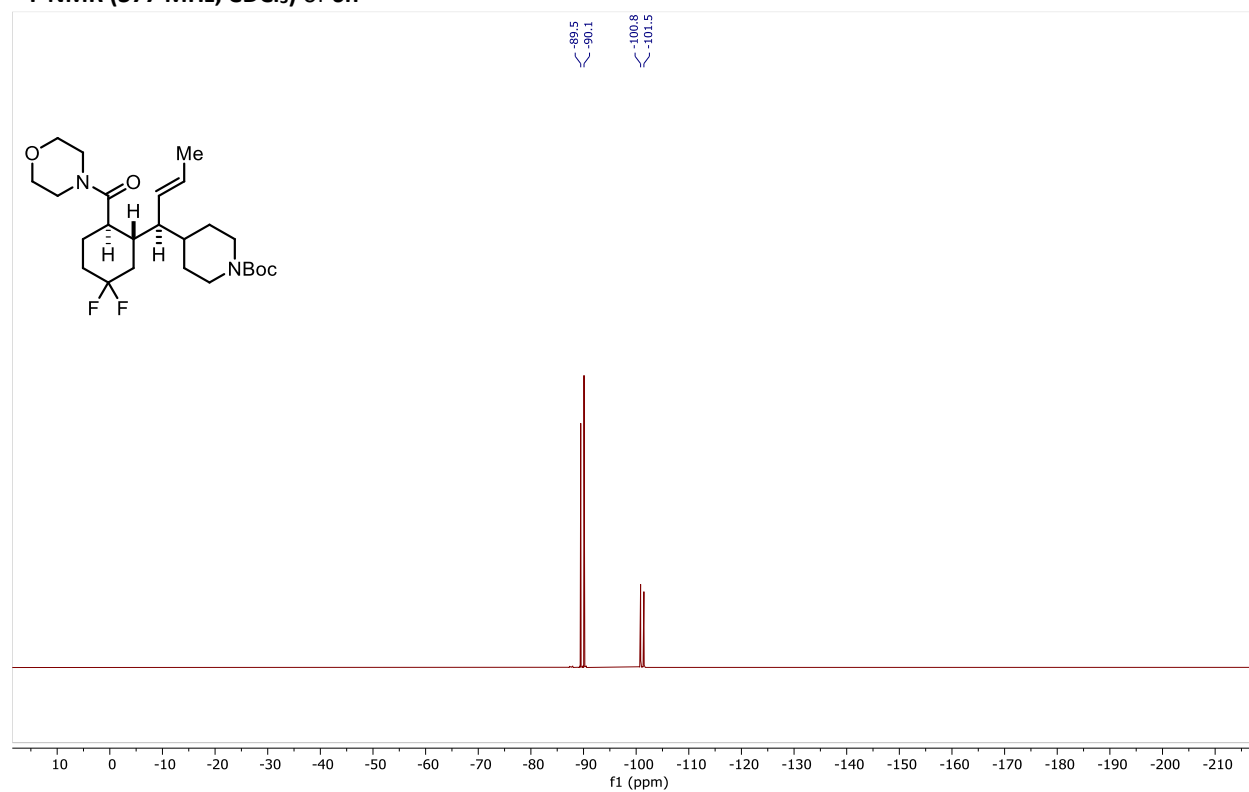

**<sup>1</sup>H NMR (400 MHz, CD<sub>3</sub>CN) of 6i**

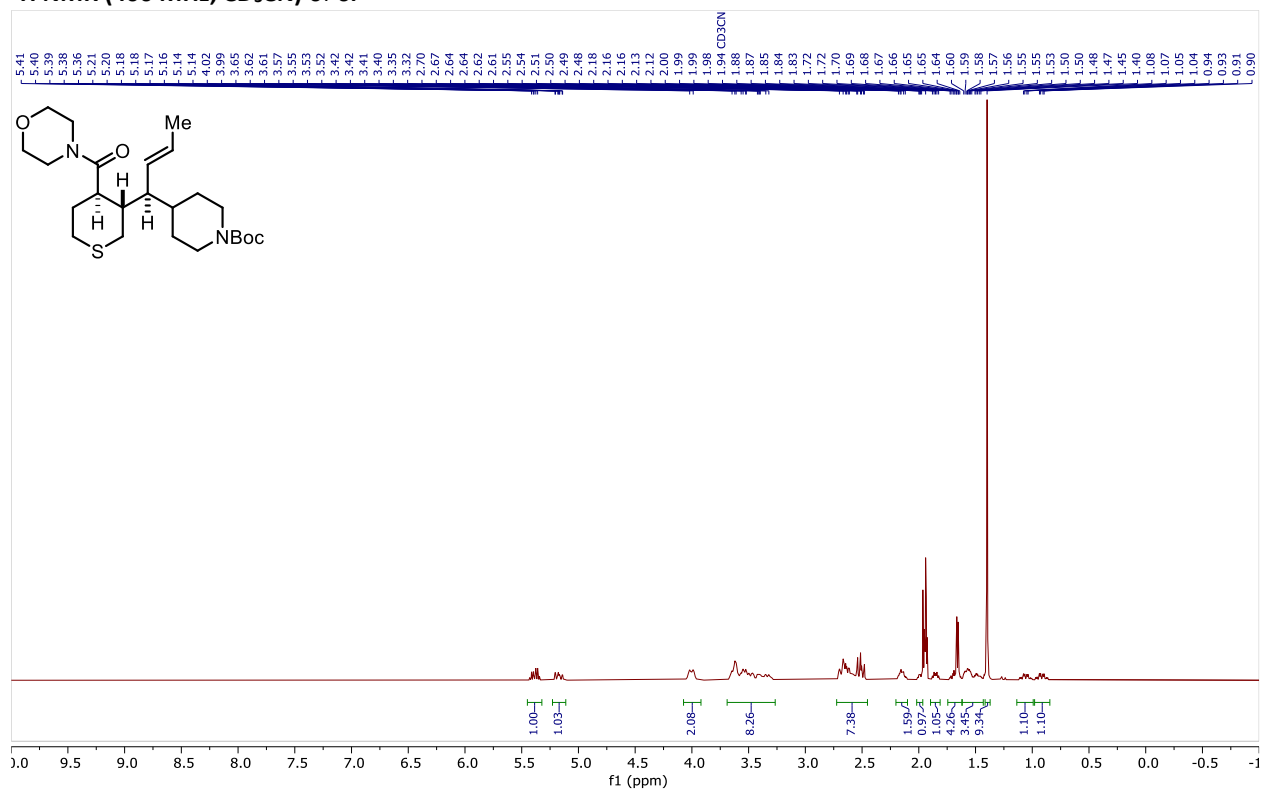

**<sup>13</sup>C NMR (101 MHz, CD<sub>3</sub>CN) of 6i**

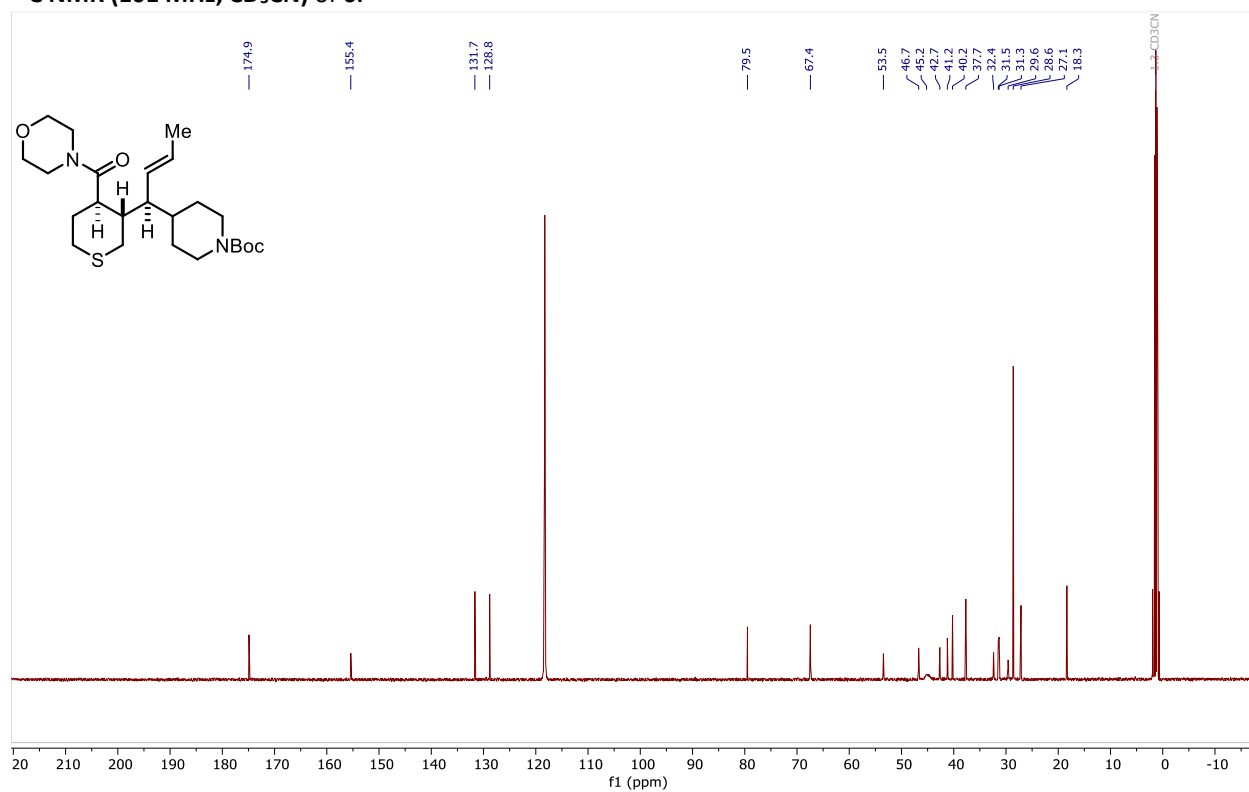

**<sup>1</sup>H NMR (600 MHz, DMSO-*d*<sub>6</sub>, 353 K) of 6j**

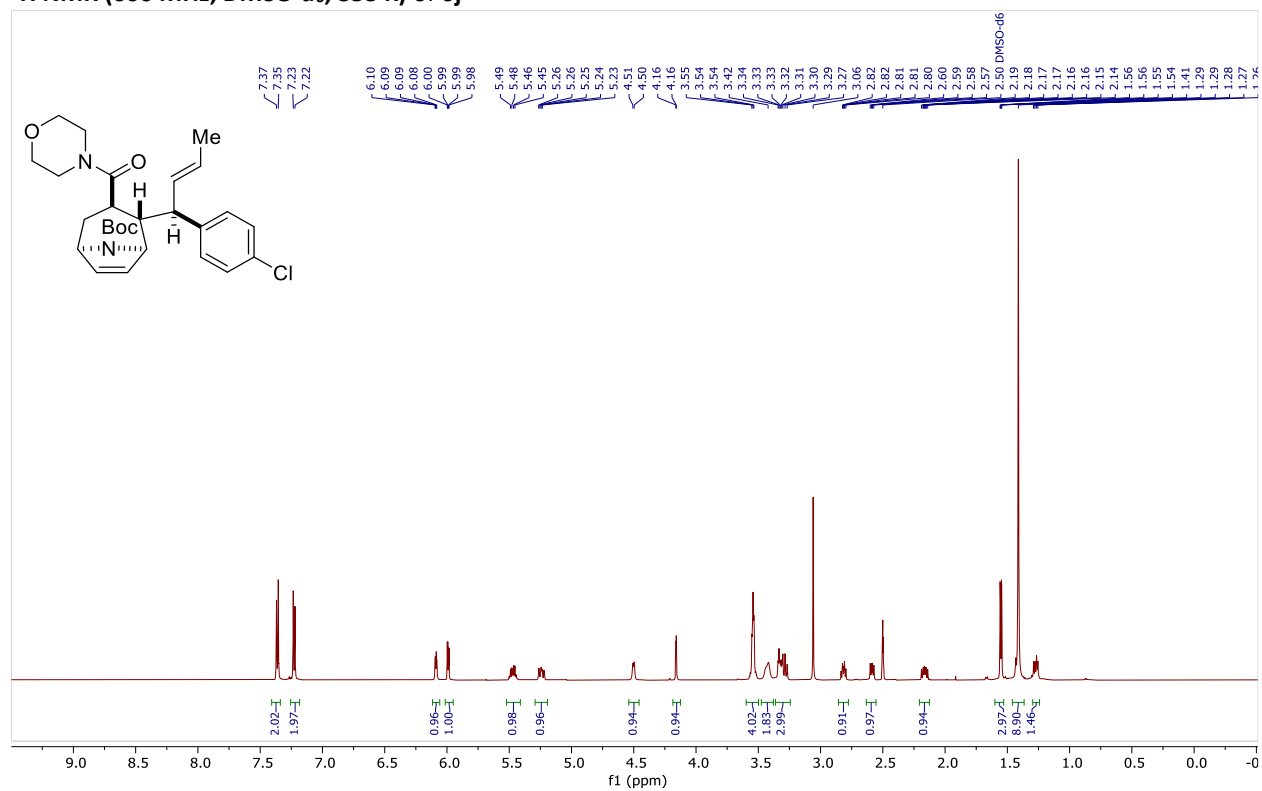

**<sup>13</sup>C NMR (151 MHz, DMSO-*d*<sub>6</sub>, 353 K) of 6j**

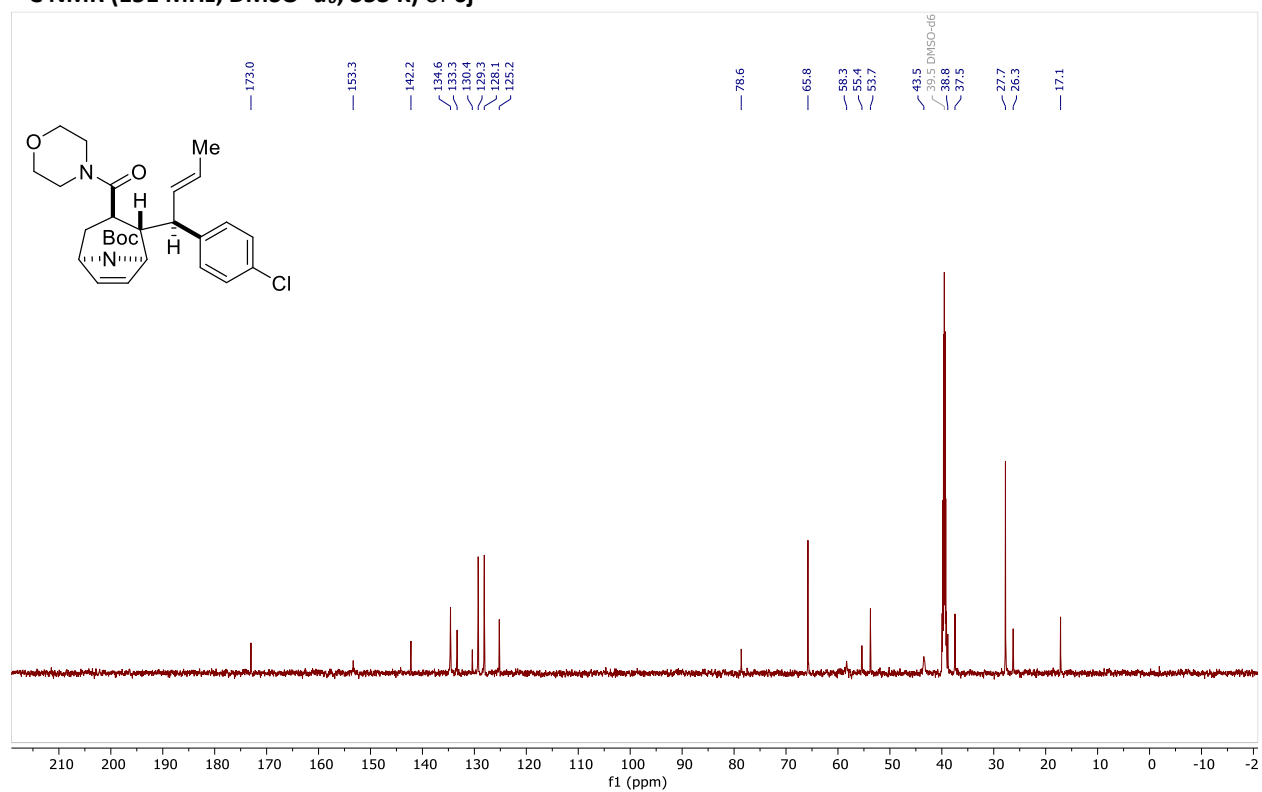

**<sup>1</sup>H NMR (500 MHz, DMSO-*d*<sub>6</sub>, 373 K) of 9**

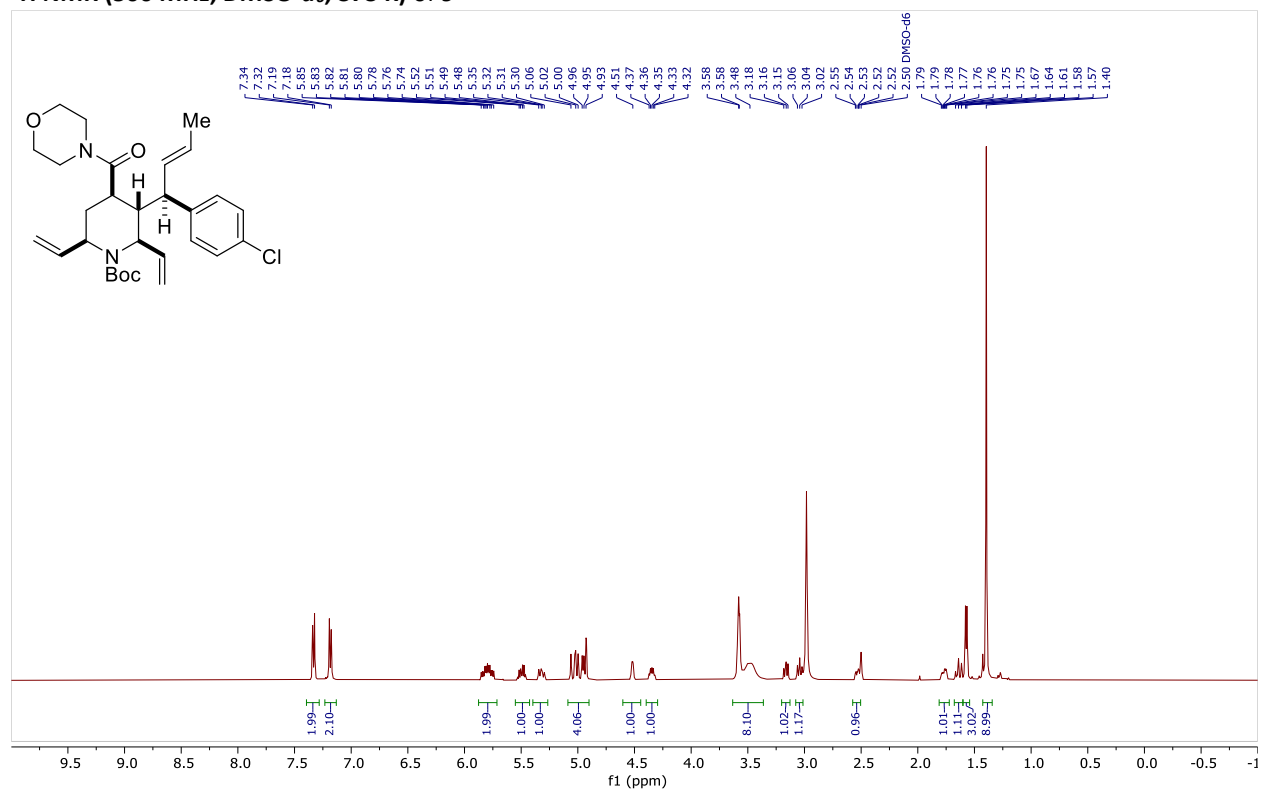

**<sup>13</sup>C NMR (126 MHz, DMSO-*d*<sub>6</sub>, 373 K) of 9**

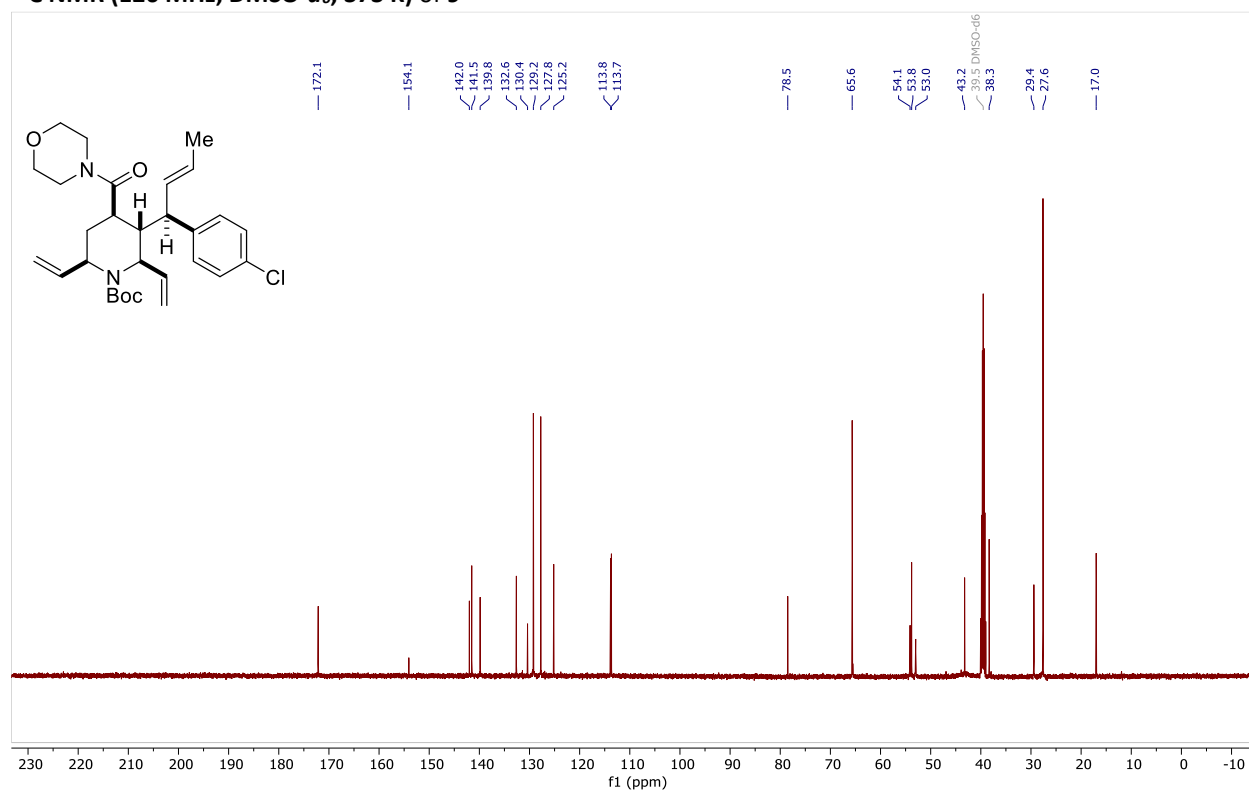

**<sup>1</sup>H NMR (600 MHz, CDCl<sub>3</sub>) of 7**

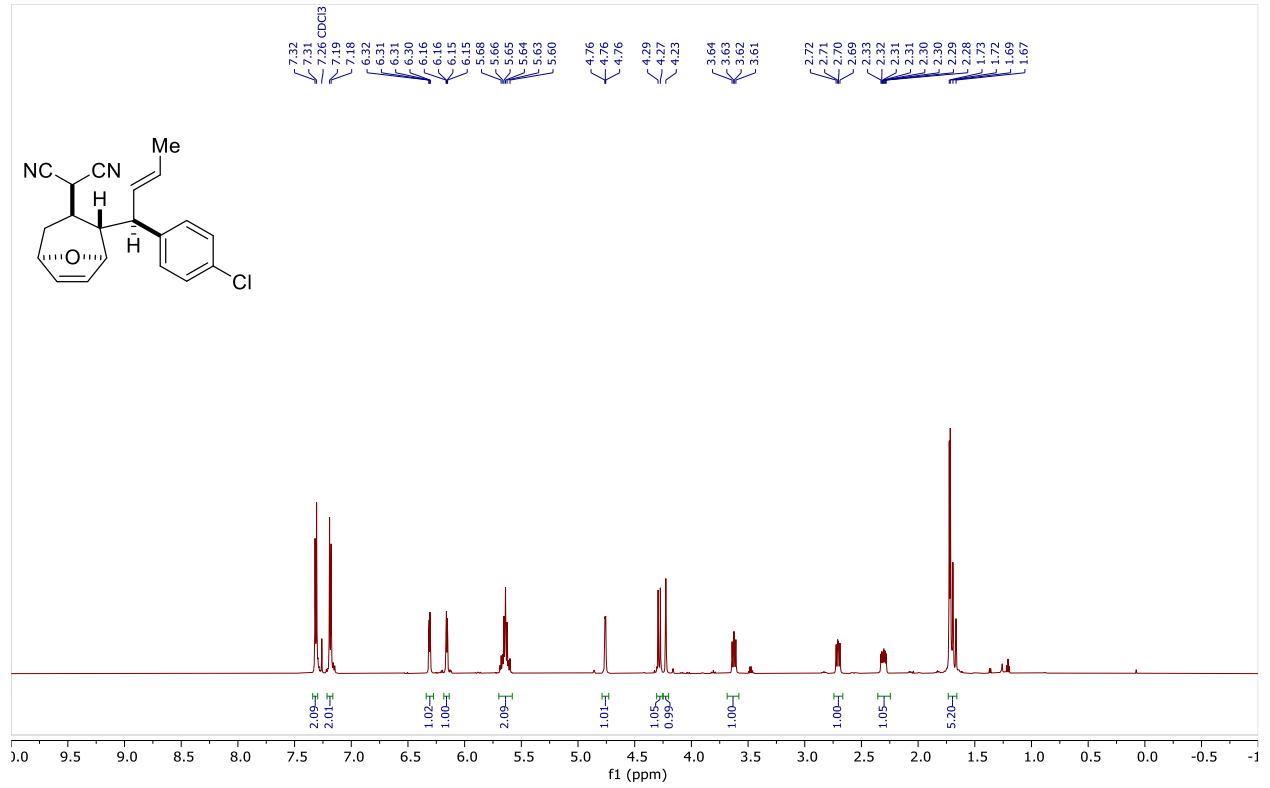

**<sup>13</sup>C NMR (151 MHz, CDCl<sub>3</sub>) of 7**

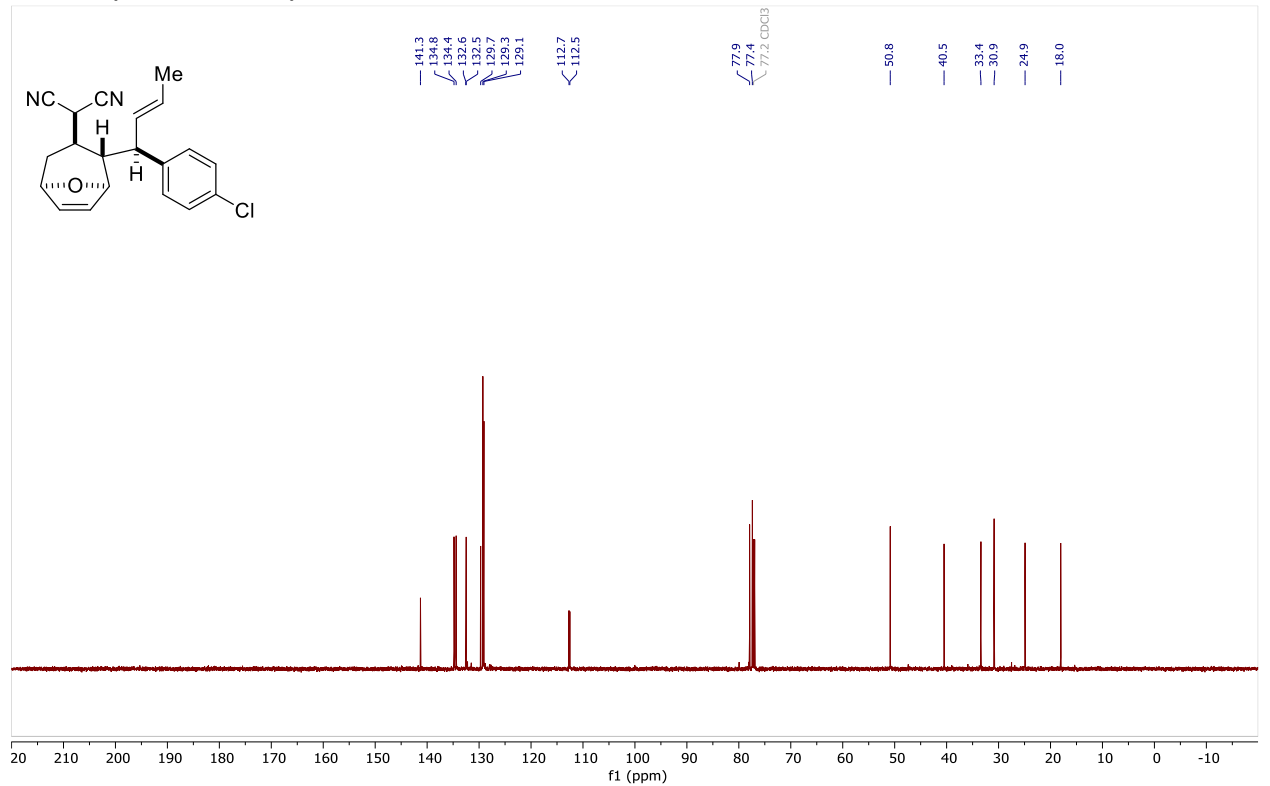

**<sup>1</sup>H NMR (400 MHz, CDCl<sub>3</sub>) of 8**

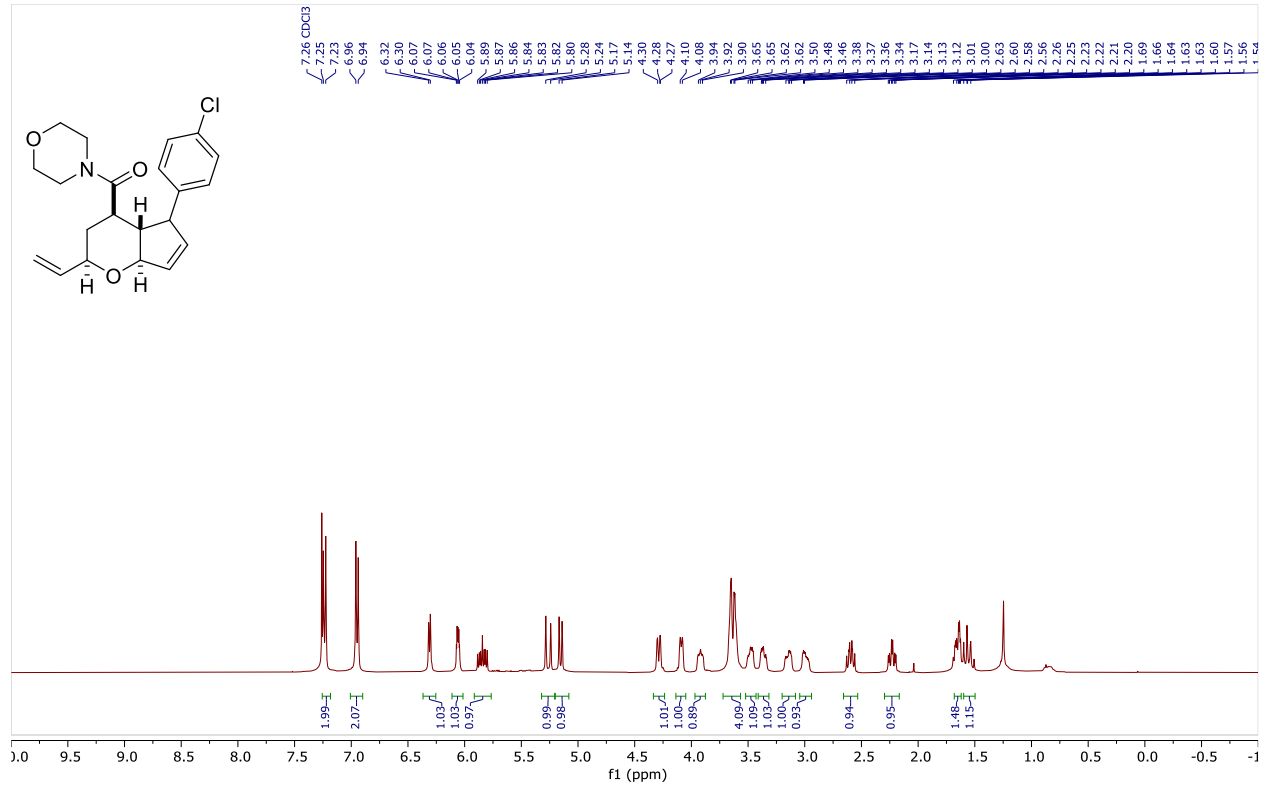

**<sup>13</sup>C NMR (151 MHz, CDCl<sub>3</sub>) of 8**

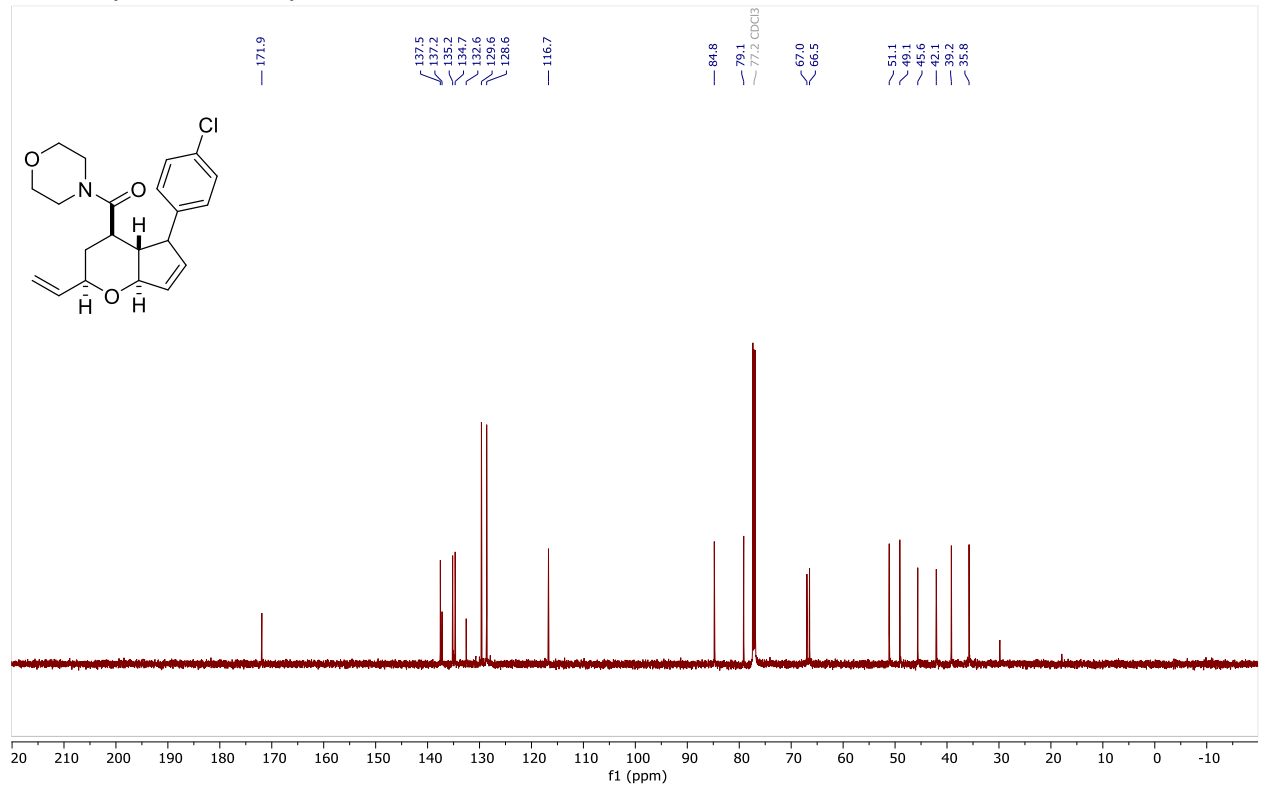

**<sup>1</sup>H NMR (400 MHz, CDCl<sub>3</sub>) of 10b**

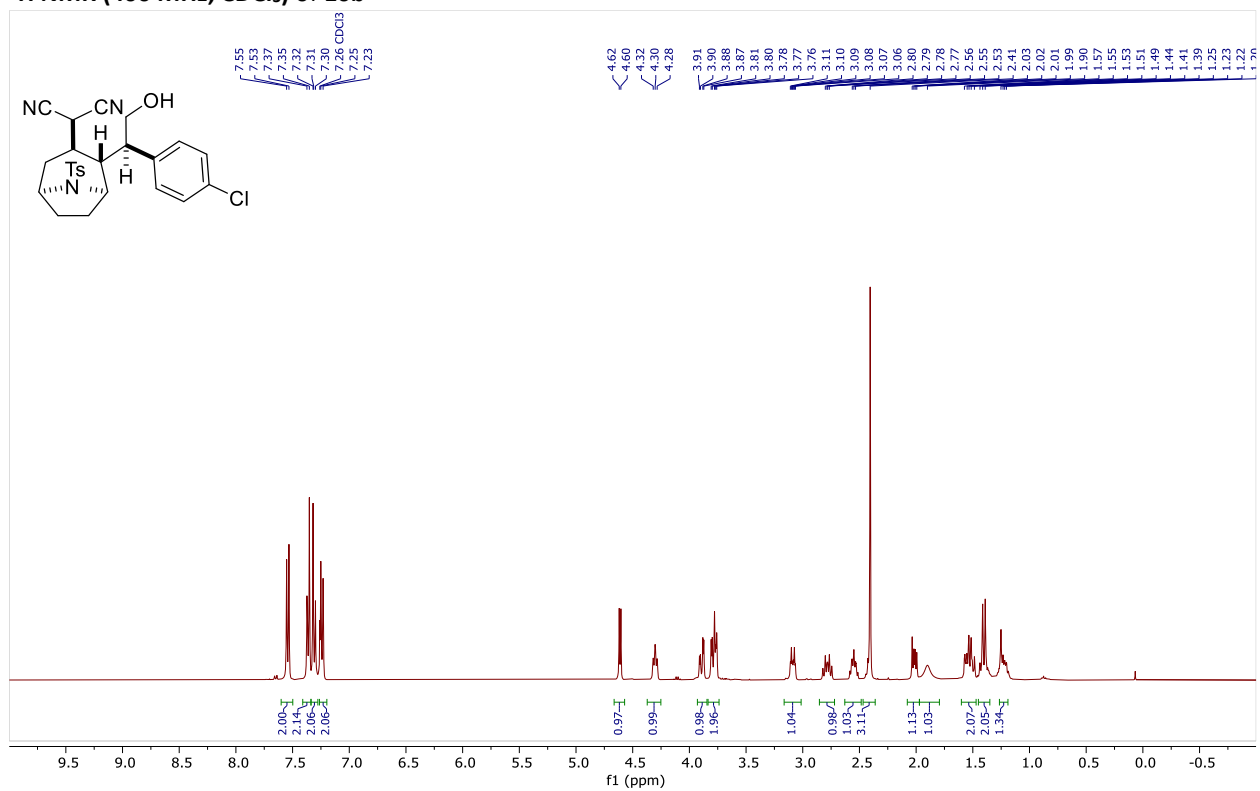

**<sup>13</sup>C NMR (101 MHz, CDCl<sub>3</sub>) of 10b**

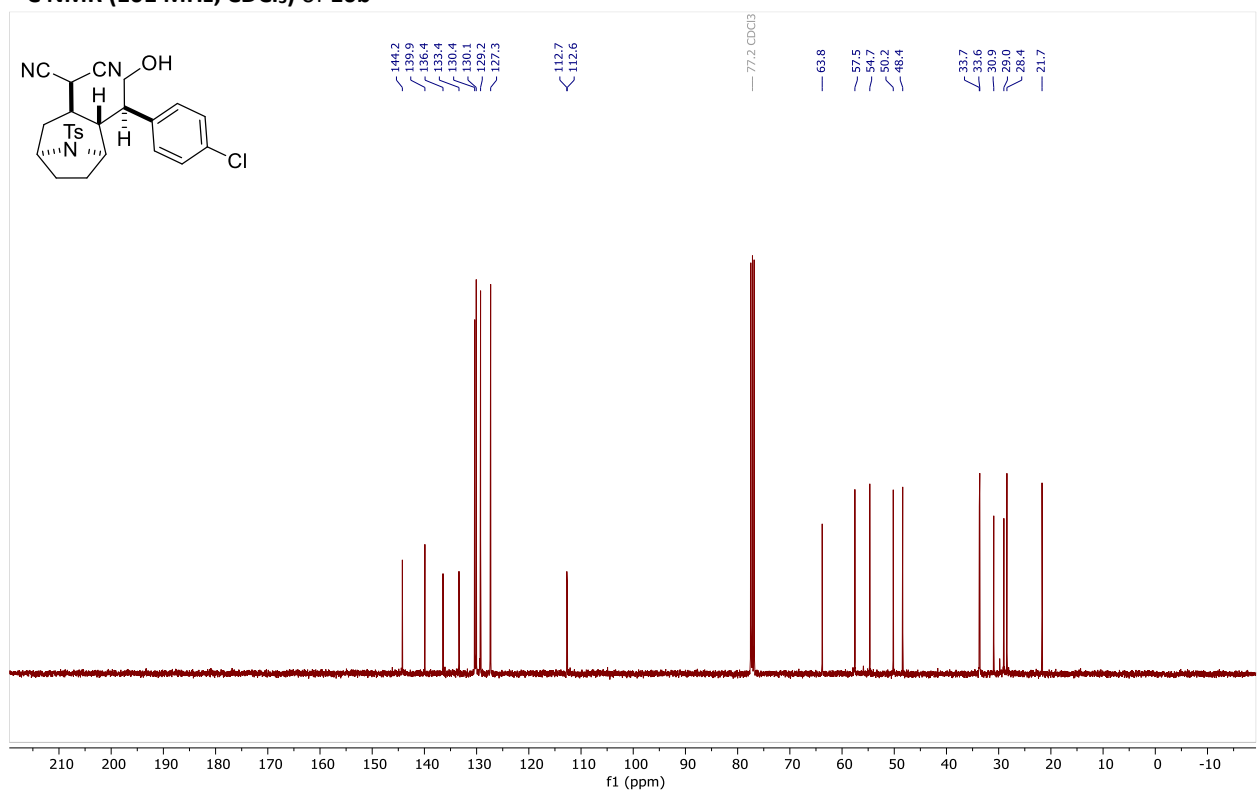



**<sup>1</sup>H NMR (400 MHz, CDCl<sub>3</sub>) of 10c**

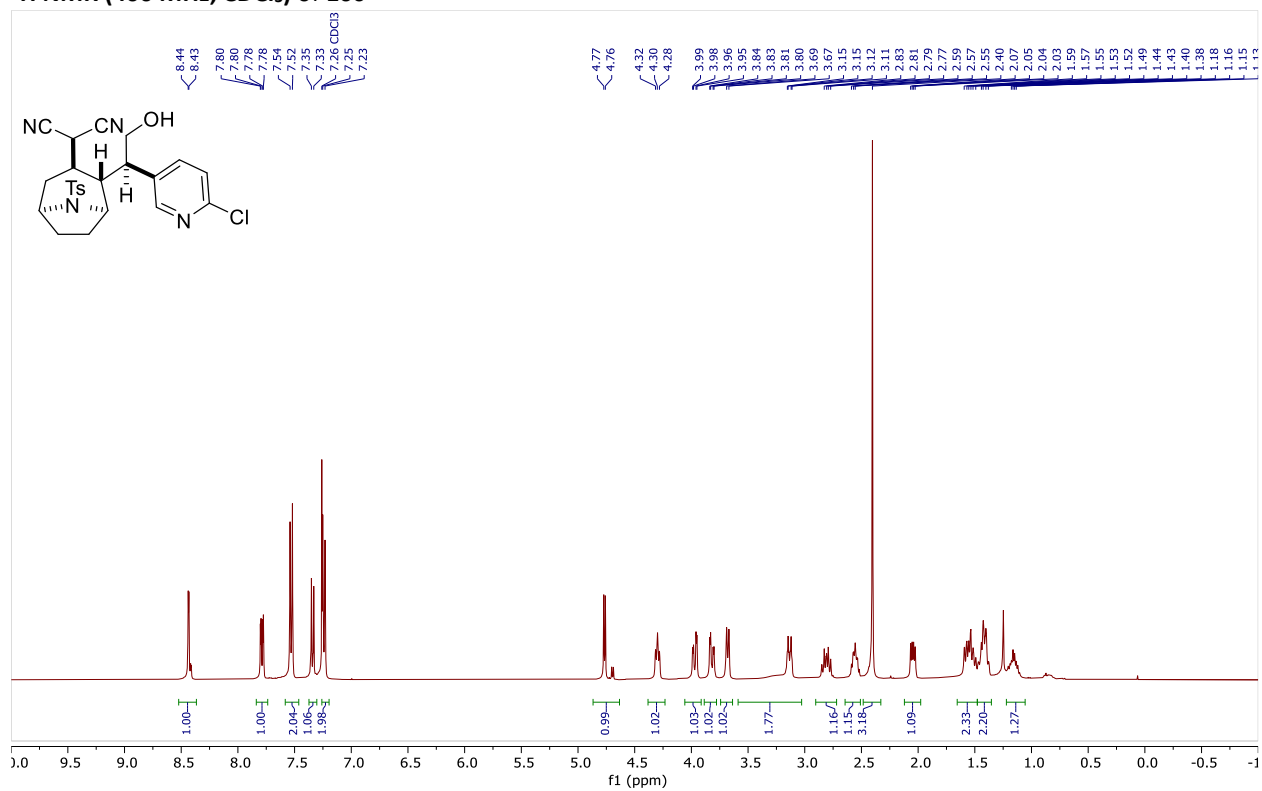

**<sup>13</sup>C NMR (101 MHz, CDCl<sub>3</sub>) of 10c**

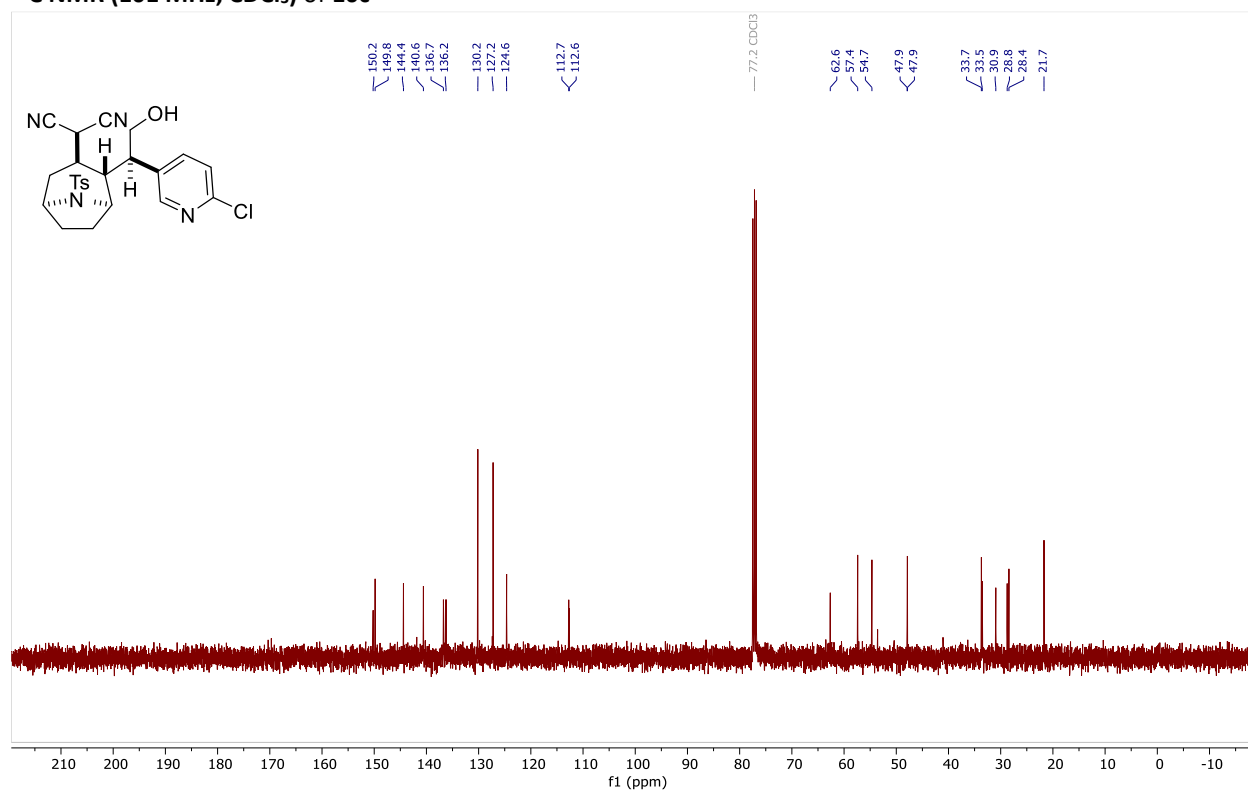

<sup>1</sup>H NMR (400 MHz, CD<sub>3</sub>CN) of 11a

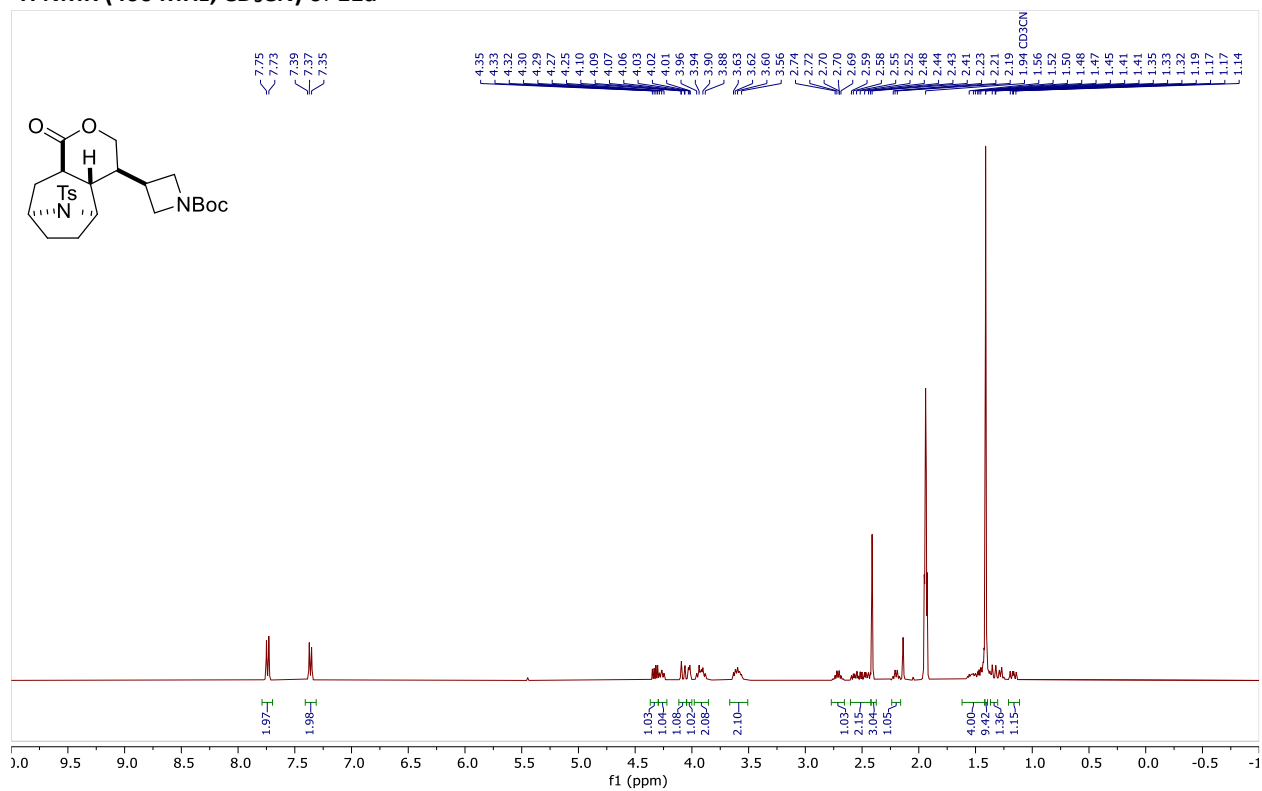

<sup>13</sup>C NMR (101 MHz, CD<sub>3</sub>CN) of 11a

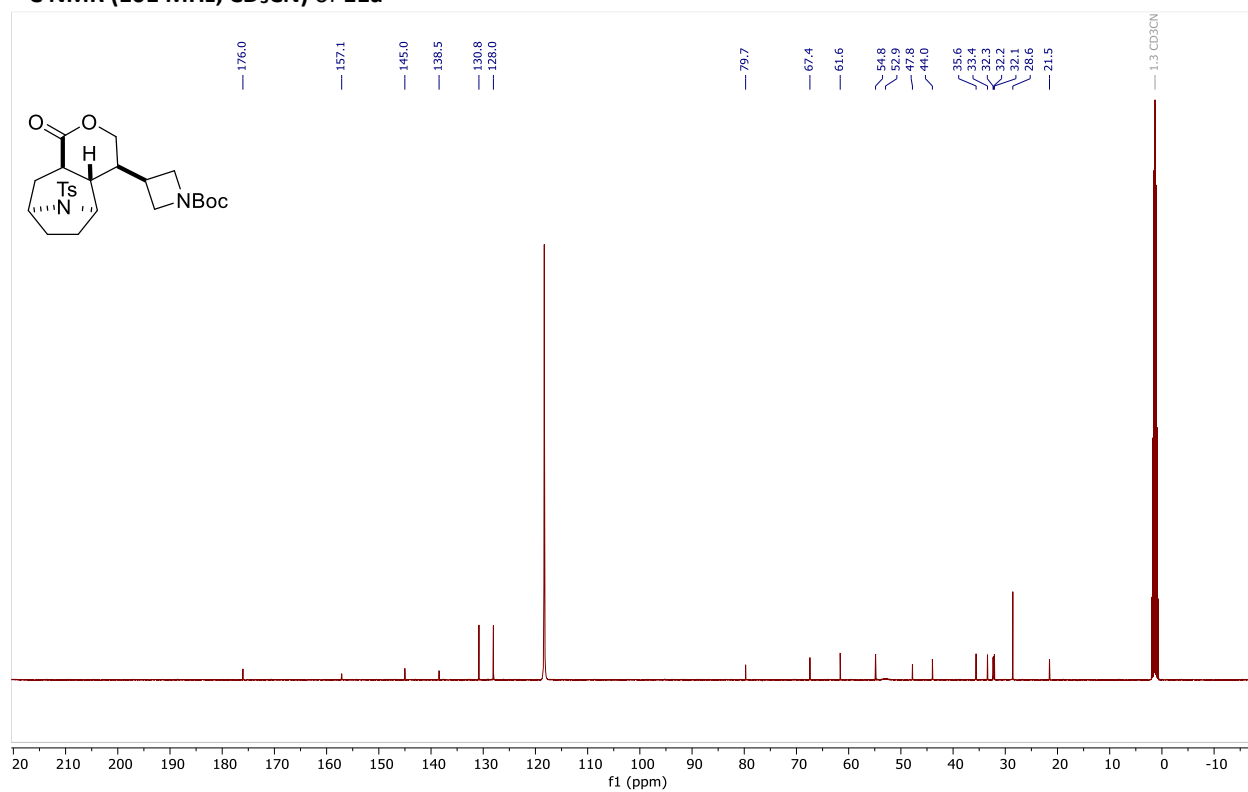

**<sup>1</sup>H NMR (400 MHz, CDCl<sub>3</sub>) of 11b**

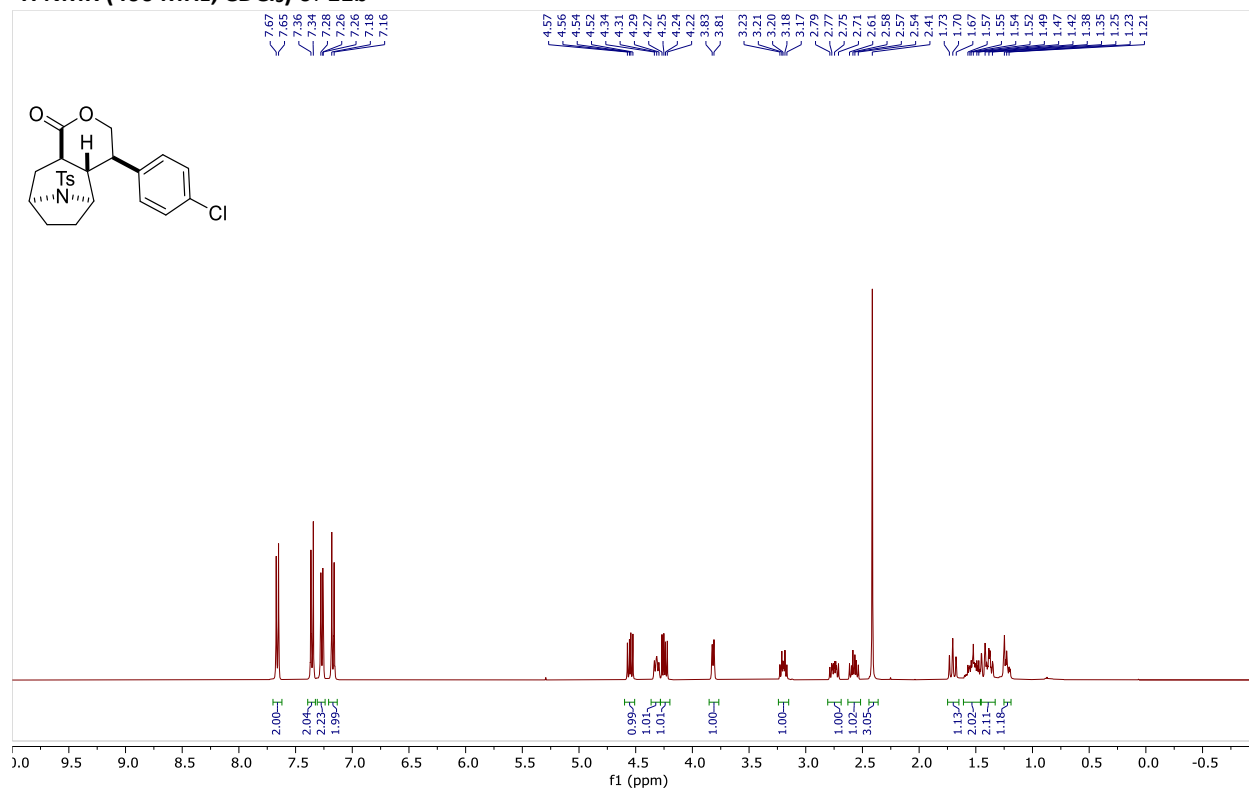

**<sup>13</sup>C NMR (151 MHz, CDCl<sub>3</sub>) of 11b**

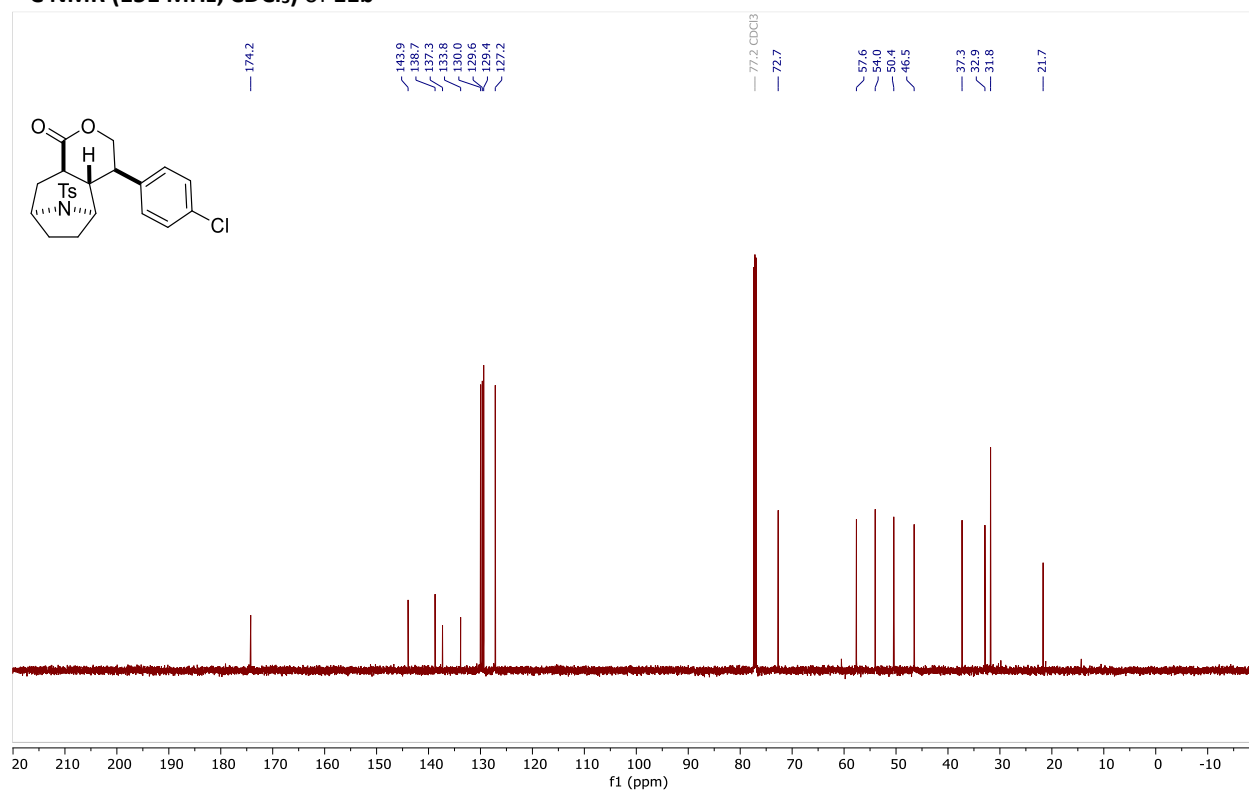

**<sup>1</sup>H NMR (400 MHz, CDCl<sub>3</sub>) of 11c**

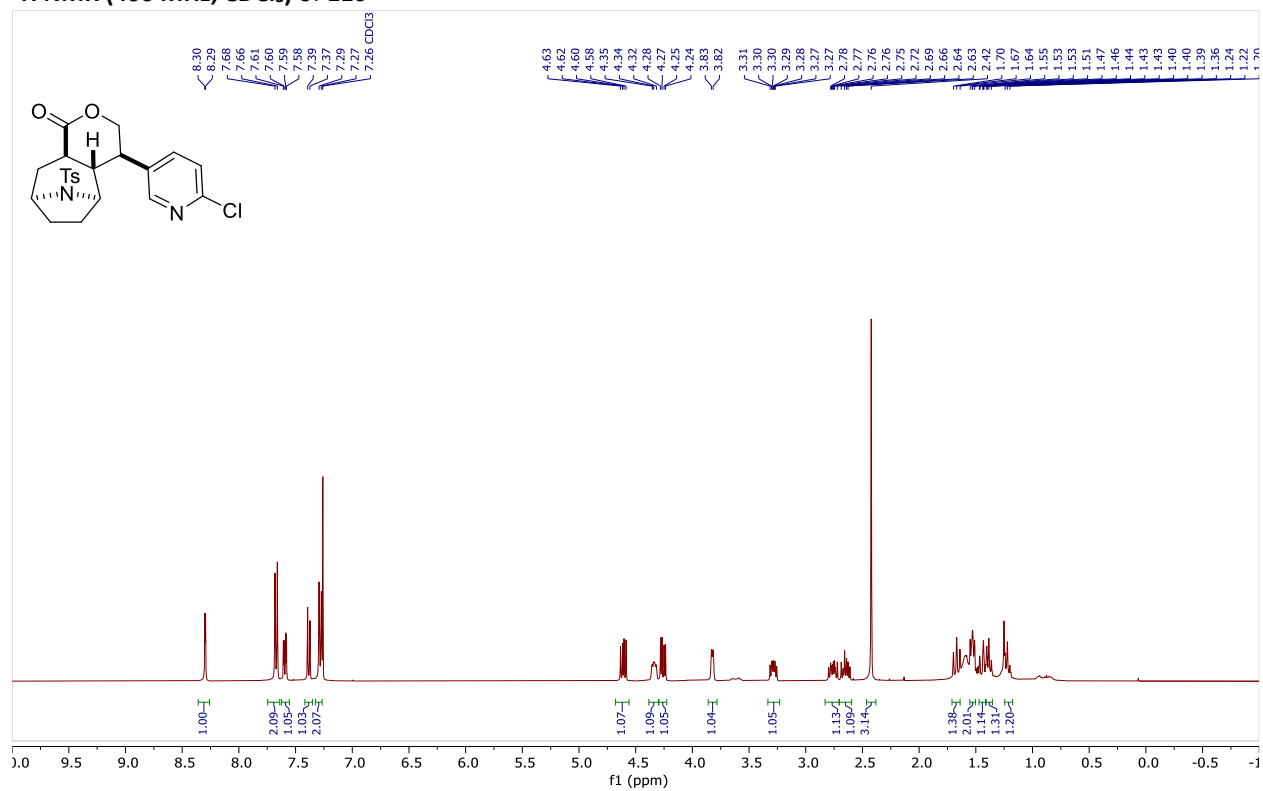

**<sup>13</sup>C NMR (101 MHz, CDCl<sub>3</sub>) of 11c**

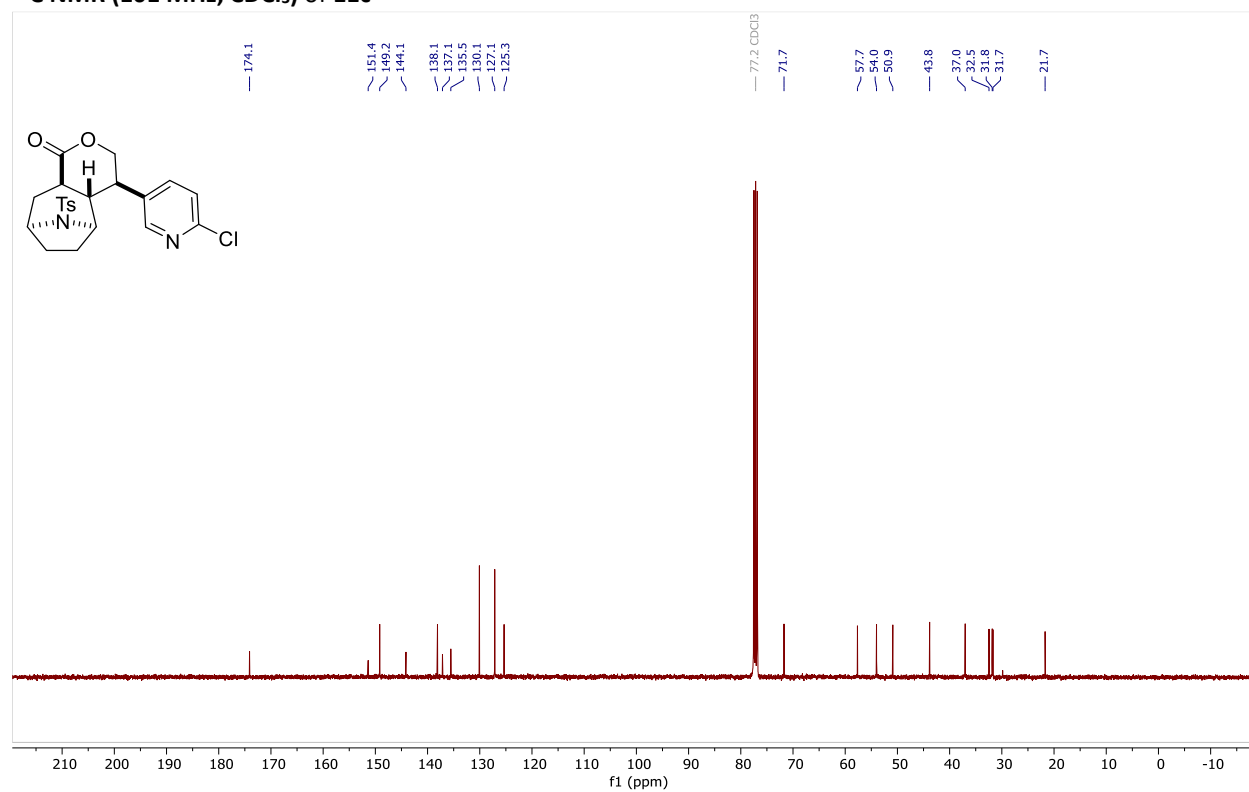

# HPLC data

## Compound 2a

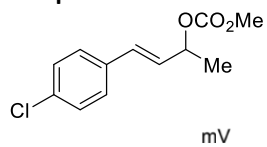

### Chiral-racemic

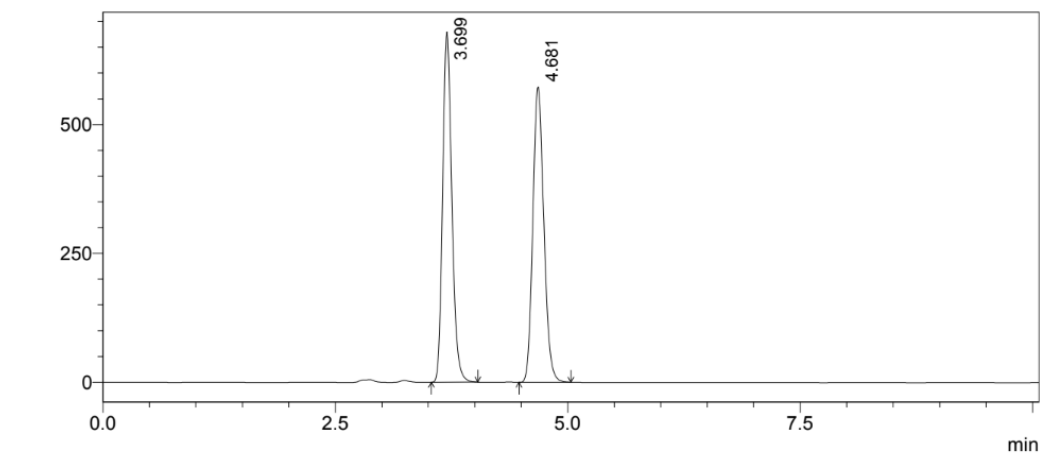

Detector A Channel 1 254nm

| Peak# | Ret. Time | Area%   |
|-------|-----------|---------|
| 1     | 3.699     | 50.069  |
| 2     | 4.681     | 49.931  |
| Total |           | 100.000 |

### Chiral non-racemic

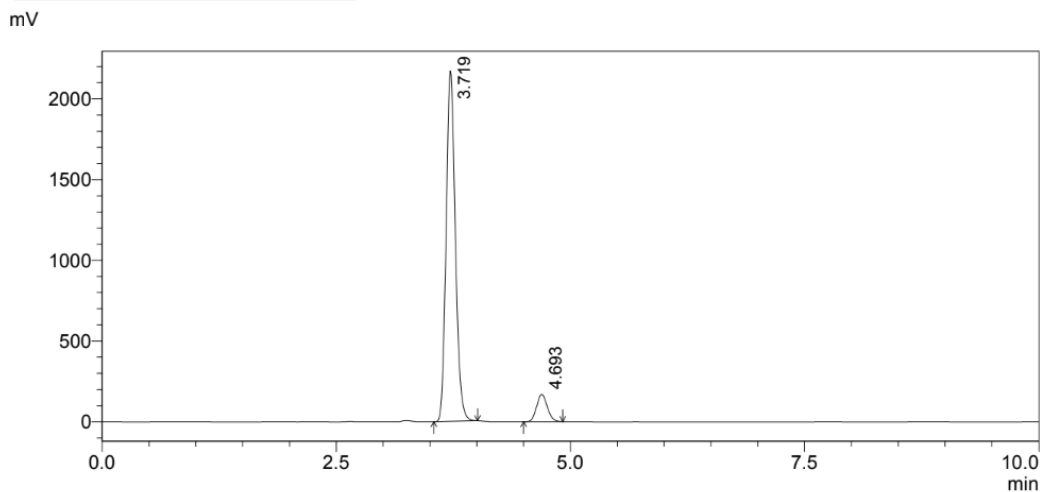

Detector A Channel 1 254nm

| Peak# | Ret. Time | Area%   |
|-------|-----------|---------|
| 1     | 3.719     | 91.733  |
| 2     | 4.693     | 8.267   |
| Total |           | 100.000 |

### Compound 4a

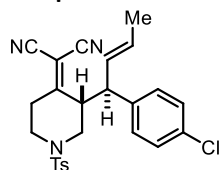

Chiral-racemic

mV

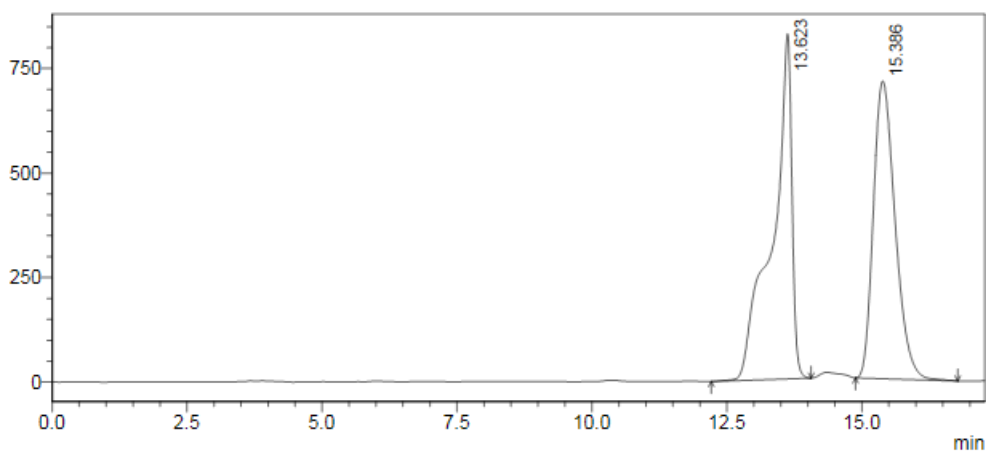

Detector A Channel 1 254nm

| Peak# | Ret. Time | Area%   |
|-------|-----------|---------|
| 1     | 13.623    | 50.740  |
| 2     | 15.386    | 49.260  |
| Total |           | 100.000 |

Chiral  
non-racemic  
using  
*rac-2a*

mV

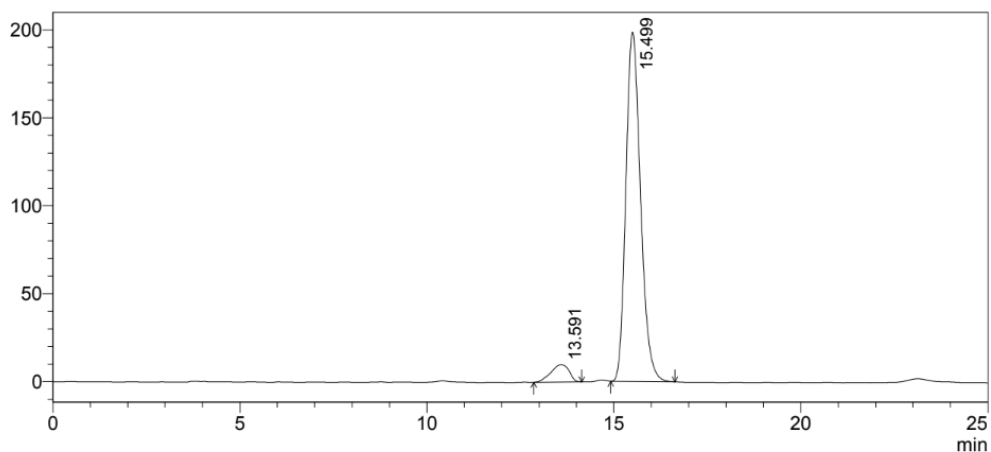

Detector A Channel 1 254nm

| Peak# | Ret. Time | Area%   |
|-------|-----------|---------|
| 1     | 13.591    | 5.817   |
| 2     | 15.499    | 94.183  |
| Total |           | 100.000 |

Chiral  
non-racemic  
using *rac*-2aAc  
and DIPEA

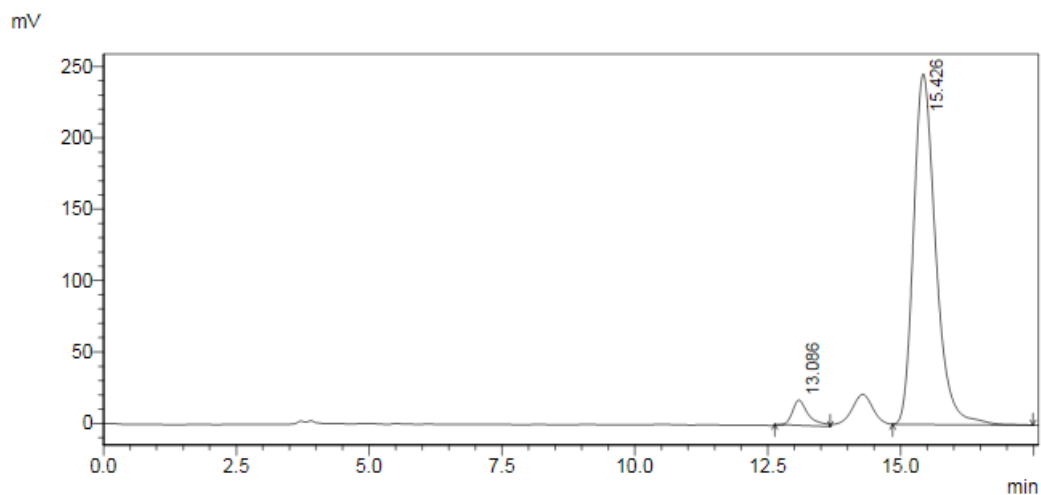

Detector A Channel 1 254nm

| Peak# | Ret. Time | Area%   |
|-------|-----------|---------|
| 1     | 13.086    | 4.881   |
| 2     | 15.426    | 95.119  |
| Total |           | 100.000 |

Chiral  
non-racemic  
using *rac*-2a-Ac  
and K<sub>3</sub>PO<sub>4</sub>

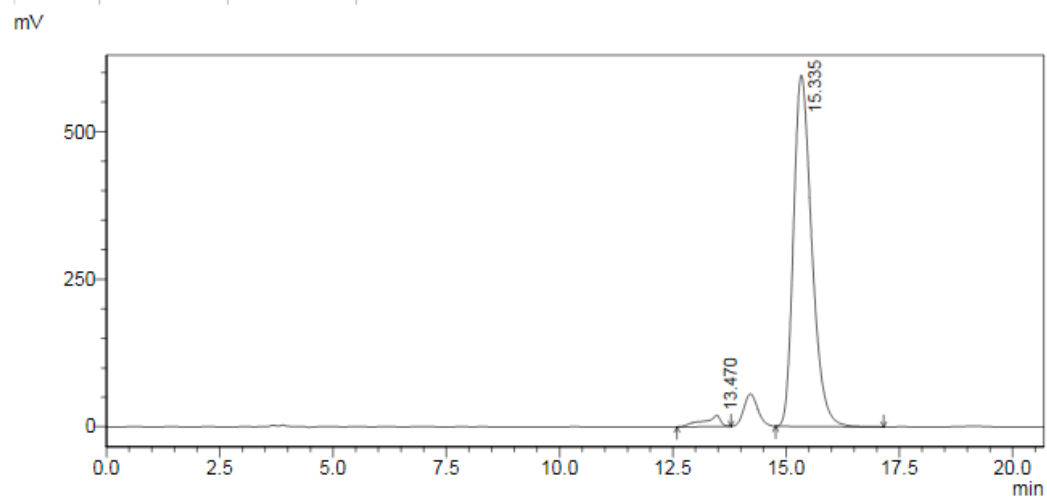

Detector A Channel 1 254nm

| Peak# | Ret. Time | Area%   |
|-------|-----------|---------|
| 1     | 13.470    | 2.902   |
| 2     | 15.335    | 97.098  |
| Total |           | 100.000 |

### Compound 4b

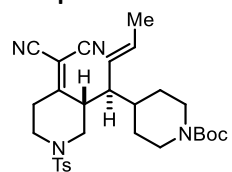

Chiral-racemic mV

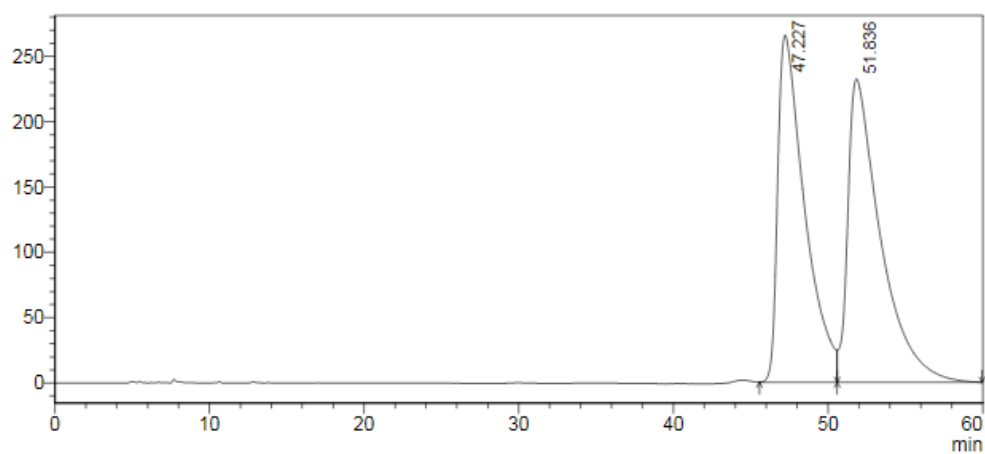

Detector A Channel 1 254nm

| Peak# | Ret. Time | Area%   |
|-------|-----------|---------|
| 1     | 47.227    | 48.445  |
| 2     | 51.836    | 51.555  |
| Total |           | 100.000 |

Chiral  
non-racemic

mV

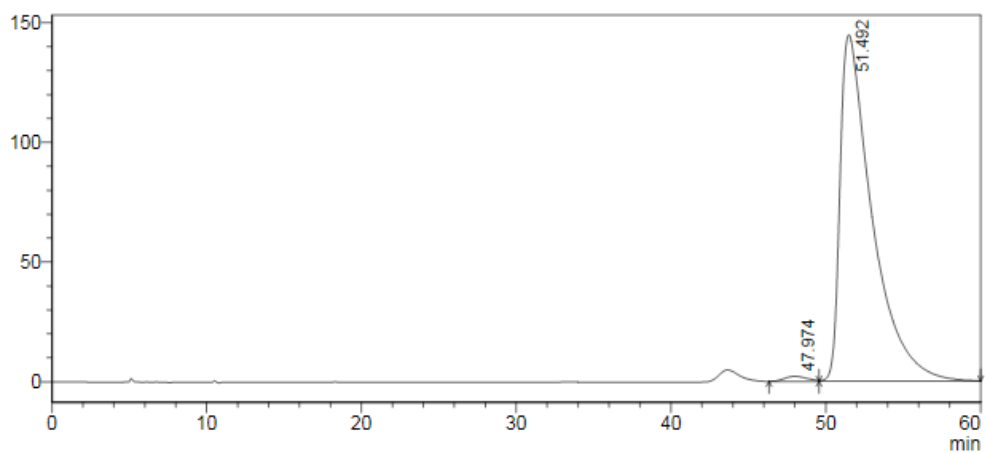

Detector A Channel 1 254nm

| Peak# | Ret. Time | Area%   |
|-------|-----------|---------|
| 1     | 47.974    | 1.023   |
| 2     | 51.492    | 98.977  |
| Total |           | 100.000 |



Chiral  
non-racemic,  
3 mmol scale

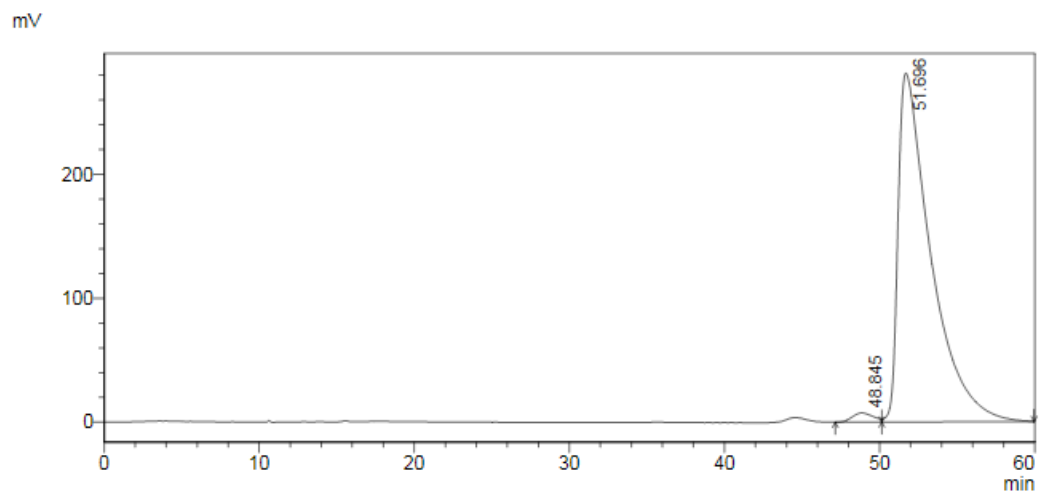

Detector A Channel 1 254nm

| Peak# | Ret. Time | Area%   |
|-------|-----------|---------|
| 1     | 48.845    | 1.665   |
| 2     | 51.696    | 98.335  |
| Total |           | 100.000 |

Chiral  
non-racemic,  
3 mmol scale,  
0.5 mol% Pd

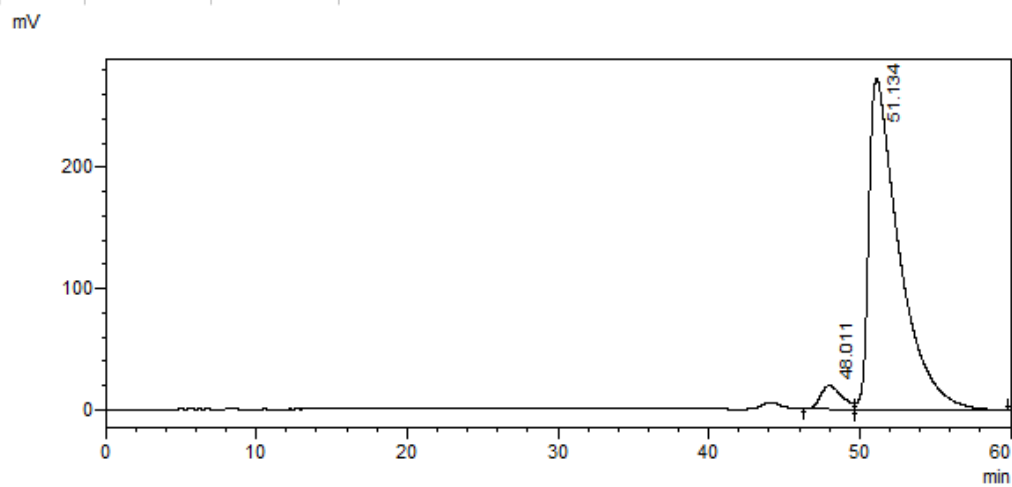

Detector A Channel 1 254nm

| Peak# | Ret. Time | Area%   |
|-------|-----------|---------|
| 1     | 48.011    | 4.805   |
| 2     | 51.134    | 95.195  |
| Total |           | 100.000 |

**Compound 4c**

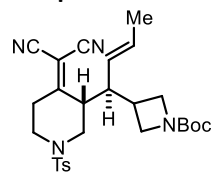

Chiral-racemic

mV

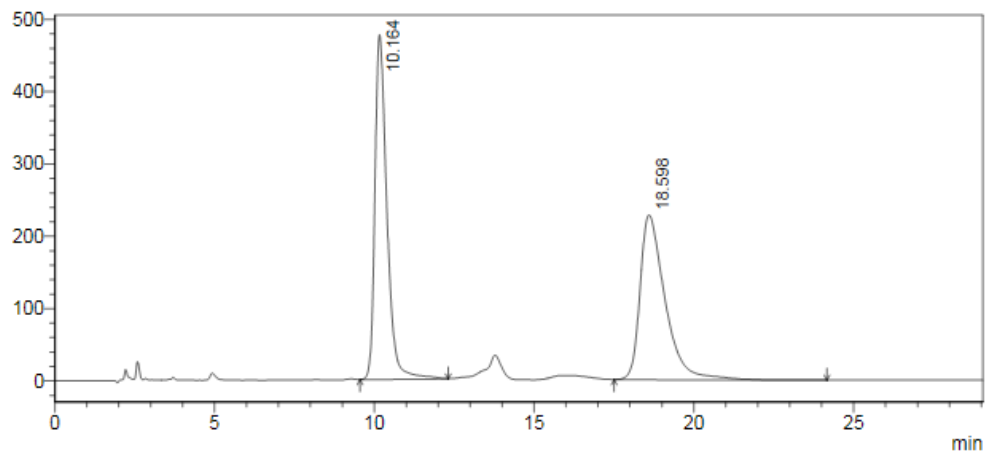

Detector A Channel 1 254nm

| Peak# | Ret. Time | Area%   |
|-------|-----------|---------|
| 1     | 10.164    | 50.132  |
| 2     | 18.598    | 49.868  |
| Total |           | 100.000 |

Chiral  
non-racemic

mV

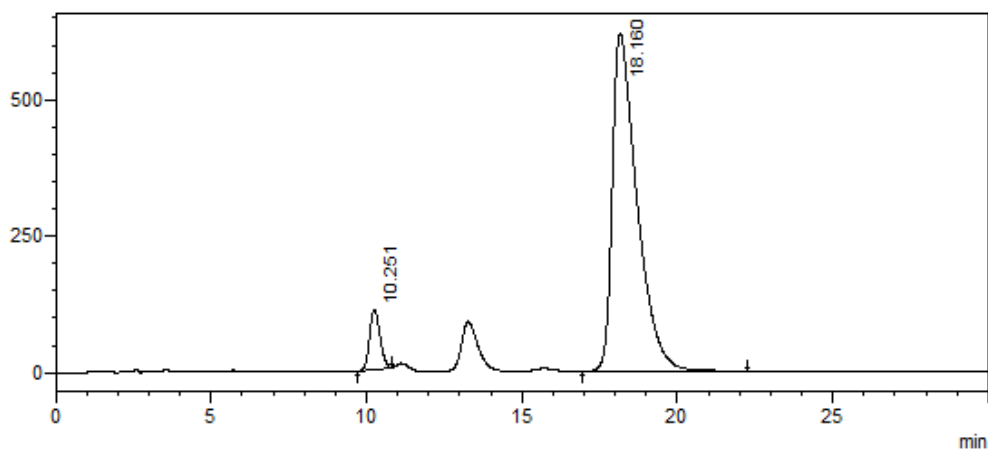

Detector A Channel 1 254nm

| Peak# | Ret. Time | Area%   |
|-------|-----------|---------|
| 1     | 10.251    | 6.998   |
| 2     | 18.160    | 93.002  |
| Total |           | 100.000 |

**Compound 4d**

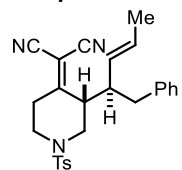

Chiral-racemic

mV

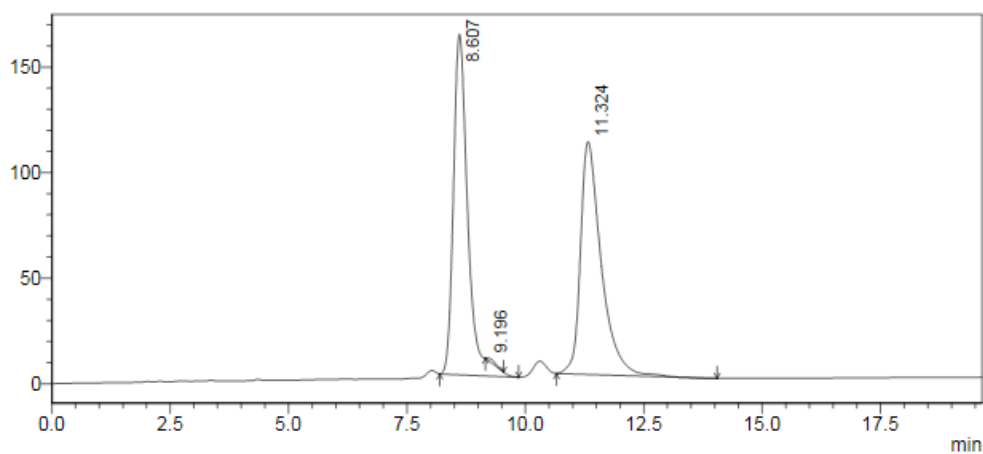

Detector A Channel 1 254nm

| Peak# | Ret. Time | Area%   |
|-------|-----------|---------|
| 1     | 8.607     | 50.207  |
| 2     | 9.196     | 0.252   |
| 3     | 11.324    | 49.540  |
| Total |           | 100.000 |

Chiral  
non-racemic

mV

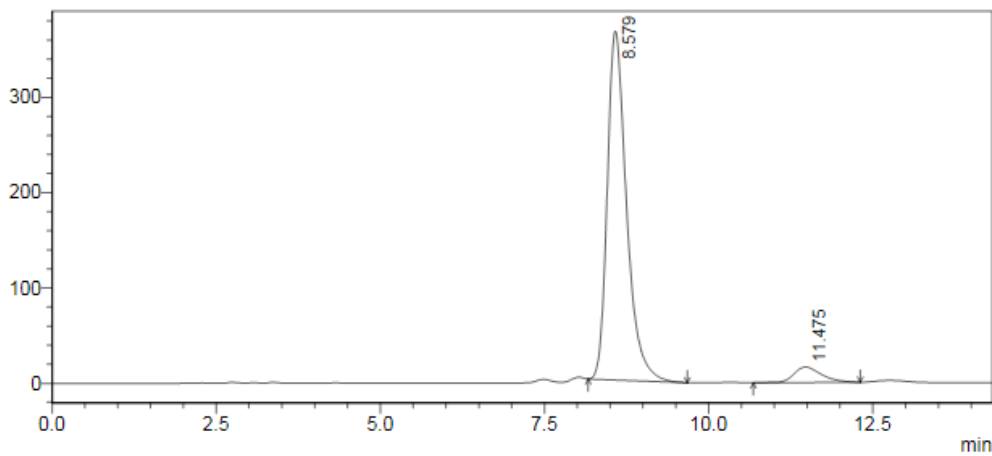

Detector A Channel 1 254nm

| Peak# | Ret. Time | Area%   |
|-------|-----------|---------|
| 1     | 8.579     | 94.029  |
| 2     | 11.475    | 5.971   |
| Total |           | 100.000 |

### Compound 4e

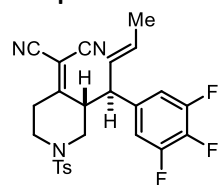

Chiral-racemic mV

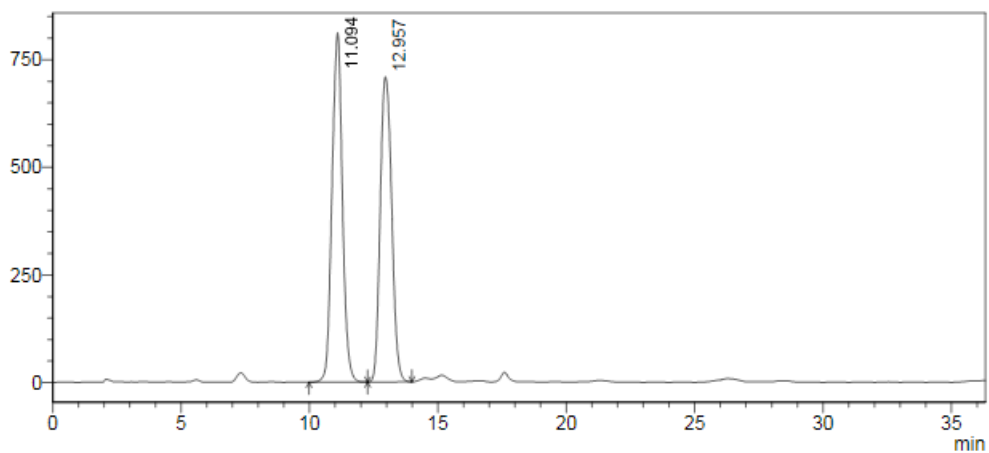

Detector A Channel 1 254nm

| Peak# | Ret. Time | Area%   |
|-------|-----------|---------|
| 1     | 11.094    | 50.947  |
| 2     | 12.957    | 49.053  |
| Total |           | 100.000 |

Chiral non-racemic

mV

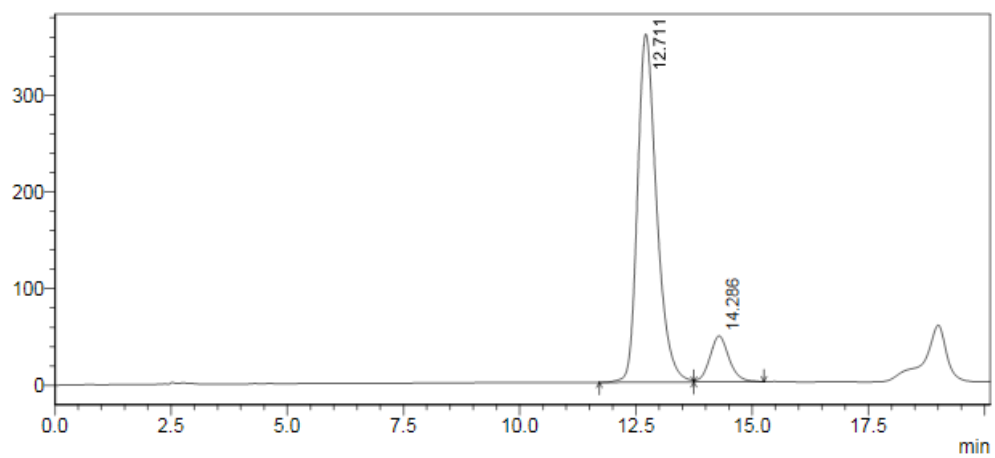

Detector A Channel 1 254nm

| Peak# | Ret. Time | Area%   |
|-------|-----------|---------|
| 1     | 12.711    | 88.320  |
| 2     | 14.286    | 11.680  |
| Total |           | 100.000 |

**Compound 4f**

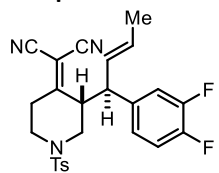

mV

Chiral-racemic

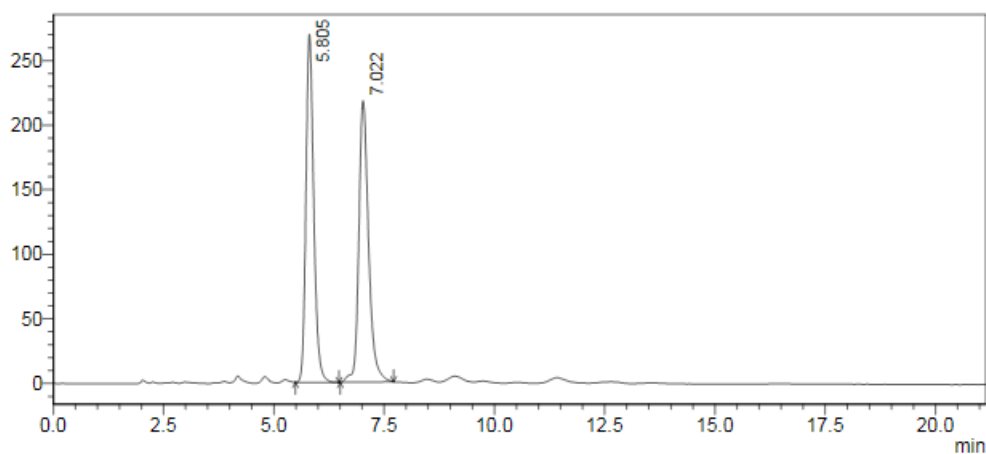

Detector A Channel 1 254nm

| Peak# | Ret. Time | Area%   |
|-------|-----------|---------|
| 1     | 5.805     | 49.648  |
| 2     | 7.022     | 50.352  |
| Total |           | 100.000 |

mV

Chiral  
non-racemic

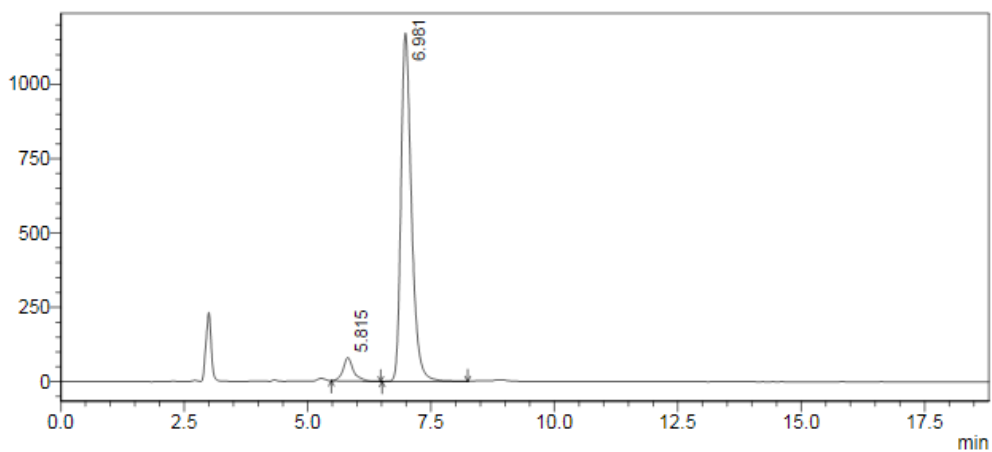

Detector A Channel 1 254nm

| Peak# | Ret. Time | Area%   |
|-------|-----------|---------|
| 1     | 5.815     | 6.286   |
| 2     | 6.981     | 93.714  |
| Total |           | 100.000 |

### Compound 4g

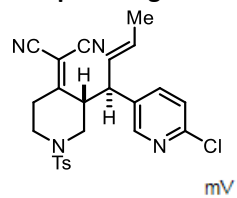

Chiral-racemic

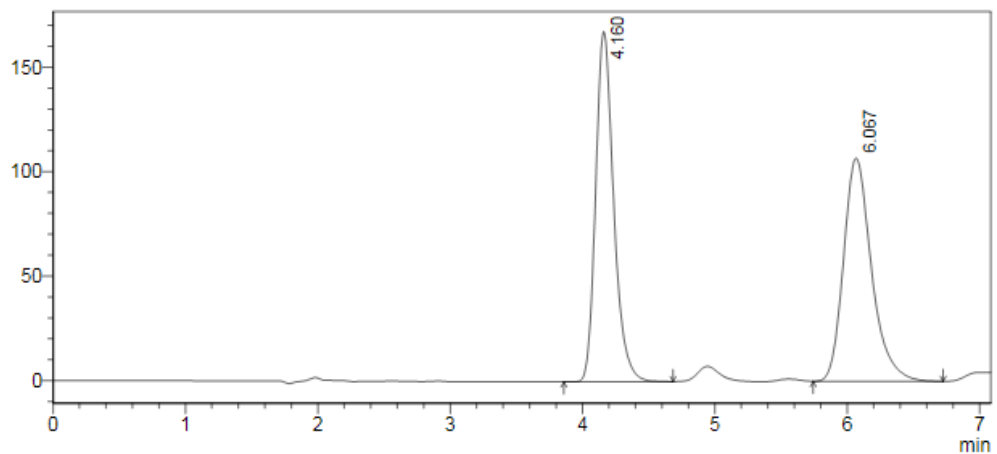

Detector A Channel 1 254nm

| Peak# | Ret. Time | Area%   |
|-------|-----------|---------|
| 1     | 4.160     | 50.196  |
| 2     | 6.067     | 49.804  |
| Total |           | 100.000 |

mV

Chiral  
non-racemic

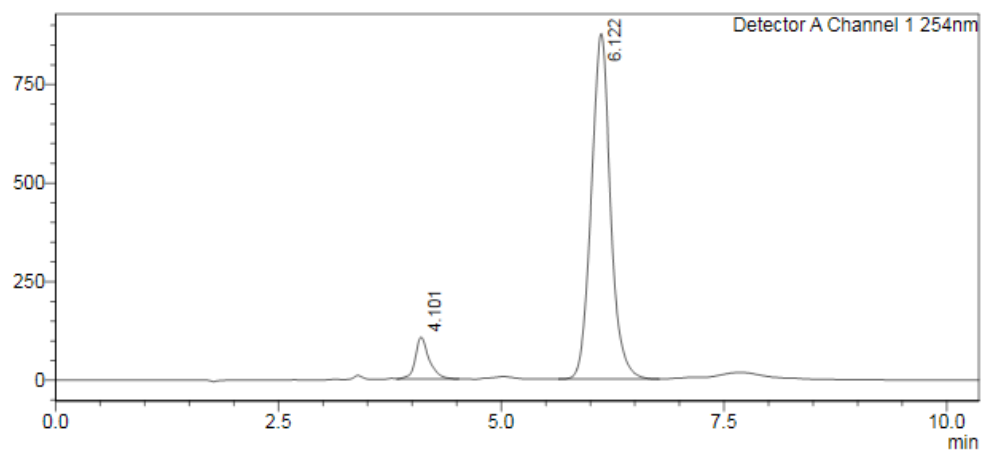

### Compound 4h

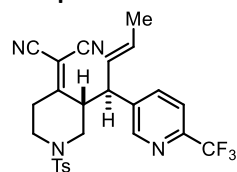

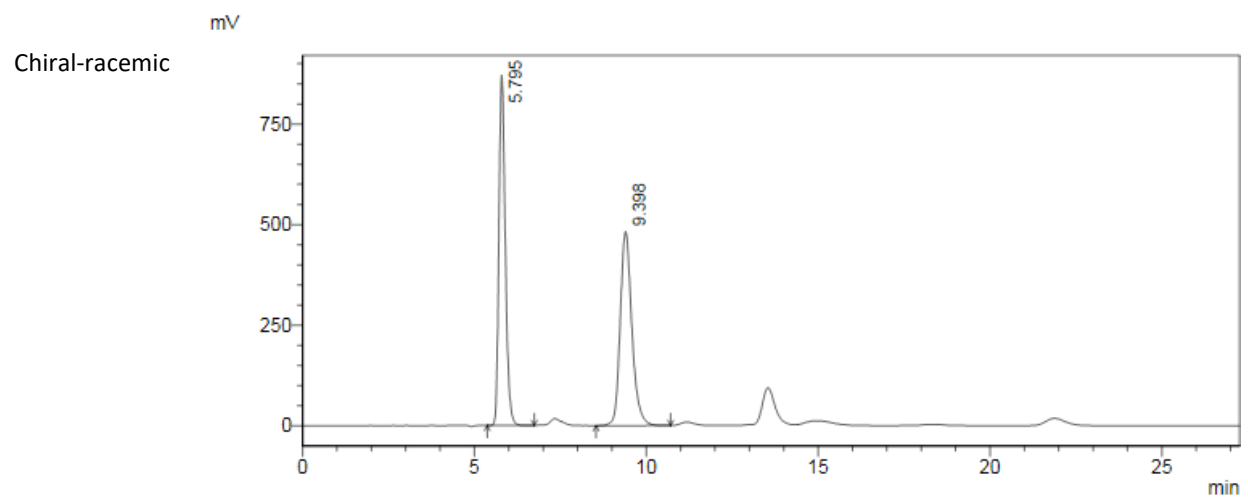

Detector A Channel 1 254nm

| Peak# | Ret. Time | Area%   |
|-------|-----------|---------|
| 1     | 5.795     | 49.846  |
| 2     | 9.398     | 50.154  |
| Total |           | 100.000 |

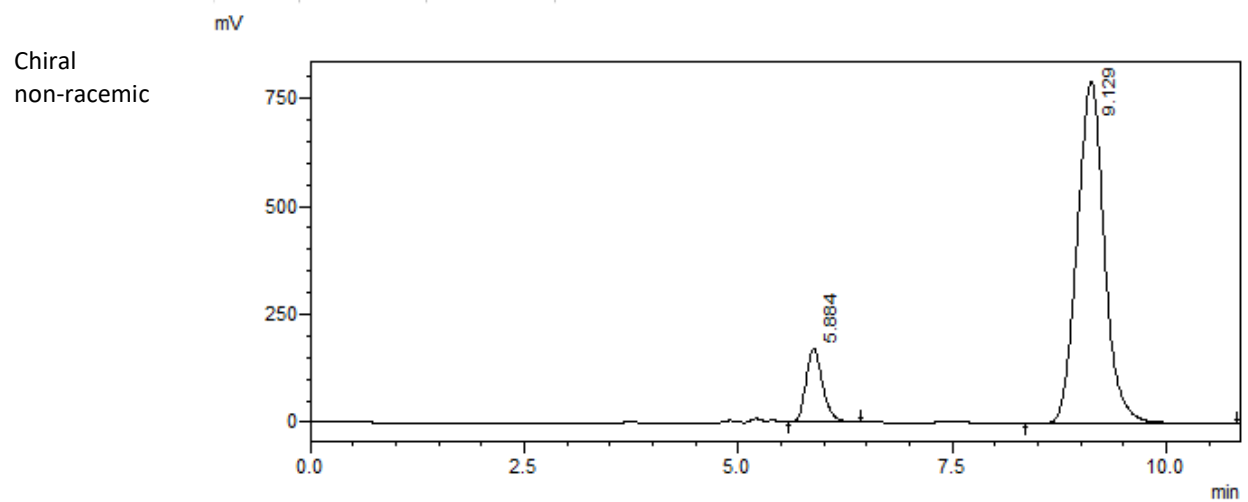

Detector A Channel 1 254nm

| Peak# | Ret. Time | Area%   |
|-------|-----------|---------|
| 1     | 5.884     | 11.683  |
| 2     | 9.129     | 88.317  |
| Total |           | 100.000 |

**Compound 4i**

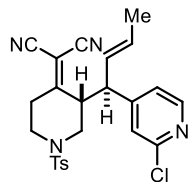

Chiral-racemic mV

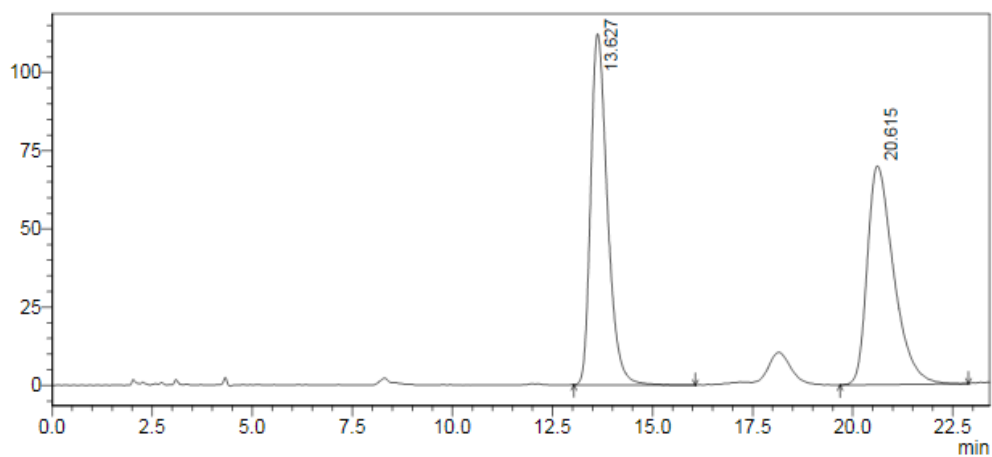

Detector A Channel 1 254nm

| Peak# | Ret. Time | Area%   |
|-------|-----------|---------|
| 1     | 13.627    | 50.400  |
| 2     | 20.615    | 49.600  |
| Total |           | 100.000 |

Chiral  
non-racemic  
using *rac-2a* mV

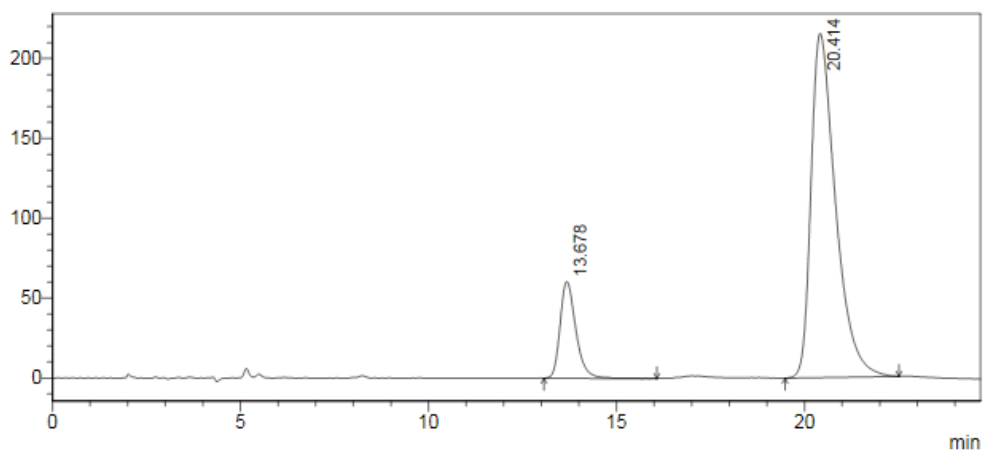

Detector A Channel 1 254nm

| Peak# | Ret. Time | Area%   |
|-------|-----------|---------|
| 1     | 13.678    | 15.230  |
| 2     | 20.414    | 84.770  |
| Total |           | 100.000 |



Chiral  
non-racemic  
using *rac-2a-Ac*

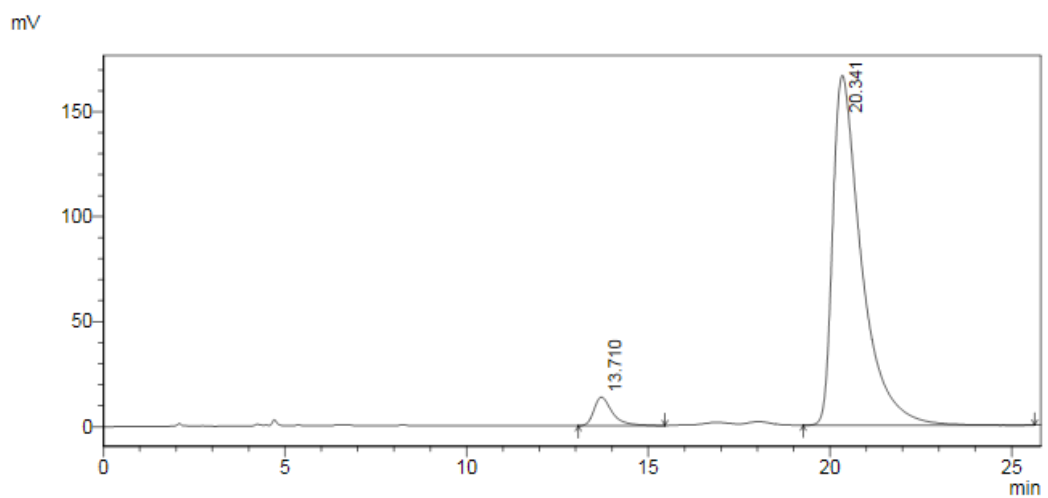

Detector A Channel 1 254nm

| Peak# | Ret. Time | Area%   |
|-------|-----------|---------|
| 1     | 13.710    | 4.901   |
| 2     | 20.341    | 95.099  |
| Total |           | 100.000 |

**Compound 4j**

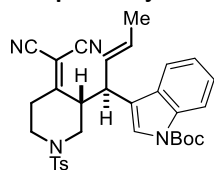

Chiral-racemic

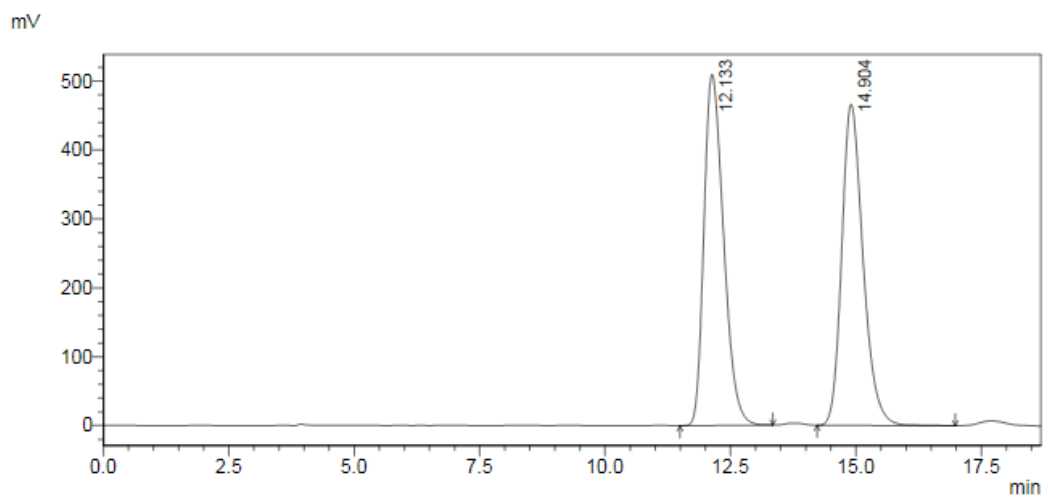

Detector A Channel 1 254nm

| Peak# | Ret. Time | Area%   |
|-------|-----------|---------|
| 1     | 12.133    | 50.150  |
| 2     | 14.904    | 49.850  |
| Total |           | 100.000 |

Chiral  
non-racemic

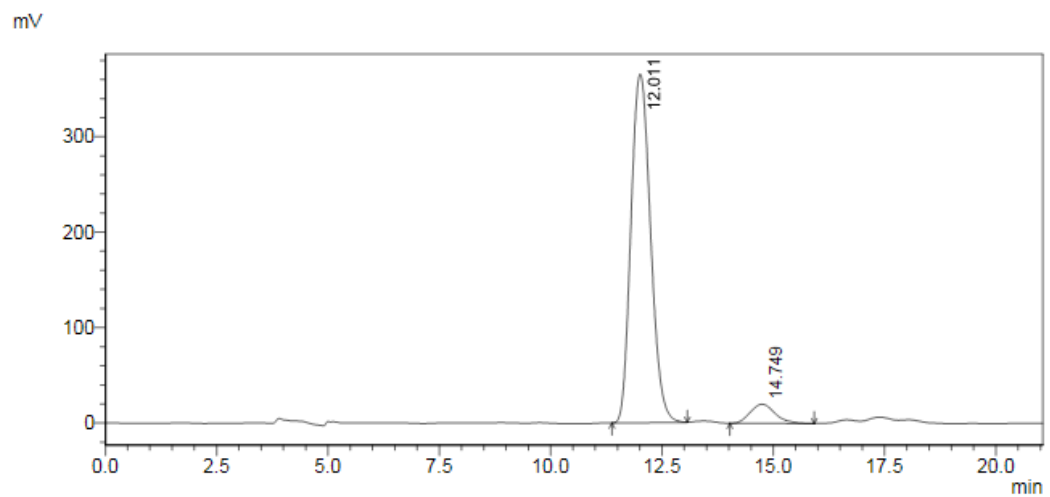

Detector A Channel 1 254nm

| Peak# | Ret. Time | Area%   |
|-------|-----------|---------|
| 1     | 12.011    | 93.434  |
| 2     | 14.749    | 6.566   |
| Total |           | 100.000 |

**Compound 4k**

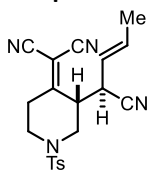

Chiral-racemic

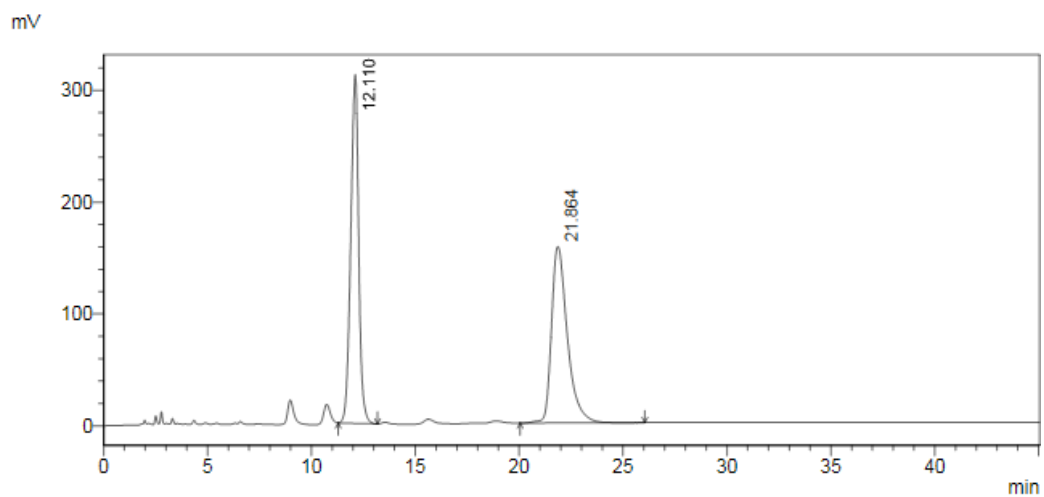

Detector A Channel 1 254nm

| Peak# | Ret. Time | Area%   |
|-------|-----------|---------|
| 1     | 12.110    | 49.865  |
| 2     | 21.864    | 50.135  |
| Total |           | 100.000 |

Chiral  
non-racemic

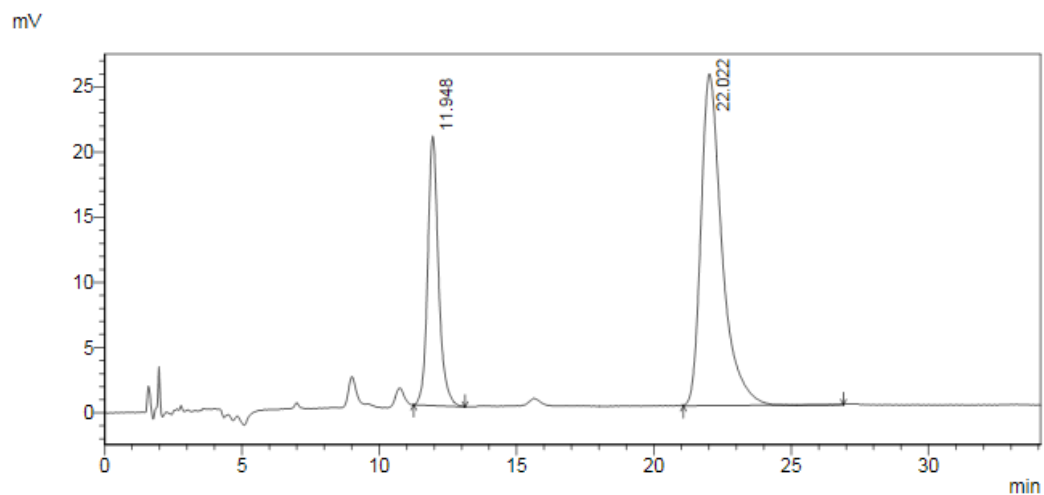

Detector A Channel 1 254nm

| Peak# | Ret. Time | Area%   |
|-------|-----------|---------|
| 1     | 11.948    | 29.535  |
| 2     | 22.022    | 70.465  |
| Total |           | 100.000 |

**Compound 4I**

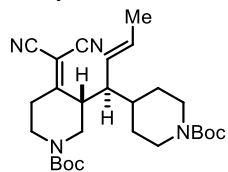

Chiral-racemic

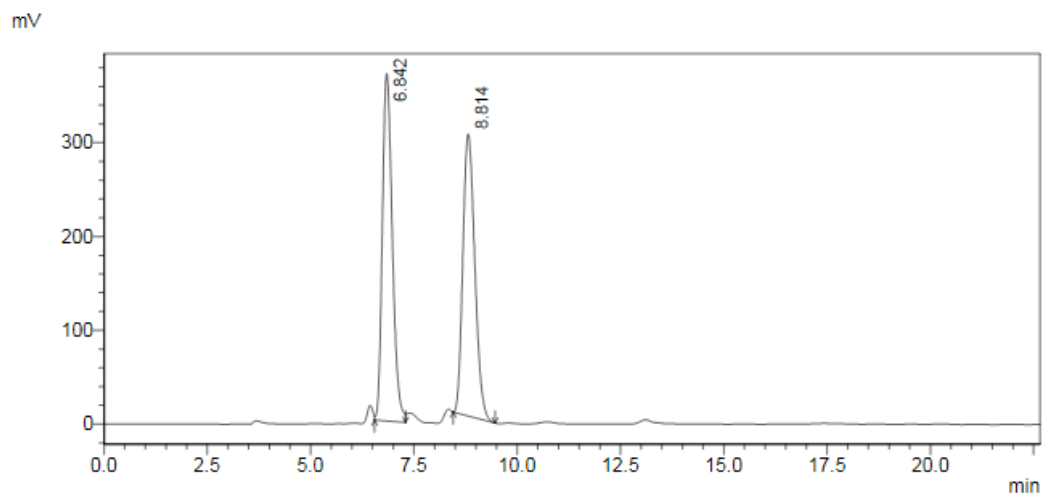

Detector A Channel 1 254nm

| Peak# | Ret. Time | Area%   |
|-------|-----------|---------|
| 1     | 6.842     | 50.829  |
| 2     | 8.814     | 49.171  |
| Total |           | 100.000 |

Chiral  
non-racemic

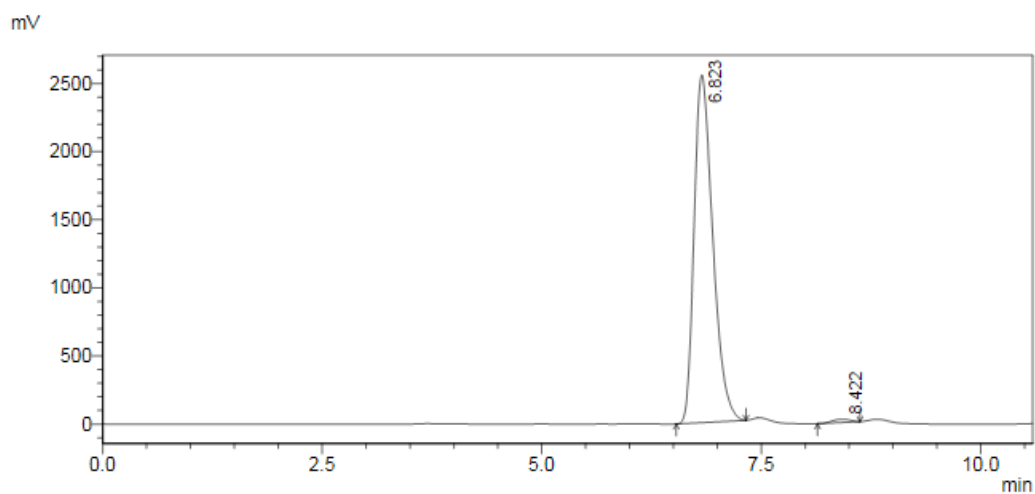

Detector A Channel 1 254nm

| Peak# | Ret. Time | Area%   |
|-------|-----------|---------|
| 1     | 6.823     | 99.099  |
| 2     | 8.422     | 0.901   |
| Total |           | 100.000 |

**Compound 4m**

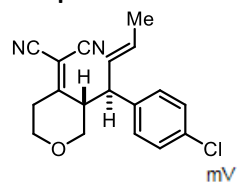

Chiral-racemic

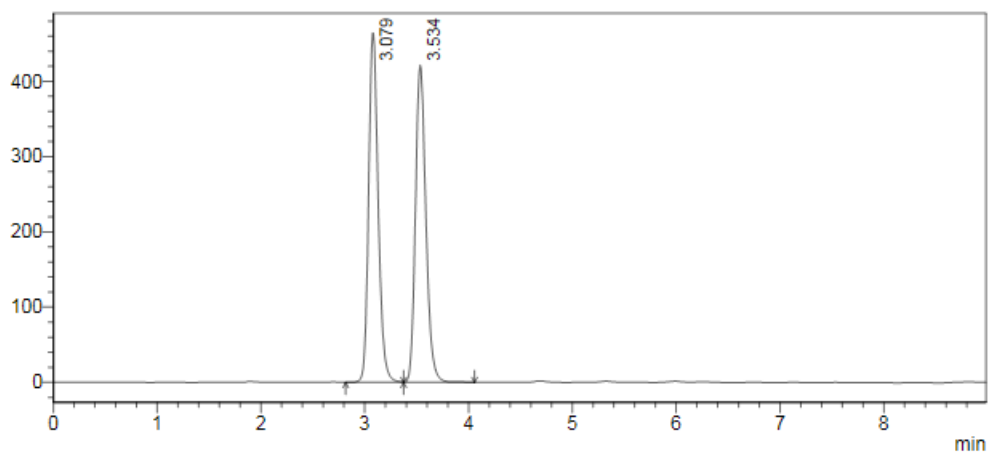

Detector A Channel 1 254nm

| Peak# | Ret. Time | Area%   |
|-------|-----------|---------|
| 1     | 3.079     | 50.248  |
| 2     | 3.534     | 49.752  |
| Total |           | 100.000 |

Chiral  
non-racemic

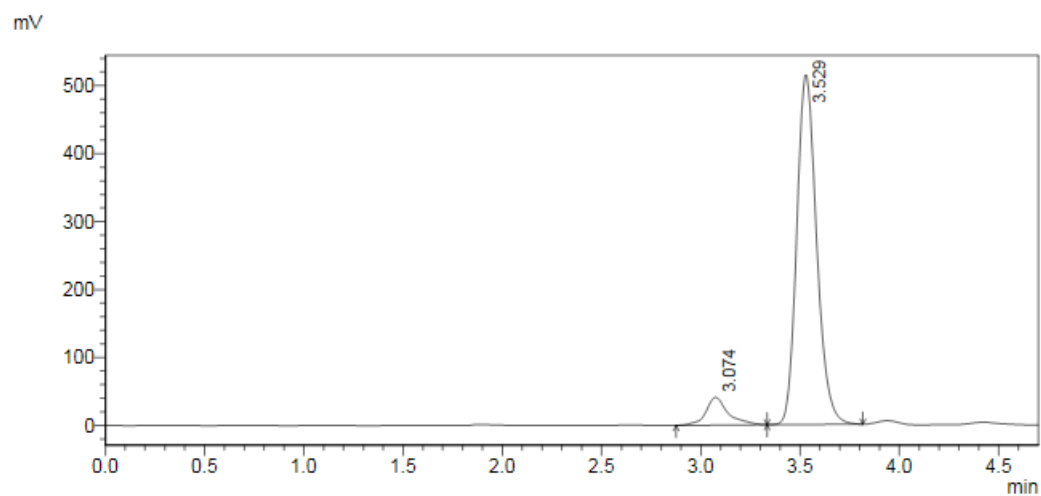

Detector A Channel 1 254nm

| Peak# | Ret. Time | Area%   |
|-------|-----------|---------|
| 1     | 3.074     | 8.144   |
| 2     | 3.529     | 91.856  |
| Total |           | 100.000 |

**Compound 4n**

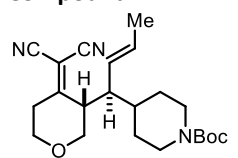

Chiral-racemic

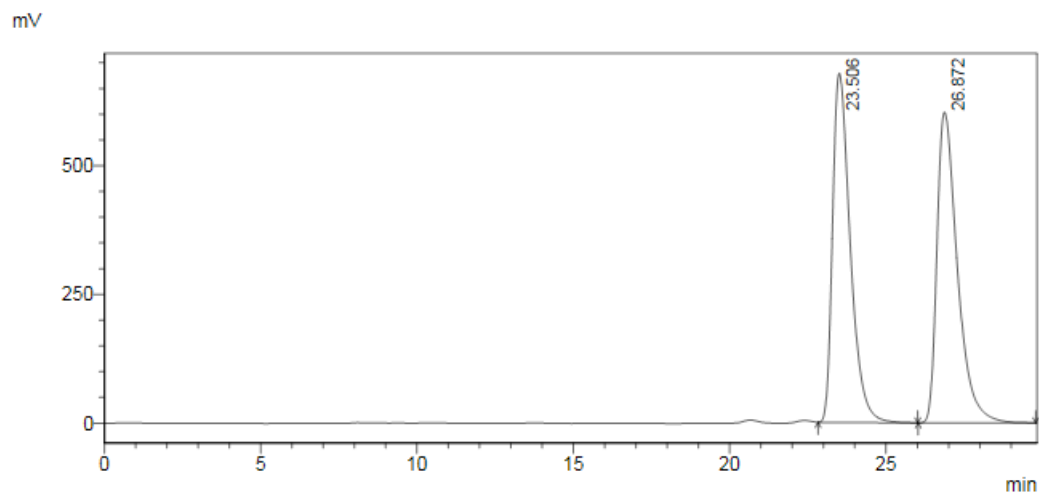

Detector A Channel 1 254nm

| Peak# | Ret. Time | Area%   |
|-------|-----------|---------|
| 1     | 23.506    | 49.307  |
| 2     | 26.872    | 50.693  |
| Total |           | 100.000 |

Chiral  
non-racemic

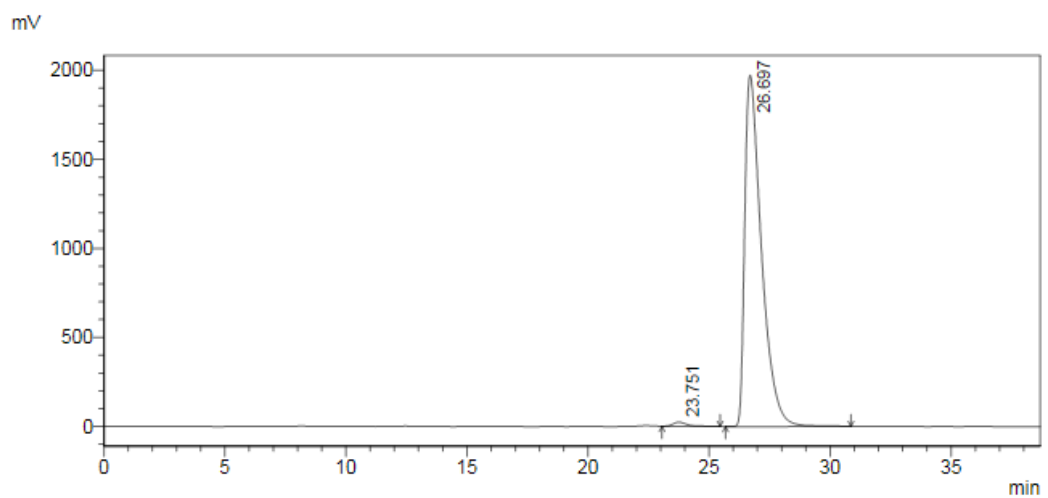

Detector A Channel 1 254nm

| Peak# | Ret. Time | Area%   |
|-------|-----------|---------|
| 1     | 23.751    | 0.979   |
| 2     | 26.697    | 99.021  |
| Total |           | 100.000 |

**Compound 4o**

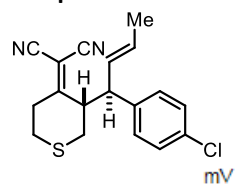

Chiral-racemic

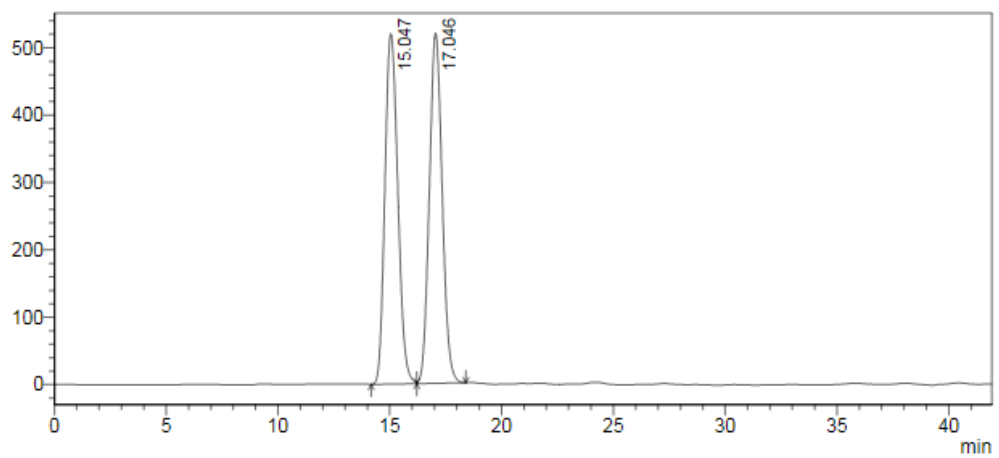

Detector A Channel 1 254nm

| Peak# | Ret. Time | Area%   |
|-------|-----------|---------|
| 1     | 15.047    | 50.129  |
| 2     | 17.046    | 49.871  |
| Total |           | 100.000 |

Chiral  
non-racemic

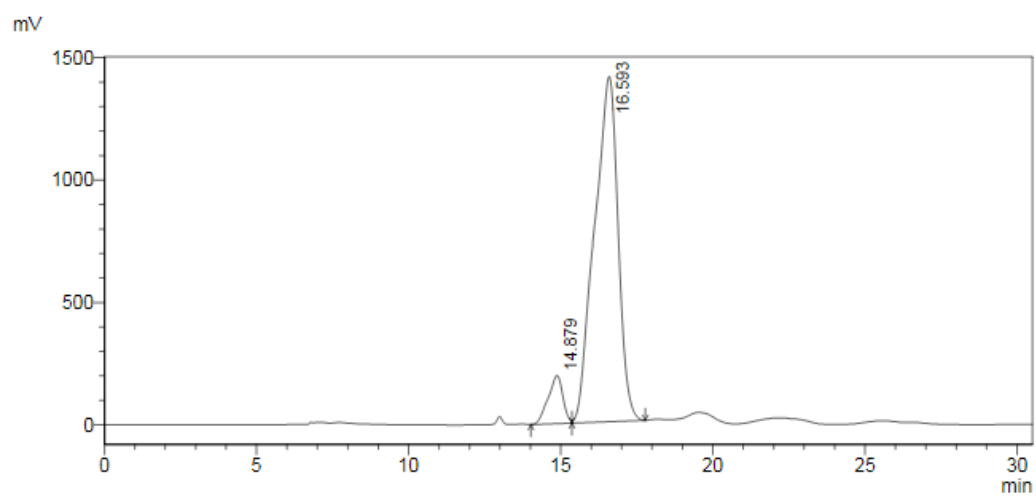

Detector A Channel 1 254nm

| Peak# | Ret. Time | Area%   |
|-------|-----------|---------|
| 1     | 14.879    | 7.991   |
| 2     | 16.593    | 92.009  |
| Total |           | 100.000 |

**Compound 4p**

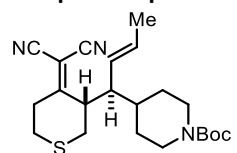

Chiral-racemic

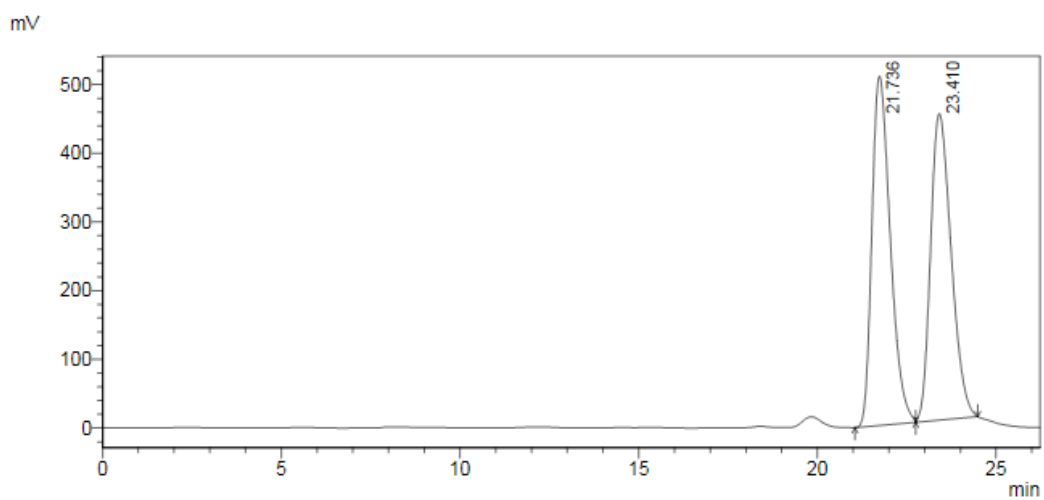

Detector A Channel 1 254nm

| Peak# | Ret. Time | Area%   |
|-------|-----------|---------|
| 1     | 21.736    | 50.451  |
| 2     | 23.410    | 49.549  |
| Total |           | 100.000 |

Chiral  
non-racemic

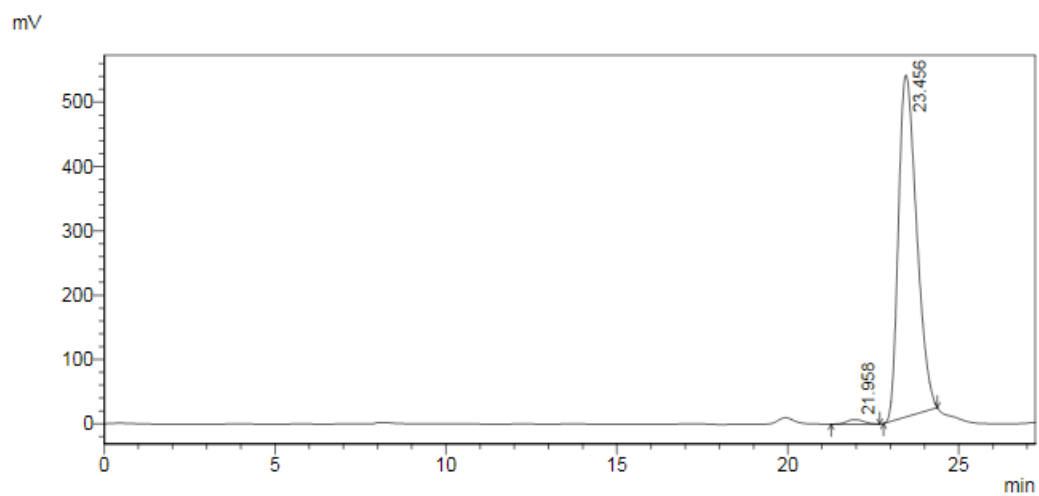

| Detector A Channel 1 254nm |           |         |
|----------------------------|-----------|---------|
| Peak#                      | Ret. Time | Area%   |
| 1                          | 21.958    | 1.230   |
| 2                          | 23.456    | 98.770  |
| Total                      |           | 100.000 |

**Compound 4q**

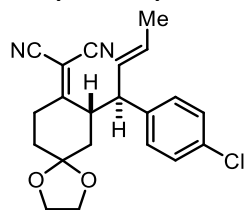

Chiral-racemic

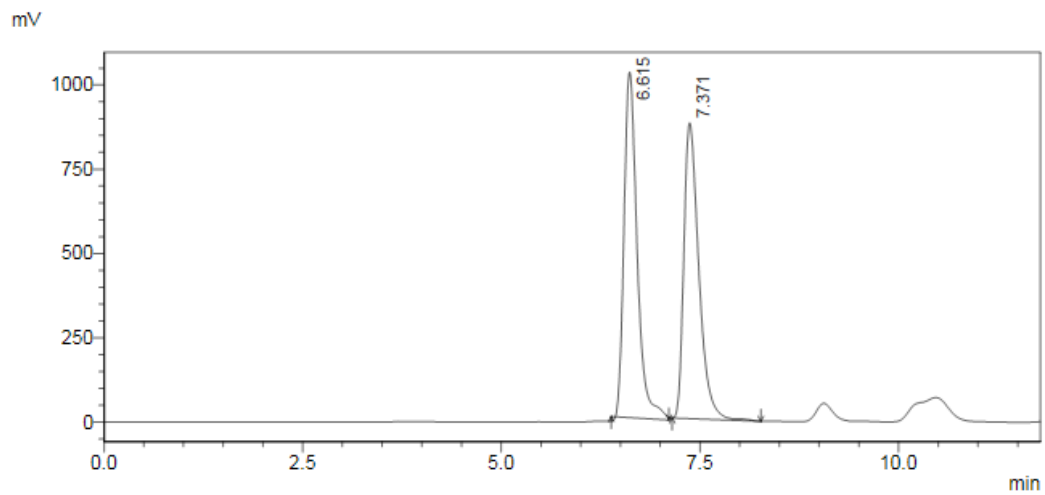

| Detector A Channel 1 254nm |           |         |
|----------------------------|-----------|---------|
| Peak#                      | Ret. Time | Area%   |
| 1                          | 6.615     | 50.524  |
| 2                          | 7.371     | 49.476  |
| Total                      |           | 100.000 |



Chiral  
non-racemic

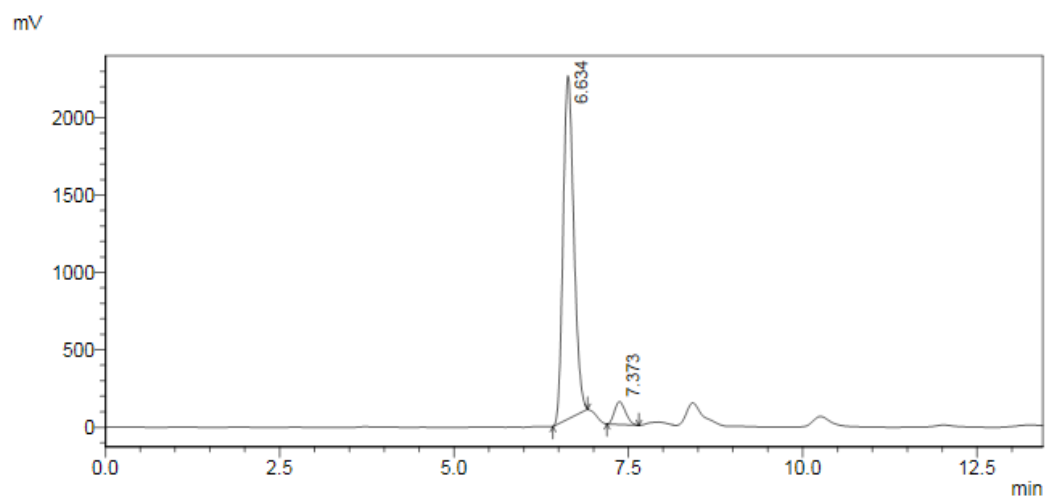

Detector A Channel 1 254nm

| Peak# | Ret. Time | Area%   |
|-------|-----------|---------|
| 1     | 6.634     | 93.586  |
| 2     | 7.373     | 6.414   |
| Total |           | 100.000 |

Compound 4r

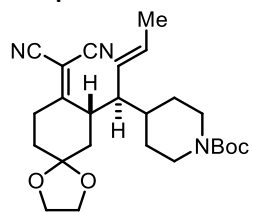

Chiral-racemic

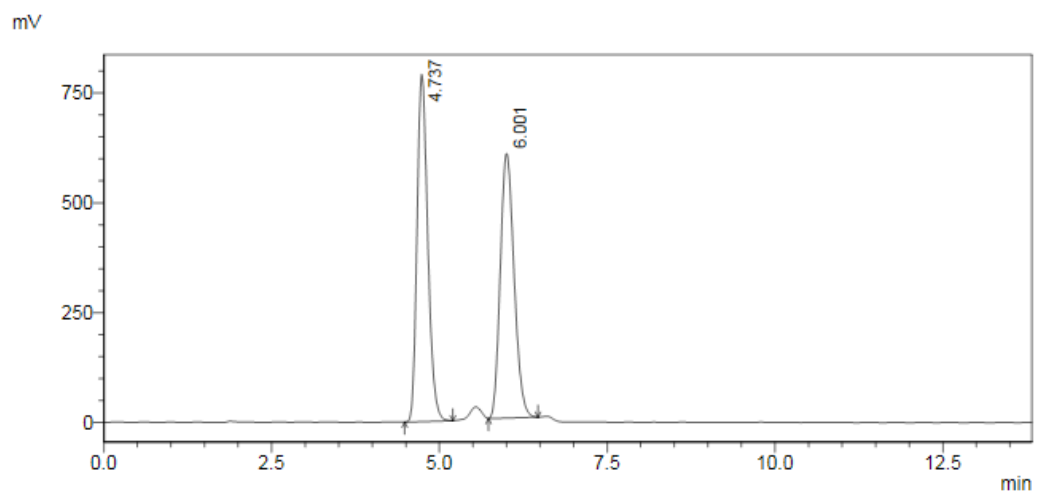

Detector A Channel 1 254nm

| Peak# | Ret. Time | Area%   |
|-------|-----------|---------|
| 1     | 4.737     | 50.607  |
| 2     | 6.001     | 49.393  |
| Total |           | 100.000 |

Chiral  
non-racemic

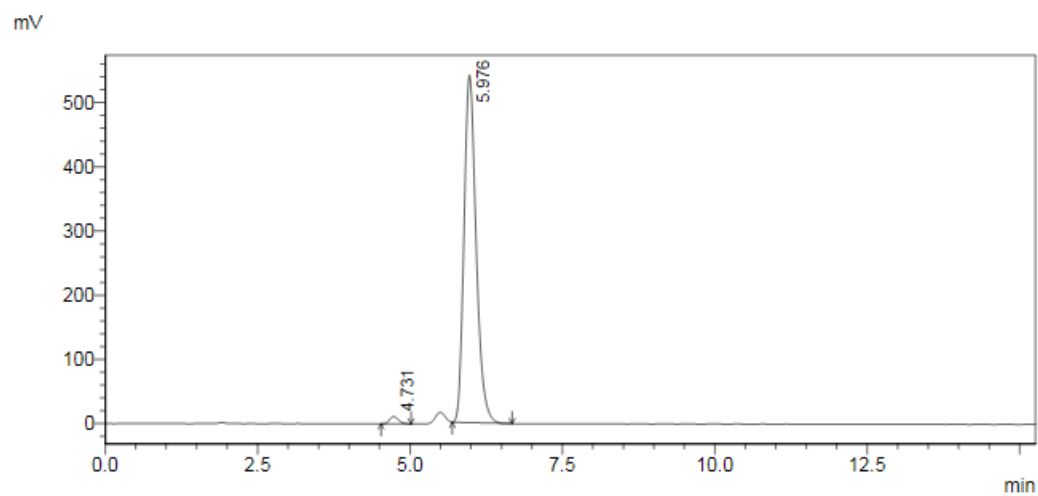

Detector A Channel 1 254nm

| Peak# | Ret. Time | Area%   |
|-------|-----------|---------|
| 1     | 4.731     | 1.544   |
| 2     | 5.976     | 98.456  |
| Total |           | 100.000 |

**Compound 4s**

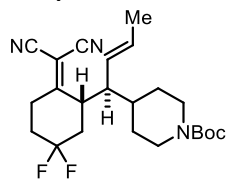

Chiral-racemic

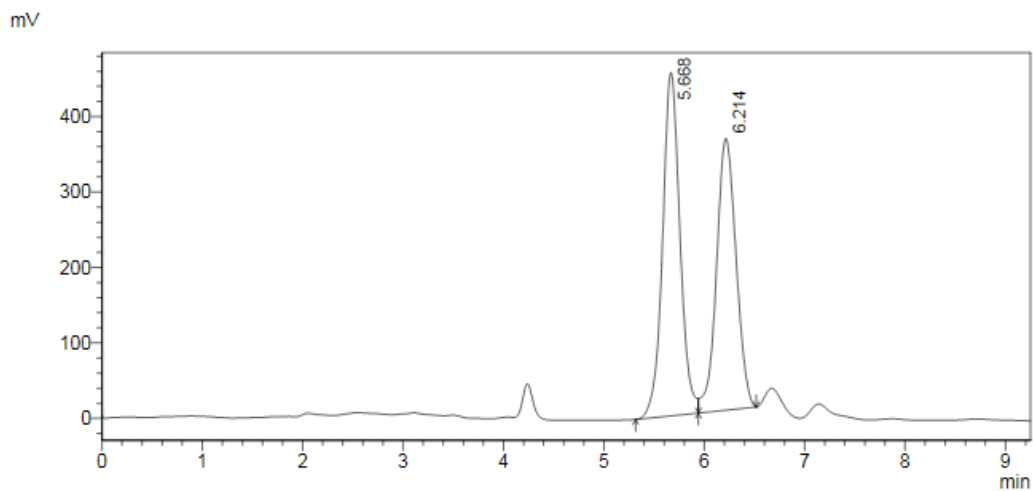

Detector A Channel 1 254nm

| Peak# | Ret. Time | Area%   |
|-------|-----------|---------|
| 1     | 5.668     | 52.839  |
| 2     | 6.214     | 47.161  |
| Total |           | 100.000 |

Chiral  
non-racemic

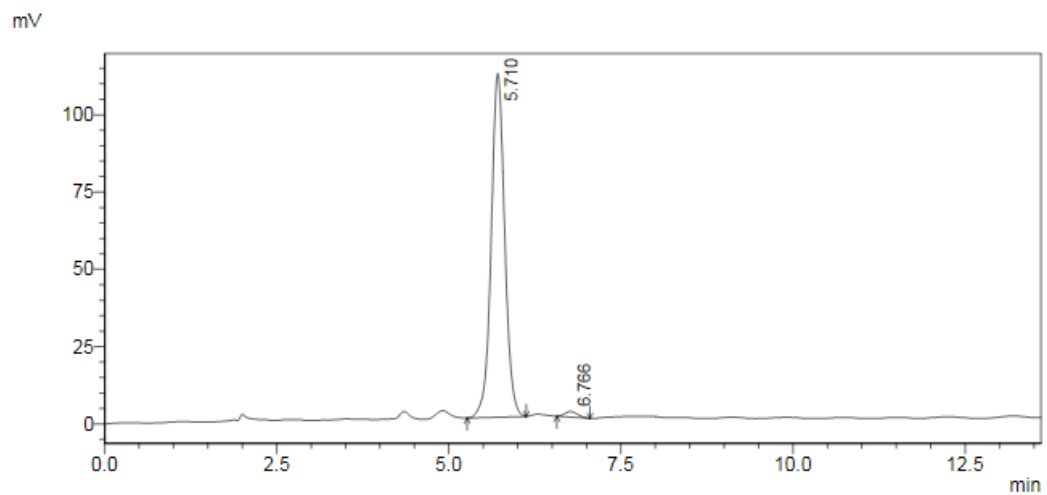

Detector A Channel 1 254nm

| Peak# | Ret. Time | Area%   |
|-------|-----------|---------|
| 1     | 5.710     | 98.494  |
| 2     | 6.766     | 1.506   |
| Total |           | 100.000 |

**Compound 4t**

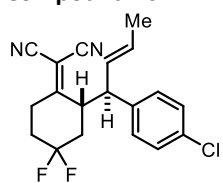

Chiral-racemic

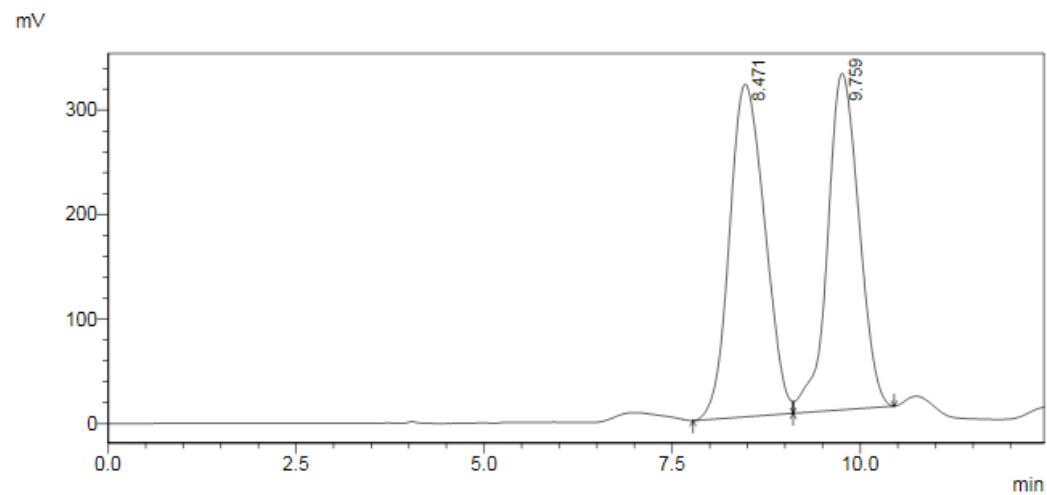

Detector A Channel 1 254nm

| Peak# | Ret. Time | Area%   |
|-------|-----------|---------|
| 1     | 8.471     | 52.474  |
| 2     | 9.759     | 47.526  |
| Total |           | 100.000 |

Chiral  
non-racemic

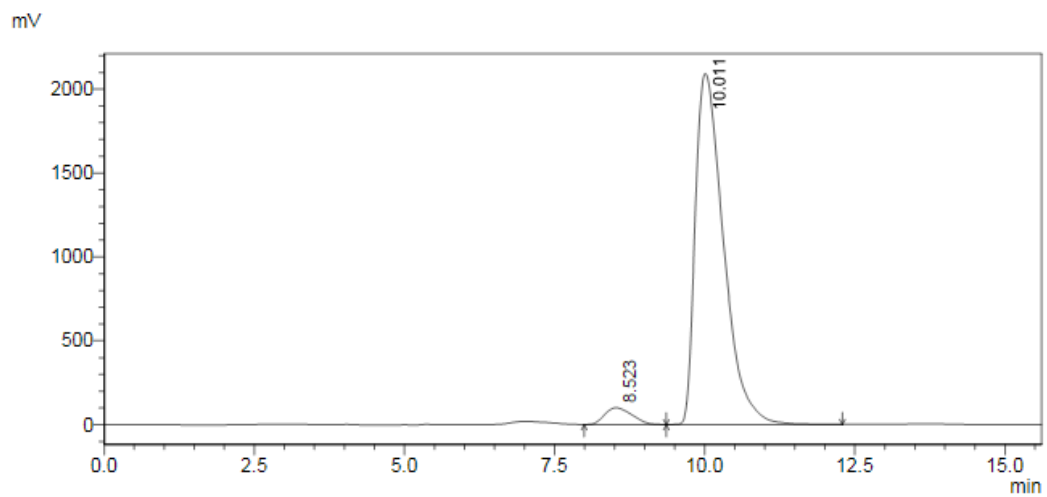

Detector A Channel 1 254nm

| Peak# | Ret. Time | Area%   |
|-------|-----------|---------|
| 1     | 8.523     | 4.479   |
| 2     | 10.011    | 95.521  |
| Total |           | 100.000 |

**Compound 4u**

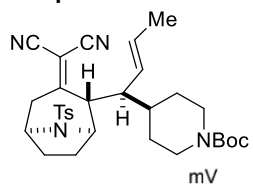

Chiral-  
racemic

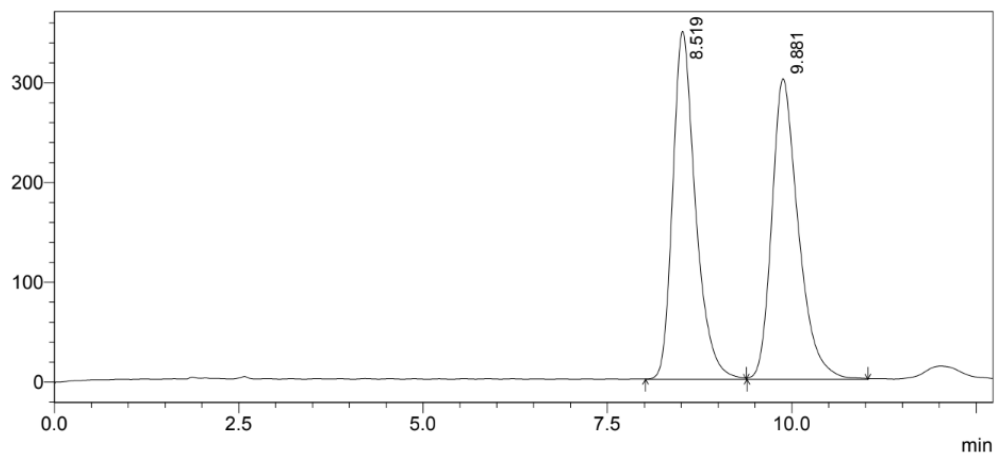

Detector A Channel 1 254nm

| Peak# | Ret. Time | Area%   |
|-------|-----------|---------|
| 1     | 8.519     | 49.862  |
| 2     | 9.881     | 50.138  |
| Total |           | 100.000 |

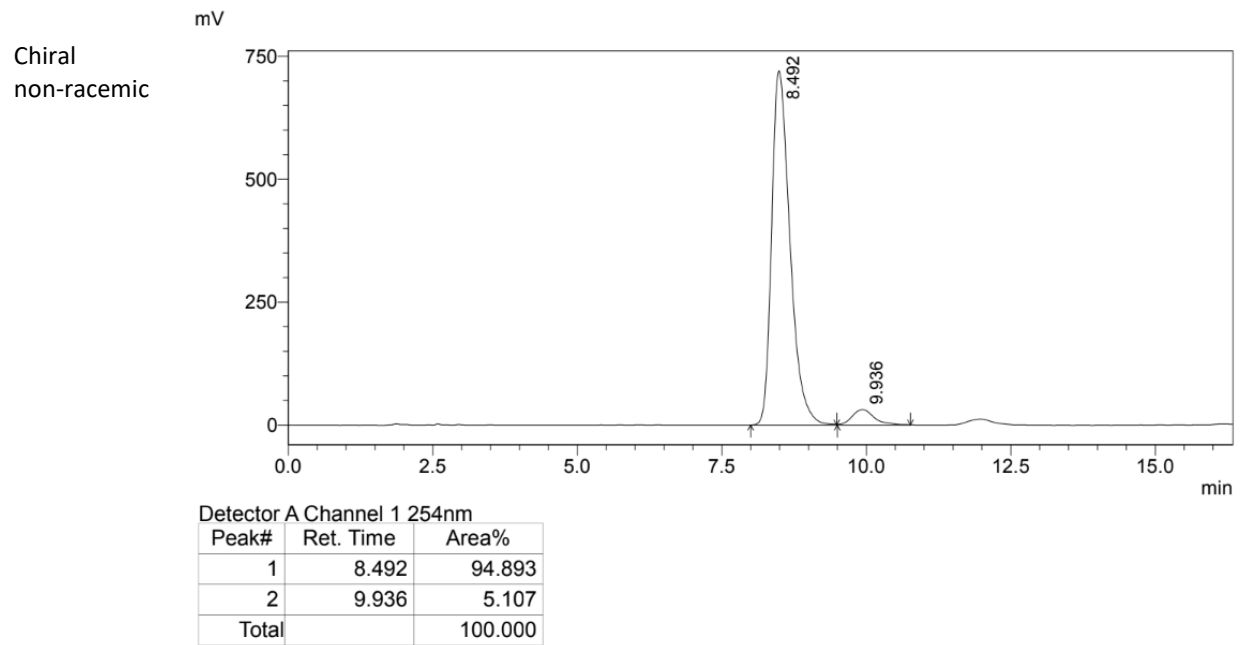

**Compound 4v**

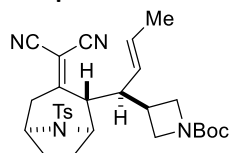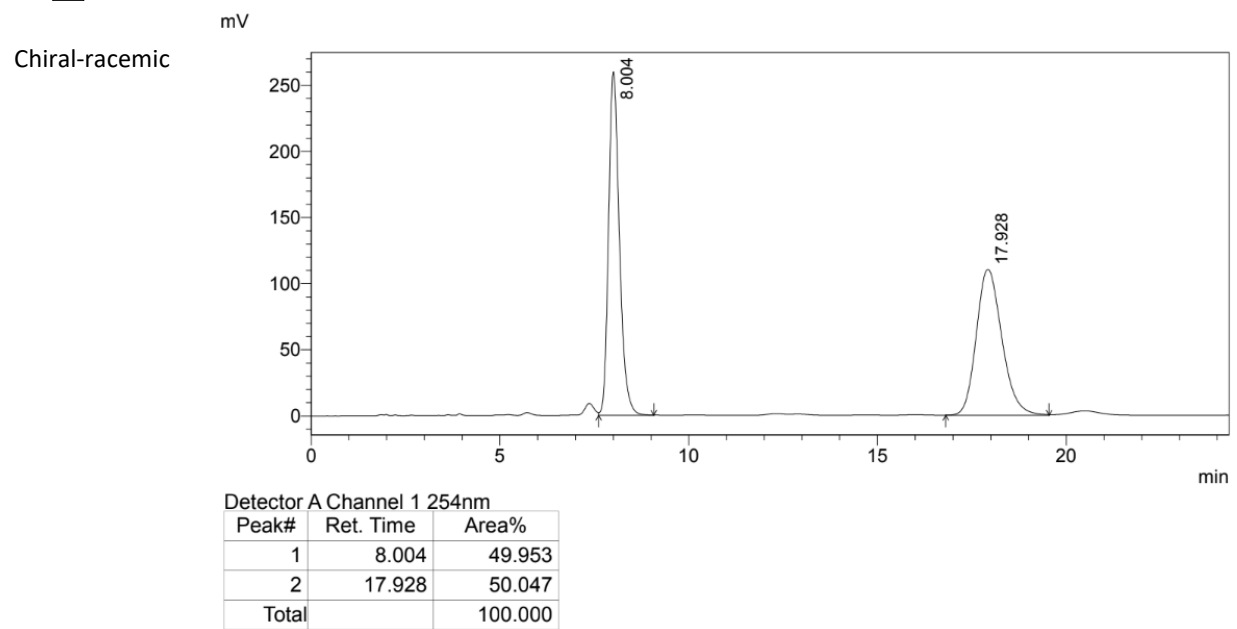

Chiral  
non-racemic

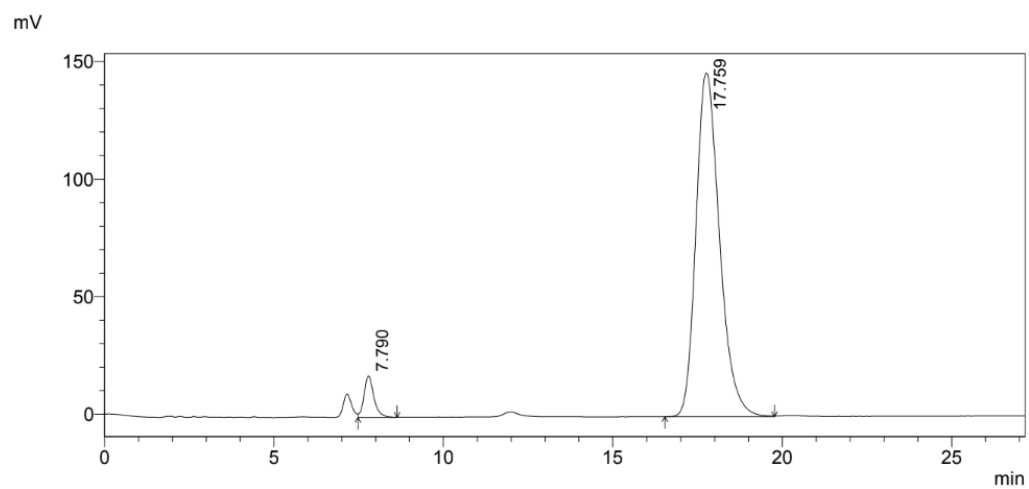

Detector A Channel 1 254nm

| Peak# | Ret. Time | Area%   |
|-------|-----------|---------|
| 1     | 7.790     | 4.795   |
| 2     | 17.759    | 95.205  |
| Total |           | 100.000 |

**Compound 4w**

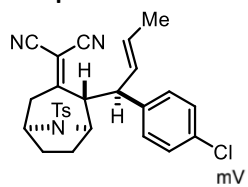

Chiral-racemic

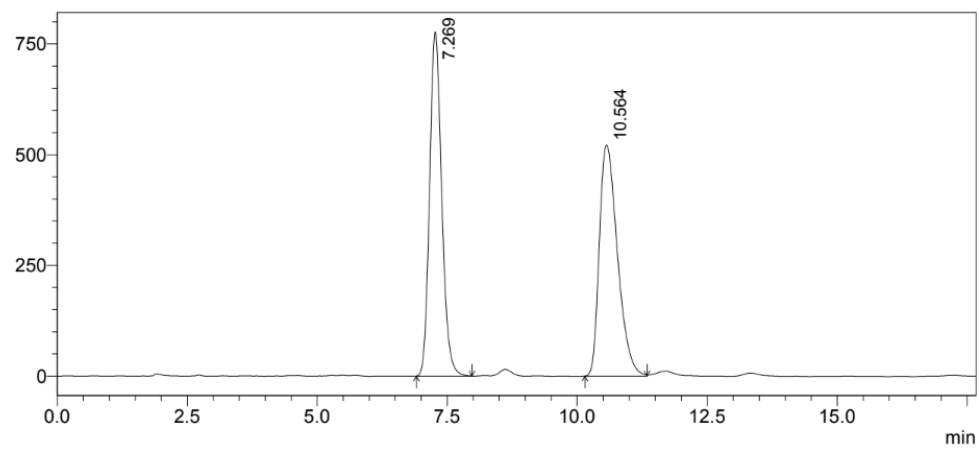

Detector A Channel 1 254nm

| Peak# | Ret. Time | Area%   |
|-------|-----------|---------|
| 1     | 7.269     | 49.947  |
| 2     | 10.564    | 50.053  |
| Total |           | 100.000 |

Chiral  
non-racemic

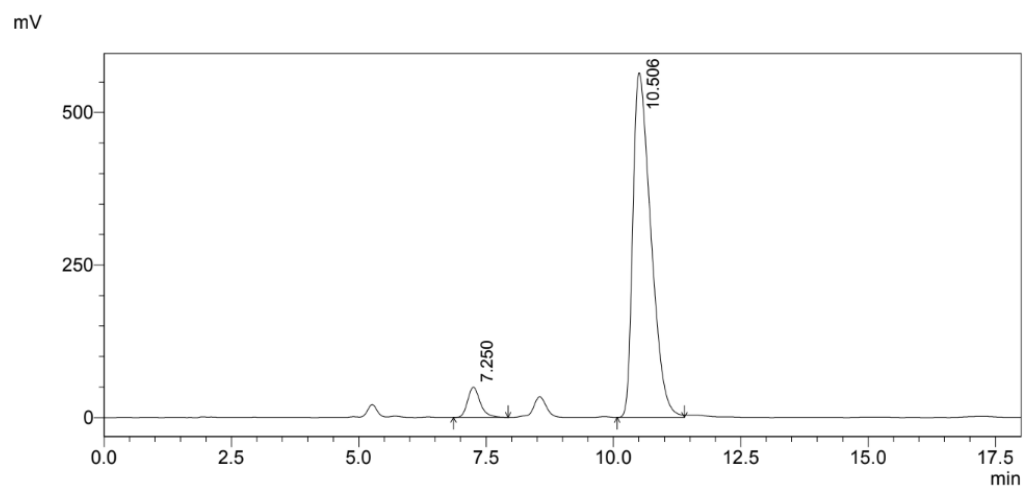

Detector A Channel 1 254nm

| Peak# | Ret. Time | Area%   |
|-------|-----------|---------|
| 1     | 7.250     | 5.825   |
| 2     | 10.506    | 94.175  |
| Total |           | 100.000 |

**Compound 4x**

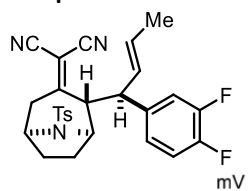

Chiral-racemic

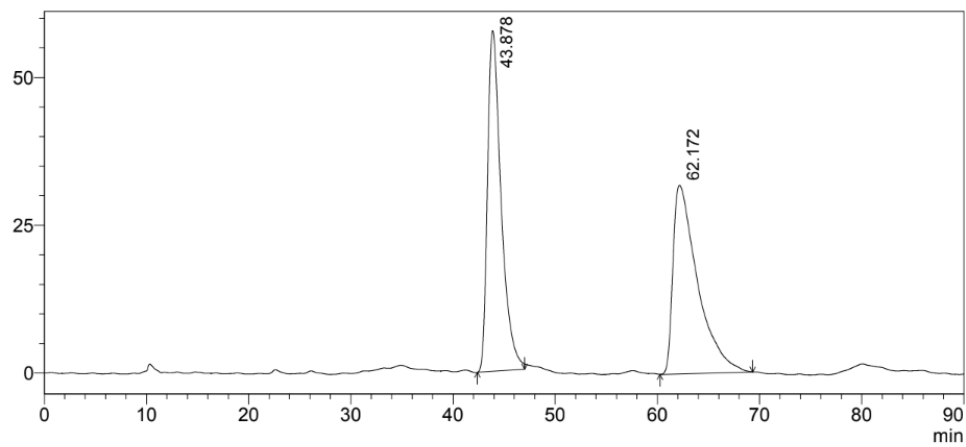

Detector A Channel 2 280nm

| Peak# | Ret. Time | Area%   |
|-------|-----------|---------|
| 1     | 43.878    | 50.028  |
| 2     | 62.172    | 49.972  |
| Total |           | 100.000 |

Chiral  
non-racemic

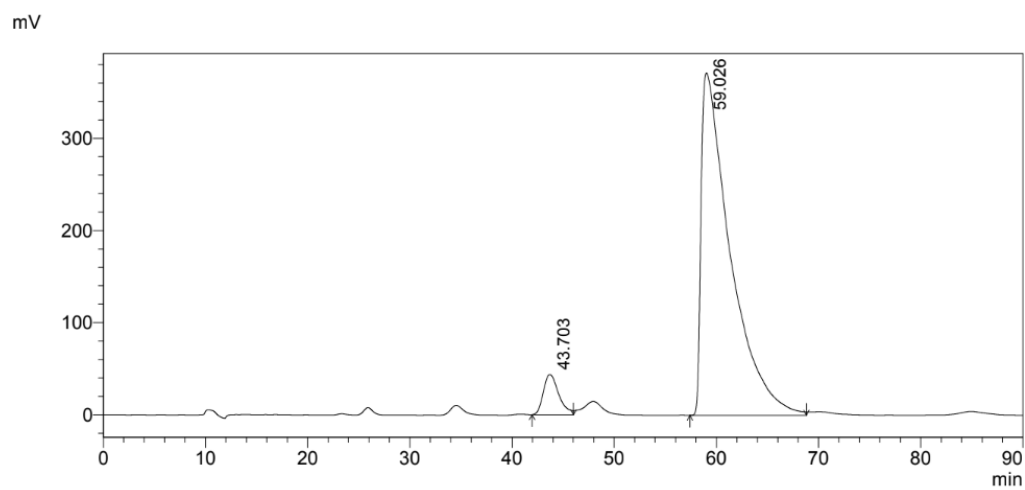

Detector A Channel 2 280nm

| Peak# | Ret. Time | Area%   |
|-------|-----------|---------|
| 1     | 43.703    | 5.882   |
| 2     | 59.026    | 94.118  |
| Total |           | 100.000 |

**Compound 4y**

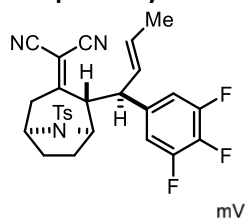

Chiral-racemic

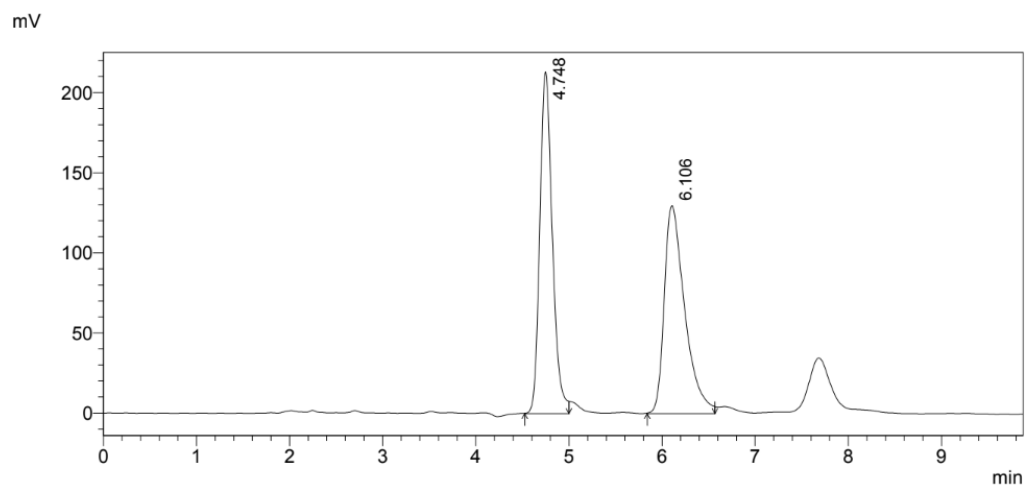

Detector A Channel 1 254nm

| Peak# | Ret. Time | Area%   |
|-------|-----------|---------|
| 1     | 4.748     | 50.189  |
| 2     | 6.106     | 49.811  |
| Total |           | 100.000 |



Chiral  
non-racemic

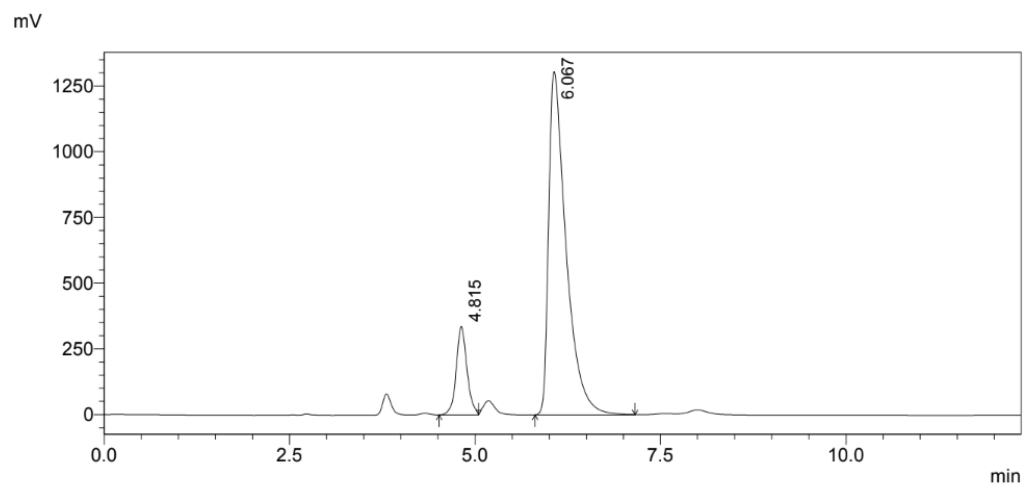

Detector A Channel 1 254nm

| Peak# | Ret. Time | Area%   |
|-------|-----------|---------|
| 1     | 4.815     | 13.723  |
| 2     | 6.067     | 86.277  |
| Total |           | 100.000 |

Chiral  
non-racemic,  
single crystal

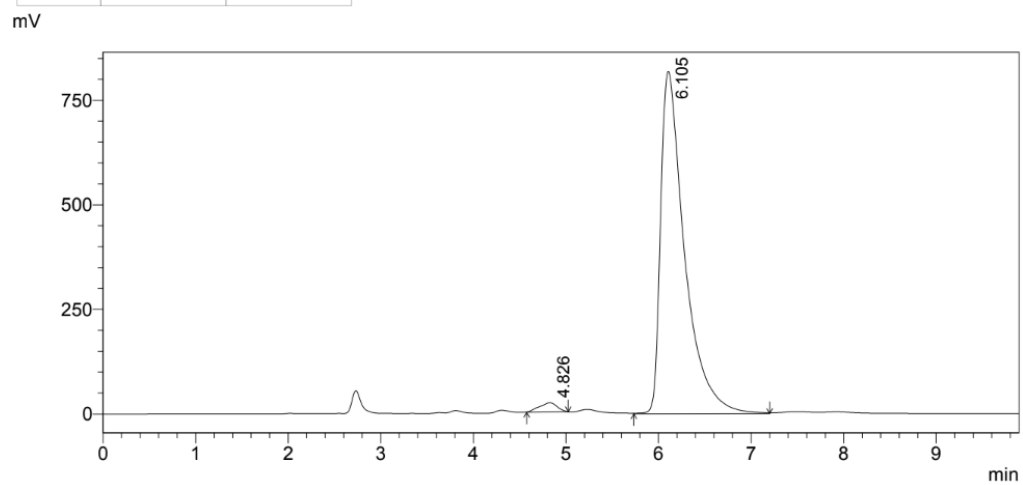

Detector A Channel 1 254nm

| Peak# | Ret. Time | Area%   |
|-------|-----------|---------|
| 1     | 4.826     | 1.991   |
| 2     | 6.105     | 98.009  |
| Total |           | 100.000 |

### Compound 4z

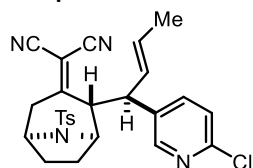

Chiral-racemic

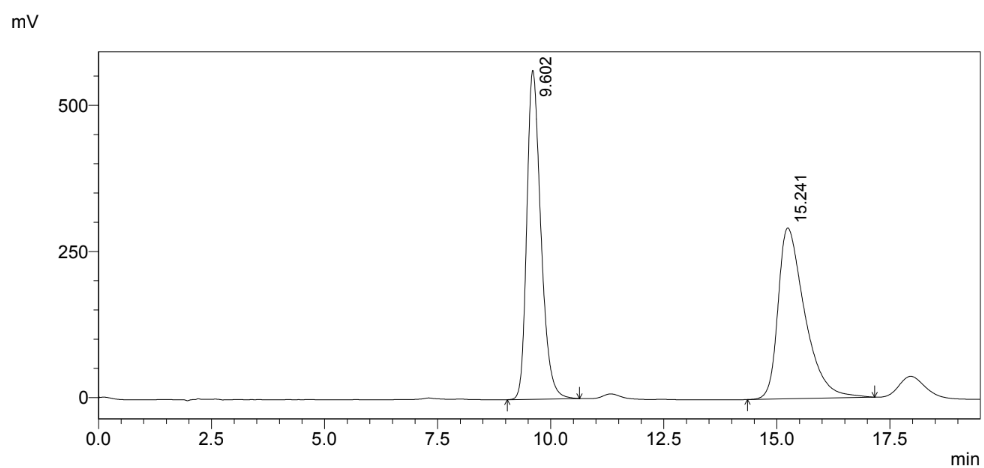

Detector A Channel 1 254nm

| Peak# | Ret. Time | Area%   |
|-------|-----------|---------|
| 1     | 9.602     | 50.300  |
| 2     | 15.241    | 49.700  |
| Total |           | 100.000 |

Chiral  
non-racemic

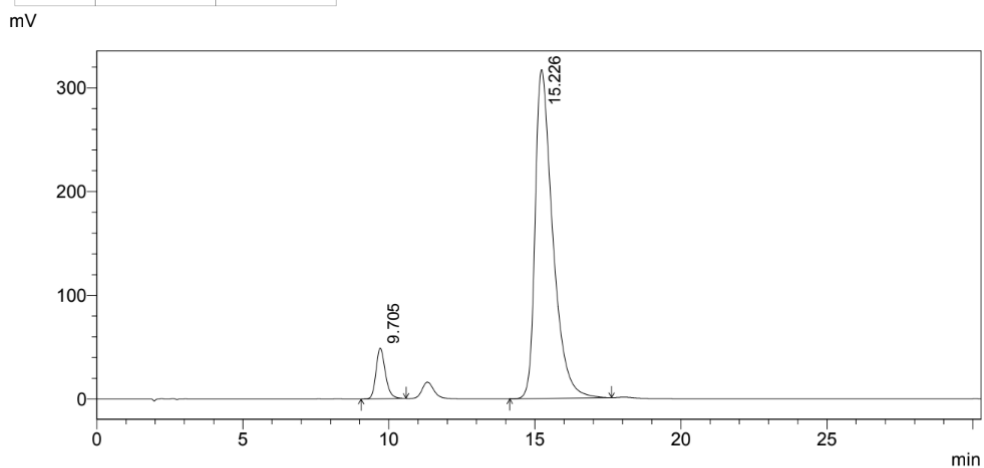

Detector A Channel 1 254nm

| Peak# | Ret. Time | Area%   |
|-------|-----------|---------|
| 1     | 9.705     | 7.664   |
| 2     | 15.226    | 92.336  |
| Total |           | 100.000 |

**Compound 4aa**

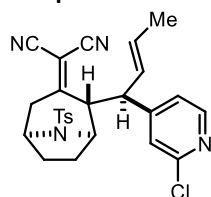

Chiral-racemic

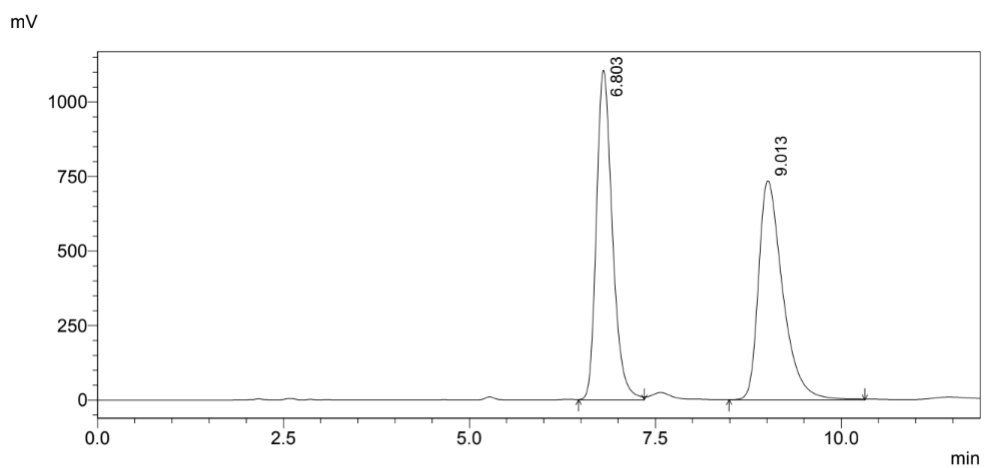

Detector A Channel 1 254nm

| Peak# | Ret. Time | Area%   |
|-------|-----------|---------|
| 1     | 6.803     | 49.849  |
| 2     | 9.013     | 50.151  |
| Total |           | 100.000 |

Chiral  
non-racemic

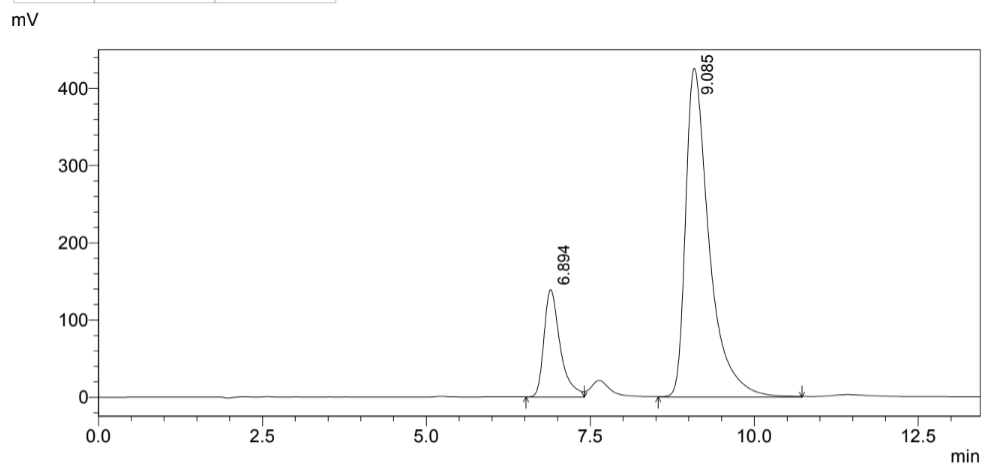

Detector A Channel 1 254nm

| Peak# | Ret. Time | Area%   |
|-------|-----------|---------|
| 1     | 6.894     | 18.343  |
| 2     | 9.085     | 81.657  |
| Total |           | 100.000 |

**Compound 4bb**

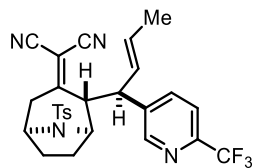

Chiral-racemic

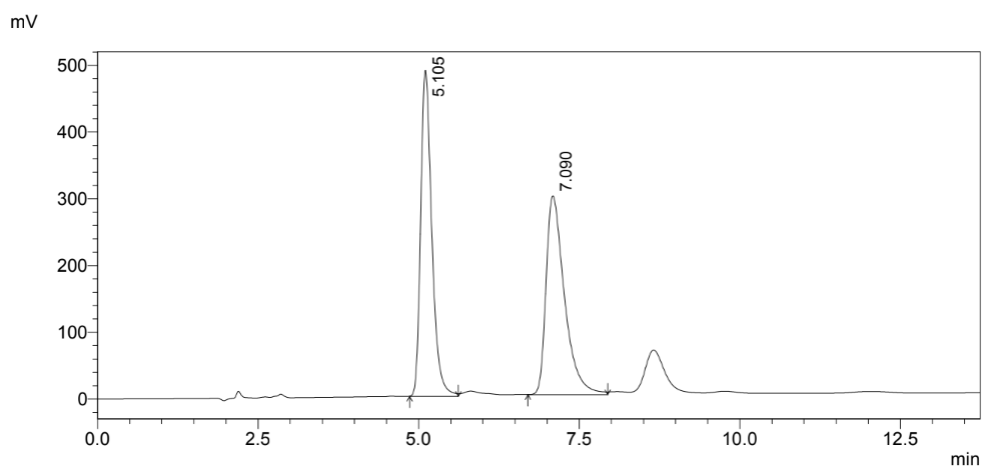

Detector A Channel 1 254nm

| Peak# | Ret. Time | Area%   |
|-------|-----------|---------|
| 1     | 5.105     | 49.733  |
| 2     | 7.090     | 50.267  |
| Total |           | 100.000 |

Chiral  
non-racemic

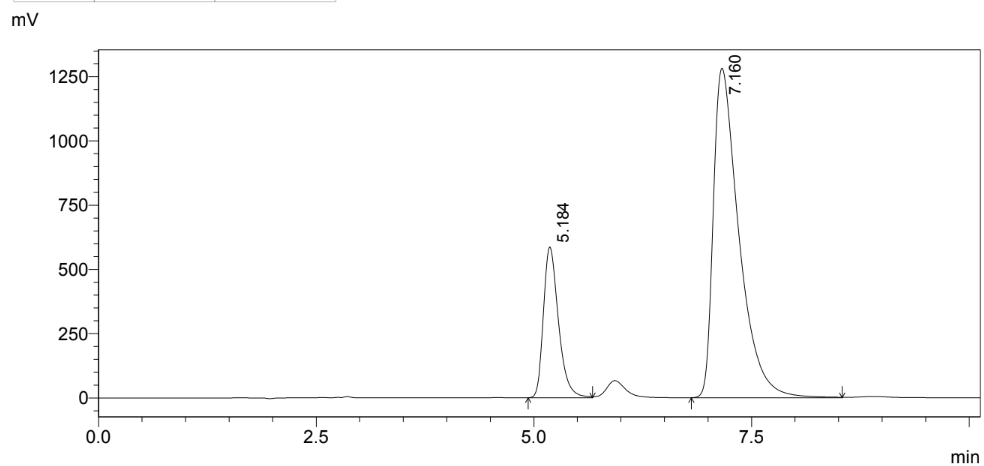

Detector A Channel 1 254nm

| Peak# | Ret. Time | Area%   |
|-------|-----------|---------|
| 1     | 5.184     | 21.192  |
| 2     | 7.160     | 78.808  |
| Total |           | 100.000 |

**Compound 4cc**

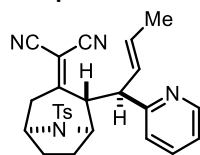

Chiral-racemic

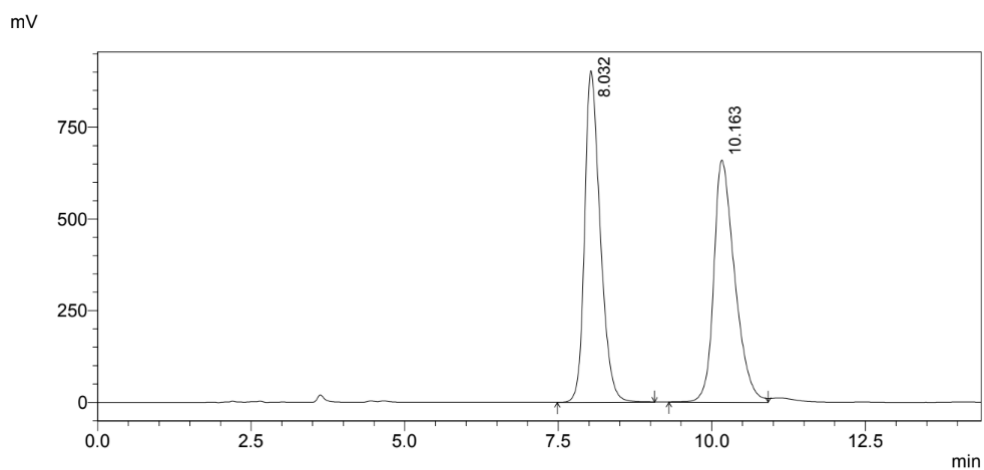

Detector A Channel 1 254nm

| Peak# | Ret. Time | Area%   |
|-------|-----------|---------|
| 1     | 8.032     | 50.439  |
| 2     | 10.163    | 49.561  |
| Total |           | 100.000 |

Chiral  
non-racemic

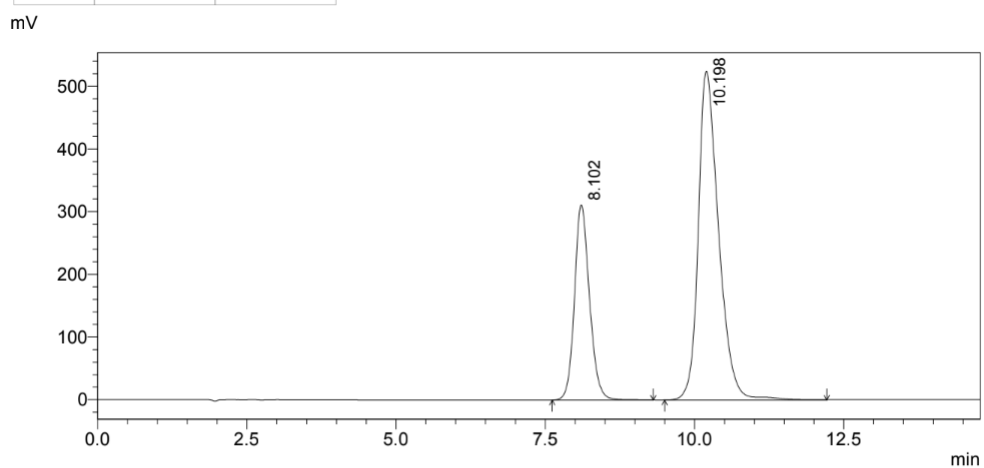

Detector A Channel 1 254nm

| Peak# | Ret. Time | Area%   |
|-------|-----------|---------|
| 1     | 8.102     | 30.460  |
| 2     | 10.198    | 69.540  |
| Total |           | 100.000 |

**Compound 4dd**

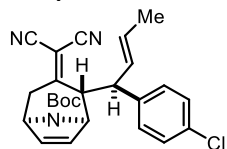

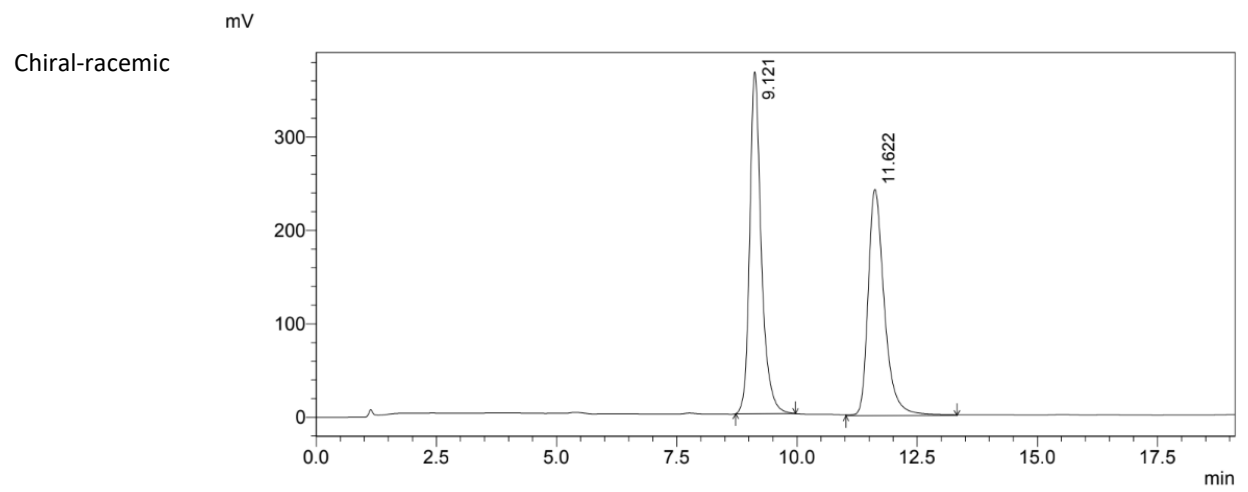

Detector A Channel 1 254nm

| Peak# | Ret. Time | Area%   |
|-------|-----------|---------|
| 1     | 9.121     | 51.790  |
| 2     | 11.622    | 48.210  |
| Total |           | 100.000 |

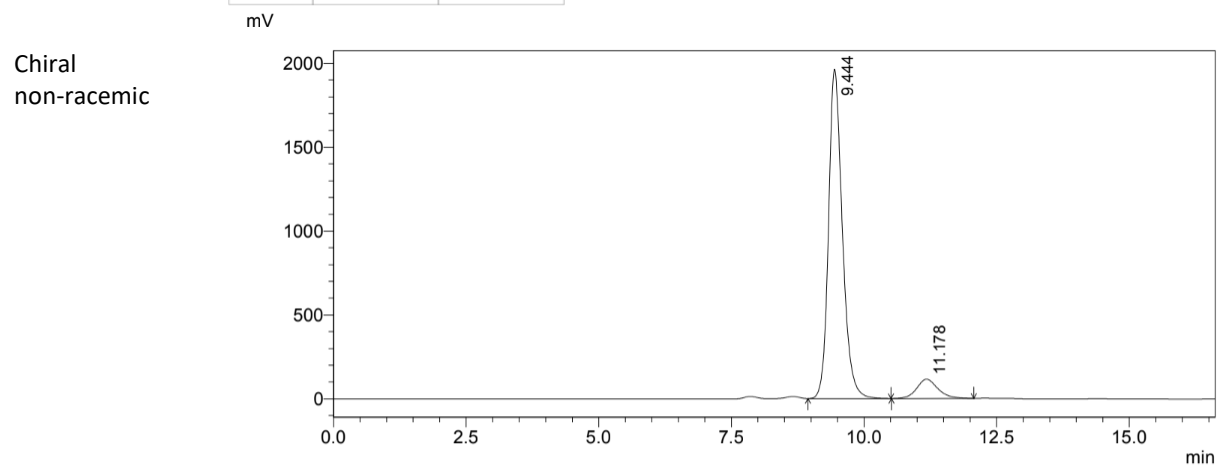

Detector A Channel 1 254nm

| Peak# | Ret. Time | Area%   |
|-------|-----------|---------|
| 1     | 9.444     | 91.794  |
| 2     | 11.178    | 8.206   |
| Total |           | 100.000 |

Chiral  
non-racemic,  
7.4 mmol scale,  
2 mol% Pd

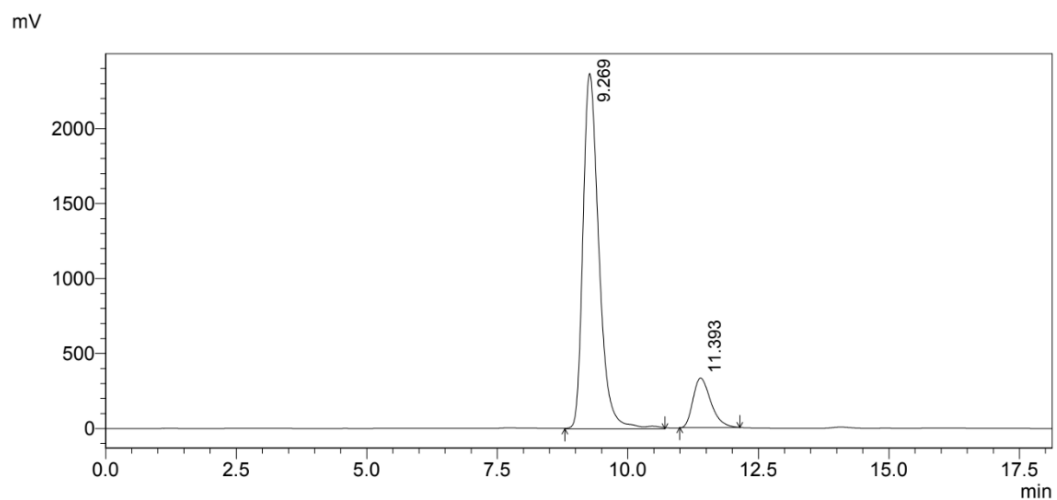

Detector A Channel 1 254nm

| Peak# | Ret. Time | Area%   |
|-------|-----------|---------|
| 1     | 9.269     | 86.486  |
| 2     | 11.393    | 13.514  |
| Total |           | 100.000 |

**Compound 4ee**

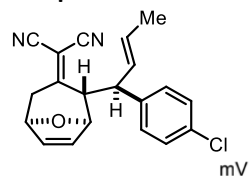

Chiral-racemic

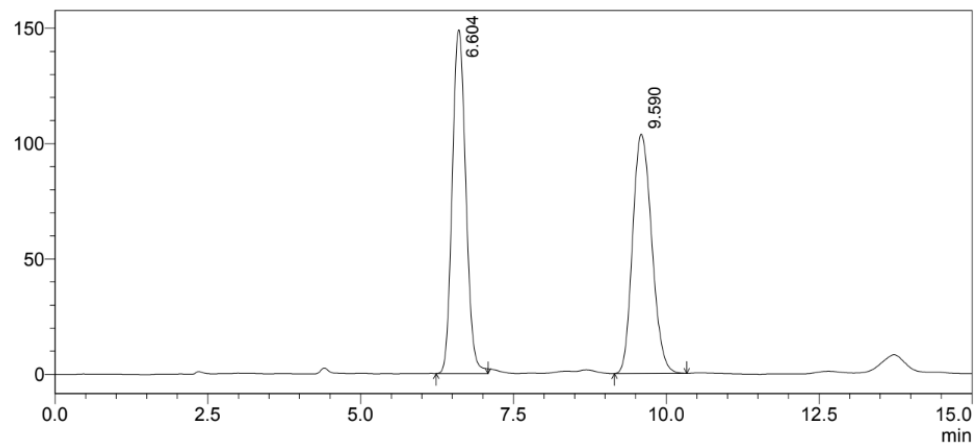

Detector A Channel 1 254nm

| Peak# | Ret. Time | Area%   |
|-------|-----------|---------|
| 1     | 6.604     | 50.377  |
| 2     | 9.590     | 49.623  |
| Total |           | 100.000 |

Chiral  
non-racemic

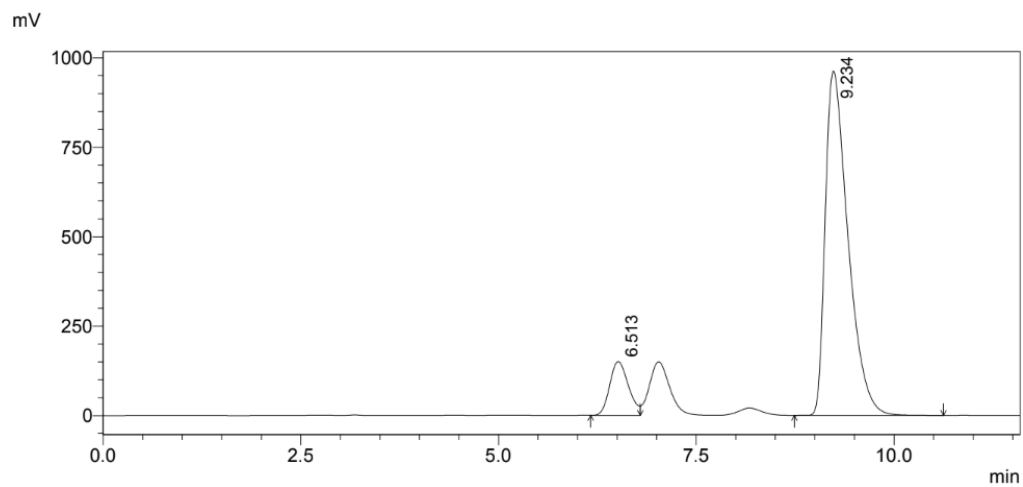

Detector A Channel 1 254nm

| Peak# | Ret. Time | Area%   |
|-------|-----------|---------|
| 1     | 6.513     | 11.422  |
| 2     | 9.234     | 88.578  |
| Total |           | 100.000 |

**Compound 6ff**

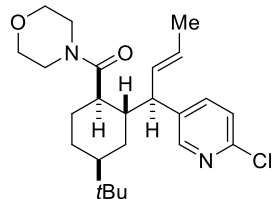

Chiral-racemic

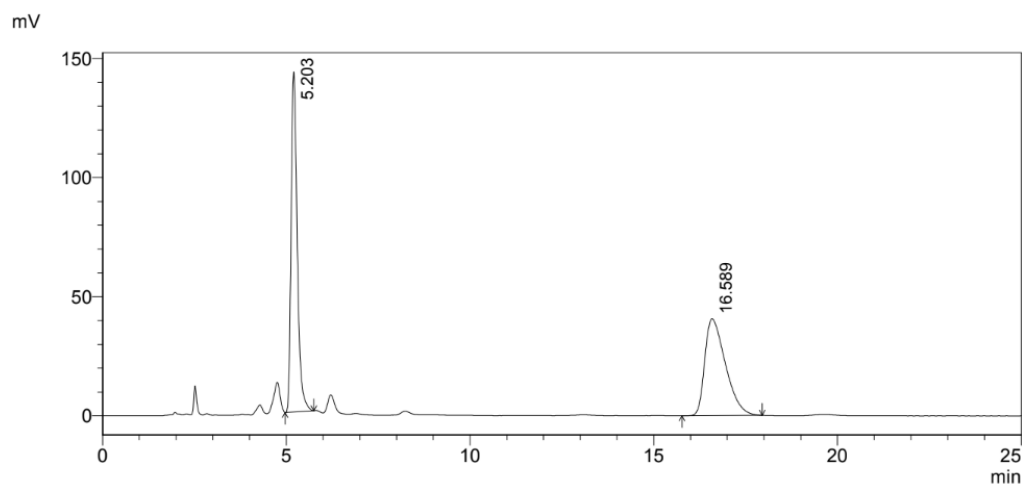

Detector A Channel 1 254nm

| Peak# | Ret. Time | Area%   |
|-------|-----------|---------|
| 1     | 5.203     | 50.855  |
| 2     | 16.589    | 49.145  |
| Total |           | 100.000 |



Chiral  
non-racemic

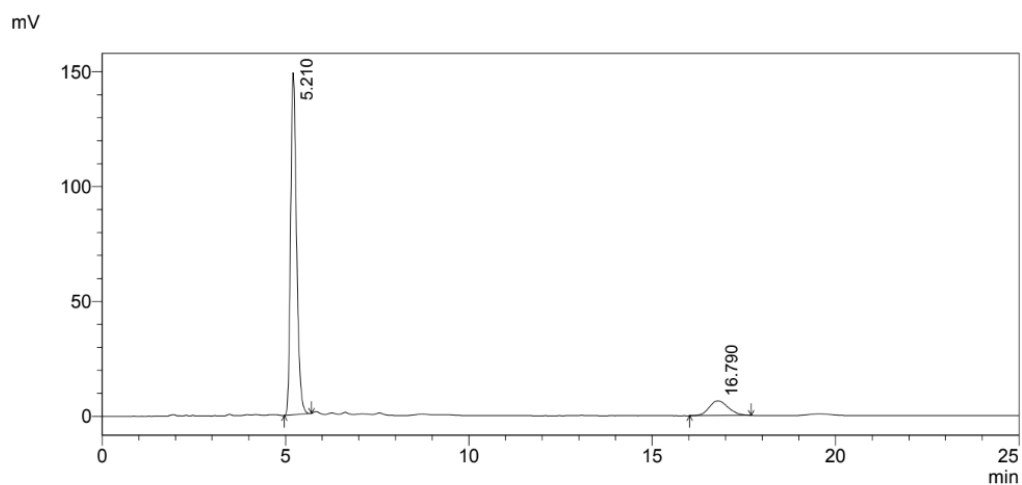

Detector A Channel 1 254nm

| Peak# | Ret. Time | Area%   |
|-------|-----------|---------|
| 1     | 5.210     | 87.873  |
| 2     | 16.790    | 12.127  |
| Total |           | 100.000 |

**Compound 11b**

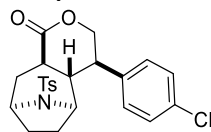

Chiral-racemic

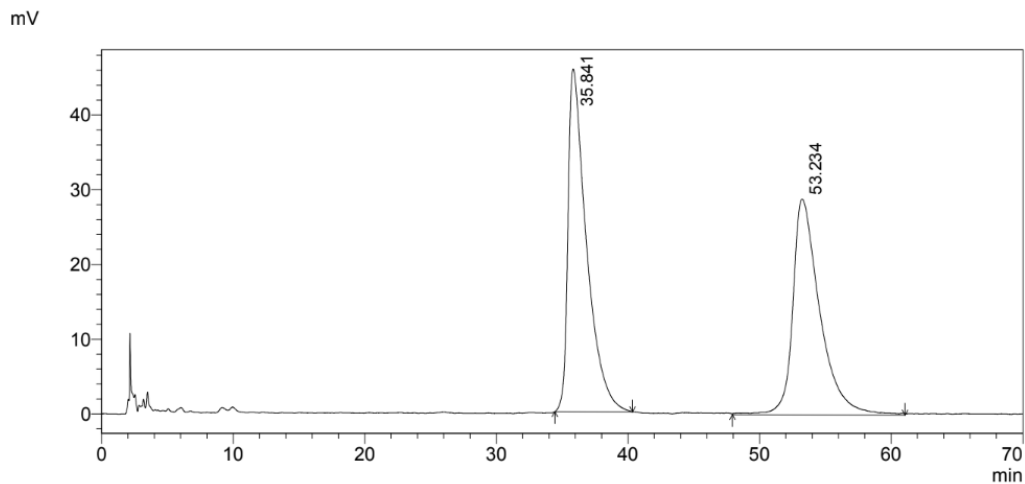

Detector A Channel 1 254nm

| Peak# | Ret. Time | Area%   |
|-------|-----------|---------|
| 1     | 35.841    | 51.889  |
| 2     | 53.234    | 48.111  |
| Total |           | 100.000 |

Chiral  
non-racemic

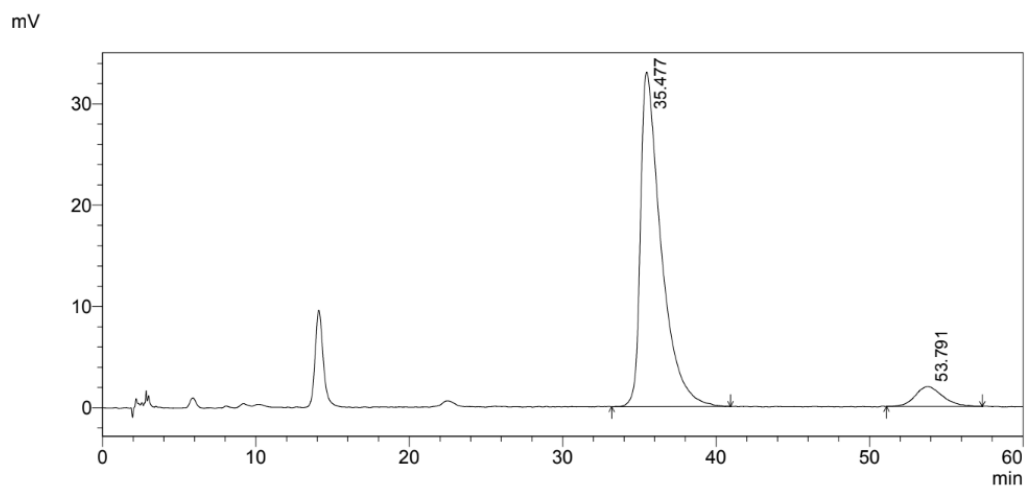

Detector A Channel 1 254nm

| Peak# | Ret. Time | Area%   |
|-------|-----------|---------|
| 1     | 35.477    | 92.633  |
| 2     | 53.791    | 7.367   |
| Total |           | 100.000 |

Chiral  
non-racemic,  
single crystal

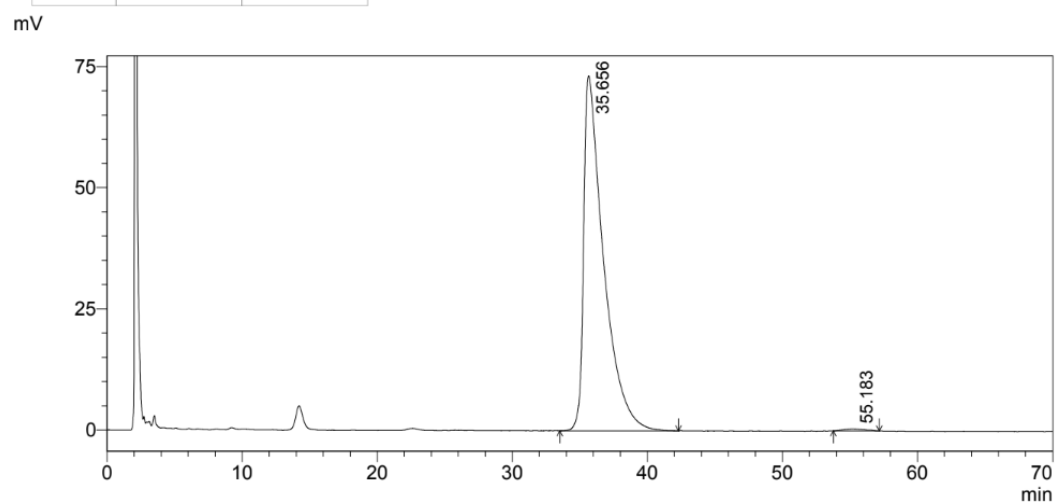

Detector A Channel 1 254nm

| Peak# | Ret. Time | Area%   |
|-------|-----------|---------|
| 1     | 35.656    | 99.390  |
| 2     | 55.183    | 0.610   |
| Total |           | 100.000 |
